# Supplementary material for: The biology of lysine acetylation integrates transcriptional programming and metabolism
Source: Nutr Metab (Lond). 2011 Mar 3;8:12. doi: 10.1186/1743-7075-8-12 (PMC3060110; doi:10.1186/1743-7075-8-12)
Supplement: Additional file 1 — Functional clusters were generated from the list of lysine-acetylated proteins using the DAVID 6.7 bioinformatics resources functional annotation tool. The acetylated proteins are distributed into 526 functional clusters generated by the software using a heuristic fuzzy clustering concept that measures relationships among the annotation terms based on the degree of their co-association to cluster similar annotations into functional annotation groups. The annotation clusters are assigned "enrichment scores" in decreasing order of occurrence that are quantitatively measured by some common and well-known statistical methods, including Fisher's exact test, binomial probability and hypergeometric distribution. [file 1743-7075-8-12-S1.XLS]

## Sheet: Functional Annotation Clusters
List of 526 Functional clusters generated from the list of lysine acetylated proteins using the DAVID 6.7 bioinformatics resources functional annotation tool.
ANNOTATION CLUSTERS	ENRICHMENT SCORES	COUNT		PVALUE	Genes	List Total	Pop Hits	Pop Total	Fold Enrichment	Bonferroni	Benjamini	FDR
Annotation Cluster 1	Enrichment Score: 80.74886874752735
Category	Term	Count	%	PValue	Genes	List Total	Pop Hits	Pop Total	Fold Enrichment	Bonferroni	Benjamini	FDR
GOTERM_CC_FAT	GO:0070013~intracellular organelle lumen	495	26.0252	8.99424e-100	Q9NUZ0,Q5VVD0,Q53RX0,Q99414,O75496,Q5H924,Q32Q20,Q59H21,A1L4K2,Q7L124,Q6IAL5,Q05CI5,Q6P3S4,Q5CZ83,Q53S89,Q53TX0,Q59H27,Q0EF63,Q59F45,Q0EF62,Q5THS4,Q59ES8,Q8NC65,Q59F49,Q9Y4A5,Q96SB3,Q8TBS8,Q0VAE4,A8K6F2,Q56D06,Q5I6Y6,Q5VVC8,Q9NSE4,Q16740,Q5I6Y4,Q5I6Y5,Q5VVC9,Q9UGJ0,Q32Q22,Q8NI62,Q04837,Q6NW36,Q9HAN0,Q96BS4,Q96L91,Q59GP7,Q6NR85,Q5TZP9,Q49A90,Q5TZP7,Q8TD98,Q6TCH8,Q8IXG0,Q9NXF1,O75478,P13667,Q05CK9,…	1438	1779	12782	2.47326	5.89123e-97	5.89123e-97	1.34432e-96
GOTERM_CC_FAT	GO:0031974~membrane-enclosed lumen	505	26.551	4.20501e-98	Q9NUZ0,Q5VVD0,Q53RX0,Q99414,O75496,Q5H924,Q32Q20,Q59H21,A1L4K2,Q7L124,Q6IAL5,Q05CI5,Q6P3S4,Q5CZ83,Q53S89,Q53TX0,Q59H27,Q0EF63,Q59F45,Q0EF62,Q5THS4,Q59ES8,Q8NC65,Q59F49,Q9Y4A5,Q96SB3,Q8TBS8,Q0VAE4,A8K6F2,Q56D06,Q5I6Y6,Q5VVC8,Q9NSE4,Q16740,Q5I6Y4,Q5I6Y5,Q5VVC9,Q9UGJ0,Q32Q22,Q8NI62,Q04837,Q6NW36,Q9HAN0,Q96BS4,Q96L91,Q59GP7,Q6NR85,Q5TZP9,Q49A90,Q9P1A0,Q5TZP7,Q8TD98,Q6TCH8,Q8IXG0,Q9NXF1,O75478,Q5U0M9,…	1438	1856	12782	2.41854	2.75428e-95	1.37714e-95	6.285e-95
GOTERM_CC_FAT	GO:0043233~organelle lumen	495	26.0252	1.1704e-95	Q9NUZ0,Q5VVD0,Q53RX0,Q99414,O75496,Q5H924,Q32Q20,Q59H21,A1L4K2,Q7L124,Q6IAL5,Q05CI5,Q6P3S4,Q5CZ83,Q53S89,Q53TX0,Q59H27,Q0EF63,Q59F45,Q0EF62,Q5THS4,Q59ES8,Q8NC65,Q59F49,Q9Y4A5,Q96SB3,Q8TBS8,Q0VAE4,A8K6F2,Q56D06,Q5I6Y6,Q5VVC8,Q9NSE4,Q16740,Q5I6Y4,Q5I6Y5,Q5VVC9,Q9UGJ0,Q32Q22,Q8NI62,Q04837,Q6NW36,Q9HAN0,Q96BS4,Q96L91,Q59GP7,Q6NR85,Q5TZP9,Q49A90,Q5TZP7,Q8TD98,Q6TCH8,Q8IXG0,Q9NXF1,O75478,P13667,Q05CK9,…	1438	1820	12782	2.41754	7.6661e-93	2.55537e-93	1.74933e-92
GOTERM_CC_FAT	GO:0031981~nuclear lumen	385	20.2419	7.37637e-68	Q5VVD0,Q99414,O75496,Q5H924,Q32Q20,Q59H21,A1L4K2,Q6P3S4,Q05CI5,Q5CZ83,Q59F45,Q0EF63,Q0EF62,Q5THS4,Q59ES8,Q8NC65,Q59F49,Q9Y4A5,Q96SB3,Q0VAE4,Q8TBS8,A8K6F2,Q56D06,Q5VVC8,Q5I6Y6,Q5I6Y4,Q5VVC9,Q5I6Y5,Q9UGJ0,Q32Q22,Q8NI62,Q6NW36,Q96BS4,Q96L91,Q59GP7,Q5TZP9,Q49A90,Q5TZP7,Q8TD98,Q8IXG0,Q9NXF1,O75478,Q05CK9,Q53GK6,Q1XE77,A8K6E7,P01106,Q59H49,Q59EQ2,A8K6E5,Q57Z54,Q5BKZ1,Q6FG89,P51991,Q0VAC0,Q13632,Q7Z755,…	1438	1450	12782	2.36011	4.83152e-65	8.05254e-66	1.10251e-64
GOTERM_CC_FAT	GO:0005654~nucleoplasm	247	12.9863	5.51758e-46	Q6DRA9,Q96G51,P13984,Q99414,A6NIT8,Q562S0,Q6PIA1,O75496,Q32Q20,A1L4K2,Q6P3S4,Q9BV64,Q05BI2,Q5CZ83,Q59G24,Q92922,Q53HM6,A7E2X7,Q59F45,Q0EF63,Q0EF62,Q69YZ5,Q59F49,Q9Y4A5,Q96SB3,Q0VAE4,Q8TBS8,Q01105,Q56D06,Q53T94,Q5VWG9,O95983,A6NJ44,Q9UGJ0,P14635,Q8NI62,Q9UPG3,Q17RB6,Q96L91,Q5TZP9,Q49A90,Q5TZP7,Q8TD98,Q8IXG0,O75478,O75376,Q53XI7,Q53T61,Q96FV9,A8K5E3,Q9BTA9,Q53GK6,Q05CK9,A8K6E7,P01106,Q6IPL9,Q53HK8,…	1438	882	12782	2.48925	3.61402e-43	4.01557e-44	8.24682e-43
Annotation Cluster 2	Enrichment Score: 37.308615281429624
Category	Term	Count	%	PValue	Genes	List Total	Pop Hits	Pop Total	Fold Enrichment	Bonferroni	Benjamini	FDR
SP_PIR_KEYWORDS	transit peptide	162	8.51735	7.70486e-48	Q9NUZ0,A4QPB4,Q8N5H5,A8K2Z6,Q53RX0,Q9NP81,Q86YB5,Q7L124,Q6IAL5,Q9BV61,Q53TX0,Q53S89,Q86TQ8,Q96Q11,Q96K48,Q8TAS0,P13995,Q9NSE4,Q16740,A8K290,P13073,Q04837,Q9HAN0,Q2YDB7,Q16836,Q5HYG8,Q9P1A0,Q5HYG7,Q1L6K4,Q6TCH8,Q6LCA3,Q53T69,A4D0W4,Q1L6K6,Q5U0M9,Q6UB35,Q1RMZ4,Q8TEA8,Q8NAS5,P51398,O15091,P22307,Q75KN0,Q86UA3,Q13584,Q53T76,P21953,Q96G65,O75879,Q9BUX5,P06576,Q53GL5,P13051,P55084,Q9H5H1,P07954,Q59FN3,…	1895	476	19235	3.45455	4.88488e-45	6.1061e-46	1.14653e-44
GOTERM_CC_FAT	GO:0005739~mitochondrion	283	14.8791	2.80139e-46	Q9NUZ0,A4QPB4,Q8N5H5,O75964,A8K2Z6,Q8IXI2,Q53RX0,Q5H9R2,Q9NP81,Q86YB5,P00167,A8K281,Q5T952,A8K6Y3,Q68DF1,Q7L124,Q6IAL5,Q59H27,Q53TX0,Q53S89,Q9BV61,Q59F44,Q86TQ8,Q9UDG5,Q96Q11,Q96K48,A8K6F2,P13995,Q92934,Q8TAS0,A6NMA4,Q9NSE4,Q16740,A8K290,P13073,Q04837,P14317,Q9HAN0,P67775,Q6NR85,Q59GP7,Q2YDB7,Q16836,Q5HYG8,Q9P1A0,Q5HYG7,Q6TCH8,Q1L6K4,Q6LCA3,Q53T69,Q9BQ69,Q86WA6,A4D0W4,Q1L6K6,Q5U0M9,Q9UC85,Q8N163,…	1438	1087	12782	2.31418	1.83491e-43	2.29364e-44	4.18708e-43
UP_SEQ_FEATURE	transit peptide:Mitochondrion	157	8.25447	1.69563e-45	Q9NUZ0,A4QPB4,Q8N5H5,A8K2Z6,Q53RX0,Q9NP81,Q86YB5,Q7L124,Q6IAL5,Q9BV61,Q53TX0,Q53S89,Q86TQ8,Q96Q11,Q96K48,Q8TAS0,P13995,Q9NSE4,Q16740,A8K290,P13073,Q04837,Q9HAN0,Q16836,Q2YDB7,Q5HYG8,Q9P1A0,Q5HYG7,Q1L6K4,Q6TCH8,Q6LCA3,Q53T69,A4D0W4,Q1L6K6,Q5U0M9,Q1RMZ4,Q6UB35,Q8TEA8,Q8NAS5,P51398,O15091,Q75KN0,Q86UA3,Q13584,Q53T76,P21953,Q96G65,O75879,Q9BUX5,P06576,Q53GL5,P55084,Q9H5H1,P07954,Q16854,O75390,Q59FN3,…	1886	467	19113	3.40698	7.20304e-42	7.20304e-42	3.17151e-42
SP_PIR_KEYWORDS	mitochondrion	217	11.409	6.56491e-43	A4QPB4,Q9NUZ0,Q8N5H5,O75964,A8K2Z6,Q8IXI2,Q53RX0,Q5H9R2,Q9NP81,Q86YB5,P27635,Q5T952,Q7L124,Q6IAL5,Q53TX0,Q53S89,Q9BV61,Q86TQ8,Q96Q11,Q96K48,P13995,Q92934,Q8TAS0,Q9NSE4,Q16740,A8K290,P13073,Q04837,P14317,Q9HAN0,Q2YDB7,Q16836,Q5HYG8,Q9P1A0,Q5HYG7,Q6TCH8,Q1L6K4,Q6LCA3,Q53T69,A4D0W4,Q1L6K6,Q5U0M9,Q6UB35,Q1RMZ4,Q8TEA8,Q8NAS5,P51398,O15091,P22307,Q75KN0,Q86UA3,Q05DN3,Q13584,Q5T331,P14927,Q53T76,P21953,…	1895	832	19235	2.6474	4.16215e-40	4.16215e-41	9.769e-40
GOTERM_CC_FAT	GO:0005759~mitochondrial matrix	99	5.20505	3.39758e-35	A8K512,Q9NUZ0,P00367,Q53RX0,Q9NP81,Q6IAL5,Q53S89,Q53TX0,Q53XZ9,Q86TQ8,Q9NYK5,Q9UHN1,Q5JPU1,Q9HC01,Q8TAS0,Q5JPU2,Q5JPU0,P10515,Q5HYW6,Q9NSE4,Q16740,P41250,Q5JPU3,Q2F839,Q5HYW4,A8K290,Q6LEN1,Q04837,Q53ET4,P49590,Q9HAN0,Q8TAA5,Q6NR85,Q2YDB7,Q16836,Q5HYG8,Q5HYG7,Q96AM7,Q6TCH8,Q6LCA3,P23368,Q6LCK9,Q53T69,Q5JPT8,Q5JPT9,Q8N163,Q1RMZ4,Q8TEA8,Q9HD33,Q8NAS5,P51398,P11310,Q6FGL4,Q5T4U4,P78557,P21953,Q96G65,…	1438	227	12782	3.87658	2.22542e-32	1.71186e-33	5.07818e-32
GOTERM_CC_FAT	GO:0031980~mitochondrial lumen	99	5.20505	3.39758e-35	A8K512,Q9NUZ0,P00367,Q53RX0,Q9NP81,Q6IAL5,Q53S89,Q53TX0,Q53XZ9,Q86TQ8,Q9NYK5,Q9UHN1,Q5JPU1,Q9HC01,Q8TAS0,Q5JPU2,Q5JPU0,P10515,Q5HYW6,Q9NSE4,Q16740,P41250,Q5JPU3,Q2F839,Q5HYW4,A8K290,Q6LEN1,Q04837,Q53ET4,P49590,Q9HAN0,Q8TAA5,Q6NR85,Q2YDB7,Q16836,Q5HYG8,Q5HYG7,Q96AM7,Q6TCH8,Q6LCA3,P23368,Q6LCK9,Q53T69,Q5JPT8,Q5JPT9,Q8N163,Q1RMZ4,Q8TEA8,Q9HD33,Q8NAS5,P51398,P11310,Q6FGL4,Q5T4U4,P78557,P21953,Q96G65,…	1438	227	12782	3.87658	2.22542e-32	1.71186e-33	5.07818e-32
GOTERM_CC_FAT	GO:0044429~mitochondrial part	175	9.20084	4.86939e-35	Q9NUZ0,A4QPB4,Q8N5H5,O75964,Q8IXI2,Q53RX0,Q5H9R2,Q9NP81,P00167,A8K281,Q5T952,Q68DF1,Q6IAL5,Q53TX0,Q53S89,Q59F44,Q86TQ8,Q96K48,Q8TAS0,Q92934,Q9NSE4,Q16740,A8K290,P13073,Q04837,Q9HAN0,Q6NR85,Q2YDB7,Q16836,Q5HYG8,Q9P1A0,Q5HYG7,Q1L6K4,Q6TCH8,Q6LCA3,Q53T69,Q1L6K6,Q5U0M9,Q9UC85,Q8N163,Q1RMZ4,Q8TEA8,A8MV91,Q8NAS5,P51398,Q96L66,Q75KN0,Q05DN3,Q5T331,P14927,Q53T76,P21953,Q96G65,Q6IB06,Q75MN1,P06576,Q9H3I1,…	1438	595	12782	2.61433	3.18945e-32	2.27818e-33	7.27801e-32
GOTERM_CC_FAT	GO:0005740~mitochondrial envelope	107	5.62566	2.51516e-16	A8K512,A4QPB4,Q8N5H5,O75964,Q8IXI2,Q5H9R2,P00167,A8K281,Q5T952,Q68DF1,Q6IAL5,Q59F44,Q02978,Q96K48,Q8TAS0,Q92934,Q6PJX4,Q6TGM4,Q8NCF7,Q6LEN1,Q9UG93,P13073,Q53ET4,Q96KF9,Q8TAA5,O60313,Q2YDB7,Q16836,Q6P1Q8,Q5HYG8,Q9P1A0,Q3SY17,Q96AM7,Q1L6K4,P43155,Q53T69,O95140,Q1L6K6,Q5U0M9,Q9UC85,P04040,A8MV91,Q96L66,Q9P129,Q75KN0,Q05DN3,Q6TGM5,A4D1N4,Q9UJS0,Q4LE76,Q8NDD9,Q5T331,P14927,P42765,Q53T76,Q9HD23,Q8WU60,…	1438	419	12782	2.26992	1.45439e-13	5.21805e-15	3.33067e-13
Annotation Cluster 3	Enrichment Score: 36.30910004353807
Category	Term	Count	%	PValue	Genes	List Total	Pop Hits	Pop Total	Fold Enrichment	Bonferroni	Benjamini	FDR
SP_PIR_KEYWORDS	protein biosynthesis	123	6.46688	3.3474e-76	Q96CD8,Q49AJ9,Q5VVD0,Q9H8Z6,A8K517,Q9NP81,Q6NSH7,Q9NY44,P29692,P62753,P27635,Q0QEW2,Q53R85,Q7Z3T4,P62269,P62266,P47914,Q5HY50,P63220,Q53HM9,Q96GF2,Q86VC0,P62854,P23396,Q2F840,Q9H2I7,P62851,P68104,Q5JVH5,P49589,Q2F837,P49588,Q9NSE4,P41252,Q5VVC8,Q9BR63,Q04637,Q2F838,P54577,Q4VBZ6,P41250,Q53SI8,Q5VVC9,P78534,P20042,Q5T8U2,Q13347,Q8NI62,Q5T8U4,Q8TBW1,O43776,Q96B43,P49590,P62861,Q9BUV4,A8K094,Q59GP5,…	1895	188	19235	6.64095	2.12225e-73	5.30562e-74	4.98114e-73
GOTERM_CC_FAT	GO:0030529~ribonucleoprotein complex	207	10.8833	3.6701e-67	Q5VVD0,Q13573,P27635,Q9UEL2,A6NIT8,Q562S0,Q32Q20,A8K5C9,Q6PKI6,Q9BV64,Q05BI2,Q05CI5,Q53HM6,P47914,P63220,Q00839,Q86VC0,Q59ES8,A8K6F2,Q9BZZ5,Q5VVC8,Q5VVC9,Q32Q22,Q5T8U2,Q8NI62,Q8TBW1,Q5T8U4,A8K094,Q9BUV4,Q96BS4,Q59GP7,Q49A90,Q5TZP7,Q6FG96,Q7Z3D1,Q8IXG0,A2A3R6,Q9NP64,Q9NY85,Q5D0F6,A6NIR6,Q9BTA9,P51398,Q53GK6,Q05CK9,A7MD20,P84098,P57721,Q6P2Q9,Q53HK9,Q59H49,P51991,Q0VAC0,P83731,Q53XJ4,Q53GL6,P52756,…	1438	515	12782	3.57275	2.40392e-64	3.43417e-65	5.4855e-64
GOTERM_BP_FAT	GO:0006412~translation	154	8.09674	3.92575e-56	Q13765,Q5VVD0,Q9NP81,P27635,Q53R85,P47914,P63220,Q86VC0,Q53HM9,Q9H2I7,Q5VVC8,Q9NSE4,Q04637,Q9BR63,Q4VBZ6,P54577,Q5VVC9,Q5T8U2,Q8NI62,Q13347,Q8TBW1,Q5T8U4,A8K094,Q9BUV4,Q59GP5,Q9NSD9,Q49A90,Q6FG96,Q7Z3D1,A2A3R6,Q92905,Q9NY85,Q8TEA8,A6NIR6,P84098,Q5M7Z9,Q53HK9,Q5VTE0,Q6FG85,Q7Z5T5,P83731,Q53XJ6,O75879,Q53GL4,Q75MN1,P07814,Q8WVK4,Q9H5H1,P05198,Q9H7G6,P60228,Q3KQT6,Q07020,Q8N5L9,P61353,A8K4C8,Q3B770,…	1611	331	13528	3.90689	1.46077e-52	1.46077e-52	7.23851e-53
SP_PIR_KEYWORDS	ribonucleoprotein	120	6.30915	1.87009e-47	Q49AJ9,O60812,P36578,Q5VVD0,Q8WVW9,P62750,A8K517,Q9UEL2,P62753,Q642I1,P27635,A6NIT8,Q0QEW2,Q53F64,Q9BV64,P62269,O43390,P62266,P47914,Q5HY50,Q00839,P63220,Q59ES8,Q86VC0,P62854,P23396,P62851,O60506,Q2F832,Q9NYK5,Q5JVH5,Q5VVC8,Q8WTW0,Q5VVC9,Q8ND56,Q5T8U2,Q8NI62,Q5T8U4,Q8TBW1,P62861,Q9BUV4,A8K094,Q0VGD6,Q96BS4,Q3MIB7,Q49A90,Q6FG96,Q6NSF2,Q7Z3D1,A2A3R6,Q9NP64,Q9NY85,Q659G3,A6NIR6,Q9HD33,Q7KYM9,P62979,…	1895	279	19235	4.36576	1.18564e-44	1.31737e-45	2.78281e-44
GOTERM_BP_FAT	GO:0006414~translational elongation	75	3.94322	8.6217e-47	Q49AJ9,Q96CD8,P36578,Q5VVD0,A8K517,P62750,P29692,Q6NSH7,P27635,Q642I1,P62753,Q0QEW2,P62269,P62266,P47914,Q5HY50,P63220,Q86VC0,P62854,P23396,Q53HM9,Q2F840,P62851,Q9H2I7,P68104,Q5JVH5,Q2F837,Q5VVC8,Q4VBZ6,Q2F838,Q5VVC9,Q5T8U2,Q8NI62,Q8TBW1,Q5T8U4,P62861,Q9BUV4,A8K094,Q59GP5,Q49A90,Q6FG96,Q6NSF2,Q7Z3D1,Q96RE1,A2A3R6,Q9NY85,P62979,P62249,P84098,Q53HK9,P62244,Q5VTE0,P42766,P83731,P62987,P62988,P50914,…	1611	101	13528	6.2356	3.20813e-43	1.60407e-43	1.58971e-43
GOTERM_CC_FAT	GO:0022626~cytosolic ribosome	63	3.3123	7.46887e-43	Q49AJ9,P36578,Q5VVD0,A8K517,P62750,Q59GX9,Q6IRZ0,Q1HDT5,P27635,P62753,P08865,Q0QEW2,Q5MK14,A2RUM7,P62269,P61247,P62266,Q8J014,Q8WU07,P47914,Q5HY50,Q6NXQ8,P63220,P23396,P62854,Q86VC0,Q3MIH3,P62851,Q53HV1,Q9BT63,Q5JVH5,P49207,P39019,Q6IBT7,Q76N53,Q5VVC8,Q6J1Z9,Q6S4P3,Q76N56,Q5VVC9,Q5PY61,Q5T8U2,Q8NI62,Q5T8U4,Q8TBW1,P62861,A8K094,Q9BUV4,Q8TBK5,P61254,Q96T46,Q5T4L6,Q02878,Q8WYP1,Q6NXR8,Q96DV6,Q59GY2,…	1438	81	12782	6.91346	4.89211e-40	4.89211e-41	1.11633e-39
GOTERM_CC_FAT	GO:0044445~cytosolic part	85	4.46898	1.52212e-40	Q49AJ9,P36578,Q5VVD0,A8K517,P62750,Q2TU64,P27635,P62753,O15212,Q59GA5,Q0QEW2,A8MWI8,Q4TZM4,P62269,P62266,Q4TWB7,P47914,Q5HY50,P63220,P23396,Q86VC0,P62854,P62851,Q8IZI0,Q14473,Q14477,Q9BU08,Q5JVH5,Q6TGM4,Q5VVC8,Q6J1Z8,Q5VSR8,Q6J1Z9,Q5VSR7,Q6S4P3,Q5VVC9,Q6J1Z7,Q5T8U2,Q8NI62,Q8TBW1,Q5T8U4,P62861,Q9BUV4,A8K094,Q96T46,Q49A90,Q6FG96,P40227,Q7Z3D1,Q6NSF2,Q01813,A2A3R6,Q9NP64,Q9NY85,Q96GV1,P62249,P62979,…	1438	152	12782	4.97067	9.96992e-38	9.06356e-39	2.27504e-37
SP_PIR_KEYWORDS	ribosome	55	2.89169	5.10467e-39	Q49AJ9,P36578,Q5VVD0,A8K517,Q59GX9,Q6IRZ0,P27635,P62753,P08865,Q0QEW2,A2RUM7,P62269,P61247,Q8J014,P62266,Q8J015,P47914,Q5HY50,Q6NXQ8,P63220,P23396,P62854,Q86VC0,Q53H34,Q3MIH3,P62851,Q53HV1,Q9BT63,Q5JVH5,P39019,Q76N53,Q5VVC8,Q76N56,Q5VVC9,Q5PY61,Q5T8U2,Q8NI62,Q5T8U4,Q8TBW1,P62861,A8K094,Q9BUV4,Q8TBK5,Q0VGL3,P61254,Q5T4L6,Q02878,Q8WYP1,Q6NXR8,Q96DV6,Q59GY2,Q49A90,Q53HW2,P39023,Q6FG96,Q7Z3D1,Q6NSF2,…	1895	73	19235	7.64756	3.23636e-36	2.69697e-37	7.59607e-36
SP_PIR_KEYWORDS	ribosomal protein	83	4.36383	7.20932e-34	Q49AJ9,P36578,Q5VVD0,A8K517,P62750,Q642I1,P62753,P27635,Q0QEW2,P62269,P62266,P47914,Q5HY50,P63220,Q86VC0,P62854,P23396,P62851,Q9NYK5,Q5JVH5,Q5VVC8,Q5VVC9,Q5T8U2,Q8NI62,Q8TBW1,Q5T8U4,P62861,Q9BUV4,A8K094,Q49A90,Q6FG96,Q6NSF2,Q7Z3D1,A2A3R6,Q9NY85,Q9HD33,A6NIR6,P62979,P62249,P51398,P84098,Q5T1D1,Q53HK9,P62244,P42766,P83731,P62987,P62988,Q68CT7,Q9H3I1,P50914,P26373,P62847,Q3KQT6,Q9H2W6,Q07020,Q8N5L9,…	1895	188	19235	4.48129	4.57071e-31	3.04714e-32	1.07279e-30
GOTERM_CC_FAT	GO:0033279~ribosomal subunit	71	3.73291	1.45997e-33	Q49AJ9,P36578,Q5VVD0,A8K517,P62750,P62753,P27635,Q0QEW2,P62269,P62266,P47914,Q5HY50,P63220,Q86VC0,P62854,P23396,P62851,Q5JVH5,Q5VVC8,Q6J1Z9,Q5VVC9,Q6S4P3,Q5T8U2,Q8NI62,Q8TBW1,Q5T8U4,P62861,Q9BUV4,A8K094,Q96T46,Q49A90,Q6FG96,Q6NSF2,Q7Z3D1,A2A3R6,Q9NP64,Q9NY85,P62979,P62249,P51398,P84098,Q86YQ5,Q86YQ4,Q53HK9,P62244,Q86YQ1,Q9NX34,P42766,P83731,Q7Z6G4,P62987,P62988,Q68CT7,Q9H3I1,P50914,P62847,Q3KQT6,…	1438	128	12782	4.93047	9.56283e-31	6.37522e-32	2.18214e-30
GOTERM_CC_FAT	GO:0005840~ribosome	93	4.88959	1.00092e-32	Q49AJ9,P36578,Q5VVD0,A8K517,P62750,P27635,Q642I1,P62753,Q0QEW2,P62269,P62266,P47914,Q5HY50,P63220,Q86VC0,P62854,P23396,P62851,Q9NYK5,Q5JVH5,Q5VVC8,Q6J1Z9,Q5VVC9,Q6S4P3,Q5T8U2,Q8NI62,Q8TBW1,Q5T8U4,P62861,Q9BUV4,A8K094,Q96T46,Q49A90,Q5TZP7,Q6FG96,Q7Z3D1,Q6NSF2,A2A3R6,Q9NP64,Q9NY85,Q9HD33,A6NIR6,P62979,P62249,P51398,P84098,Q5T1D1,Q86YQ5,Q86YQ4,Q53HK9,P62244,Q86YQ1,Q9NX34,P42766,P83731,Q7Z6G4,P62987,…	1438	215	12782	3.84489	6.55604e-30	4.09753e-31	1.49602e-29
KEGG_PATHWAY	hsa03010:Ribosome	64	3.36488	1.92035e-32	Q49AJ9,P36578,Q5VVD0,P62750,A8K517,Q59GX9,Q6IRZ0,P27635,P62753,Q642I1,P08865,Q0QEW2,Q5MK14,A2RUM7,A1L400,P62269,P61247,Q8J014,P62266,Q8J015,P47914,Q5HY50,Q6NXQ8,Q5U0C0,P61313,P63220,P23396,P62854,Q86VC0,Q53H34,Q3MIH3,P62851,Q53HV1,Q9BT63,Q5JVH5,P49207,P39019,Q76N53,Q5VVC8,Q76N55,Q76N56,Q5VVC9,Q5T8U2,Q8NI62,P55795,Q5T8U4,Q8TBW1,P62861,A8K094,Q9BUV4,Q8TBK5,P61254,Q0VGL3,Q02878,Q5T4L6,Q8WYP1,Q6NXR8,…	808	87	5085	4.62957	3.2838e-30	3.2838e-30	2.34511e-29
GOTERM_MF_FAT	GO:0003735~structural constituent of ribosome	78	4.10095	2.07385e-27	Q49AJ9,P36578,Q5VVD0,A8K517,P62750,Q642I1,P62753,P27635,Q0QEW2,P62269,P62266,P47914,Q5HY50,P63220,Q86VC0,P62854,P23396,Q5JVH5,Q5VVC8,Q5VVC9,Q5T8U2,Q8NI62,Q8TBW1,Q5T8U4,P62861,Q9BUV4,A8K094,Q49A90,Q6FG96,Q6NSF2,Q7Z3D1,A2A3R6,Q9NY85,Q9HD33,A6NIR6,P62979,P62249,P84098,Q5T1D1,Q53HK9,P62244,P42766,P83731,P62987,P62988,Q9H3I1,P50914,P26373,P62847,Q3KQT6,Q07020,Q8N5L9,P61353,A8K4C8,Q6NSD1,Q53Z07,Q5VY36,…	1596	168	12983	3.77683	2.61927e-24	3.27409e-25	3.37407e-24
GOTERM_CC_FAT	GO:0022627~cytosolic small ribosomal subunit	32	1.68244	2.69724e-22	A8K517,Q1HDT5,P62753,P08865,P62269,P61247,Q8J014,P62266,Q8WU07,Q6NXQ8,P63220,Q86VC0,P62854,Q3MIH3,P23396,P62851,Q53HV1,Q5JVH5,Q6IBT7,P39019,Q6J1Z9,Q6S4P3,Q76N56,Q5PY61,Q8NI62,P62861,Q96T46,Q5T4L6,Q6NXR8,Q96DV6,Q49A90,Q7Z3D1,A2A3R6,Q9UFQ0,Q66K58,P62249,P62979,Q86YQ5,Q86YQ4,Q8WVC2,P62244,Q86YQ1,P62701,Q8WYN9,Q9BSW5,Q5SUJ3,Q8WYN8,Q5U5U6,Q7Z6G4,P62987,Q4FCH6,P62988,Q86WI9,P62847,Q3KQT6,P62277,P78461,…	1438	40	12782	7.11099	1.7667e-19	7.68128e-21	4.03142e-19
GOTERM_CC_FAT	GO:0015935~small ribosomal subunit	38	1.9979	8.68923e-20	A8K517,Q59GX8,Q1HDT5,P62753,P08865,Q8NBL6,P62269,P61247,Q8J014,P62266,Q8WU07,Q6NXQ8,P63220,P62854,Q3MIH3,Q86VC0,P23396,P62851,Q53HV1,Q5JVH5,Q6IBT7,P39019,Q6J1Z9,Q6S4P3,Q76N56,Q5PY61,Q8NI62,P62861,Q96T46,Q5T4L6,Q6NXR8,Q96DV6,P82933,Q49A90,Q7Z3D1,A2A3R6,Q66K58,Q9UFQ0,P62249,P62979,P51398,Q86YQ5,Q86YQ4,Q8WVC2,P62244,Q86YQ1,P62701,Q8WYN9,Q9NX34,Q9BSW5,Q5SUJ3,Q8WYN8,Q5U5U6,Q7Z6G4,P62987,Q4FCH6,Q68CT7,…	1438	63	12782	5.36146	5.69145e-17	2.37144e-18	1.29873e-16
GOTERM_CC_FAT	GO:0022625~cytosolic large ribosomal subunit	29	1.52471	3.07543e-19	Q49AJ9,Q6IPI1,P36578,Q5VVD0,P62750,Q45RF0,Q59GX9,Q3B7A4,Q6IRZ0,Q07020,P27635,A6NHB7,Q9BYF3,Q0QEW2,Q5MK14,Q3MHV2,A2RUM7,P62899,P62424,P47914,Q5HY50,Q9BT63,Q53G49,P49207,Q76N53,Q5VVC8,P61927,P62913,Q3KQU0,Q5VVC9,Q6IPH7,Q5T8U2,Q8TBW1,Q5T8U4,Q8N5Z7,Q9BUV4,A8K094,Q8TBK5,P61254,P62917,Q02878,Q8WYP1,Q9BQQ5,Q59GY2,Q53HW2,P39023,Q6FG96,P18124,Q6NSF2,P46776,P46777,Q9NP64,P46779,Q9NY85,P63173,Q9BY74,P84098,…	1438	38	12782	6.78351	2.01441e-16	7.74773e-18	4.59668e-16
GOTERM_CC_FAT	GO:0015934~large ribosomal subunit	34	1.78759	1.05234e-14	Q49AJ9,Q6IPI1,P36578,Q5VVD0,P62750,Q45RF0,Q59GX9,Q3B7A4,Q6IRZ0,Q07020,P27635,A6NHB7,Q9BYF3,Q0QEW2,Q5MK14,Q3MHV2,A2RUM7,P62899,Q5VY36,P62424,Q8J015,P47914,Q5HY50,Q53H34,Q5QTS3,Q9BT63,Q9BSQ6,Q53G49,P49207,Q76N53,Q5VVC8,P61927,P62913,Q3KQU0,Q5VVC9,P06748,Q6IPH7,Q5T8U2,Q8TBW1,Q9BYG9,Q5T8U4,Q8N5Z7,Q9BUV4,A8K094,Q8TBK5,Q0VGL3,P61254,P62917,Q02878,Q8WYP1,Q9BQQ5,Q59GY2,Q53HW2,P39023,Q6FG96,P18124,Q6NSF2,…	1438	67	12782	4.5107	6.90836e-12	2.09388e-13	1.57652e-11
GOTERM_MF_FAT	GO:0005198~structural molecule activity	146	7.67613	1.90108e-14	P07437,Q5VVD0,P27635,Q562S0,Q7Z794,Q562R8,P13645,P47914,P17661,P63220,Q86VC0,P14649,Q548L2,Q5VVC8,Q5I6Y6,Q5I6Y4,Q5VVC9,Q5I6Y5,Q5T8U2,Q8NI62,Q8TBW1,Q5T8U4,A8K094,Q9BUV4,Q9UPG3,Q59FP5,Q49A90,Q6FG96,Q7Z3D1,A2A3R6,P07951,Q9NY85,Q4VBY4,Q5H9P1,A6NIR6,Q53GK6,Q53QU3,Q562P0,P84098,Q53HK9,Q7Z5T5,P83731,Q96FU6,Q7Z757,Q8TC62,Q6UR97,Q6UR98,Q9H3I1,A6NJQ0,Q59GR8,Q45VM8,Q45VM7,Q3KQT6,Q45VM6,P60709,Q07020,Q8N5L9,…	1596	634	12983	1.87329	2.39778e-11	1.99818e-12	3.08864e-11
Annotation Cluster 4	Enrichment Score: 31.789463881604078
Category	Term	Count	%	PValue	Genes	List Total	Pop Hits	Pop Total	Fold Enrichment	Bonferroni	Benjamini	FDR
GOTERM_MF_FAT	GO:0000166~nucleotide binding	505	26.551	1.7461e-51	Q9NUZ0,A8K6G2,Q8IXI2,Q32Q15,Q32Q12,A1L4K2,Q6IAL5,A8K6G8,Q59ES8,Q8NBU5,Q59F49,Q96SB4,Q6AI22,Q13464,Q9NSE4,Q16740,A8MWZ0,Q9UGJ0,Q32Q22,Q7Z777,Q9NSD9,Q59F39,Q8TD98,P40227,Q5U0M9,Q4VBY6,Q9UC85,Q6UB35,Q53GK6,Q5ZEY3,A8K6E7,Q6FG89,Q7Z759,Q53GL6,Q53GL4,P06576,Q53GL5,Q16715,Q16716,Q49A78,P55084,Q86VD2,Q5T948,Q5CZ96,Q5T949,Q2L7G6,Q9NNW7,Q59EW3,A1XKG3,A8K6C0,Q96E92,A6NHL2,O95831,Q5T8P6,Q53GE9,P18085,Q9UIC5,…	1596	2245	12983	1.82986	2.20533e-48	1.10266e-48	2.84084e-48
SP_PIR_KEYWORDS	nucleotide-binding	358	18.8223	8.8518e-49	P07437,Q69FE1,A8K6G2,Q2TU64,Q8IXI2,Q53S90,Q32Q15,Q9UEL2,Q96GX3,Q32Q12,Q6NT82,Q59H21,A1L4K2,Q6IAL5,Q05CI5,A8K6G8,Q96Q15,Q00839,P22694,Q8NBU5,Q9H2I7,Q59F49,Q96Q11,Q96SB4,Q6AI22,Q9NSE4,Q13464,Q16740,A8MWZ0,Q7Z777,Q32Q22,Q6NW36,Q59GP5,Q9NSD9,Q96L91,Q59F39,Q8TD98,P40227,Q5U0M9,Q4VBY6,Q6UB35,Q5D0F6,Q53GK6,Q59GS3,Q5JPC4,Q5M7Z9,A8K6E7,Q5VTE0,Q6FG89,Q8TC62,Q7Z759,O75879,Q6UR97,P06576,Q6UR98,P07814,Q16715,…	1895	1686	19235	2.1553	5.61204e-46	8.0172e-47	1.3172e-45
SP_PIR_KEYWORDS	atp-binding	293	15.4048	7.46852e-43	Q69FE1,A8K6G2,Q2TU64,Q53S90,Q32Q15,Q9UEL2,Q32Q12,Q59H21,A1L4K2,Q05CI5,Q96Q15,Q00839,P22694,Q8NBU5,Q59F49,Q96Q11,Q96SB4,Q6AI22,Q9NSE4,Q13464,Q16740,A8MWZ0,Q7Z777,Q32Q22,Q6NW36,Q9NSD9,Q96L91,Q59F39,P40227,Q5U0M9,Q4VBY6,Q6UB35,Q5D0F6,Q53GK6,Q59GS3,Q5M7Z9,A8K6E7,Q6FG89,Q7Z759,O75879,P06576,P07814,Q16715,Q16716,Q49A78,Q6ZNL4,Q5CZ96,Q96E92,A1XKG3,Q5H9N4,A6NE90,Q8IXD6,Q8NHX6,Q68EN4,Q9HB23,Q8NI92,P21127,…	1895	1326	19235	2.24289	4.73504e-40	4.30458e-41	1.11136e-39
GOTERM_MF_FAT	GO:0017076~purine nucleotide binding	399	20.9779	6.71696e-31	P07437,Q69FE1,A8K6G2,Q2TU64,Q8IXI2,Q53S90,Q32Q15,Q9UEL2,Q96GX3,Q32Q12,Q59H21,Q6NT82,A1L4K2,Q6IAL5,Q05CI5,A8K6G8,Q96Q15,Q00839,P22694,Q59F49,Q9H2I7,Q8NBU5,Q96Q11,Q96SB4,Q6AI22,Q13464,Q9NSE4,Q16740,Q9UGJ0,A8MWZ0,Q32Q22,Q7Z777,Q6NW36,Q59GP5,Q9NSD9,Q96L91,Q59F39,Q8TD98,P40227,Q5U0M9,Q4VBY6,A8MV94,Q6UB35,Q5D0F6,Q53GK6,Q59GS3,Q5M7Z9,Q5JPC4,A8K6E7,Q5VTE0,Q6FG89,Q8TC62,Q7Z759,O75879,P06576,Q6UR97,P07814,…	1596	1918	12983	1.69226	8.48352e-28	2.82784e-28	1.09282e-27
GOTERM_MF_FAT	GO:0032555~purine ribonucleotide binding	382	20.0841	1.97801e-29	P07437,Q69FE1,A8K6G2,Q2TU64,Q8IXI2,Q53S90,Q32Q15,Q9UEL2,Q96GX3,Q32Q12,Q6NT82,Q59H21,A1L4K2,Q6IAL5,Q05CI5,A8K6G8,Q96Q15,Q00839,P22694,Q8NBU5,Q9H2I7,Q59F49,Q96Q11,Q96SB4,Q6AI22,Q9NSE4,Q13464,Q16740,A8MWZ0,Q9UGJ0,Q7Z777,Q32Q22,Q6NW36,Q59GP5,Q9NSD9,Q96L91,Q59F39,Q8TD98,P40227,Q5U0M9,Q4VBY6,Q6UB35,A8MV94,Q5D0F6,Q53GK6,Q59GS3,Q5JPC4,Q5M7Z9,A8K6E7,Q5VTE0,Q6FG89,Q8TC62,Q7Z759,O75879,Q6UR97,P06576,Q6UR98,…	1596	1836	12983	1.69252	2.49823e-26	6.24558e-27	3.21815e-26
GOTERM_MF_FAT	GO:0032553~ribonucleotide binding	382	20.0841	1.97801e-29	P07437,Q69FE1,A8K6G2,Q2TU64,Q8IXI2,Q53S90,Q32Q15,Q9UEL2,Q96GX3,Q32Q12,Q6NT82,Q59H21,A1L4K2,Q6IAL5,Q05CI5,A8K6G8,Q96Q15,Q00839,P22694,Q8NBU5,Q9H2I7,Q59F49,Q96Q11,Q96SB4,Q6AI22,Q9NSE4,Q13464,Q16740,A8MWZ0,Q9UGJ0,Q7Z777,Q32Q22,Q6NW36,Q59GP5,Q9NSD9,Q96L91,Q59F39,Q8TD98,P40227,Q5U0M9,Q4VBY6,Q6UB35,A8MV94,Q5D0F6,Q53GK6,Q59GS3,Q5JPC4,Q5M7Z9,A8K6E7,Q5VTE0,Q6FG89,Q8TC62,Q7Z759,O75879,Q6UR97,P06576,Q6UR98,…	1596	1836	12983	1.69252	2.49823e-26	6.24558e-27	3.21815e-26
GOTERM_MF_FAT	GO:0001882~nucleoside binding	346	18.1914	5.03679e-29	Q69FE1,A8K6G2,Q2TU64,Q53S90,Q32Q15,Q9UEL2,Q32Q12,Q59H21,A1L4K2,Q6IAL5,Q05CI5,Q96Q15,Q00839,P22694,Q8NBU5,Q59F49,Q96Q11,Q96SB4,Q6AI22,Q9NSE4,Q13464,Q16740,A8MWZ0,Q9UGJ0,Q7Z777,Q32Q22,Q6NW36,Q9NSD9,Q96L91,Q59F39,P40227,Q5U0M9,Q4VBY6,Q6UB35,A8MV94,Q5D0F6,Q53GK6,Q59GS3,Q5M7Z9,A8K6E7,Q6FG89,Q7Z755,Q7Z759,O75879,P06576,P07814,Q16715,Q16716,Q49A78,Q5T948,Q6ZNL4,Q5CZ96,Q5T949,Q9NNW7,Q2XN98,Q59EW3,Q96E92,…	1596	1612	12983	1.74604	6.36146e-26	1.27229e-26	8.19466e-26
GOTERM_MF_FAT	GO:0001883~purine nucleoside binding	343	18.0336	1.37536e-28	Q69FE1,A8K6G2,Q2TU64,Q53S90,Q32Q15,Q9UEL2,Q32Q12,Q59H21,A1L4K2,Q6IAL5,Q05CI5,Q96Q15,Q00839,P22694,Q8NBU5,Q59F49,Q96Q11,Q96SB4,Q6AI22,Q9NSE4,Q13464,Q16740,A8MWZ0,Q9UGJ0,Q7Z777,Q32Q22,Q6NW36,Q9NSD9,Q96L91,Q59F39,P40227,Q5U0M9,Q4VBY6,Q6UB35,A8MV94,Q5D0F6,Q53GK6,Q59GS3,Q5M7Z9,A8K6E7,Q6FG89,Q7Z759,O75879,P06576,P07814,Q16715,Q16716,Q49A78,Q5T948,Q6ZNL4,Q5CZ96,Q5T949,Q9NNW7,Q2XN98,Q59EW3,Q96E92,A1XKG3,…	1596	1601	12983	1.74279	1.73708e-25	2.89514e-26	2.23766e-25
GOTERM_MF_FAT	GO:0030554~adenyl nucleotide binding	339	17.8233	1.64605e-28	Q69FE1,A8K6G2,Q2TU64,Q53S90,Q32Q15,Q9UEL2,Q32Q12,Q59H21,A1L4K2,Q05CI5,Q96Q15,Q00839,P22694,Q8NBU5,Q59F49,Q96Q11,Q96SB4,Q6AI22,Q9NSE4,Q13464,Q16740,A8MWZ0,Q9UGJ0,Q7Z777,Q32Q22,Q6NW36,Q9NSD9,Q96L91,Q59F39,P40227,Q5U0M9,Q4VBY6,Q6UB35,A8MV94,Q5D0F6,Q53GK6,Q59GS3,Q5M7Z9,A8K6E7,Q6FG89,Q7Z759,O75879,P06576,P07814,Q16715,Q16716,Q49A78,Q5T948,Q6ZNL4,Q5CZ96,Q5T949,Q9NNW7,Q2XN98,Q59EW3,Q96E92,A1XKG3,Q5H9N4,…	1596	1577	12983	1.74868	2.07897e-25	2.96995e-26	2.67806e-25
GOTERM_MF_FAT	GO:0032559~adenyl ribonucleotide binding	322	16.9295	5.22237e-27	Q69FE1,A8K6G2,Q2TU64,Q53S90,Q32Q15,Q9UEL2,Q32Q12,Q59H21,A1L4K2,Q05CI5,Q96Q15,Q00839,P22694,Q8NBU5,Q59F49,Q96Q11,Q96SB4,Q6AI22,Q9NSE4,Q13464,Q16740,Q9UGJ0,A8MWZ0,Q7Z777,Q32Q22,Q6NW36,Q9NSD9,Q96L91,Q59F39,P40227,Q5U0M9,Q4VBY6,Q6UB35,A8MV94,Q5D0F6,Q53GK6,Q59GS3,Q5M7Z9,A8K6E7,Q6FG89,Q7Z759,O75879,P06576,P07814,Q16715,Q16716,Q49A78,Q5T948,Q6ZNL4,Q5CZ96,Q5T949,Q2XN98,Q59EW3,Q96E92,A1XKG3,Q5H9N4,A6NE90,…	1596	1497	12983	1.74975	6.59585e-24	7.32873e-25	8.49659e-24
GOTERM_MF_FAT	GO:0005524~ATP binding	317	16.6667	2.20544e-26	Q69FE1,A8K6G2,Q2TU64,Q53S90,Q32Q15,Q9UEL2,Q32Q12,Q59H21,A1L4K2,Q05CI5,Q96Q15,Q00839,P22694,Q8NBU5,Q59F49,Q96Q11,Q96SB4,Q6AI22,Q9NSE4,Q13464,Q16740,Q9UGJ0,A8MWZ0,Q7Z777,Q32Q22,Q6NW36,Q9NSD9,Q96L91,Q59F39,P40227,Q5U0M9,Q4VBY6,Q6UB35,A8MV94,Q5D0F6,Q53GK6,Q59GS3,Q5M7Z9,A8K6E7,Q6FG89,Q7Z759,O75879,P06576,P07814,Q16715,Q16716,Q49A78,Q5T948,Q6ZNL4,Q5CZ96,Q5T949,Q2XN98,Q59EW3,Q96E92,A1XKG3,Q5H9N4,A6NE90,…	1596	1477	12983	1.74591	2.78547e-23	2.78547e-24	3.58816e-23
UP_SEQ_FEATURE	nucleotide phosphate-binding region:ATP	180	9.46372	8.43509e-18	Q9ULG1,Q69FE1,O75351,A8K6G2,Q96G51,P13984,Q53S90,A8K9B9,Q9NP81,Q32Q15,Q9UEL2,Q9NTJ3,Q53SW9,Q6PIA4,Q59H21,A8K5C9,A1L4K2,Q59FQ9,Q05CI5,Q6VBB7,Q00839,P22694,Q59F49,Q8NBU5,Q96SB4,Q2YDC5,Q6AI22,Q13464,Q8IYH0,A8MWZ0,Q7Z777,Q32Q22,Q6NW36,O95786,Q96L91,Q59F39,Q4VBY6,Q6UB35,Q53T61,Q5D0F6,Q8NAR9,Q0ZAI9,Q9NRH2,Q2VIQ3,A8K6E7,Q2I0Y7,P07205,Q53XJ6,P06576,Q75MN1,P07814,Q49A78,Q7Z5U1,Q16854,Q6ZNL4,Q9H7G2,Q504U4,…	1886	962	19113	1.8962	3.58323e-14	8.95807e-15	1.5777e-14
Annotation Cluster 5	Enrichment Score: 29.259563691234202
Category	Term	Count	%	PValue	Genes	List Total	Pop Hits	Pop Total	Fold Enrichment	Bonferroni	Benjamini	FDR
GOTERM_BP_FAT	GO:0006396~RNA processing	179	9.41115	3.36472e-39	Q5VVD0,A8K2Z6,Q13573,P13984,Q86YB5,Q9UEL2,A6NIT8,Q32Q20,A8K5C9,Q6PKI6,Q05BI2,Q05CI5,Q9BV64,Q53HM6,Q6P441,Q59F45,A8K086,Q00839,Q59ES8,Q96Q11,Q96SB4,Q96SB3,Q6PJF7,Q5VVC8,Q5VVC9,A6NJ44,Q32Q22,Q9BUV4,Q9BUV3,P67775,Q96BS4,Q7Z3D1,Q8IXG0,A2A3R6,Q96FV9,Q5D0F6,Q05CK9,O15091,O95758,Q86UA1,Q6P2Q9,Q59H49,Q7Z3D7,Q5HYH5,P51991,Q0VAC0,Q53XJ4,P52756,Q53GL6,Q64I72,Q13435,Q53GL4,Q64I73,Q6PKH5,Q68DG4,A8MZ91,A6NI21,…	1611	547	13528	2.74792	1.25201e-35	4.17338e-36	6.20406e-36
SP_PIR_KEYWORDS	mrna splicing	92	4.83701	2.20163e-37	O60306,Q13573,A6NKB9,Q4ZG51,Q9UEL2,P23246,A8K5C9,Q14331,Q32Q20,Q6PKI6,Q9BV64,Q05BI2,O43390,Q53HM6,Q6P441,A8K086,Q00839,Q8TEQ6,Q59ES8,O60506,Q96SB4,Q7KZ24,Q6PJF7,Q564D3,Q9BWJ5,Q0VGD6,A8K9T4,Q3MIB7,Q15459,Q7Z2V5,Q8IXG0,Q96FV9,Q5D0F6,Q7KYM9,A8K1I6,Q9BUQ0,Q05CK9,Q86UA1,Q5JY65,Q6P2Q9,Q59H49,Q7Z3D7,Q9NWR1,Q08AL2,P26368,P51991,Q0VAC0,O95232,Q13838,P52756,Q53GL6,Q13435,Q64I72,Q6PKH5,Q64I73,Q4W5J5,Q68DG4,…	1895	209	19235	4.46812	1.39583e-34	1.07372e-35	3.27616e-34
SP_PIR_KEYWORDS	mrna processing	102	5.36278	3.73987e-36	Q9UK59,O60306,Q13573,A6NKB9,Q4ZG51,Q9UEL2,P23246,Q32Q20,Q14331,A8K5C9,Q6PKI6,Q05BI2,Q9BV64,O43390,Q53HM6,Q6P441,A8K086,Q8TEQ6,Q00839,Q59ES8,O60506,Q96SB4,Q7KZ24,Q6PJF7,Q564D3,Q7Z3R6,Q9BWJ5,Q0VGD6,A8K9T4,Q3MIB7,Q15459,Q7Z2V5,Q8IXG0,Q96FV9,Q5D0F6,Q7KYM9,A8K1I6,Q05CK9,Q9BUQ0,Q86UA1,Q5JY65,Q6P2Q9,Q59H49,Q7Z3D7,Q5HYH5,Q9NWR1,Q08AL2,P26368,P51991,Q0VAC0,O95232,Q13838,P52756,Q53GL6,Q64I72,Q13435,Q64I73,…	1895	260	19235	3.98208	2.37108e-33	1.69363e-34	5.56516e-33
GOTERM_BP_FAT	GO:0008380~RNA splicing	115	6.04627	1.043e-34	Q9UK59,O60306,Q13573,P13984,A6NKB9,Q4ZG51,Q9UEL2,A6NIT8,P23246,Q32Q20,A8K5C9,Q14331,Q6PKI6,Q05BI2,Q05CI5,Q9BV64,O43390,Q53HM6,Q6P441,A8K086,Q8TEQ6,Q00839,Q59ES8,O60506,Q7KZ24,Q96SB4,Q96SB3,Q6PJF7,Q564D3,Q9BWJ5,Q32Q22,Q0VGD6,P67775,A8K9T4,Q3MIB7,Q15459,Q7Z2V5,Q8IXG0,Q96FV9,Q5D0F6,Q7KYM9,A8K1I6,Q05CK9,Q9BUQ0,Q86UA1,Q5JY65,Q6P2Q9,Q59H49,Q7Z3D7,Q96B17,Q5HYH5,Q9NWR1,Q08AL2,Q59HD4,P26368,P51991,Q0VAC0,…	1611	284	13528	3.4003	3.881e-31	7.762e-32	1.92314e-31
GOTERM_BP_FAT	GO:0016071~mRNA metabolic process	133	6.99264	9.75758e-34	Q9UK59,O60306,Q13573,P13984,A6NKB9,Q4ZG51,Q9UEL2,A6NIT8,P23246,Q32Q20,A8K5C9,Q14331,Q6PKI6,Q05BI2,Q05CI5,Q9BV64,O43390,Q53HM6,Q6P441,A8K086,Q96Q15,Q00839,Q8TEQ6,Q59ES8,Q96GF2,O60506,Q2F832,Q7KZ24,Q96SB4,Q6PJF7,Q564D3,Q7Z3R6,Q9BWJ5,Q32Q22,Q0VGD6,A8K9T4,Q3MIB7,Q15459,Q8NC51,Q7Z2V5,Q8IXG0,Q96FV9,Q5D0F6,Q7KYM9,Q5VX58,A8K1I6,Q05CK9,Q9BUQ0,O95758,Q86UA1,Q5JY65,P57721,Q6P2Q9,Q59H49,Q7Z3D7,Q5HYH5,Q9NWR1,…	1611	370	13528	3.01848	3.63079e-30	6.05132e-31	1.79915e-30
GOTERM_BP_FAT	GO:0006397~mRNA processing	121	6.36172	5.84085e-33	Q9UK59,O60306,Q13573,P13984,A6NKB9,Q4ZG51,Q9UEL2,A6NIT8,P23246,Q32Q20,A8K5C9,Q14331,Q6PKI6,Q05BI2,Q05CI5,Q9BV64,O43390,Q53HM6,Q6P441,A8K086,Q8TEQ6,Q00839,Q59ES8,O60506,Q7KZ24,Q96SB4,Q6PJF7,Q564D3,Q7Z3R6,Q9BWJ5,Q32Q22,Q0VGD6,A8K9T4,Q3MIB7,Q15459,Q7Z2V5,Q8IXG0,Q96FV9,Q5D0F6,Q7KYM9,A8K1I6,Q05CK9,Q9BUQ0,O95758,Q86UA1,Q5JY65,Q6P2Q9,Q59H49,Q7Z3D7,Q5HYH5,Q9NWR1,Q08AL2,Q59HD4,P26368,P51991,Q0VAC0,O95232,…	1611	321	13528	3.16533	2.17338e-29	3.10483e-30	1.07697e-29
KEGG_PATHWAY	hsa03040:Spliceosome	73	3.83807	5.34945e-27	O60306,Q13573,Q4ZG51,Q9UEL2,Q32Q20,P11142,Q6P441,Q53HM6,Q96BE0,A8K086,Q00839,Q59ES8,Q564D3,Q8IWX8,Q9BWJ5,Q9UKV3,A8K9T4,Q3MIB7,Q15459,Q7Z2V5,Q8IXG0,P41223,Q96FV9,Q7KYM9,Q5JY65,Q6P2Q9,P26368,P51991,Q0VAC0,Q53GZ6,Q13838,Q13435,Q64I72,Q64I73,Q4W5J5,Q01130,Q5HYT6,Q09161,Q7L4T5,Q53G61,Q8TCM5,Q5STA2,Q6P151,Q5STA0,Q7Z497,Q6IAP9,Q9ULR0,P09651,Q9HCS7,P52298,Q05C41,Q53TM1,Q6I9S2,Q07955,Q66K91,P62312,Q9Y3B4,…	808	126	5085	3.64613	9.14756e-25	4.57378e-25	6.5327e-24
GOTERM_BP_FAT	GO:0000398~nuclear mRNA splicing, via spliceosome	69	3.62776	3.48259e-24	Q9UK59,P13984,Q13573,Q9UEL2,A6NIT8,Q32Q20,Q6PKI6,Q05CI5,Q9BV64,O43390,Q53HM6,A8K086,Q8TEQ6,Q00839,Q59ES8,Q7KZ24,Q6PJF7,Q564D3,Q9BWJ5,Q32Q22,Q0VGD6,A8K9T4,Q3MIB7,Q15459,Q8IXG0,Q7KYM9,Q9BUQ0,Q5JY65,Q6P2Q9,Q59H49,Q5HYH5,Q59HD4,P26368,P51991,Q0VAC0,Q13838,P52756,Q13435,Q68DG4,A8MZ91,Q59H38,Q01130,Q5HYT6,O14744,Q09161,Q2L7G6,Q7L4T5,Q53G61,P31943,Q8TCM5,Q5STA2,Q6P151,Q5STA0,Q7Z497,Q68EN4,Q8NI96,Q6IAP9,…	1611	153	13528	3.787	1.29587e-20	1.29587e-21	6.42138e-21
GOTERM_BP_FAT	GO:0000375~RNA splicing, via transesterification reactions	69	3.62776	3.48259e-24	Q9UK59,P13984,Q13573,Q9UEL2,A6NIT8,Q32Q20,Q6PKI6,Q05CI5,Q9BV64,O43390,Q53HM6,A8K086,Q8TEQ6,Q00839,Q59ES8,Q7KZ24,Q6PJF7,Q564D3,Q9BWJ5,Q32Q22,Q0VGD6,A8K9T4,Q3MIB7,Q15459,Q8IXG0,Q7KYM9,Q9BUQ0,Q5JY65,Q6P2Q9,Q59H49,Q5HYH5,Q59HD4,P26368,P51991,Q0VAC0,Q13838,P52756,Q13435,Q68DG4,A8MZ91,Q59H38,Q01130,Q5HYT6,O14744,Q09161,Q2L7G6,Q7L4T5,Q53G61,P31943,Q8TCM5,Q5STA2,Q6P151,Q5STA0,Q7Z497,Q68EN4,Q8NI96,Q6IAP9,…	1611	153	13528	3.787	1.29587e-20	1.29587e-21	6.42138e-21
GOTERM_BP_FAT	GO:0000377~RNA splicing, via transesterification reactions with bulged adenosine as nucleophile	69	3.62776	3.48259e-24	Q9UK59,P13984,Q13573,Q9UEL2,A6NIT8,Q32Q20,Q6PKI6,Q05CI5,Q9BV64,O43390,Q53HM6,A8K086,Q8TEQ6,Q00839,Q59ES8,Q7KZ24,Q6PJF7,Q564D3,Q9BWJ5,Q32Q22,Q0VGD6,A8K9T4,Q3MIB7,Q15459,Q8IXG0,Q7KYM9,Q9BUQ0,Q5JY65,Q6P2Q9,Q59H49,Q5HYH5,Q59HD4,P26368,P51991,Q0VAC0,Q13838,P52756,Q13435,Q68DG4,A8MZ91,Q59H38,Q01130,Q5HYT6,O14744,Q09161,Q2L7G6,Q7L4T5,Q53G61,P31943,Q8TCM5,Q5STA2,Q6P151,Q5STA0,Q7Z497,Q68EN4,Q8NI96,Q6IAP9,…	1611	153	13528	3.787	1.29587e-20	1.29587e-21	6.42138e-21
SP_PIR_KEYWORDS	Spliceosome	55	2.89169	1.47586e-23	P52597,Q68CN2,O60306,Q13573,Q9UQ39,A6NKB9,A8K4Z8,Q9UEL2,Q9UQ35,Q32Q20,A8K5C9,A6NDM5,Q14331,Q59G92,Q9P172,Q8N8Y7,Q05BI2,Q9BV64,Q5ZF01,O43390,Q53HM6,Q00839,Q8TEQ6,Q59ES8,O60506,Q5W009,P22626,Q8IYB3,A0JLT9,P17844,Q6NZY0,Q05CV9,Q9BWJ5,Q96HC5,P11940,Q9UKM9,Q0VGD6,Q5W010,A8K9T4,Q5W011,Q3MIB7,Q15459,Q5XPV6,P38159,Q0D2M5,Q7Z2V5,Q8IXG0,Q9ULA6,Q66K53,Q69YP1,Q5D0F6,Q7KYM9,Q05CK9,Q32P51,Q5JY65,Q6P2Q9,P26368,…	1895	120	19235	4.65226	9.35694e-21	4.9247e-22	2.19617e-20
GOTERM_CC_FAT	GO:0005681~spliceosome	60	3.15457	1.39806e-22	P52597,Q68CN2,O60306,Q13573,Q9UQ39,A6NKB9,A8K4Z8,Q9UEL2,Q9UQ35,Q32Q20,A8K5C9,A6NDM5,Q14331,Q59G92,Q9P172,Q8N8Y7,Q05BI2,Q9BV64,Q5ZF01,O43390,Q53HM6,Q00839,Q8TEQ6,Q59ES8,O60506,Q5W009,Q53HE7,P22626,Q9BZZ5,Q8IYB3,A0JLT9,P17844,Q6NZY0,Q05CV9,Q9BWJ5,Q96HC5,P11940,Q9UKM9,Q0VGD6,A8K9T4,Q5W010,Q5W011,A8K2A9,Q3MIB7,Q15459,Q5XPV6,P38159,Q0D2M5,Q7Z2V5,Q8IXG0,Q9ULA6,Q66K53,Q69YP1,Q5D0F6,Q7KYM9,Q9BTA9,Q05CK9,…	1438	132	12782	4.04033	9.15727e-20	4.1624e-21	2.0896e-19
Annotation Cluster 6	Enrichment Score: 28.649129993894856
Category	Term	Count	%	PValue	Genes	List Total	Pop Hits	Pop Total	Fold Enrichment	Bonferroni	Benjamini	FDR
GOTERM_CC_FAT	GO:0005694~chromosome	151	7.93901	3.82765e-36	Q6DRA9,Q32Q15,Q68DE9,A2RUU6,Q9NTJ3,Q6TXQ4,A8K5C9,Q05BI0,Q92922,A7E2X7,Q69YZ5,Q5JPE5,Q9NTI5,Q0VAE4,O95983,Q92522,A6NJ42,Q6MZP3,P67775,Q6MZP7,Q59G12,Q59F36,P55854,O75478,Q53XI7,Q8NAR9,Q5D0F6,A8K5E3,A8K6E7,Q6IPL9,Q53HK8,A4D177,Q2I0Y7,O15347,Q6LCB2,Q6AI02,Q8TAQ2,Q6FG89,Q99549,Q8TC62,Q9NRG0,Q6IT96,A8K0U9,Q8WVK4,A8K5D7,P26583,Q86WG4,P60228,Q76L81,Q6I9T8,Q71UI9,Q2XN98,Q504U6,Q9HDC8,A3KPC7,Q6MZM3,Q13523,…	1438	460	12782	2.91782	2.50711e-33	2.08926e-34	5.72099e-33
GOTERM_BP_FAT	GO:0051276~chromosome organization	161	8.46477	4.85278e-36	Q6DRA9,A4QPB4,Q9ULG1,Q92925,Q32Q15,A2RUU6,Q99414,Q9NTJ3,Q6PIA1,Q5H924,Q6TXQ4,Q05BI0,Q5CZ83,Q92922,Q0EF63,Q0EF62,Q6VBB7,Q5JPE5,Q8NC65,Q9Y4A5,Q9NTI5,Q0VAE4,Q8TBS8,Q01105,O95983,Q92522,A6NJ42,Q59FP7,Q17RB6,Q96L91,Q8TD98,Q1L6K4,Q8IWJ0,O75478,Q1L6K6,O75376,Q53XI7,Q8NAR9,A8K5E3,Q0ZAI9,A8K6E7,Q6IPL9,A4D177,Q0VF46,A8K6E5,Q57Z54,Q5JNZ9,Q969X9,Q8TAQ2,Q6FG89,Q99549,Q9NRG0,Q6IT96,A8K0U9,Q75MN6,A8K5D7,P26583,…	1611	485	13528	2.78755	1.80572e-32	4.5143e-33	8.94781e-33
GOTERM_CC_FAT	GO:0044427~chromosomal part	125	6.57203	2.98806e-29	Q6DRA9,Q32Q15,P43034,Q68DE9,Q96QC0,A2RUU6,Q3SWU9,Q05BV1,Q9NTJ3,A7E2B5,Q9H7Z6,Q7Z2X1,Q6TXQ4,Q09028,Q05BI0,A6NGM0,Q92922,Q2XSC7,Q69YZ5,Q5JPE5,Q9NTI5,Q0VAE4,Q05BW5,Q6NSG3,Q00577,Q99879,Q99878,Q6NSG7,O95983,A7E2C4,Q92522,Q6FI35,Q99880,Q8NDF0,A6NJ42,Q6MZP3,Q9BSK3,P67775,Q59G12,Q59F36,P55854,Q92794,Q19RW5,Q5SWC8,Q92793,Q53XI7,Q8NAR9,A8K5E3,O43264,Q5SWC6,Q0Z7V0,A8K6E7,Q53HK8,Q6IPL9,A4D177,Q68DW7,Q2I0Y7,…	1438	386	12782	2.87848	1.95718e-26	1.15128e-27	4.46609e-26
GOTERM_CC_FAT	GO:0000785~chromatin	80	4.2061	1.73755e-25	Q6DRA9,Q68DE9,Q96QC0,A2RUU6,Q3SWU9,Q9H7Z6,Q6TXQ4,Q05BI0,Q09028,A6NGM0,Q92922,Q69YZ5,Q5JPE5,Q0VAE4,Q9NTI5,Q05BW5,Q99879,Q99878,Q6NSG7,O95983,Q92522,Q99880,Q8NDF0,Q6MZP3,Q59G12,Q92794,Q5SWC8,Q8NAR9,A8K5E3,Q5SWC6,Q6IPL9,A4D177,Q68DW7,Q2I0Y7,Q6AI02,A8MSG9,Q8TAQ2,Q29RF7,Q14839,Q9UNS1,Q6LC06,Q99549,Q6IT96,A7E2E1,A8K0U9,Q6FI13,A8K5D7,Q8WVK4,Q5T6U9,Q5T6U8,P60228,Q86WG4,Q76L81,Q71UI9,Q96KK5,Q0VAS5,A3KPC7,…	1438	200	12782	3.55549	1.13809e-22	5.98996e-24	2.59701e-22
GOTERM_BP_FAT	GO:0006333~chromatin assembly or disassembly	57	2.99685	5.88981e-20	Q6DRA9,A8K4Z1,Q59EJ8,Q69YR9,Q86UJ6,A2RUU6,P0C0S8,Q9H7Z6,P10412,Q6TXQ4,P0C0S5,Q5VXV2,Q5VXV3,Q05BI0,Q4W5G3,P49711,Q92922,Q5JPE5,Q6FGB8,Q01105,Q05BW5,Q99879,Q99878,Q92522,Q99880,Q8NDF0,P16403,P55209,Q4W5H1,P16402,P16401,A8K4I2,A3R0T8,Q92794,Q02539,Q5SWC8,Q53XI7,Q8NAR9,Q5SWC6,P84243,Q0VGA3,A6NFS4,P49736,Q6IPL9,A4D177,Q9NX34,Q5SSJ6,Q9UIG0,Q8TAQ2,Q14839,Q2TAZ1,Q6P1K4,Q05DG0,Q92993,O60264,Q99549,Q96T23,…	1611	127	13528	3.76885	2.1916e-16	1.56543e-17	1.086e-16
Annotation Cluster 7	Enrichment Score: 27.922507977636624
Category	Term	Count	%	PValue	Genes	List Total	Pop Hits	Pop Total	Fold Enrichment	Bonferroni	Benjamini	FDR
SP_PIR_KEYWORDS	isopeptide bond	109	5.73081	2.34126e-32	Q6DRA9,P07437,O60610,Q709C8,P27635,A2RUU6,Q32Q12,P07737,Q6LC01,Q5VXV2,Q09028,Q5VXV3,Q6PKI6,Q6IAL5,P49792,Q2HIX7,P47914,Q9UJU2,Q2XSC7,Q5HY50,A6NN54,Q5T2B5,P23396,Q6FHQ0,Q5T2B7,Q8NBU5,O60506,Q7KZ24,Q6PK95,Q5VZU8,Q14814,Q01105,Q99569,Q99879,Q99878,Q5VZU9,Q6FI35,Q5T9U5,Q99880,Q02078,Q13347,Q5T9U4,P09493,A6NJ42,Q5T9U6,Q9UKV3,Q6NW36,Q9BSK3,Q8TCG4,O60315,Q3MIB7,Q49A90,Q8TD98,Q659G9,P55854,Q5U0M2,Q96IL1,…	1895	319	19235	3.46832	1.48436e-29	9.27723e-31	3.48394e-29
UP_SEQ_FEATURE	cross-link:Glycyl lysine isopeptide (Lys-Gly) (interchain with G-Cter in ubiquitin)	78	4.10095	1.13202e-27	P07437,O60610,Q709C8,P27635,A2RUU6,Q32Q12,P07737,Q6LC01,Q5VXV2,Q09028,Q5VXV3,Q6PKI6,Q6IAL5,P47914,Q2HIX7,Q5HY50,Q2XSC7,A6NN54,P23396,Q6FHQ0,Q8NBU5,O60506,Q7KZ24,Q5VZU8,Q01105,Q99569,Q99879,Q99878,Q5VZU9,Q6FI35,Q13347,Q99880,P09493,A6NJ42,Q9UKV3,Q6NW36,Q8TCG4,Q49A90,Q8TD98,Q96IL1,Q19RW5,Q6FGK3,Q5M7Z1,P62979,Q05CK9,Q5SU16,Q5M7Z9,Q8NC87,Q9UCI1,Q5JNZ9,Q9UCI2,Q8NFC6,Q7Z759,P62987,P62988,A8K0U9,Q6FI13,…	1886	199	19113	3.97218	4.8088e-24	1.60293e-24	2.11732e-24
SP_PIR_KEYWORDS	ubl conjugation	145	7.62355	6.44428e-26	Q6DRA9,P07437,P27635,A2RUU6,Q32Q12,P07737,Q6TXQ4,Q6IAL5,Q6PKI6,P47914,A7E2X7,Q5THS4,Q59ES8,Q8NBU5,Q01105,Q99569,Q99426,Q6FGY5,Q5T9U5,Q5T9U4,Q13347,Q02078,P14635,A6NJ42,Q5T9U6,Q9NRI2,Q6NW36,Q59FP7,O95786,Q6NR85,Q49A90,Q5TZP9,Q59F36,Q8TD98,P55854,Q5U0M2,O75376,Q53XI7,Q5M7Z1,Q05CK9,Q5M7Z9,Q8NC87,Q5JNZ9,Q6LCB2,Q0VAC0,P14921,Q7Z759,Q6IT96,A8K0U9,Q59EP7,Q59GR8,O75155,Q71UI9,Q2XN98,Q2TAM5,P35221,A3KPC7,…	1895	588	19235	2.50307	4.08568e-23	2.40334e-24	9.5895e-23
Annotation Cluster 8	Enrichment Score: 21.378089711264362
Category	Term	Count	%	PValue	Genes	List Total	Pop Hits	Pop Total	Fold Enrichment	Bonferroni	Benjamini	FDR
SP_PIR_KEYWORDS	mitochondrion	217	11.409	6.56491e-43	A4QPB4,Q9NUZ0,Q8N5H5,O75964,A8K2Z6,Q8IXI2,Q53RX0,Q5H9R2,Q9NP81,Q86YB5,P27635,Q5T952,Q7L124,Q6IAL5,Q53TX0,Q53S89,Q9BV61,Q86TQ8,Q96Q11,Q96K48,P13995,Q92934,Q8TAS0,Q9NSE4,Q16740,A8K290,P13073,Q04837,P14317,Q9HAN0,Q2YDB7,Q16836,Q5HYG8,Q9P1A0,Q5HYG7,Q6TCH8,Q1L6K4,Q6LCA3,Q53T69,A4D0W4,Q1L6K6,Q5U0M9,Q6UB35,Q1RMZ4,Q8TEA8,Q8NAS5,P51398,O15091,P22307,Q75KN0,Q86UA3,Q05DN3,Q13584,Q5T331,P14927,Q53T76,P21953,…	1895	832	19235	2.6474	4.16215e-40	4.16215e-41	9.769e-40
GOTERM_CC_FAT	GO:0044429~mitochondrial part	175	9.20084	4.86939e-35	Q9NUZ0,A4QPB4,Q8N5H5,O75964,Q8IXI2,Q53RX0,Q5H9R2,Q9NP81,P00167,A8K281,Q5T952,Q68DF1,Q6IAL5,Q53TX0,Q53S89,Q59F44,Q86TQ8,Q96K48,Q8TAS0,Q92934,Q9NSE4,Q16740,A8K290,P13073,Q04837,Q9HAN0,Q6NR85,Q2YDB7,Q16836,Q5HYG8,Q9P1A0,Q5HYG7,Q1L6K4,Q6TCH8,Q6LCA3,Q53T69,Q1L6K6,Q5U0M9,Q9UC85,Q8N163,Q1RMZ4,Q8TEA8,A8MV91,Q8NAS5,P51398,Q96L66,Q75KN0,Q05DN3,Q5T331,P14927,Q53T76,P21953,Q96G65,Q6IB06,Q75MN1,P06576,Q9H3I1,…	1438	595	12782	2.61433	3.18945e-32	2.27818e-33	7.27801e-32
GOTERM_CC_FAT	GO:0031967~organelle envelope	159	8.35962	1.26942e-24	A4QPB4,Q8N5H5,O75964,Q8IXI2,Q5H9R2,P00167,Q53R94,A8K281,Q5T952,Q68DF1,Q6IAL5,Q59FQ9,Q8WXH0,Q59F44,Q59F45,Q53HM8,Q96K48,Q8TAS0,Q92934,Q5I6Y6,Q5I6Y4,Q5I6Y5,P13073,Q6MZP0,Q53SY1,Q2YDB7,Q16836,Q59G12,Q5HYG8,Q9P1A0,Q3KQZ0,Q1L6K4,Q53T69,Q1L6K6,Q5U0M9,Q9UC85,A8MV91,Q96L66,Q75KN0,A4D177,Q05DN3,Q5T331,P14927,Q53T76,Q4VBX7,Q86XD3,Q6IB06,P06576,P55084,Q59EP7,Q16718,Q59EP1,Q6IPN0,Q9BPW8,Q7Z743,Q504U6,Q9HDC8,…	1438	620	12782	2.27953	8.31469e-22	4.15735e-23	1.89733e-21
GOTERM_CC_FAT	GO:0031975~envelope	159	8.35962	1.82756e-24	A4QPB4,Q8N5H5,O75964,Q8IXI2,Q5H9R2,P00167,Q53R94,A8K281,Q5T952,Q68DF1,Q6IAL5,Q59FQ9,Q8WXH0,Q59F44,Q59F45,Q53HM8,Q96K48,Q8TAS0,Q92934,Q5I6Y6,Q5I6Y4,Q5I6Y5,P13073,Q6MZP0,Q53SY1,Q2YDB7,Q16836,Q59G12,Q5HYG8,Q9P1A0,Q3KQZ0,Q1L6K4,Q53T69,Q1L6K6,Q5U0M9,Q9UC85,A8MV91,Q96L66,Q75KN0,A4D177,Q05DN3,Q5T331,P14927,Q53T76,Q4VBX7,Q86XD3,Q6IB06,P06576,P55084,Q59EP7,Q16718,Q59EP1,Q6IPN0,Q9BPW8,Q7Z743,Q504U6,Q9HDC8,…	1438	622	12782	2.2722	1.19705e-21	5.70024e-23	2.73155e-21
GOTERM_CC_FAT	GO:0019866~organelle inner membrane	95	4.99474	1.64866e-18	A8K512,Q8N5H5,O75964,Q5H9R2,A8K281,Q5T952,Q68DF1,Q6IAL5,Q59F45,Q02978,Q8TAS0,Q6PJX4,Q6TGM4,Q5I6Y6,Q5I6Y4,Q5I6Y5,Q8NCF7,Q6FI35,Q6LEN1,P13073,Q03252,Q9UG93,Q53ET4,Q96KF9,O60313,Q8TAA5,Q2YDB7,Q16836,Q5HYG8,Q6P1Q8,Q9P1A0,Q3SY17,Q96AM7,P43155,Q53T69,Q5U0M9,Q96L66,Q9P129,A4D177,Q9UJS0,Q6TGM5,Q05DN3,A4D1N4,Q5T331,P14927,P42765,Q53T76,Q8WU60,Q9HD23,Q7GY08,Q6IB06,Q6FHP5,P06576,P55084,Q59EP7,Q16718,A2RUF3,…	1438	329	12782	2.56666	1.07987e-15	3.99953e-17	2.46416e-15
GOTERM_CC_FAT	GO:0005740~mitochondrial envelope	107	5.62566	2.51516e-16	A8K512,A4QPB4,Q8N5H5,O75964,Q8IXI2,Q5H9R2,P00167,A8K281,Q5T952,Q68DF1,Q6IAL5,Q59F44,Q02978,Q96K48,Q8TAS0,Q92934,Q6PJX4,Q6TGM4,Q8NCF7,Q6LEN1,Q9UG93,P13073,Q53ET4,Q96KF9,Q8TAA5,O60313,Q2YDB7,Q16836,Q6P1Q8,Q5HYG8,Q9P1A0,Q3SY17,Q96AM7,Q1L6K4,P43155,Q53T69,O95140,Q1L6K6,Q5U0M9,Q9UC85,P04040,A8MV91,Q96L66,Q9P129,Q75KN0,Q05DN3,Q6TGM5,A4D1N4,Q9UJS0,Q4LE76,Q8NDD9,Q5T331,P14927,P42765,Q53T76,Q9HD23,Q8WU60,…	1438	419	12782	2.26992	1.45439e-13	5.21805e-15	3.33067e-13
GOTERM_CC_FAT	GO:0005743~mitochondrial inner membrane	86	4.52156	6.82444e-16	A8K512,Q8N5H5,O75964,Q5H9R2,A8K281,Q5T952,Q68DF1,Q6IAL5,Q02978,Q8TAS0,Q6PJX4,Q6TGM4,Q8NCF7,Q6LEN1,P13073,Q9UG93,Q53ET4,Q96KF9,Q8TAA5,O60313,Q16836,Q2YDB7,Q5HYG8,Q6P1Q8,Q9P1A0,Q3SY17,Q96AM7,P43155,Q53T69,Q5U0M9,Q96L66,Q9P129,Q9UJS0,Q6TGM5,Q05DN3,A4D1N4,Q5T331,P14927,P42765,Q53T76,Q9HD23,Q8WU60,Q7GY08,Q6IB06,Q6FHP5,P06576,P55084,Q16718,Q59EP7,A2RUF3,P49748,Q9BPW8,Q86WV2,Q6IBC0,P50440,A8K414,A8K0K3,…	1438	306	12782	2.49814	4.36318e-13	1.5099e-14	9.99201e-13
GOTERM_CC_FAT	GO:0031966~mitochondrial membrane	99	5.20505	1.00432e-14	A8K512,Q8N5H5,O75964,Q8IXI2,Q5H9R2,P00167,A8K281,Q5T952,Q68DF1,Q6IAL5,Q59F44,Q02978,Q8TAS0,Q92934,Q6PJX4,Q6TGM4,Q8NCF7,Q6LEN1,Q9UG93,P13073,Q53ET4,Q96KF9,Q8TAA5,O60313,Q2YDB7,Q16836,Q6P1Q8,Q5HYG8,Q9P1A0,Q96AM7,Q3SY17,P43155,Q53T69,O95140,Q5U0M9,A8MV91,Q96L66,Q9P129,Q75KN0,Q05DN3,Q6TGM5,A4D1N4,Q9UJS0,Q4LE76,Q5T331,P14927,P42765,Q53T76,Q9HD23,Q8WU60,Q7GY08,Q6IB06,P06576,Q6FHP5,P55084,Q59EP7,Q16718,…	1438	394	12782	2.23346	6.54476e-12	2.04503e-13	1.49325e-11
GOTERM_CC_FAT	GO:0031090~organelle membrane	173	9.09569	1.87663e-06	Q8N5H5,Q9NTJ5,O75351,O75964,Q7LA14,Q8IXI2,Q5H9R2,P00167,Q96GX3,Q53R94,A8K281,Q5T952,Q68DF1,Q6IAL5,Q8WXH0,Q59F44,Q59F45,A6NJP3,Q7LA22,Q9BZZ3,Q8TAS0,Q92934,Q5I6Y6,Q5I6Y4,Q5I6Y5,P13073,Q6MZP0,P21579,Q53SY1,Q86TP8,O95782,Q2YDB7,Q16836,Q59G12,Q5HYG8,Q9P1A0,Q13789,Q53T69,O75477,Q5U0M9,Q9UC85,Q5T246,A8MV91,Q96L66,Q5T250,Q75KN0,A4D177,O75381,Q05DN3,Q3V793,Q5T331,P14927,Q53T76,Q6IB06,P06576,Q92508,P57737,…	1438	1096	12782	1.40306	0.00122844	2.23487e-05	0.00280485
Annotation Cluster 9	Enrichment Score: 20.00396597646274
Category	Term	Count	%	PValue	Genes	List Total	Pop Hits	Pop Total	Fold Enrichment	Bonferroni	Benjamini	FDR
GOTERM_BP_FAT	GO:0051276~chromosome organization	161	8.46477	4.85278e-36	Q6DRA9,A4QPB4,Q9ULG1,Q92925,Q32Q15,A2RUU6,Q99414,Q9NTJ3,Q6PIA1,Q5H924,Q6TXQ4,Q05BI0,Q5CZ83,Q92922,Q0EF63,Q0EF62,Q6VBB7,Q5JPE5,Q8NC65,Q9Y4A5,Q9NTI5,Q0VAE4,Q8TBS8,Q01105,O95983,Q92522,A6NJ42,Q59FP7,Q17RB6,Q96L91,Q8TD98,Q1L6K4,Q8IWJ0,O75478,Q1L6K6,O75376,Q53XI7,Q8NAR9,A8K5E3,Q0ZAI9,A8K6E7,Q6IPL9,A4D177,Q0VF46,A8K6E5,Q57Z54,Q5JNZ9,Q969X9,Q8TAQ2,Q6FG89,Q99549,Q9NRG0,Q6IT96,A8K0U9,Q75MN6,A8K5D7,P26583,…	1611	485	13528	2.78755	1.80572e-32	4.5143e-33	8.94781e-33
GOTERM_BP_FAT	GO:0006325~chromatin organization	131	6.88749	2.13786e-31	Q6DRA9,Q9ULG1,Q6PJY7,Q92925,A2RUU6,Q99414,Q9H7Z6,A7E2B4,Q5H924,Q6PIA1,Q6TXQ4,Q5VXV2,Q09028,Q4W5G3,Q5VXV3,Q05BI0,Q5CZ83,Q92922,Q9NUK2,Q0EF63,Q0EF62,Q8WYH8,Q5JPE5,Q8NC65,Q6FHQ0,Q9Y4A5,Q8TBS8,Q0VAE4,Q01105,Q05BW5,A8K6H2,Q99879,Q6PJX4,Q99878,Q7Z6E0,O95983,O95251,Q92522,Q99880,Q8NDF0,Q9UQL6,P55209,Q59FP7,Q4W5H1,Q17RB6,Q96L91,P55201,Q16594,Q8TD98,Q68DW3,Q8IWJ0,P26358,Q92794,O75478,O75376,Q5SWC8,Q92793,…	1611	378	13528	2.91016	7.95498e-28	9.94373e-29	3.9419e-28
GOTERM_BP_FAT	GO:0006333~chromatin assembly or disassembly	57	2.99685	5.88981e-20	Q6DRA9,A8K4Z1,Q59EJ8,Q69YR9,Q86UJ6,A2RUU6,P0C0S8,Q9H7Z6,P10412,Q6TXQ4,P0C0S5,Q5VXV2,Q5VXV3,Q05BI0,Q4W5G3,P49711,Q92922,Q5JPE5,Q6FGB8,Q01105,Q05BW5,Q99879,Q99878,Q92522,Q99880,Q8NDF0,P16403,P55209,Q4W5H1,P16402,P16401,A8K4I2,A3R0T8,Q92794,Q02539,Q5SWC8,Q53XI7,Q8NAR9,Q5SWC6,P84243,Q0VGA3,A6NFS4,P49736,Q6IPL9,A4D177,Q9NX34,Q5SSJ6,Q9UIG0,Q8TAQ2,Q14839,Q2TAZ1,Q6P1K4,Q05DG0,Q92993,O60264,Q99549,Q96T23,…	1611	127	13528	3.76885	2.1916e-16	1.56543e-17	1.086e-16
SP_PIR_KEYWORDS	chromatin regulator	67	3.52261	5.17874e-18	Q92925,Q99414,Q6PIA1,Q9H7Z6,Q4W5G3,Q7Z6D8,Q09028,Q5CZ83,Q92922,Q0EF63,Q0EF62,Q8WYH8,Q8NC65,Q6FHQ0,Q9Y4A5,Q8TBS8,Q0VAE4,Q05BW5,Q7Z6E0,O95251,Q9UQL6,Q4W5H1,Q59FP7,Q17RB6,Q96L91,P55201,Q8TD98,P26358,Q92794,O75376,Q8NFD5,Q53XI7,Q8NAR9,A8K5E3,A4D177,Q0VF46,Q57Z54,Q5JNZ9,Q969X9,Q8TAQ2,Q14839,Q8N4T7,Q29RF6,Q9UMN6,A6NHB0,Q6IT96,Q96T23,A7E2E1,Q75MN6,A8MZ91,Q86WG4,O14744,Q76L81,Q4ZFX8,A2A2T3,Q9NSJ7,Q9P0K0,…	1895	213	19235	3.19285	3.28332e-15	1.42753e-16	7.70628e-15
GOTERM_BP_FAT	GO:0016568~chromatin modification	86	4.52156	1.02444e-17	Q6PJY7,Q9ULG1,Q92925,Q99414,Q5H924,Q6PIA1,A7E2B4,Q9H7Z6,Q09028,Q4W5G3,Q5CZ83,Q9NUK2,Q92922,Q0EF63,Q0EF62,Q8WYH8,Q8NC65,Q6FHQ0,Q9Y4A5,Q8TBS8,Q0VAE4,Q05BW5,A8K6H2,Q7Z6E0,O95983,O95251,Q9UQL6,Q59FP7,Q4W5H1,Q17RB6,Q96L91,P55201,Q16594,Q8TD98,Q8IWJ0,P26358,Q92794,O75478,O75376,Q8NFD5,Q92793,Q53XI7,Q8NAR9,A8K5E3,A4D177,Q0VF46,Q57Z54,Q5JNZ9,Q969X9,Q8TAQ2,Q14839,Q8N4T7,P61088,Q29RF6,Q9UMN6,A6NHB0,Q6IT96,…	1611	274	13528	2.63564	3.81196e-14	2.11776e-15	1.88893e-14
GOTERM_BP_FAT	GO:0016569~covalent chromatin modification	44	2.31335	4.87077e-11	A8K4Z1,A4KYM4,Q69YR9,Q59EJ8,A4KYM6,Q86UJ6,O75150,Q5H924,P51532,Q9HAF1,Q9H7Z6,A8K001,Q59G93,Q5CZ83,A0JNS3,Q0EF63,Q0EF62,Q8WYH8,Q9Y4A5,Q0VAE4,Q8TBS8,Q59FH1,Q7Z6E0,O95251,O95983,Q96IW5,A2A2I5,Q9UQL6,Q17RB6,Q96L91,Q16594,P55201,Q4VBQ6,Q9UPT9,Q8IWJ0,Q92794,O75478,Q92793,A4D265,A8K1P3,P35232,Q57Z54,Q9UIG0,Q8N4T7,P61088,Q6P1K4,Q9BT87,Q92993,Q9H0E9,A6NHB0,Q6IT96,Q6MZY4,Q6FHP5,A7E2E1,A8MZ91,Q92613,Q76L81,…	1611	126	13528	2.93238	1.81241e-07	3.41965e-09	8.98099e-08
GOTERM_BP_FAT	GO:0016570~histone modification	43	2.26078	5.94096e-11	A8K4Z1,A4KYM4,Q69YR9,Q59EJ8,A4KYM6,Q86UJ6,O75150,Q9HAF1,Q9H7Z6,A8K001,Q5H924,Q59G93,Q5CZ83,A0JNS3,Q0EF63,Q0EF62,Q8WYH8,Q9Y4A5,Q0VAE4,Q8TBS8,Q59FH1,Q7Z6E0,O95251,O95983,Q96IW5,A2A2I5,Q9UQL6,Q17RB6,Q96L91,Q16594,P55201,Q4VBQ6,Q9UPT9,Q8IWJ0,Q92794,O75478,Q92793,A4D265,A8K1P3,P35232,Q57Z54,Q9UIG0,Q8N4T7,P61088,Q6P1K4,Q9BT87,Q92993,Q9H0E9,A6NHB0,Q6IT96,Q6MZY4,Q6FHP5,A8MZ91,Q92613,Q76L81,O14744,Q9NSJ7,…	1611	122	13528	2.95969	2.21063e-07	4.01933e-09	1.09543e-07
Annotation Cluster 10	Enrichment Score: 19.78380231016444
Category	Term	Count	%	PValue	Genes	List Total	Pop Hits	Pop Total	Fold Enrichment	Bonferroni	Benjamini	FDR
SP_PIR_KEYWORDS	rna-binding	185	9.7266	3.01395e-55	Q9NTZ6,Q5VVD0,A8K2Z6,Q9UEL2,A6NIT8,A8K281,Q68DF1,Q59H21,Q6PKI6,Q05BI2,Q59FQ9,Q05CI5,Q9BV64,Q6P441,Q00839,Q59ES8,Q96Q11,Q8NF60,A8K6F2,Q6PJF7,Q5VVC8,Q04637,Q8IYH0,P54577,Q5VVC9,Q32Q22,A8K094,Q9BUV4,O95786,Q96BS4,Q59GP7,Q8NC51,Q96FV9,Q92804,A6NIR6,Q05CK9,Q6ZP53,Q96L66,Q6PKG0,O95758,A7MD20,P57721,Q6P2Q9,Q59H49,Q7Z3D7,Q5HYH5,P51991,Q0VAC0,Q53XJ6,Q53XJ4,P52756,Q53GL6,Q64I72,Q53GL4,Q64I73,Q6PKH5,P07814,…	1895	540	19235	3.47745	1.91085e-52	3.18474e-53	4.48495e-52
SMART	SM00360:RRM	72	3.78549	1.63704e-21	O60812,Q9NTZ6,A6NIT8,P23246,Q53F64,Q9BV64,Q96T37,O43390,Q59ES8,O60506,Q2F832,Q14814,Q564D3,Q5T9U5,Q5T9U4,Q5T9U6,Q9UKV3,Q0VGD6,Q3MIB7,Q68DW3,Q2TSD2,Q92804,Q7KYM9,Q5VX58,Q9BUQ0,Q05CK9,Q6ZP53,O95758,A7MD20,Q6FI03,Q59H49,Q7Z3D7,Q5IRM7,Q4G0J3,P26368,P51991,Q0VAC0,Q96EP5,Q53XJ4,Q0P607,P52756,Q53GL6,Q6PKH5,Q53GL4,Q68DG4,Q2VIP3,Q01130,Q8IXT5,Q5VZZ6,A8K4L9,Q2L7G6,Q4LE66,P31943,Q8TCM5,Q5T8P6,Q15233,Q15424,…	909	211	9079	3.40819	4.7474e-19	4.7474e-19	2.17626e-18
INTERPRO	IPR012677:Nucleotide-binding, alpha-beta plait	75	3.94322	5.99948e-21	O60812,Q9NTZ6,P62750,A6NIT8,P23246,Q53F64,Q9BV64,O43390,Q96T37,Q59ES8,O60506,Q2F832,Q14814,Q564D3,Q5T9U5,Q5T9U4,Q5T9U6,Q9UKV3,Q0VGD6,Q3MIB7,Q68DW3,Q7Z3D1,Q2TSD2,Q92804,Q7KYM9,Q5VX58,Q9BUQ0,Q05CK9,Q6ZP53,O95758,Q6FI03,Q59H49,Q7Z3D7,Q5IRM7,Q4G0J3,P26368,P51991,Q0VAC0,Q96EP5,Q53XJ4,Q0P607,P52756,Q53GL6,Q53GL4,Q6PKH5,Q68DG4,Q2VIP3,Q01130,P62847,Q8IXT5,Q5VZZ6,A8K4L9,Q2L7G6,Q4LE66,P31943,Q8TCM5,Q5T8P6,…	1804	213	16659	3.25158	1.38588e-17	1.38588e-17	1.04886e-17
INTERPRO	IPR000504:RNA recognition motif, RNP-1	72	3.78549	2.83325e-19	O60812,Q9NTZ6,A6NIT8,P23246,Q53F64,Q9BV64,Q96T37,O43390,Q59ES8,O60506,Q2F832,Q14814,Q564D3,Q5T9U5,Q5T9U4,Q5T9U6,Q9UKV3,Q0VGD6,Q3MIB7,Q68DW3,Q2TSD2,Q92804,Q7KYM9,Q5VX58,Q9BUQ0,Q05CK9,Q6ZP53,O95758,A7MD20,Q6FI03,Q59H49,Q7Z3D7,Q5IRM7,Q4G0J3,P26368,P51991,Q0VAC0,Q96EP5,Q53XJ4,Q0P607,P52756,Q53GL6,Q6PKH5,Q53GL4,Q68DG4,Q2VIP3,Q01130,Q8IXT5,Q5VZZ6,A8K4L9,Q2L7G6,Q4LE66,P31943,Q8TCM5,Q5T8P6,Q15233,Q15424,…	1804	211	16659	3.1511	6.54481e-16	3.27241e-16	4.95322e-16
UP_SEQ_FEATURE	domain:RRM 2	42	2.2082	2.8665e-16	Q01085,Q9BSV4,Q9NTZ6,P52597,A8K4Z8,A8K9J2,O95319,A6NIT8,Q147Y3,P23246,Q53F64,A1L400,Q69YJ7,Q9BV64,Q9NTB1,Q96DU9,O43390,Q96T37,Q6NTA2,Q59ES8,Q6IQ30,O60506,Q99829,Q59EK7,P22626,Q99729,Q96HC5,P11940,P55795,Q3ZCS4,Q0VGD6,Q4V760,Q49AS9,Q59GY3,Q92879,Q3MIB7,Q5JX60,Q5JX61,Q9H361,Q5CZA7,Q86VW9,Q2TSD2,Q66K53,Q15164,A8MYB5,Q9BTX0,Q7KYM9,Q5VX58,Q9BUQ0,Q05CK9,Q32P51,O95758,Q59EY1,Q59H49,A8K3T0,Q7Z3D7,Q59GZ7,…	1886	101	19113	4.2142	1.41487e-12	2.35811e-13	6.21725e-13
UP_SEQ_FEATURE	domain:RRM 1	42	2.2082	2.8665e-16	Q01085,Q9BSV4,Q9NTZ6,P52597,A8K4Z8,A8K9J2,O95319,A6NIT8,Q147Y3,P23246,Q53F64,A1L400,Q69YJ7,Q9BV64,Q9NTB1,Q96DU9,O43390,Q96T37,Q6NTA2,Q59ES8,Q6IQ30,O60506,Q99829,Q59EK7,P22626,Q99729,Q96HC5,P11940,P55795,Q3ZCS4,Q0VGD6,Q4V760,Q49AS9,Q59GY3,Q92879,Q3MIB7,Q5JX60,Q5JX61,Q9H361,Q5CZA7,Q86VW9,Q2TSD2,Q66K53,Q15164,A8MYB5,Q9BTX0,Q7KYM9,Q5VX58,Q9BUQ0,Q05CK9,Q32P51,O95758,Q59EY1,Q59H49,A8K3T0,Q7Z3D7,Q59GZ7,…	1886	101	19113	4.2142	1.41487e-12	2.35811e-13	6.21725e-13
UP_SEQ_FEATURE	domain:RRM 3	22	1.15668	2.68666e-09	Q8IXT5,Q01085,Q9NTZ6,P52597,Q5VZZ6,Q9UCF0,A8K4L9,Q2L7G6,O95319,A6NIT8,P31943,Q147Y3,Q8TCM5,A1L400,Q69YJ7,Q9BV64,Q96DU9,Q68DB9,Q9BQ02,Q96T37,Q6NTA2,O43390,A8K240,Q8NI96,Q59ES8,Q6IQ30,O60506,Q99829,Q6MZS5,Q13310,Q6ZS99,Q96HC5,P55795,Q7Z334,P11940,Q3ZB86,P26599,Q3ZCS4,Q0VGD6,Q4V760,Q92879,Q49AS9,Q59GL1,P19338,Q5JX60,Q5JX61,Q9H361,Q86VW9,Q2TSD2,P14866,Q5JX58,Q5JX59,Q6IBM4,A8MYB5,A8MQ42,Q15164,Q7KYM9,…	1886	50	19113	4.45902	1.14129e-05	1.03754e-06	5.02512e-06
UP_SEQ_FEATURE	domain:RRM	28	1.47213	2.89783e-05	O60812,Q15287,Q6NXQ0,Q9UFS1,Q53FN0,A6NDM5,Q8N8Y7,Q15424,P05455,Q13283,Q16629,Q75MU2,Q2F832,Q5W009,P52298,Q86X94,Q9NW64,Q564D3,Q53TM1,Q8NAK9,Q5U0Q1,A8K1P0,Q9UKM9,Q5W010,Q5W011,Q9Y3B4,Q15367,Q4G0E3,A4D208,P38159,Q68DW3,P84103,Q6GPH5,Q7Z5Y0,Q9NWH9,O95104,Q32P45,Q5QPL9,Q92804,Q8WYK5,P23588,Q14730,Q15056,Q96G38,Q6ZP53,Q9BRL6,A7MD20,Q6FI03,Q9UMH5,Q9UMH7,Q9UMH6,Q86U42,Q59FS8,Q8NB80,Q4G0J3,Q92615,Q86UM1,…	1886	119	19113	2.38451	0.115826	0.00423589	0.0541871
Annotation Cluster 11	Enrichment Score: 17.857598913334673
Category	Term	Count	%	PValue	Genes	List Total	Pop Hits	Pop Total	Fold Enrichment	Bonferroni	Benjamini	FDR
GOTERM_BP_FAT	GO:0034621~cellular macromolecular complex subunit organization	116	6.09884	4.42642e-25	Q6DRA9,P07437,Q6PJY7,O60610,Q8NF52,Q9H6Z0,Q2VPJ6,O14787,O15212,A2RUU6,A2A418,Q9NQW6,Q9H7Z5,Q86TQ3,Q6TXQ4,Q6LC01,Q5VXV2,Q9UQM3,Q4W5G3,Q5VXV3,Q05BI0,A6NGM0,Q9BQE3,Q5HY53,Q53HM6,P59998,Q59F45,A8K086,Q59G27,Q69YZ5,Q8TEQ6,Q8NC65,Q5HY55,Q5HY54,Q53G92,Q01105,A8K6H2,Q6PJF7,Q99879,Q99878,Q92526,Q92522,Q96CE4,Q99880,Q86U12,Q8NDF0,Q8TBA7,Q1JUQ5,P55209,Q4W5H1,Q1JUQ3,A8K9T4,Q15459,Q8IXG0,Q92794,Q96IL1,Q7KYN0,…	1611	357	13528	2.72852	1.64707e-21	1.83008e-22	8.16167e-22
GOTERM_BP_FAT	GO:0034622~cellular macromolecular complex assembly	106	5.57308	6.19802e-24	Q6DRA9,P07437,O60610,Q8NF52,Q9H6Z0,Q2VPJ6,O14787,O15212,A2RUU6,A2A418,Q9NQW6,Q9H7Z5,Q86TQ3,Q6TXQ4,Q5VXV2,Q6LC01,Q9UQM3,Q4W5G3,Q5VXV3,Q05BI0,A6NGM0,Q9BQE3,Q5HY53,Q53HM6,P59998,Q59F45,A8K086,Q69YZ5,Q8TEQ6,Q5HY55,Q5HY54,Q53G92,Q01105,Q6PJF7,Q99879,Q99878,Q92526,Q92522,Q99880,Q86U12,Q8NDF0,Q8TBA7,Q1JUQ5,P55209,Q4W5H1,Q1JUQ3,A8K9T4,Q15459,Q8IXG0,Q92794,Q96IL1,Q7KYN0,Q60FE6,Q5SWC8,Q6PIW8,Q5SWC6,Q60FE5,…	1611	318	13528	2.79909	2.30628e-20	2.09662e-21	1.14282e-20
GOTERM_BP_FAT	GO:0065003~macromolecular complex assembly	167	8.78023	5.18011e-22	Q6DRA9,P07437,Q8NF52,P13984,Q2VPJ6,O15212,A2RUU6,A2A418,Q86TQ3,Q53R85,Q6TXQ4,Q05BI0,Q53HM6,P59998,Q59F45,A8K086,Q69YZ5,Q01105,Q6AI22,Q6PJF7,Q92526,Q92522,Q86U12,P21579,Q5T2U1,Q8TD98,Q13789,Q8IXG0,A4D0W4,Q9H0N5,Q9UC85,Q05DN6,P01106,Q6IPL9,O75381,Q59EQ2,Q3V793,A4D0V4,Q7Z5T5,P83731,Q4VBX7,Q8TC62,P52756,Q6UR97,P07814,A8K0U9,Q6UR98,A8K5D7,P26583,Q49A78,A8MZ91,Q7Z5U1,Q96C61,A6NJQ0,P52655,Q59H38,Q76L81,…	1611	665	13528	2.10879	1.92752e-18	1.60627e-19	9.55137e-19
GOTERM_BP_FAT	GO:0043933~macromolecular complex subunit organization	174	9.14826	1.04581e-21	Q6DRA9,P07437,Q8NF52,P13984,Q2VPJ6,O15212,A2RUU6,A2A418,Q86TQ3,Q53R85,Q6TXQ4,Q05BI0,Q53HM6,P59998,Q59F45,A8K086,Q59G27,Q69YZ5,Q8NC65,Q01105,Q6AI22,Q6PJF7,Q92526,Q92522,Q86U12,P21579,Q5T2U1,Q8TD98,Q13789,Q8IXG0,A4D0W4,Q9H0N5,Q53XI7,Q9UC85,Q05DN6,P01106,Q6IPL9,O75381,Q59EQ2,Q3V793,A4D0V4,Q7Z5T5,P83731,Q4VBX7,Q8TC62,P52756,Q6UR97,P07814,A8K0U9,Q6UR98,Q49A78,A8K5D7,P26583,A8MZ91,Q7Z5U1,Q96C61,A6NJQ0,…	1611	710	13528	2.05792	3.89144e-18	2.99342e-19	1.92831e-18
GOTERM_BP_FAT	GO:0006461~protein complex assembly	107	5.62566	2.19359e-09	P07437,O60610,Q8NF52,Q9H6Z0,P13984,Q2VPJ6,O14787,O15212,A2A418,Q59GA5,Q9NQW6,Q9H7Z5,Q86TQ3,Q53R85,Q6ICN0,Q6LC01,Q6P0P7,Q9UQM3,Q4W5G3,Q9BSJ2,A6NGM0,Q9BQE3,Q5HY53,Q59F45,P59998,Q2XSC7,Q8TEQ6,Q69YZ5,Q5HY55,Q5HY54,Q53G92,Q6AI22,Q5VSR8,Q5VSR7,Q92526,A7E2C4,Q6LEN1,Q86U12,P23921,Q8TBA7,P21579,Q1JUQ5,A8MTE3,Q4W5H1,Q1JUQ3,Q16594,Q5T2U1,Q96AM7,Q8TD98,Q01813,Q96IL1,A4D0W4,Q19RW5,Q7KYN0,Q60FE6,Q6PIW8,Q9H0N5,…	1611	505	13528	1.77922	8.16232e-06	1.11813e-07	4.04466e-06
GOTERM_BP_FAT	GO:0070271~protein complex biogenesis	107	5.62566	2.19359e-09	P07437,O60610,Q8NF52,Q9H6Z0,P13984,Q2VPJ6,O14787,O15212,A2A418,Q59GA5,Q9NQW6,Q9H7Z5,Q86TQ3,Q53R85,Q6ICN0,Q6LC01,Q6P0P7,Q9UQM3,Q4W5G3,Q9BSJ2,A6NGM0,Q9BQE3,Q5HY53,Q59F45,P59998,Q2XSC7,Q8TEQ6,Q69YZ5,Q5HY55,Q5HY54,Q53G92,Q6AI22,Q5VSR8,Q5VSR7,Q92526,A7E2C4,Q6LEN1,Q86U12,P23921,Q8TBA7,P21579,Q1JUQ5,A8MTE3,Q4W5H1,Q1JUQ3,Q16594,Q5T2U1,Q96AM7,Q8TD98,Q01813,Q96IL1,A4D0W4,Q19RW5,Q7KYN0,Q60FE6,Q6PIW8,Q9H0N5,…	1611	505	13528	1.77922	8.16232e-06	1.11813e-07	4.04466e-06
Annotation Cluster 12	Enrichment Score: 14.21875615775985
Category	Term	Count	%	PValue	Genes	List Total	Pop Hits	Pop Total	Fold Enrichment	Bonferroni	Benjamini	FDR
SP_PIR_KEYWORDS	Chaperone	56	2.94427	9.28173e-18	Q59EJ3,Q2TU64,Q2VPJ6,Q53HF2,O15212,A8MWI8,P11142,Q53ZP9,P50502,Q9BV61,Q9HB74,Q96BE0,A6NN54,A8K8F1,O95456,Q99497,Q6FHQ0,Q53HV2,Q16543,Q9BU08,Q9H3Z4,Q9HAV7,Q59EK6,Q6AI22,Q2TU77,P17987,Q99426,Q8WW22,Q92526,Q2F839,Q6FGY5,Q86U12,Q6FH24,Q8TBA7,P08238,Q53X54,Q9NU22,A8K6F7,Q8TAA5,Q86SX1,Q6IBA3,P40227,Q0D2M7,Q9H072,Q58FG0,Q99832,P61221,Q58FF8,O95757,Q58FF7,A8K7D0,Q9UCR6,Q6ZP56,O95816,P50990,Q9H369,Q6FIA9,…	1895	158	19235	3.59761	5.88461e-15	2.45192e-16	1.38118e-14
GOTERM_MF_FAT	GO:0051082~unfolded protein binding	47	2.47108	4.14614e-14	Q59EJ3,Q2TU64,Q2VPJ6,Q53HF2,O15212,A8MWI8,Q2KHP4,P11142,Q9BV61,Q8IZ29,Q9HB74,Q96BE0,A6NN54,A8K8F1,Q53HV2,Q9BU08,Q16543,Q9H3Z4,Q9HAV7,Q59EK6,Q6AI22,P17987,Q8WW22,P30533,Q92526,Q2F839,Q8TA92,Q8IWP6,Q86U12,Q6FH24,Q8TBA7,Q53X54,P08238,Q9NU22,Q8TAA5,Q86SX1,P40227,A8K534,Q9H072,Q58FG0,Q99832,A8K220,Q58FF9,Q58FF8,Q58FF7,A8K7D0,Q6ZP56,Q9UCR6,Q9H369,P50990,P11021,P50991,Q6IBT3,A8K0M0,Q6FGD7,P27824,Q9NX34,…	1596	115	12983	3.32462	5.23025e-11	3.7359e-12	6.73794e-11
GOTERM_BP_FAT	GO:0006457~protein folding	58	3.04942	5.73402e-13	Q2TU64,Q2VPJ6,Q53HF2,O15212,A8MWI8,P11142,P49792,Q53ZP9,P50502,Q9BV61,Q9HB74,Q5W0X3,Q96BE0,A6NN54,A8K8F1,Q53HV2,Q9BU08,Q9H3Z4,Q9HAV7,Q59EK6,P49588,Q2TU77,P17987,Q5HYW6,Q8WW22,P30533,Q92526,Q2F839,Q5HYW4,Q86YK6,Q86U12,Q6FH24,Q9Y237,Q8TBA7,P08238,Q53X54,Q1JUQ5,Q1JUQ3,Q8TAA5,Q2YDB7,Q86SX1,P40227,A8K534,Q53GD8,Q9H072,Q8NFL2,Q58FG0,Q99832,Q00688,Q58FF9,A8K220,Q58FF8,O95757,Q58FF7,Q9UCR6,Q6ZP56,O95816,…	1611	177	13528	2.75165	2.13373e-09	6.66792e-11	1.05732e-09
Annotation Cluster 13	Enrichment Score: 14.134506108923548
Category	Term	Count	%	PValue	Genes	List Total	Pop Hits	Pop Total	Fold Enrichment	Bonferroni	Benjamini	FDR
GOTERM_CC_FAT	GO:0000785~chromatin	80	4.2061	1.73755e-25	Q6DRA9,Q68DE9,Q96QC0,A2RUU6,Q3SWU9,Q9H7Z6,Q6TXQ4,Q05BI0,Q09028,A6NGM0,Q92922,Q69YZ5,Q5JPE5,Q0VAE4,Q9NTI5,Q05BW5,Q99879,Q99878,Q6NSG7,O95983,Q92522,Q99880,Q8NDF0,Q6MZP3,Q59G12,Q92794,Q5SWC8,Q8NAR9,A8K5E3,Q5SWC6,Q6IPL9,A4D177,Q68DW7,Q2I0Y7,Q6AI02,A8MSG9,Q8TAQ2,Q29RF7,Q14839,Q9UNS1,Q6LC06,Q99549,Q6IT96,A7E2E1,A8K0U9,Q6FI13,A8K5D7,Q8WVK4,Q5T6U9,Q5T6U8,P60228,Q86WG4,Q76L81,Q71UI9,Q96KK5,Q0VAS5,A3KPC7,…	1438	200	12782	3.55549	1.13809e-22	5.98996e-24	2.59701e-22
GOTERM_BP_FAT	GO:0034621~cellular macromolecular complex subunit organization	116	6.09884	4.42642e-25	Q6DRA9,P07437,Q6PJY7,O60610,Q8NF52,Q9H6Z0,Q2VPJ6,O14787,O15212,A2RUU6,A2A418,Q9NQW6,Q9H7Z5,Q86TQ3,Q6TXQ4,Q6LC01,Q5VXV2,Q9UQM3,Q4W5G3,Q5VXV3,Q05BI0,A6NGM0,Q9BQE3,Q5HY53,Q53HM6,P59998,Q59F45,A8K086,Q59G27,Q69YZ5,Q8TEQ6,Q8NC65,Q5HY55,Q5HY54,Q53G92,Q01105,A8K6H2,Q6PJF7,Q99879,Q99878,Q92526,Q92522,Q96CE4,Q99880,Q86U12,Q8NDF0,Q8TBA7,Q1JUQ5,P55209,Q4W5H1,Q1JUQ3,A8K9T4,Q15459,Q8IXG0,Q92794,Q96IL1,Q7KYN0,…	1611	357	13528	2.72852	1.64707e-21	1.83008e-22	8.16167e-22
GOTERM_BP_FAT	GO:0034622~cellular macromolecular complex assembly	106	5.57308	6.19802e-24	Q6DRA9,P07437,O60610,Q8NF52,Q9H6Z0,Q2VPJ6,O14787,O15212,A2RUU6,A2A418,Q9NQW6,Q9H7Z5,Q86TQ3,Q6TXQ4,Q5VXV2,Q6LC01,Q9UQM3,Q4W5G3,Q5VXV3,Q05BI0,A6NGM0,Q9BQE3,Q5HY53,Q53HM6,P59998,Q59F45,A8K086,Q69YZ5,Q8TEQ6,Q5HY55,Q5HY54,Q53G92,Q01105,Q6PJF7,Q99879,Q99878,Q92526,Q92522,Q99880,Q86U12,Q8NDF0,Q8TBA7,Q1JUQ5,P55209,Q4W5H1,Q1JUQ3,A8K9T4,Q15459,Q8IXG0,Q92794,Q96IL1,Q7KYN0,Q60FE6,Q5SWC8,Q6PIW8,Q5SWC6,Q60FE5,…	1611	318	13528	2.79909	2.30628e-20	2.09662e-21	1.14282e-20
GOTERM_BP_FAT	GO:0006333~chromatin assembly or disassembly	57	2.99685	5.88981e-20	Q6DRA9,A8K4Z1,Q59EJ8,Q69YR9,Q86UJ6,A2RUU6,P0C0S8,Q9H7Z6,P10412,Q6TXQ4,P0C0S5,Q5VXV2,Q5VXV3,Q05BI0,Q4W5G3,P49711,Q92922,Q5JPE5,Q6FGB8,Q01105,Q05BW5,Q99879,Q99878,Q92522,Q99880,Q8NDF0,P16403,P55209,Q4W5H1,P16402,P16401,A8K4I2,A3R0T8,Q92794,Q02539,Q5SWC8,Q53XI7,Q8NAR9,Q5SWC6,P84243,Q0VGA3,A6NFS4,P49736,Q6IPL9,A4D177,Q9NX34,Q5SSJ6,Q9UIG0,Q8TAQ2,Q14839,Q2TAZ1,Q6P1K4,Q05DG0,Q92993,O60264,Q99549,Q96T23,…	1611	127	13528	3.76885	2.1916e-16	1.56543e-17	1.086e-16
SP_PIR_KEYWORDS	chromosomal protein	56	2.94427	1.00295e-19	Q6DRA9,O75150,A8K9J2,A2RUU6,P0C0S8,P10412,Q6TXQ4,P0C0S5,Q59GH7,Q05BI0,Q16466,Q53T09,Q6IC76,A6NM81,Q6FGB8,Q92878,Q99879,Q99878,Q6NSG7,Q92522,Q99880,Q8NDF0,Q08945,P16403,Q8IY18,P16402,P16401,Q6MZP7,Q9HAW4,A8K4I2,Q59G12,A3R0T8,Q02539,P12956,O75478,Q1RMC6,Q5SWC8,Q1RMC5,Q3B790,Q5SWC6,P84243,Q0VGA3,Q0Z7V0,A6NFS4,Q5UIP0,Q6IPL9,P23497,O15347,Q5SSJ6,Q6FG89,Q05D30,A8K0U9,Q32P42,Q6FI13,P68431,A8K5D7,P26583,…	1895	145	19235	3.92015	6.35873e-17	2.89033e-18	1.49246e-16
GOTERM_BP_FAT	GO:0034728~nucleosome organization	46	2.41851	3.01077e-18	Q6DRA9,Q69YR9,Q6PJY7,A2RUU6,P0C0S8,Q96SY8,P10412,P49321,Q6TXQ4,Q5VXV2,P0C0S5,Q4W5G3,Q5VXV3,Q05BI0,P49711,Q8NC65,Q6FGB8,Q01105,A8K6H2,Q99879,Q99878,Q92522,Q99880,Q8NDF0,P55209,P16403,Q4W5H1,P16402,P16401,A8K4I2,A3R0T8,Q02539,Q92794,Q5SWC8,Q53XI7,Q5SWC6,P84243,Q0VGA3,A6NFS4,Q6IPL9,P49736,Q5SSJ6,Q9NX34,Q05DG0,O60264,A8K0U9,Q96T23,Q5T627,Q6FI13,Q5T626,Q5T624,A8K5D7,P68431,P26583,Q5T6U9,A2BDF6,Q5T6U8,…	1611	93	13528	4.15349	1.12031e-14	7.00192e-16	5.55142e-15
GOTERM_BP_FAT	GO:0006323~DNA packaging	51	2.68139	2.81988e-17	Q6DRA9,A4QPB4,Q69YR9,Q15003,Q32Q15,A2RUU6,Q05BV1,Q9NTJ3,P0C0S8,Q7Z2X1,P10412,Q6TXQ4,P0C0S5,Q5VXV2,Q4W5G3,Q5VXV3,Q05BI0,Q69YJ6,P49711,Q5RZ99,Q6FGB8,Q01105,Q6NSG3,Q99879,Q99878,Q92522,Q99880,Q8NDF0,Q9UKV3,Q05D74,P16403,P55209,Q4W5H1,P16402,P16401,Q6IPS5,A8K4I2,A3R0T8,Q1L6K4,Q92794,Q02539,P11388,Q1L6K6,Q5SWC8,O43823,Q53XI7,Q5SWC6,P84243,A6NFS4,P49736,Q9NX34,Q5SSJ6,Q05DG0,O60264,Q6P712,Q6IEE0,Q96T23,…	1611	117	13528	3.66035	1.04928e-13	5.52251e-15	5.19945e-14
GOTERM_BP_FAT	GO:0031497~chromatin assembly	42	2.2082	3.06363e-16	Q6DRA9,Q76L81,Q69YR9,P04908,Q71UI9,Q96A08,Q96KK5,A2RUU6,P0C0S8,A3KPC7,Q0VAS5,P10412,Q6TXQ4,Q9BWF4,P0C0S5,A6NFA8,Q5VXV2,Q4W5G3,Q5VXV3,Q05BI0,A8MQC5,P49711,Q6FGB8,Q01105,P33778,Q99879,Q99878,P06748,Q92522,Q16777,Q9NV63,Q99880,Q9BYG9,Q8NDF0,P28001,P16403,A6NN01,P55209,Q08AJ9,Q9UHY0,Q4W5H1,P16402,P16401,A8K4I2,Q13112,Q16695,A3R0T8,Q92794,Q02539,A6NI71,Q93077,A5PLR1,Q5SWC8,Q71DI3,Q53XI7,Q5SWC6,P84243,…	1611	87	13528	4.05385	1.23934e-12	5.62883e-14	6.10623e-13
GOTERM_BP_FAT	GO:0006334~nucleosome assembly	41	2.15563	5.59752e-16	Q6DRA9,Q76L81,Q69YR9,P04908,Q71UI9,Q96A08,Q96KK5,A2RUU6,P0C0S8,A3KPC7,Q0VAS5,P10412,Q6TXQ4,Q9BWF4,P0C0S5,A6NFA8,Q5VXV2,Q4W5G3,Q5VXV3,Q05BI0,A8MQC5,Q6FGB8,Q01105,P33778,Q99879,Q99878,P06748,Q92522,Q16777,Q9NV63,Q99880,Q8NDF0,Q9BYG9,P28001,P16403,A6NN01,P55209,Q08AJ9,Q9UHY0,Q4W5H1,P16402,P16401,A8K4I2,Q13112,Q16695,A3R0T8,Q92794,Q02539,A6NI71,Q93077,A5PLR1,Q5SWC8,Q71DI3,Q5SWC6,P84243,A8K3N7,Q9BTM1,…	1611	84	13528	4.09867	2.06557e-12	8.60423e-14	1.02141e-12
GOTERM_CC_FAT	GO:0032993~protein-DNA complex	40	2.10305	1.39216e-15	Q6DRA9,Q76L81,Q69YR9,P04908,Q71UI9,Q2NLC9,Q96A08,Q96KK5,A2RUU6,P0C0S8,A3KPC7,Q0VAS5,P10412,Q6TXQ4,P0C0S5,A6NFA8,Q05BI0,Q53T09,A8MQC5,Q6IC76,Q8NHX6,Q6FGB8,Q00577,P33778,Q5U0P9,Q99879,Q99878,Q92522,Q16777,Q53HJ4,Q9NV63,Q99880,Q8NDF0,P28001,P16403,A6NN01,Q08AJ9,Q9UHY0,P16402,P16401,A8K4I2,Q2NLD4,Q16695,A3R0T8,Q15554,Q92794,Q02539,A8K0Y9,P12956,A6NI71,Q93077,A5PLR1,Q5SWC8,Q71DI3,Q5SWC6,P84243,Q0Z7V0,…	1438	86	12782	4.1343	9.45355e-13	3.15303e-14	2.15383e-12
GOTERM_BP_FAT	GO:0065004~protein-DNA complex assembly	42	2.2082	2.60796e-15	Q6DRA9,Q76L81,Q69YR9,P04908,Q71UI9,Q96A08,Q96KK5,A2RUU6,P0C0S8,A3KPC7,Q0VAS5,P10412,Q6TXQ4,Q9BWF4,P0C0S5,A6NFA8,Q5VXV2,Q4W5G3,Q5VXV3,Q05BI0,A8MQC5,Q6FGB8,Q01105,P33778,Q99879,Q99878,P49454,P06748,Q92522,Q16777,Q9NV63,Q99880,Q8NDF0,Q9BYG9,P28001,P16403,A6NN01,P55209,Q08AJ9,Q9UHY0,Q4W5H1,P16402,P16401,A8K4I2,Q13112,Q16695,A3R0T8,Q92794,Q02539,A6NI71,Q93077,A5PLR1,Q5SWC8,Q71DI3,Q5SWC6,P84243,A8K3N7,…	1611	91	13528	3.87566	9.50162e-12	3.65485e-13	4.70735e-12
GOTERM_CC_FAT	GO:0000786~nucleosome	33	1.73502	8.61145e-15	Q6DRA9,Q76L81,Q69YR9,P04908,Q71UI9,Q96A08,Q96KK5,A2RUU6,P0C0S8,A3KPC7,Q0VAS5,P10412,Q6TXQ4,A6NFA8,P0C0S5,Q05BI0,A8MQC5,Q6FGB8,Q99879,P33778,Q99878,Q92522,Q16777,Q9NV63,Q99880,Q8NDF0,P28001,P16403,Q08AJ9,A6NN01,Q9UHY0,P16402,P16401,A8K4I2,Q16695,A3R0T8,Q92794,Q02539,A6NI71,Q93077,A5PLR1,Q5SWC8,Q71DI3,Q5SWC6,P84243,Q9BTM1,A6NFS4,Q8WYB5,Q5QNW6,Q4VB24,Q9P0M6,Q96QV6,P62805,P16104,Q6NWP7,Q5SSJ6,A4FTV9,…	1438	63	12782	4.656	5.67213e-12	1.82965e-13	1.29452e-11
SP_PIR_KEYWORDS	nucleosome core	24	1.26183	1.66719e-11	Q6DRA9,P04908,Q71UI9,Q96A08,Q96KK5,A2RUU6,Q0VAS5,A3KPC7,P0C0S8,Q6TXQ4,A6NFA8,P0C0S5,A8MQC5,Q6FGB8,P33778,Q99879,Q99878,Q16777,Q9NV63,Q99880,P28001,A6NN01,Q08AJ9,Q16695,Q93077,A5PLR1,Q71DI3,P84243,Q9BTM1,A6NFS4,Q5QNW6,Q96QV6,Q9P0M6,P62805,P16104,Q6NWP7,A4FTV9,P20671,A8K0U9,Q6FI13,Q9HA11,P68431,Q7L7L0,A2BDF6,A6NKY0,P58876,A2VCL0,Q6NXT2,Q6B823	1895	48	19235	5.0752	1.057e-08	3.20302e-10	2.48088e-08
INTERPRO	IPR007125:Histone core	24	1.26183	2.07986e-11	Q6DRA9,P04908,Q71UI9,Q96A08,Q96KK5,A2RUU6,Q0VAS5,A3KPC7,P0C0S8,Q6TXQ4,A6NFA8,P0C0S5,A8MQC5,Q6FGB8,P33778,Q99879,Q99878,Q16777,Q9NV63,Q99880,P28001,A6NN01,Q08AJ9,Q16695,Q93077,A5PLR1,Q71DI3,P84243,Q9BTM1,A6NFS4,Q5QNW6,Q96QV6,Q9P0M6,P62805,P16104,Q6NWP7,A4FTV9,P20671,A8K0U9,Q6FI13,Q9HA11,P68431,Q7L7L0,A2BDF6,A6NKY0,P58876,A2VCL0,Q6NXT2,Q6B823	1804	45	16659	4.92506	4.8045e-08	8.0075e-09	3.63612e-08
SP_PIR_KEYWORDS	citrullination	15	0.788644	1.14792e-09	Q16695,Q6DRA9,P04908,Q96KK5,Q93077,A5PLR1,A2RUU6,Q71DI3,P0C0S8,A3KPC7,Q0VAS5,P84243,Q6TXQ4,Q7Z794,Q38HM2,A6NFS4,Q96QV6,P62805,Q6FGB8,Q6NWP7,Q09472,Q99878,A4FTV9,Q0IIN1,P20671,Q16777,Q147W7,P28001,Q6FI13,Q08AJ9,P68431,Q7L7L0,A2BDF6,Q7Z6C1,Q6NXT2,A2VCL0,Q6B823	1895	22	19235	6.92072	7.27783e-07	1.65405e-08	1.70818e-06
SMART	SM00414:H2A	14	0.736067	1.41286e-09	P04908,Q71UI9,Q96KK5,Q93077,A5PLR1,A2RUU6,Q71DI3,P0C0S8,A3KPC7,A6NFA8,Q9BTM1,P0C0S5,A6NFS4,A8MQC5,Q96QV6,Q9P0M6,P16104,Q99878,A4FTV9,P20671,Q16777,Q9NV63,P28001,Q6FI13,Q9HA11,Q08AJ9,A6NN01,P68431,Q7L7L0,A2BDF6,A6NKY0	909	19	9079	7.3595	4.0973e-07	6.82884e-08	1.87825e-06
INTERPRO	IPR002119:Histone H2A	14	0.736067	3.88555e-09	P04908,Q71UI9,Q96KK5,Q93077,A5PLR1,A2RUU6,Q71DI3,P0C0S8,A3KPC7,A6NFA8,Q9BTM1,P0C0S5,A6NFS4,A8MQC5,Q96QV6,Q9P0M6,P16104,Q99878,A4FTV9,P20671,Q16777,Q9NV63,P28001,Q6FI13,Q9HA11,Q08AJ9,A6NN01,P68431,Q7L7L0,A2BDF6,A6NKY0	1804	19	16659	6.80435	8.97559e-06	6.41116e-07	6.79289e-06
PIR_SUPERFAMILY	PIRSF002048:histone H2A	13	0.683491	8.04394e-09	P04908,Q71UI9,Q96KK5,Q93077,A5PLR1,A2RUU6,Q71DI3,P0C0S8,A3KPC7,A6NFA8,Q9BTM1,P0C0S5,A6NFS4,A8MQC5,Q96QV6,P16104,Q99878,A4FTV9,P20671,Q16777,Q9NV63,P28001,Q6FI13,Q08AJ9,A6NN01,P68431,Q7L7L0,A2BDF6,A6NKY0	976	15	7396	6.56749	7.07864e-06	7.07864e-06	1.2502e-05
INTERPRO	IPR009072:Histone-fold	19	0.998948	8.04502e-06	Q16695,Q6DRA9,P04908,Q71UI9,Q96A08,Q96KK5,A5PLR1,A2RUU6,Q71DI3,P0C0S8,A3KPC7,Q0VAS5,P84243,Q6TXQ4,Q9BTM1,P0C0S5,A6NFA8,A6NFS4,A8MQC5,Q5QNW6,Q9P0M6,P62805,Q6FGB8,Q6NWP7,Q99879,P33778,Q99878,A4FTV9,P20671,Q9NV63,Q9NRG0,Q99880,A8K0U9,P28001,Q9HA11,Q08AJ9,A6NN01,P68431,A2BDF6,A6NKY0,Q6NXT2,P58876,A2VCL0,Q6B823,Q16594	1804	54	16659	3.24917	0.0184125	0.000640625	0.0140637
KEGG_PATHWAY	hsa05322:Systemic lupus erythematosus	29	1.52471	0.00112607	Q6DRA9,P04908,Q71UI9,Q96A08,Q96KK5,A2RUU6,P0C0S8,A3KPC7,Q0VAS5,P14678,Q15182,Q6TXQ4,A6NFA8,P0C0S5,P05455,A8MQC5,P10155,O43707,Q2F832,Q6FGB8,P33778,Q99879,Q99878,Q16777,Q9NV63,Q66K91,Q99880,P28001,A6NN01,Q08AJ9,Q86TX4,Q5ZEZ4,Q15367,Q5XPV6,Q16695,Q5LJA0,Q9UIS4,Q5LJ99,Q5LJ97,Q5LJ98,Q93077,A5PLR1,Q71DI3,Q86WL3,P84243,P12814,Q14730,Q1HE25,Q9BTM1,A6NFS4,Q86WL4,Q5QNW6,Q9UMH5,Q9UMH7,Q9P0M6,Q96QV6,Q9UMH6,…	808	99	5085	1.8435	0.175244	0.0112694	1.3665
Annotation Cluster 14	Enrichment Score: 13.914121893960724
Category	Term	Count	%	PValue	Genes	List Total	Pop Hits	Pop Total	Fold Enrichment	Bonferroni	Benjamini	FDR
SP_PIR_KEYWORDS	Aminoacyl-tRNA synthetase	29	1.52471	2.94723e-20	Q5TCC4,Q4ZFX1,Q53GY4,Q96I59,P47897,Q502Y0,Q9NP81,Q68CR9,Q7Z355,Q9BQR0,Q15031,Q53R85,Q6IBR2,Q7Z3T4,Q9HB23,Q9H3A5,Q6AW83,Q9Y285,Q9HA77,Q53GX7,Q52NV4,P49589,P49588,P41252,Q9NSE4,Q9BR63,P54577,P41250,Q6P0M4,Q53HA4,P78534,A6NHW7,Q53T60,Q6PI48,Q9BUZ3,Q9P1N9,O43776,P49590,A6NGN1,O95363,Q7L4K8,Q53HS0,Q3KQZ8,Q9NSD9,Q96AW5,P49591,Q496C9,A8MVQ3,P56192,P14868,A8K5X5,Q9H9M6,Q57ZJ5,P54136,Q59G75,Q8TEA8,Q5JRF7,…	1895	39	19235	7.54773	1.86854e-17	8.89783e-19	4.38566e-17
GOTERM_BP_FAT	GO:0043039~tRNA aminoacylation	33	1.73502	8.39055e-20	Q5TCC4,Q4ZFX1,Q53GY4,Q12904,Q96I59,P47897,Q502Y0,Q9NP81,Q504U6,Q68CR9,Q7Z355,Q9BQR0,Q15031,Q53R85,P12270,Q6IBR2,Q7Z3T4,Q58F23,Q9P2K8,Q9HB23,Q9H3A5,Q6AW83,Q9Y285,Q9HA77,Q53GX7,Q52NV4,P49589,Q9UHN1,P49588,Q9NSE4,P41252,Q9BR63,P54577,P41250,Q53HA4,Q6P0M4,P78534,A6NHW7,Q53T60,Q6PI48,Q9BUZ3,Q9P1N9,O43776,P49590,A6NGN1,O95363,Q7L4K8,Q53HS0,Q3KQZ8,Q9NSD9,Q99968,Q96AW5,P49591,Q15624,Q496C9,A8MVQ3,P56192,…	1611	46	13528	6.02413	3.12212e-16	2.08142e-17	1.54709e-16
GOTERM_BP_FAT	GO:0043038~amino acid activation	33	1.73502	8.39055e-20	Q5TCC4,Q4ZFX1,Q53GY4,Q12904,Q96I59,P47897,Q502Y0,Q9NP81,Q504U6,Q68CR9,Q7Z355,Q9BQR0,Q15031,Q53R85,P12270,Q6IBR2,Q7Z3T4,Q58F23,Q9P2K8,Q9HB23,Q9H3A5,Q6AW83,Q9Y285,Q9HA77,Q53GX7,Q52NV4,P49589,Q9UHN1,P49588,Q9NSE4,P41252,Q9BR63,P54577,P41250,Q53HA4,Q6P0M4,P78534,A6NHW7,Q53T60,Q6PI48,Q9BUZ3,Q9P1N9,O43776,P49590,A6NGN1,O95363,Q7L4K8,Q53HS0,Q3KQZ8,Q9NSD9,Q99968,Q96AW5,P49591,Q15624,Q496C9,A8MVQ3,P56192,…	1611	46	13528	6.02413	3.12212e-16	2.08142e-17	1.54709e-16
GOTERM_BP_FAT	GO:0006418~tRNA aminoacylation for protein translation	33	1.73502	8.39055e-20	Q5TCC4,Q4ZFX1,Q53GY4,Q12904,Q96I59,P47897,Q502Y0,Q9NP81,Q504U6,Q68CR9,Q7Z355,Q9BQR0,Q15031,Q53R85,P12270,Q6IBR2,Q7Z3T4,Q58F23,Q9P2K8,Q9HB23,Q9H3A5,Q6AW83,Q9Y285,Q9HA77,Q53GX7,Q52NV4,P49589,Q9UHN1,P49588,Q9NSE4,P41252,Q9BR63,P54577,P41250,Q53HA4,Q6P0M4,P78534,A6NHW7,Q53T60,Q6PI48,Q9BUZ3,Q9P1N9,O43776,P49590,A6NGN1,O95363,Q7L4K8,Q53HS0,Q3KQZ8,Q9NSD9,Q99968,Q96AW5,P49591,Q15624,Q496C9,A8MVQ3,P56192,…	1611	46	13528	6.02413	3.12212e-16	2.08142e-17	1.54709e-16
GOTERM_MF_FAT	GO:0016876~ligase activity, forming aminoacyl-tRNA and related compounds	32	1.68244	8.73649e-18	Q5TCC4,Q4ZFX1,Q53GY4,Q96I59,P47897,Q502Y0,Q9NP81,Q504U6,Q68CR9,Q7Z355,Q9BQR0,Q15031,Q53R85,P12270,Q6IBR2,Q7Z3T4,Q58F23,Q9P2K8,Q9HB23,Q9H3A5,Q6AW83,Q9Y285,Q9HA77,Q53GX7,Q52NV4,P49589,Q9UHN1,P49588,P41252,Q9NSE4,Q9BR63,P54577,P41250,Q6P0M4,Q53HA4,P78534,A6NHW7,Q53T60,Q6PI48,Q9BUZ3,Q9P1N9,O43776,P49590,A6NGN1,O95363,Q7L4K8,Q53HS0,Q3KQZ8,Q9NSD9,Q99968,Q96AW5,P49591,Q15624,Q496C9,A8MVQ3,P56192,P14868,…	1596	47	12983	5.53853	1.10342e-14	1.00311e-15	1.42139e-14
GOTERM_MF_FAT	GO:0016875~ligase activity, forming carbon-oxygen bonds	32	1.68244	8.73649e-18	Q5TCC4,Q4ZFX1,Q53GY4,Q96I59,P47897,Q502Y0,Q9NP81,Q504U6,Q68CR9,Q7Z355,Q9BQR0,Q15031,Q53R85,P12270,Q6IBR2,Q7Z3T4,Q58F23,Q9P2K8,Q9HB23,Q9H3A5,Q6AW83,Q9Y285,Q9HA77,Q53GX7,Q52NV4,P49589,Q9UHN1,P49588,P41252,Q9NSE4,Q9BR63,P54577,P41250,Q6P0M4,Q53HA4,P78534,A6NHW7,Q53T60,Q6PI48,Q9BUZ3,Q9P1N9,O43776,P49590,A6NGN1,O95363,Q7L4K8,Q53HS0,Q3KQZ8,Q9NSD9,Q99968,Q96AW5,P49591,Q15624,Q496C9,A8MVQ3,P56192,P14868,…	1596	47	12983	5.53853	1.10342e-14	1.00311e-15	1.42139e-14
GOTERM_MF_FAT	GO:0004812~aminoacyl-tRNA ligase activity	32	1.68244	8.73649e-18	Q5TCC4,Q4ZFX1,Q53GY4,Q96I59,P47897,Q502Y0,Q9NP81,Q504U6,Q68CR9,Q7Z355,Q9BQR0,Q15031,Q53R85,P12270,Q6IBR2,Q7Z3T4,Q58F23,Q9P2K8,Q9HB23,Q9H3A5,Q6AW83,Q9Y285,Q9HA77,Q53GX7,Q52NV4,P49589,Q9UHN1,P49588,P41252,Q9NSE4,Q9BR63,P54577,P41250,Q6P0M4,Q53HA4,P78534,A6NHW7,Q53T60,Q6PI48,Q9BUZ3,Q9P1N9,O43776,P49590,A6NGN1,O95363,Q7L4K8,Q53HS0,Q3KQZ8,Q9NSD9,Q99968,Q96AW5,P49591,Q15624,Q496C9,A8MVQ3,P56192,P14868,…	1596	47	12983	5.53853	1.10342e-14	1.00311e-15	1.42139e-14
GOTERM_BP_FAT	GO:0034660~ncRNA metabolic process	76	3.99579	4.05264e-17	Q5VVD0,Q9Y2L1,P78316,A8K2Z6,Q86YB5,Q9NP81,P62753,Q53R85,Q14331,Q7Z3T4,Q96Q11,Q2F832,P49589,Q9UHN1,P49588,P41252,Q5VVC8,Q9NSE4,Q5HYW6,Q9BR63,P54577,Q06265,P41250,Q5VVC9,A6NJ44,P78534,Q5HYW4,P46087,O43776,P49590,Q9BUV4,Q9BUV3,Q7L4K8,A6NGN1,Q9NSD9,Q96BS4,P49591,Q7Z3D1,A2A3R6,Q8TEA8,P62249,O15091,A8K3J2,Q12788,Q0VGA5,Q5M7Z9,Q8IY81,Q53XJ4,Q75MN1,P07814,Q7Z3U5,Q4W5J5,Q9H5H1,P50914,A6NI21,P23381,P62847,…	1611	230	13528	2.77475	1.50799e-13	7.53994e-15	7.47248e-14
SP_PIR_KEYWORDS	ligase	77	4.04837	1.46325e-14	Q9NP81,Q5H924,P61077,Q9H7Z5,Q68CU9,Q53R85,Q7Z3T4,Q6IAL5,A4D1L5,P61081,A4D1L6,P59998,Q2HIX7,P49589,P49588,Q9Y4T0,Q5T4S7,P41252,Q9NSE4,Q9BR63,P54577,P41250,P78534,Q8WVW0,O43776,P49590,Q9UQL0,A6NGN1,Q7L4K8,Q9NSD9,P62256,P49591,A8K639,P62837,Q8IWJ0,P22681,Q1RMZ4,Q6UB35,Q8TEA8,Q7Z6F4,A8K945,A8K3J2,Q0VGA5,Q5M7Z9,Q2TBF3,A8K1Z8,A3KMP8,P61088,P61086,O75879,Q13085,Q75MN1,P07814,Q7Z3U5,Q9H5H1,Q9H7G2,P23381,…	1895	305	19235	2.56256	9.29123e-12	3.31846e-13	2.18048e-11
KEGG_PATHWAY	hsa00970:Aminoacyl-tRNA biosynthesis	29	1.52471	6.02438e-14	Q5TCC4,Q4ZFX1,Q53GY4,Q96I59,P47897,Q502Y0,Q9NP81,Q68CR9,Q7Z355,Q9BQR0,Q15031,Q53R85,Q6IBR2,Q7Z3T4,Q9HB23,Q9H3A5,Q6AW83,Q9Y285,Q9HA77,Q53GX7,Q52NV4,P49589,P49588,P41252,Q9NSE4,Q9BR63,P54577,P41250,Q6P0M4,Q53HA4,P78534,A6NHW7,Q53T60,Q6PI48,Q9BUZ3,Q9P1N9,O43776,P49590,A6NGN1,O95363,Q7L4K8,Q53HS0,Q3KQZ8,Q9NSD9,Q96AW5,P49591,Q496C9,A8MVQ3,P56192,P14868,A8K5X5,Q9H9M6,Q57ZJ5,P54136,Q59G75,Q8TEA8,Q5JRF7,…	808	41	5085	4.45137	1.03088e-11	3.43625e-12	7.36189e-11
GOTERM_BP_FAT	GO:0006399~tRNA metabolic process	43	2.26078	1.73145e-11	Q12904,A8K2Z6,Q96I59,Q502Y0,Q9NP81,Q86YB5,Q53R85,P12270,Q7Z3T4,P05455,Q9H3A5,Q96Q11,Q2F832,Q52NV4,Q9UHN1,P49589,P49588,P41252,Q9NSE4,Q9BR63,P54577,P41250,P78534,A6NHW7,O43776,P49590,Q96PZ0,A6NGN1,Q7L4K8,Q9NSD9,Q96BS4,Q9H8R6,P49591,Q59G75,P54136,Q8TEA8,O15091,A8K3J2,Q53XB6,Q0VGA5,Q86YH3,Q5M7Z9,Q96F88,Q53XJ4,Q9UE33,Q75MN1,P07814,Q6MZE5,Q4W5J5,Q7Z3U5,Q32P41,Q53GU6,Q9H5H1,A6NF14,P23381,Q5TCC4,Q4ZFX1,…	1611	118	13528	3.06002	6.44272e-08	1.37079e-09	3.19254e-08
INTERPRO	IPR006195:Aminoacyl-tRNA synthetase, class II, conserved region	14	0.736067	4.20429e-10	P14868,Q96I59,A8K5X5,Q9H9M6,Q9NP81,Q8TEA8,Q68CR9,Q5JRF7,Q53R85,Q6IBR2,A8K3J2,Q0VGA5,A8MSK1,Q5M7Z9,Q9NVT8,Q9HB23,Q9Y285,Q53GX7,Q52NV4,P26639,P41250,Q53HA4,A6NHW7,Q6PI48,Q53T60,A8K8I1,Q75MN1,Q15046,O43776,P49590,P07814,O95363,P12081,Q3KQZ8,Q53GU6,Q9H5H1,P49591,Q496C9	1804	17	16659	7.60487	9.7119e-07	8.829e-08	7.35012e-07
UP_SEQ_FEATURE	short sequence motif:"HIGH" region	14	0.736067	4.27972e-10	Q5TCC4,P56192,Q53GY4,P47897,Q502Y0,P54136,Q59G75,Q7Z355,Q15031,Q9BQR0,Q7Z3T4,Q53XB6,Q86YH3,Q53HG6,Q9H3A5,Q6AW83,Q9HA77,Q9Y2Z4,P49589,Q9NSE4,P41252,A8KAE9,P54577,Q6P0M4,P78534,Q9BUZ3,P26640,Q5JPH6,Q9P1N9,Q5HYE4,P07814,Q7Z3U5,Q6MZE5,A6NGN1,Q7L4K8,Q53HS0,Q3KQZ8,Q96AW5,P23381,A8MVQ3	1886	18	19113	7.88211	1.81802e-06	2.02003e-07	8.00478e-07
UP_SEQ_FEATURE	short sequence motif:"KMSKS" region	13	0.683491	1.022e-09	Q5TCC4,P56192,P47897,Q502Y0,Q59G75,Q7Z355,Q15031,Q9BQR0,Q7Z3T4,Q53XB6,Q86YH3,Q53HG6,Q9H3A5,Q6AW83,Q9HA77,Q9Y2Z4,P49589,P41252,Q9NSE4,A8KAE9,P54577,Q6P0M4,P78534,P26640,Q5JPH6,Q9BUZ3,Q9P1N9,Q5HYE4,P07814,Q7Z3U5,Q6MZE5,A6NGN1,Q7L4K8,Q53HS0,Q3KQZ8,Q96AW5,P23381,A8MVQ3	1886	16	19113	8.23399	4.34143e-06	4.34144e-07	1.91154e-06
INTERPRO	IPR001412:Aminoacyl-tRNA synthetase, class I, conserved site	17	0.893796	1.08832e-07	Q5TCC4,Q53GY4,P47897,Q502Y0,Q7Z355,Q9BQR0,Q15031,Q3L0T1,Q7Z3T4,Q9H3A5,Q6AW83,Q9HA77,P49589,O75165,P41252,Q9NSE4,P10515,P54577,Q6P0M4,P78534,Q9BUZ3,Q9P1N9,Q7L4K8,A6NGN1,Q01991,Q53HS0,Q9HAN0,Q3KQZ8,Q96AW5,Q7Z3W5,Q15067,A8MVQ3,Q0D2M7,P56192,Q53EP3,Q59G75,P54136,Q53XB6,Q86YH3,Q16791,Q53HG6,Q9Y2Z4,A8KAE9,P26640,Q5JPH6,Q5HYE4,P07814,Q7Z3U5,Q6MZE5,Q86YI5,P23381	1804	34	16659	4.61724	0.000251371	1.32316e-05	0.000190265
INTERPRO	IPR014729:Rossmann-like alpha/beta/alpha sandwich fold	17	0.893796	1.64649e-06	Q5TCC4,Q53GY4,P47897,Q502Y0,P49915,Q7Z355,Q9BQR0,Q15031,Q7Z3T4,Q9H3A5,Q5T6L5,Q5T6L4,Q6AW83,Q9HA77,Q53F90,P49589,P41252,Q9NSE4,P54577,Q6P0M4,P78534,Q9BUZ3,Q9P1N9,Q7L4K8,A6NGN1,Q86Y88,Q53HS0,Q96AW5,Q5T6L6,A8MVQ3,P56192,A8K639,P49585,P54136,Q59G75,P08243,Q53XB6,Q8NFZ7,Q86YH3,Q53HG6,P00966,Q9Y2Z4,A8KAE9,A4D1I8,P26640,Q5JPH6,Q5HYE4,Q7Z3U5,Q6MZE5,P23381	1804	40	16659	3.92465	0.00379618	0.000158462	0.00287843
Annotation Cluster 15	Enrichment Score: 10.92041129964124
Category	Term	Count	%	PValue	Genes	List Total	Pop Hits	Pop Total	Fold Enrichment	Bonferroni	Benjamini	FDR
GOTERM_BP_FAT	GO:0006732~coenzyme metabolic process	54	2.83912	1.39043e-13	Q9NUZ0,Q75MT9,Q0QF12,Q8N5H5,P53597,Q68D62,Q9NZB8,Q9UMF8,Q6FHQ6,Q6IAL5,Q6FII1,P53396,Q2Q9B7,Q86TQ8,Q6FHI2,Q8N3W6,Q86SW4,Q53EK4,P13995,Q9Y4T0,Q8N3W7,Q0PHS1,Q6PJX4,P10515,Q53HE2,Q03504,Q6LE88,Q0PHS4,O43837,P48163,A8K290,Q6LEN1,Q9H2R8,Q8WVW0,Q53TP1,Q7Z503,Q6FHZ0,Q71UF1,Q6FI37,Q9HAN0,Q59FY4,Q6NR85,Q8N922,Q96AM7,Q6IBS5,Q7Z7M7,Q7Z7M6,Q7LDY7,Q7Z7M5,Q7Z7M4,Q6P4H0,P09622,Q1RMZ4,Q86TX2,Q6UB35,Q7Z3V0,P31040,…	1611	153	13528	2.96374	5.17219e-10	1.66844e-11	2.56295e-10
GOTERM_BP_FAT	GO:0006084~acetyl-CoA metabolic process	20	1.05152	8.46437e-11	Q9NUZ0,Q75MT9,Q8N5H5,Q0QF12,P53597,P48735,Q6FHQ6,Q6IAL5,Q0QEL2,Q7Z5G3,Q96I99,Q9UIC5,Q86TQ8,P36957,A8K414,Q6LEQ7,Q13423,Q86SW4,P40925,P40926,Q9Y4T0,P10515,O43837,Q16187,Q2TB59,P11177,Q7Z503,Q6FHZ0,Q53GF8,Q71UF1,Q01991,Q6FI37,Q9HAN0,Q59FY4,Q3ZCW5,Q75MP7,Q5T9Q4,Q5T9Q5,Q9P2R7,Q5T9Q6,Q7Z5W8,Q6IBS5,Q0QF37,Q9Y436,Q7LDY7,Q0QER2,Q53EP3,Q1RMZ4,P09622,Q8IW48,Q7Z3V0,P31040,A8K5J6,Q567U4,Q86TW7,Q9H7Q4,Q6N0B1,…	1611	31	13528	5.41759	3.14959e-07	5.43033e-09	1.5607e-07
GOTERM_BP_FAT	GO:0051186~cofactor metabolic process	57	2.99685	1.47239e-10	Q9NUZ0,Q75MT9,Q8N5H5,Q0QF12,P53597,Q68D62,P09601,Q9NZB8,Q9UMF8,Q68Y91,Q6FHQ6,Q6IAL5,Q6FII1,P53396,Q2Q9B7,Q86TQ8,Q6FHI2,Q8N3W6,Q86SW4,Q53EK4,P13995,Q9Y4T0,Q8N3W7,Q0PHS1,Q6PJX4,P10515,Q53HE2,Q03504,Q6LE88,Q0PHS4,O43837,P48163,A8K290,Q6LEN1,Q9H2R8,Q8WVW0,Q53TP1,Q7Z503,Q6FHZ0,Q71UF1,Q6FI37,Q9HAN0,Q59FY4,Q6NR85,Q8N922,Q96AM7,Q6IBS5,Q7Z7M7,Q7Z7M6,Q7LDY7,Q7Z7M5,Q7Z7M4,Q6P4H0,P09622,Q1RMZ4,Q86TX2,P53004,…	1611	195	13528	2.45459	5.47877e-07	8.83673e-09	2.71488e-07
Annotation Cluster 16	Enrichment Score: 10.260629754394465
Category	Term	Count	%	PValue	Genes	List Total	Pop Hits	Pop Total	Fold Enrichment	Bonferroni	Benjamini	FDR
GOTERM_BP_FAT	GO:0006007~glucose catabolic process	33	1.73502	1.9605e-15	Q75MT9,P04406,Q9UMF8,Q9NP11,Q2Q9B7,P08559,Q8WUW7,P29803,Q9BT62,Q5JPU1,P18669,Q5JPU2,Q92934,Q0PHS1,Q5JPU0,Q53HE2,Q5VSR8,P10515,Q5VSR7,Q0PHS4,Q99724,Q5JPU3,Q99725,Q6FHZ0,Q53H41,P36871,P00558,Q53X65,Q9HAN0,Q5JPN2,P15259,Q6FH21,Q6LCA3,Q01813,Q16106,Q2TSD0,P04075,Q5TYJ8,Q5JPT8,Q5JPT9,Q96GV1,O95336,Q5ZEY3,Q16791,Q9NYI7,A6NFK3,P51854,P60174,P37837,P07205,P00338,P78557,P07195,Q49A26,Q6FHP9,Q16715,Q86YI5,…	1611	58	13528	4.77776	7.43605e-12	2.97429e-13	3.68594e-12
GOTERM_BP_FAT	GO:0046365~monosaccharide catabolic process	35	1.84017	6.64963e-14	Q75MT9,P04406,A8K516,Q9UMF8,Q9NP11,Q2Q9B7,P08559,Q8WUW7,P29803,Q9BT62,Q5JPU1,P18669,Q92934,Q5JPU2,Q0PHS1,Q5JPU0,Q5VSR8,Q53HE2,P10515,Q5VSR7,Q0PHS4,Q99724,Q5JPU3,Q99725,Q6FHZ0,Q53H41,P36871,P00558,Q53X65,Q9HAN0,Q5JPN2,P15259,Q6FH21,Q6LCA3,Q01813,Q16106,Q2TSD0,P04075,Q5TYJ8,Q5JPT8,Q5JPT9,P46926,Q96GV1,O95336,Q5ZEY3,Q16791,Q9NYI7,A6NFK3,P51854,P37837,P60174,P07205,P00338,P78557,P07195,Q49A26,Q6FHP9,…	1611	71	13528	4.1395	2.47455e-10	8.24851e-12	1.22624e-10
GOTERM_BP_FAT	GO:0019320~hexose catabolic process	33	1.73502	1.10412e-12	Q75MT9,P04406,Q9UMF8,Q9NP11,Q2Q9B7,P08559,Q8WUW7,P29803,Q9BT62,Q5JPU1,P18669,Q5JPU2,Q92934,Q0PHS1,Q5JPU0,Q53HE2,Q5VSR8,P10515,Q5VSR7,Q0PHS4,Q99724,Q5JPU3,Q99725,Q6FHZ0,Q53H41,P36871,P00558,Q53X65,Q9HAN0,Q5JPN2,P15259,Q6FH21,Q6LCA3,Q01813,Q16106,Q2TSD0,P04075,Q5TYJ8,Q5JPT8,Q5JPT9,Q96GV1,O95336,Q5ZEY3,Q16791,Q9NYI7,A6NFK3,P51854,P60174,P37837,P07205,P00338,P78557,P07195,Q49A26,Q6FHP9,Q16715,Q86YI5,…	1611	69	13528	4.01609	4.10842e-09	1.17383e-10	2.03583e-09
GOTERM_BP_FAT	GO:0044275~cellular carbohydrate catabolic process	37	1.94532	1.26973e-12	P04406,Q75MT9,A8K516,Q9UMF8,Q9NP11,Q2Q9B7,P08559,Q8WUW7,P29803,Q9BT62,Q5JPU1,P18669,Q92934,Q5JPU2,Q0PHS1,Q5JPU0,Q5VSR8,Q53HE2,P10515,Q5VSR7,Q0PHS4,Q99724,Q5JPU3,Q99725,Q6FHZ0,Q53H41,P36871,P00558,Q53X65,Q9HAN0,Q5JPN2,P15259,Q6FH21,Q6LCA3,Q01813,Q2TSD0,Q16106,P04075,Q5TYJ8,Q5JPT8,Q5JPT9,P46926,Q96GV1,O95336,P11217,Q5ZEY3,Q16791,Q9NYI7,P11216,A6NFK3,P51854,P37837,P60174,P07205,P00338,P78557,P07195,…	1611	85	13528	3.65528	4.72478e-09	1.27697e-10	2.34126e-09
GOTERM_BP_FAT	GO:0046164~alcohol catabolic process	36	1.89274	1.28043e-12	Q75MT9,P04406,A8K516,Q9UMF8,Q9NP11,Q2Q9B7,P08559,Q8WUW7,P29803,A8MPV9,Q9BT62,Q5JPU1,P18669,Q92934,Q5JPU2,Q0PHS1,Q5JPU0,Q5VSR8,Q53HE2,P10515,Q5VSR7,Q0PHS4,Q99724,Q5JPU3,Q99725,Q6FHZ0,Q53H41,P36871,P00558,Q53X65,Q9HAN0,Q5JPN2,P15259,Q6FH21,Q6LCA3,Q01813,Q16106,Q2TSD0,P04075,Q5TYJ8,Q5JPT8,Q5JPT9,P46926,Q96GV1,O95336,Q5ZEY3,Q16791,Q9NYI7,A6NFK3,P51854,P37837,P60174,P07205,P00338,P78557,P07195,Q49A26,…	1611	81	13528	3.73212	4.76444e-09	1.2538e-10	2.36091e-09
GOTERM_BP_FAT	GO:0006096~glycolysis	26	1.36698	7.02708e-12	Q75MT9,P04406,Q9NP11,P08559,Q8WUW7,P29803,Q9BT62,Q5JPU1,Q5JPU2,P18669,Q5JPU0,Q53HE2,Q5VSR8,P10515,Q5VSR7,Q99724,Q5JPU3,Q99725,Q6FHZ0,Q53H41,P36871,Q53X65,P00558,Q9HAN0,Q5JPN2,P15259,Q6LCA3,Q01813,Q16106,Q2TSD0,P04075,Q5JPT8,Q5JPT9,Q96GV1,Q5ZEY3,Q16791,Q9NYI7,A6NFK3,P60174,P07205,P00338,P78557,P07195,Q6FHP9,Q16715,Q86YI5,Q49A78,Q16716,Q9UCH6,Q6FI10,P14618,Q5U077,Q53G35,Q504U3,P30613,P06733,Q0QET7,…	1611	47	13528	4.6453	2.61476e-08	6.08085e-10	1.29568e-08
SP_PIR_KEYWORDS	glycolysis	22	1.15668	1.39837e-10	Q53G35,P04406,Q504U3,P30613,P06733,Q0QET7,Q16768,Q9NP11,A8MXQ4,Q53HR3,Q53GE3,P08559,Q8WUW7,P29803,Q9BT62,Q6FHU2,Q53FT9,Q5JPU1,P18669,Q5JPU2,Q5JPU0,Q53HE2,Q5VSR8,P10515,Q5VSR7,P06744,Q99724,Q5JPU3,Q02218,Q99725,Q8WTZ9,P09972,P11177,Q53H41,P00558,Q53X65,Q9UK31,Q01991,Q9HAN0,Q5JPN2,P15259,Q2QD09,Q6FHK8,Q9BRD3,Q8N0Y7,Q6LCA3,Q01813,Q2TSD0,P04075,Q53EP3,Q5JPT8,Q5JPT9,Q9UCN2,Q96GV1,Q5ZEY3,Q16791,Q9NYI7,…	1895	44	19235	5.0752	8.86564e-08	2.39612e-09	2.08086e-07
GOTERM_BP_FAT	GO:0006006~glucose metabolic process	48	2.52366	3.75751e-10	P04406,Q75MT9,Q12904,Q9UMF8,Q9UPN1,Q9NP11,Q2Q9B7,P08559,Q8WUW7,P29803,Q8N3W6,Q9BT62,Q5JPU1,P18669,Q92934,Q5JPU2,Q8WUQ0,Q8NCK6,Q8N3W7,Q5JPU0,Q0PHS1,Q5VSR8,Q53HE2,P10515,O60701,Q5VSR7,Q86VS1,Q5JPU3,Q99724,Q0PHS4,Q99725,Q9UGJ0,Q6FHZ0,Q53H41,P36871,P00558,Q53X65,Q9HAN0,Q5JPN2,P15259,Q6FH21,Q16851,Q6LCA3,Q01813,Q2TSD0,Q16106,P04075,Q5TYJ8,Q5JPT8,Q5JPT9,Q96GV1,A6NNR3,O95336,P11217,Q5ZEY3,Q16791,P01106,…	1611	153	13528	2.63444	1.39817e-06	2.08682e-08	6.9283e-07
GOTERM_BP_FAT	GO:0016052~carbohydrate catabolic process	37	1.94532	4.95486e-09	P04406,Q75MT9,A8K516,Q9UMF8,Q9NP11,Q2Q9B7,P08559,Q8WUW7,P29803,Q9BT62,Q5JPU1,P18669,Q92934,Q5JPU2,Q0PHS1,Q5JPU0,Q5VSR8,Q53HE2,P10515,Q5VSR7,Q0PHS4,Q99724,Q5JPU3,Q99725,Q6FHZ0,Q53H41,P36871,P00558,Q53X65,Q9HAN0,Q5JPN2,P15259,Q6FH21,Q6LCA3,Q01813,Q2TSD0,Q16106,P04075,Q5TYJ8,Q5JPT8,Q5JPT9,P46926,Q96GV1,O95336,P11217,Q5ZEY3,Q16791,Q9NYI7,P11216,A6NFK3,P51854,P37837,P60174,P07205,P00338,P78557,P07195,…	1611	109	13528	2.85045	1.84369e-05	2.42592e-07	9.13604e-06
KEGG_PATHWAY	hsa00010:Glycolysis / Gluconeogenesis	28	1.47213	7.84407e-08	P04406,Q68CU9,Q9NP11,P08559,Q8WUW7,P29803,Q6PKA6,Q9BT62,Q9NR19,Q5JPU1,P18669,Q5JPU2,Q5JPU0,Q53HE2,Q5VSR8,P10515,Q5VSR7,Q99724,Q5JPU3,Q99725,Q53H41,P36871,Q53X65,P00558,Q9HAN0,Q5JPN2,P15259,Q6LCA3,Q01813,Q16106,Q2TSD0,P04075,Q5JPT8,Q5JPT9,P11766,Q1RMZ4,P09622,Q96GV1,Q6IRT1,Q9H7Q4,Q5ZEY3,Q6ZV30,Q16791,Q9NYI7,Q8N9T9,Q5QPH3,A6NFK3,P07205,P60174,Q9NUB1,P00338,P78557,P07195,Q6FHP9,Q16715,Q86YI5,Q16716,…	808	60	5085	2.93688	1.34133e-05	2.23556e-06	9.5791e-05
GOTERM_BP_FAT	GO:0019318~hexose metabolic process	50	2.62881	1.31008e-07	P04406,Q75MT9,Q12904,Q9UPN1,Q9UMF8,Q9NP11,Q2Q9B7,P08559,Q8WUW7,P29803,Q8N3W6,Q9BT62,Q5JPU1,Q92934,Q5JPU2,P18669,Q8WUQ0,Q8NCK6,Q8N3W7,Q5JPU0,Q0PHS1,P10515,Q53HE2,Q5VSR8,Q86VS1,O60701,Q5VSR7,Q5JPU3,Q99724,Q0PHS4,Q99725,Q9UGJ0,A8K672,Q6FHZ0,Q53H41,P36871,Q53X65,P00558,Q9HAN0,Q5JPN2,P15259,Q6FH21,Q16851,Q6LCA3,Q01813,Q2TSD0,Q16106,P04075,Q5TYJ8,Q5JPT8,Q5JPT9,A6NNR3,Q96GV1,O95336,P11217,Q5ZEY3,Q16791,…	1611	192	13528	2.18679	0.000487361	5.6032e-06	0.000241559
GOTERM_BP_FAT	GO:0005996~monosaccharide metabolic process	55	2.89169	1.69446e-07	P04406,Q75MT9,A8K516,Q12904,Q59EA7,Q9UMF8,Q9UPN1,Q9NP11,Q2Q9B7,P08559,Q8WUW7,P29803,Q8N3W6,Q9BT62,Q5JPU1,Q92934,Q5JPU2,P18669,Q8WUQ0,Q8NCK6,Q8N3W7,Q5JPU0,Q0PHS1,P10515,Q53HE2,Q5VSR8,Q86VS1,O60701,Q5VSR7,Q5JPU3,Q99724,Q0PHS4,Q99725,Q9UGJ0,A8K672,Q6FHZ0,Q53H41,P36871,Q53X65,P00558,Q9HAN0,Q5JPN2,P15259,Q6FH21,Q16851,Q6LCA3,Q01813,Q2TSD0,Q16106,P04075,Q5TYJ8,Q5JPT8,Q5JPT9,P46926,A6NNR3,Q96GV1,O95336,…	1611	222	13528	2.0804	0.000630309	6.92863e-06	0.000312433
Annotation Cluster 17	Enrichment Score: 9.8613859342743
Category	Term	Count	%	PValue	Genes	List Total	Pop Hits	Pop Total	Fold Enrichment	Bonferroni	Benjamini	FDR
GOTERM_MF_FAT	GO:0048037~cofactor binding	69	3.62776	8.05453e-11	A4QPB4,Q9NUZ0,P00367,Q8N5H5,A8K6Y3,Q7L124,Q6FHQ6,Q53XZ9,Q86TQ8,Q2Q9B7,Q6YNQ1,Q0PHS1,P10515,O60701,Q0PHS4,Q6YP21,Q53ET4,Q53X65,Q6FI37,Q9HAN0,Q9BUT1,Q16836,Q6FI31,Q5HYG8,Q15067,Q5HYG7,Q5T7G6,Q6TCH8,Q1L6K4,P23368,Q5T7G5,Q53T69,Q2TSD0,Q1L6K6,A8MWG9,Q9UC85,P04040,P11766,P09874,Q4LE83,Q6IRT1,Q7Z3V0,Q8NAS5,P11310,P11217,Q5ZEY3,P11216,Q9UCI8,Q13587,Q13584,Q6FIA4,Q5T4U4,Q13630,P07108,Q5T4U5,Q9BUX5,Q53GL5,…	1596	249	12983	2.2542	1.01729e-07	5.6516e-09	1.31044e-07
SP_PIR_KEYWORDS	oxidoreductase	105	5.5205	1.52994e-10	P17516,A4QPB4,Q9NUZ0,P00367,Q8N5H5,Q5H9R2,Q68D62,A8K6Y3,Q6FHQ6,Q59H27,Q2Q9B7,Q53XZ9,Q6YNQ1,P00352,Q5JPU1,P13995,Q5JPU2,Q0PHS1,Q6PJX4,Q6TGM4,Q5JPU0,O60701,Q0PHS4,O60218,Q5JPU3,Q8WW71,Q6LEN1,P13073,P23921,Q53X65,Q6FI37,Q9BUT1,Q6NR85,Q6FI31,Q16836,Q8N922,Q9P1A0,Q15067,Q5HYG7,Q96AM7,Q6TCH8,Q1L6K4,Q6LCA3,P23368,Q5SYR1,Q2TSD0,Q6LCK9,Q53T69,A4D0W4,Q1L6K6,Q4VXZ8,A8MWG9,Q5JPT8,Q5JPT9,Q9UC85,P04040,Q7M4N1,…	1895	562	19235	1.89643	9.69984e-08	2.55259e-09	2.27665e-07
GOTERM_MF_FAT	GO:0050662~coenzyme binding	55	2.89169	2.1141e-10	Q9NUZ0,A4QPB4,P04406,P00367,Q8N5H5,Q0QF12,Q9H845,A8K6Y3,Q68Y91,Q7L124,Q8TBJ0,Q6FHQ6,Q4W5B4,Q9T2V8,Q2Q9B7,Q86TQ8,P15559,Q53XZ9,Q9UES8,Q5RZ99,Q86SW4,Q6YNQ1,Q0PHS1,Q53S12,P10515,Q03504,Q53TA2,O60701,Q0PHS4,O43837,P48163,Q53X65,Q6FI37,Q9BUT1,Q9HAN0,Q6FI31,Q16836,Q8TAK2,O00154,Q15067,Q5HYG7,Q6IBS5,Q1L6K4,Q6TCH8,P23368,Q2TSD0,Q53T69,Q7LDY7,Q1L6K6,A8MWG9,P04040,Q9UC85,Q6ZR44,P11766,P09622,P09874,Q7Z3V0,…	1596	181	12983	2.47187	2.67011e-07	1.40532e-08	3.43957e-07
Annotation Cluster 18	Enrichment Score: 9.557857540912023
Category	Term	Count	%	PValue	Genes	List Total	Pop Hits	Pop Total	Fold Enrichment	Bonferroni	Benjamini	FDR
GOTERM_CC_FAT	GO:0005856~cytoskeleton	237	12.4606	3.565e-12	P07437,Q96H99,Q2TU64,Q53S90,Q32Q12,Q7Z794,Q6NT82,P13645,Q05CI5,Q8WXH0,P59998,Q548L2,Q96SB3,Q9GZN1,Q5I6Y6,Q13464,Q99426,Q5I6Y4,Q5I6Y5,A8K0X6,Q32Q22,Q59ER5,Q5TZP9,Q59F36,Q5TZP7,Q99439,P52565,P52566,Q7Z4D2,Q4VBY4,Q5H9P1,Q53GK6,Q53GK7,O75083,P01106,A4D177,A8K6E9,P63104,Q6AI02,P63313,A4D0V4,Q7Z757,Q8TC62,Q6UR97,Q6UR98,A1L4L2,Q96C61,Q86VD2,A6NJQ0,Q6ZNL4,Q59GR8,Q59EP1,Q5SYX2,Q6I9T8,Q5SYX0,P35221,A1XKG3,…	1438	1381	12782	1.52544	2.3351e-09	6.31107e-11	5.32847e-09
SP_PIR_KEYWORDS	cytoskeleton	118	6.204	1.57199e-11	Q596K9,Q8NF52,Q96H99,A2RUU9,Q9BR76,A2A418,Q562S2,Q4W4Y1,Q562S0,Q86TQ3,P07737,Q6NT82,Q562R2,Q562R8,Q8WXH0,P59998,A7E2X7,Q96SB3,Q5TBN4,Q9GZN1,Q13464,Q99426,Q6FGY5,O75369,Q5TBN3,Q562R1,P14635,Q6MZP0,Q9BV73,P67775,Q59FP5,Q59ER5,P13796,Q5TZP9,Q59F36,Q5T2U1,P07951,Q7Z4D2,Q9UPH5,Q6IPL3,Q05193,Q53GK6,Q2VIQ3,Q53QU3,Q562P0,O75083,A8K6E9,Q6LCB2,P63313,Q8WUG4,Q96FU6,Q8TC62,Q96C61,Q86VD2,Q59GR8,Q59EP1,Q6I9T8,…	1895	636	19235	1.88325	9.9664e-09	3.1145e-10	2.33922e-08
GOTERM_CC_FAT	GO:0015630~microtubule cytoskeleton	108	5.67823	5.43575e-09	P07437,A2RUU9,Q4W4Y1,Q32Q12,Q05CI5,P59998,A7E2X7,Q59G27,Q2Q9B7,Q2YDC5,Q13464,Q99426,Q6FGY5,A8K0X6,Q32Q22,P14635,Q9BV73,Q9UPG3,P67775,Q86TP8,Q5TZP9,Q59F36,Q5T2U1,Q5TZP7,O75376,Q4VBY4,Q9UPH5,A8K5E3,Q5H9P1,Q6IPL3,Q05193,Q2VIQ3,Q53QU3,P01106,A4D177,Q5HYH5,Q6LCB2,Q8WUG4,Q7Z757,Q8TC62,Q6UR97,Q6UR98,A1L4L2,Q86VD2,A6NJQ0,Q6ZNL4,Q59EP1,Q86WG4,Q6I9T8,Q5SYX2,Q5SYX0,Q8NCY0,Q5H9N4,A6NHL2,Q96HX0,O75592,Q8NHX6,…	1438	549	12782	1.7486	3.56041e-06	7.74004e-08	8.12452e-06
GOTERM_CC_FAT	GO:0044430~cytoskeletal part	163	8.56993	1.92664e-08	P07437,Q8TAR2,A2RUU9,Q4W4Y1,Q32Q12,Q7Z794,Q6NT82,P13645,Q05CI5,P59998,A7E2X7,Q2Q9B7,Q59G27,P17661,P14649,Q548L2,Q96SB3,Q5TBN4,Q2YDC5,Q99426,Q5I6Y6,Q13464,Q5I6Y4,Q6FGY5,Q5I6Y5,A8K0X6,Q5TBN3,Q32Q22,P14635,Q9BV73,Q9UPG3,P67775,Q59FP5,Q86TP8,Q5TZP9,P13796,Q59F36,Q5T2U1,Q5TZP7,P07951,O75376,Q4VBY4,Q9UPH5,A8K5E3,Q5H9P1,Q6IPL3,A7MD22,Q05193,Q53QU3,Q2VIQ3,P01106,A4D177,P63104,Q5HYH5,Q6LCB2,Q5T0S2,A4D0V4,…	1438	952	12782	1.52192	1.26194e-05	2.62907e-07	2.87965e-05
Annotation Cluster 19	Enrichment Score: 9.329254899488618
Category	Term	Count	%	PValue	Genes	List Total	Pop Hits	Pop Total	Fold Enrichment	Bonferroni	Benjamini	FDR
GOTERM_BP_FAT	GO:0034660~ncRNA metabolic process	76	3.99579	4.05264e-17	Q5VVD0,Q9Y2L1,P78316,A8K2Z6,Q86YB5,Q9NP81,P62753,Q53R85,Q14331,Q7Z3T4,Q96Q11,Q2F832,P49589,Q9UHN1,P49588,P41252,Q5VVC8,Q9NSE4,Q5HYW6,Q9BR63,P54577,Q06265,P41250,Q5VVC9,A6NJ44,P78534,Q5HYW4,P46087,O43776,P49590,Q9BUV4,Q9BUV3,Q7L4K8,A6NGN1,Q9NSD9,Q96BS4,P49591,Q7Z3D1,A2A3R6,Q8TEA8,P62249,O15091,A8K3J2,Q12788,Q0VGA5,Q5M7Z9,Q8IY81,Q53XJ4,Q75MN1,P07814,Q7Z3U5,Q4W5J5,Q9H5H1,P50914,A6NI21,P23381,P62847,…	1611	230	13528	2.77475	1.50799e-13	7.53994e-15	7.47248e-14
GOTERM_BP_FAT	GO:0022613~ribonucleoprotein complex biogenesis	64	3.36488	4.05027e-16	A6NLW5,Q5VVD0,Q9Y2L1,P78316,Q59GX9,Q5T3R7,Q5T3R8,P62753,Q14331,A2RUM7,Q9P172,Q5ZF01,Q53HM6,A8K086,Q8TEQ6,Q59EK7,Q6PJF7,P39019,Q5HYW6,Q4W5P5,Q5VVC8,Q06265,Q05823,Q5VVC9,O00567,O00566,Q6NZY0,Q5HYW4,Q5T8U2,Q53GS0,Q9Y237,P46087,Q5T8U4,Q9BUV4,Q14684,Q9BUV3,P61254,A8K9T4,Q96BS4,Q8WYP1,Q53GS9,Q92879,Q59GY3,Q96DV6,Q53HW2,Q15459,Q5XPV6,Q7Z3D1,Q6NSF2,Q8IXG0,A2A3R6,Q14978,Q9Y2W2,Q69YP1,Q5T8J2,P62249,Q6P1R0,…	1611	180	13528	2.9857	1.65246e-12	7.18314e-14	8.21565e-13
GOTERM_BP_FAT	GO:0042254~ribosome biogenesis	42	2.2082	2.352e-10	Q5VVD0,Q9Y2L1,P78316,Q59GX9,Q5T3R7,Q5T3R8,P62753,Q14331,A2RUM7,P39019,Q5HYW6,Q5VVC8,Q4W5P5,Q06265,Q05823,Q5VVC9,O00567,O00566,Q5HYW4,Q5T8U2,Q53GS0,Q9Y237,P46087,Q5T8U4,Q14684,Q9BUV4,Q9BUV3,P61254,Q8WYP1,Q96BS4,Q96DV6,Q53HW2,Q6NSF2,Q7Z3D1,A2A3R6,Q14978,Q9Y2W2,Q5T8J2,P62249,Q1RLL8,Q12788,Q53HK9,Q6PJM8,Q9NX34,Q96A78,P05388,Q8IY81,P83731,Q6IBH6,O00541,Q4W5J5,P50914,A6NI21,A6NNZ9,Q32LZ3,Q08ES8,Q08ES9,…	1611	122	13528	2.89086	8.75181e-07	1.34643e-08	4.33675e-07
GOTERM_BP_FAT	GO:0006364~rRNA processing	33	1.73502	8.42014e-09	Q5VV70,Q3MHV0,Q5VVD0,P78316,Q9Y2L1,Q45RF0,Q59GX9,P62753,Q5W0L2,Q9NV06,A2RUM7,Q14331,Q6AI46,Q59GD6,Q9Y2X3,P39019,Q4W5P5,Q5VVC8,Q5HYW6,Q49AG4,Q06265,P62913,Q3KQU0,Q05823,Q5VVC9,O00567,Q6IRW4,O00566,Q5HYW4,Q6IPH7,P22087,Q6IBQ2,P62312,Q9Y237,P46087,Q14684,Q9BUV4,Q9BUV3,P61254,Q15024,Q52M21,Q5T0P7,Q5T0P8,Q8WYP1,Q96BS4,Q96DV6,P18124,Q7Z3D1,A2A3R6,P46777,Q14978,Q9Y2W2,Q6IPX4,P62249,Q1RLL8,Q12788,P38919,…	1611	92	13528	3.01206	3.13309e-05	3.96599e-07	1.55255e-05
GOTERM_BP_FAT	GO:0016072~rRNA metabolic process	33	1.73502	2.72715e-08	Q5VV70,Q3MHV0,Q5VVD0,P78316,Q9Y2L1,Q45RF0,Q59GX9,P62753,Q5W0L2,Q9NV06,A2RUM7,Q14331,Q6AI46,Q59GD6,Q9Y2X3,P39019,Q4W5P5,Q5VVC8,Q5HYW6,Q49AG4,Q06265,P62913,Q3KQU0,Q05823,Q5VVC9,O00567,Q6IRW4,O00566,Q5HYW4,Q6IPH7,P22087,Q6IBQ2,P62312,Q9Y237,P46087,Q14684,Q9BUV4,Q9BUV3,P61254,Q15024,Q52M21,Q5T0P7,Q5T0P8,Q8WYP1,Q96BS4,Q96DV6,P18124,Q7Z3D1,A2A3R6,P46777,Q14978,Q9Y2W2,Q6IPX4,P62249,Q1RLL8,Q12788,P38919,…	1611	96	13528	2.88656	0.000101472	1.26846e-06	5.02846e-05
GOTERM_BP_FAT	GO:0034470~ncRNA processing	48	2.52366	3.81857e-07	Q5VVD0,P78316,Q9Y2L1,A8K2Z6,Q59GX9,Q86YB5,P62753,P84022,A2RUM7,Q14331,P05455,Q59F45,Q96Q11,Q2F832,P49588,P39019,Q5HYW6,Q4W5P5,Q5VVC8,Q06265,Q05823,Q5VVC9,A6NJ44,O00567,O00566,Q5HYW4,Q9Y237,P46087,Q14684,Q9BUV4,Q96PZ0,Q9BUV3,P61254,Q8WYP1,Q96BS4,Q96DV6,Q9H8R6,P49591,Q8N201,Q7Z3D1,Q9BT91,A2A3R6,Q14978,Q9Y2W2,P62249,Q1RLL8,O15091,Q0VGA5,Q12788,Q96F88,Q53XR6,Q6PJM8,Q96A78,Q8IY81,Q6IBH6,O00541,Q53XJ4,…	1611	187	13528	2.15545	0.00141988	1.46482e-05	0.000704086
SP_PIR_KEYWORDS	rrna processing	13	0.683491	0.0146429	P78316,Q9Y2L1,Q9Y2W2,Q8IY81,Q4W5P5,Q49AG4,Q06265,O00541,O00566,P22087,Q9NV06,Q6IBQ2,P62312,Q14331,Q4W5J5,Q15024,A8K775,Q96BS4,A6NI21,A6NNZ9,P38919	1895	61	19235	2.1632	0.999913	0.0689022	19.7085
Annotation Cluster 20	Enrichment Score: 9.139263172588644
Category	Term	Count	%	PValue	Genes	List Total	Pop Hits	Pop Total	Fold Enrichment	Bonferroni	Benjamini	FDR
SP_PIR_KEYWORDS	helicase	47	2.47108	9.59026e-15	P51531,Q6VMB5,Q9ULG1,A6NML1,Q59GX6,A8K6G2,P13984,O00571,Q5W0H3,P51532,Q3SWU7,Q59H21,Q59G92,Q4W5G3,Q9P172,Q53T09,Q05CI5,Q59FQ9,Q13283,A8K8Q2,Q5ZF01,O00148,Q9NUK2,Q7Z4X3,Q6IC76,Q8IYB8,Q8IYH0,P17844,Q2NL95,Q6NZY0,P60842,Q32Q22,Q4W5H1,O95786,Q96L91,Q7Z4W0,Q0VGL8,Q4V9L5,Q53TI6,Q9H2U1,Q7Z2V5,Q96KE7,P12956,Q7L014,P54132,Q32P45,Q4ZG72,Q5JR04,Q8NAR9,Q0Z7V0,Q6ZP53,Q3B797,Q6FI03,Q9NZE6,Q6FG89,Q9H8B9,Q14839,…	1895	134	19235	3.56021	6.05338e-12	2.24154e-13	1.42109e-11
GOTERM_MF_FAT	GO:0016887~ATPase activity	93	4.88959	1.97418e-14	Q9ULG1,Q6VMB5,O75351,O75964,A8K6G2,P13984,Q3SWU9,Q9UE82,Q59GA5,Q3SWU7,Q59H21,P11142,Q09028,Q4W5G3,Q05CI5,Q59FQ9,A8K8Q2,Q9NUK2,Q7Z4X3,Q96BE0,A6NN54,Q6VBB7,Q6AI22,Q8TAS0,Q8IYH0,Q32Q22,Q9UKV3,Q6NW36,Q4W5H1,O95786,Q7Z4W0,Q4V9L5,Q6P1Q8,Q53TI6,P35998,Q7Z2V5,P43686,Q96KE7,Q4ZG72,Q60FE2,Q0ZAI9,Q0Z7V0,Q6ZP53,Q6FI03,A8K6E7,Q53HK8,Q6FG89,Q14839,Q53XJ6,Q53GZ6,Q7GY08,Q7Z759,Q13838,P06576,A7E2E1,Q96T23,Q86XU5,…	1596	334	12983	2.26505	2.49594e-11	1.91991e-12	3.21521e-11
SMART	SM00490:HELICc	39	2.05047	5.37337e-13	P51531,Q6VMB5,Q9ULG1,A6NML1,Q59GX6,A8K6G2,O00571,P51532,Q3SWU7,Q59H21,Q59G92,Q4W5G3,Q9P172,Q05CI5,Q59FQ9,A8K8Q2,Q5ZF01,O00148,Q9NUK2,Q7Z4X3,Q8IYB8,Q8IYH0,P17844,Q2NL95,Q6NZY0,P60842,Q32Q22,Q4W5H1,O95786,Q7Z4W0,Q4V9L5,Q0VGL8,Q53TI6,Q9H2U1,Q7Z2V5,Q96KE7,Q7L014,P54132,Q4ZG72,Q8NAR9,Q3B797,Q9NZE6,Q9H8B9,Q2TAZ1,Q14839,Q53XJ6,Q3B7X0,O60264,Q13838,Q92499,A7E2E1,Q59E92,Q9GZR7,Q5JWW0,Q96B07,Q5CZ96,Q5HYT6,…	909	106	9079	3.67479	1.55831e-10	7.79155e-11	7.14351e-10
SMART	SM00487:DEXDc	39	2.05047	1.46806e-12	P51531,Q6VMB5,Q9ULG1,A6NML1,Q59GX6,A8K6G2,O00571,P51532,Q3SWU7,Q59H21,Q59G92,Q4W5G3,Q9P172,Q05CI5,Q59FQ9,A8K8Q2,Q5ZF01,O00148,Q9NUK2,Q7Z4X3,Q8IYH0,P17844,Q2NL95,Q6NZY0,P60842,Q32Q22,Q4W5H1,O95786,Q96L91,Q7Z4W0,Q4V9L5,Q0VGL8,Q53TI6,Q9H2U1,Q7Z2V5,Q96KE7,Q7L014,P54132,Q4ZG72,Q8NAR9,Q3B797,Q9NZE6,Q9H8B9,Q2TAZ1,Q14839,Q53XJ6,Q3B7X0,O60264,Q13838,Q92499,A7E2E1,Q59E92,Q9GZR7,Q5JWW0,Q96B07,Q5CZ96,Q5HYT6,…	909	109	9079	3.57365	4.25734e-10	1.41911e-10	1.95162e-09
INTERPRO	IPR001650:DNA/RNA helicase, C-terminal	40	2.10305	2.1898e-12	P51531,Q6VMB5,Q9ULG1,A6NML1,Q59GX6,A8K6G2,O00571,P51532,Q3SWU7,Q59H21,Q59G92,Q4W5G3,Q9P172,Q05CI5,Q59FQ9,A8K8Q2,Q5ZF01,O00148,Q9NUK2,Q7Z4X3,Q8IYB8,Q8IYH0,P17844,Q2NL95,Q6NZY0,P60842,Q32Q22,Q4W5H1,O95786,Q96L91,Q7Z4W0,Q0VGL8,Q4V9L5,Q53TI6,Q9H2U1,Q7Z2V5,Q96KE7,Q7L014,P54132,Q4ZG72,Q8NAR9,Q3B797,Q9NZE6,Q9H8B9,Q2TAZ1,Q14839,Q53XJ6,Q3B7X0,O60264,Q13838,Q92499,A7E2E1,Q59E92,Q9GZR7,Q5JWW0,Q96B07,Q5CZ96,…	1804	107	16659	3.45214	5.05845e-09	1.68615e-09	3.82832e-09
UP_SEQ_FEATURE	domain:Helicase C-terminal	37	1.94532	8.26733e-12	P51531,A6NML1,Q9ULG1,Q59GX6,A8K6G2,O00571,P51532,Q3SWU7,Q59H21,Q59G92,Q4W5G3,Q05CI5,Q59FQ9,A8K8Q2,O00148,Q9NUK2,Q7Z4X3,Q8IYB8,Q8IYH0,P17844,Q2NL95,P60842,Q32Q22,Q4W5H1,O95786,Q96L91,Q7Z4W0,Q4V9L5,Q0VGL8,Q53TI6,Q9H2U1,Q7Z2V5,Q96KE7,Q7L014,P54132,Q4ZG72,Q8NAR9,Q3B797,Q9NZE6,Q2TAZ1,Q14839,Q53XJ6,Q3B7X0,O60264,Q13838,Q92499,A7E2E1,Q59E92,Q9GZR7,Q5JWW0,Q96B07,Q5HYT6,Q12873,Q14240,Q59GT8,Q92620,Q08211,…	1886	105	19113	3.57108	3.51199e-08	5.01712e-09	1.54633e-08
GOTERM_MF_FAT	GO:0004386~helicase activity	49	2.57624	9.4944e-12	P51531,Q9ULG1,A6NML1,Q6VMB5,Q59GX6,A8K6G2,P13984,O00571,Q5W0H3,Q3SWU7,P51532,Q59H21,Q59G92,Q9P172,Q4W5G3,Q53T09,Q13283,Q05CI5,Q59FQ9,Q4ZG57,A8K8Q2,Q5ZF01,O00148,Q9NUK2,Q7Z4X3,Q6IC76,Q8IYB8,Q8IYH0,P17844,Q2NL95,Q6NZY0,Q32Q22,P60842,O95786,Q4W5H1,Q96L91,Q7Z4W0,Q4V9L5,Q0VGL8,Q53TI6,Q9H2U1,Q7Z2V5,Q96KE7,P12956,Q7L014,Q32P45,P54132,Q4ZG72,Q53T61,Q8NAR9,Q5JR04,Q0Z7V0,Q6ZP53,Q3B797,Q6FI03,Q9NZE6,Q6FG89,…	1596	140	12983	2.84715	1.19914e-08	7.49465e-10	1.5447e-08
INTERPRO	IPR014021:Helicase, superfamily 1 and 2, ATP-binding	39	2.05047	1.04774e-11	P51531,Q6VMB5,Q9ULG1,A6NML1,Q59GX6,A8K6G2,O00571,P51532,Q3SWU7,Q59H21,Q59G92,Q4W5G3,Q9P172,Q05CI5,Q59FQ9,A8K8Q2,Q5ZF01,O00148,Q9NUK2,Q7Z4X3,Q8IYH0,P17844,Q2NL95,Q6NZY0,P60842,Q32Q22,Q4W5H1,O95786,Q96L91,Q7Z4W0,Q4V9L5,Q0VGL8,Q53TI6,Q9H2U1,Q7Z2V5,Q96KE7,Q7L014,P54132,Q4ZG72,Q8NAR9,Q3B797,Q9NZE6,Q9H8B9,Q2TAZ1,Q14839,Q53XJ6,Q3B7X0,O60264,Q13838,Q92499,A7E2E1,Q59E92,Q9GZR7,Q5JWW0,Q96B07,Q5CZ96,Q5HYT6,…	1804	107	16659	3.36584	2.42028e-08	6.0507e-09	1.8317e-08
INTERPRO	IPR014001:DEAD-like helicase, N-terminal	39	2.05047	1.99584e-11	P51531,Q6VMB5,Q9ULG1,A6NML1,Q59GX6,A8K6G2,O00571,P51532,Q3SWU7,Q59H21,Q59G92,Q4W5G3,Q9P172,Q05CI5,Q59FQ9,A8K8Q2,Q5ZF01,O00148,Q9NUK2,Q7Z4X3,Q8IYH0,P17844,Q2NL95,Q6NZY0,P60842,Q32Q22,Q4W5H1,O95786,Q96L91,Q7Z4W0,Q4V9L5,Q0VGL8,Q53TI6,Q9H2U1,Q7Z2V5,Q96KE7,Q7L014,P54132,Q4ZG72,Q8NAR9,Q3B797,Q9NZE6,Q9H8B9,Q2TAZ1,Q14839,Q53XJ6,Q3B7X0,O60264,Q13838,Q92499,A7E2E1,Q59E92,Q9GZR7,Q5JWW0,Q96B07,Q5CZ96,Q5HYT6,…	1804	109	16659	3.30408	4.61041e-08	9.22082e-09	3.48923e-08
INTERPRO	IPR011545:DNA/RNA helicase, DEAD/DEAH box type, N-terminal	28	1.47213	2.80686e-11	A6NML1,Q6VMB5,Q59GX6,A8K6G2,O00571,Q3SWU7,Q59H21,Q59G92,Q9P172,Q05CI5,Q59FQ9,A8K8Q2,Q5ZF01,O00148,Q7Z4X3,Q8IYH0,P17844,Q2NL95,Q6NZY0,Q32Q22,P60842,O95786,Q7Z4W0,Q4V9L5,Q0VGL8,Q53TI6,Q9H2U1,Q7Z2V5,Q96KE7,Q7L014,P54132,Q4ZG72,Q3B797,Q9NZE6,Q9H8B9,Q53XJ6,Q3B7X0,Q13838,Q92499,Q59E92,Q9GZR7,Q5JWW0,Q96B07,Q5CZ96,Q5HYT6,Q14240,Q59GT8,Q08211,Q58F26,Q5STA2,Q5STA0,Q8NI92,Q8N5M0,Q4G1A0,Q9H0U0,Q9P054,Q6PJK6,…	1804	61	16659	4.23878	6.48386e-08	9.26266e-09	4.90709e-08
UP_SEQ_FEATURE	domain:Helicase ATP-binding	37	1.94532	3.83403e-11	P51531,A6NML1,Q9ULG1,Q59GX6,A8K6G2,O00571,P51532,Q3SWU7,Q59H21,Q59G92,Q4W5G3,Q05CI5,Q59FQ9,A8K8Q2,O00148,Q9NUK2,Q7Z4X3,Q8IYB8,Q8IYH0,P17844,Q2NL95,P60842,Q32Q22,Q4W5H1,O95786,Q96L91,Q7Z4W0,Q4V9L5,Q0VGL8,Q53TI6,Q9H2U1,Q7Z2V5,Q96KE7,Q7L014,P54132,Q4ZG72,Q8NAR9,Q3B797,Q9NZE6,Q2TAZ1,Q14839,Q53XJ6,Q3B7X0,O60264,Q13838,Q92499,A7E2E1,Q59E92,Q9GZR7,Q5JWW0,Q96B07,Q5HYT6,Q12873,Q14240,Q59GT8,Q92620,Q08211,…	1886	110	19113	3.40876	1.6287e-07	2.03587e-08	7.17118e-08
GOTERM_MF_FAT	GO:0070035~purine NTP-dependent helicase activity	36	1.89274	1.756e-09	Q6VMB5,A6NML1,Q59GX6,A8K6G2,P13984,O00571,Q5W0H3,Q3SWU7,Q59H21,Q59G92,Q9P172,Q53T09,Q05CI5,Q59FQ9,Q13283,A8K8Q2,Q5ZF01,O00148,Q7Z4X3,Q6IC76,Q8IYH0,P17844,Q2NL95,Q6NZY0,P60842,Q32Q22,O95786,Q7Z4W0,Q0VGL8,Q4V9L5,Q53TI6,Q9H2U1,Q7Z2V5,Q96KE7,P12956,Q7L014,Q32P45,P54132,Q4ZG72,Q0Z7V0,Q6ZP53,Q3B797,Q6FI03,Q9NZE6,Q6FG89,Q9H8B9,Q2TAZ1,Q14839,Q53XJ6,Q3B7X0,Q13838,Q92499,Q59E92,Q9GZR7,Q5JWW0,Q96B07,Q5CZ96,…	1596	98	12983	2.98826	2.21783e-06	1.05611e-07	2.85695e-06
GOTERM_MF_FAT	GO:0008026~ATP-dependent helicase activity	36	1.89274	1.756e-09	Q6VMB5,A6NML1,Q59GX6,A8K6G2,P13984,O00571,Q5W0H3,Q3SWU7,Q59H21,Q59G92,Q9P172,Q53T09,Q05CI5,Q59FQ9,Q13283,A8K8Q2,Q5ZF01,O00148,Q7Z4X3,Q6IC76,Q8IYH0,P17844,Q2NL95,Q6NZY0,P60842,Q32Q22,O95786,Q7Z4W0,Q0VGL8,Q4V9L5,Q53TI6,Q9H2U1,Q7Z2V5,Q96KE7,P12956,Q7L014,Q32P45,P54132,Q4ZG72,Q0Z7V0,Q6ZP53,Q3B797,Q6FI03,Q9NZE6,Q6FG89,Q9H8B9,Q2TAZ1,Q14839,Q53XJ6,Q3B7X0,Q13838,Q92499,Q59E92,Q9GZR7,Q5JWW0,Q96B07,Q5CZ96,…	1596	98	12983	2.98826	2.21783e-06	1.05611e-07	2.85695e-06
INTERPRO	IPR014014:RNA helicase, DEAD-box type, Q motif	19	0.998948	8.92549e-09	Q5HYT6,A6NML1,Q59GX6,O00571,Q14240,Q59GT8,Q3SWU7,Q59H21,Q59G92,Q5STA2,Q59FQ9,A8K8Q2,Q5STA0,O00148,Q7Z4X3,Q8NI92,Q8N5M0,Q8IYH0,Q9H0U0,P17844,Q2NL95,Q9P054,P60842,Q6IBQ2,Q8NHQ9,Q9NVP1,Q7Z4W0,Q5S4N1,Q4V9L5,Q0VGL8,Q53TI6,Q7Z2V5,Q53G16,Q96KE7,Q59FR7,Q9NZR9,Q86XP3,Q7L014,Q9NQI0,Q4ZG72,Q9Y2R4,Q92841,Q59F66,Q59F68,Q69YT6,Q8N254,P38919,Q5HYU0,Q9NR30,Q59FS7,A3RJH1,Q9NZE6,Q7KYK3,Q86WD0,Q9UMR2,Q53XJ6,Q13838,…	1804	37	16659	4.74203	2.06177e-05	1.21282e-06	1.56039e-05
GOTERM_MF_FAT	GO:0042623~ATPase activity, coupled	68	3.57518	1.17179e-08	Q6VMB5,O75351,A8K6G2,P13984,Q9UE82,Q3SWU7,Q59H21,P11142,Q09028,Q05CI5,Q59FQ9,A8K8Q2,Q7Z4X3,Q96BE0,A6NN54,Q8TAS0,Q8IYH0,Q32Q22,O95786,Q7Z4W0,Q4V9L5,Q6P1Q8,Q53TI6,Q7Z2V5,Q96KE7,Q4ZG72,Q60FE2,Q0Z7V0,Q6ZP53,Q6FI03,A8K6E7,Q53HK8,Q6FG89,Q14839,Q53XJ6,Q53GZ6,Q13838,Q7Z759,P06576,A7E2E1,Q86XU5,Q6ZNL4,Q96B07,Q5CZ96,Q5HYT6,Q15753,Q5STA2,Q5STA0,Q8NI92,Q99529,A6NNS5,Q8N5M0,Q4G1A0,Q9H5E0,P28288,Q9P054,P56381,…	1596	272	12983	2.03368	1.47996e-05	6.43468e-07	1.90646e-05
UP_SEQ_FEATURE	short sequence motif:Q motif	18	0.946372	1.70342e-08	Q5HYT6,A6NML1,Q59GX6,O00571,Q14240,Q59GT8,Q3SWU7,Q59H21,Q59G92,Q5STA2,Q59FQ9,A8K8Q2,Q5STA0,O00148,Q7Z4X3,Q8NI92,Q8N5M0,Q8IYH0,Q9H0U0,P17844,Q2NL95,Q9P054,P60842,Q6IBQ2,Q8NHQ9,Q9NVP1,Q7Z4W0,Q5S4N1,Q4V9L5,Q0VGL8,Q53TI6,Q7Z2V5,Q53G16,Q96KE7,Q59FR7,Q9NZR9,Q86XP3,Q7L014,Q9NQI0,Q4ZG72,Q9Y2R4,Q92841,Q59F66,Q59F68,Q69YT6,Q8N254,P38919,Q5HYU0,Q9NR30,Q59FS7,Q9NZE6,Q7KYK3,Q86WD0,Q9UMR2,Q53XJ6,Q13838,Q5STU2,…	1886	37	19113	4.93013	7.23588e-05	4.82408e-06	3.18608e-05
UP_SEQ_FEATURE	short sequence motif:DEAD box	16	0.84122	1.42399e-07	A6NML1,Q59GX6,O00571,Q14240,Q59GT8,Q59H21,Q59FQ9,A8K8Q2,Q7Z4X3,Q9H0U0,Q8IYH0,P17844,Q9P054,Q2NL95,P60842,Q6IBQ2,Q8NHQ9,Q9NVP1,Q7Z4W0,Q5S4N1,Q0VGL8,Q4V9L5,Q53TI6,Q7Z2V5,Q96KE7,Q53G16,Q59FR7,Q86XP3,Q9NZR9,Q7L014,Q9NQI0,Q4ZG72,Q9Y2R4,Q92841,Q59F66,Q59F68,Q8N254,P38919,Q59FS7,Q9NZE6,A3RJH1,Q86WD0,Q9UMR2,Q53XJ6,Q92499,Q59E92,Q9GZR7,Q5JWW0,Q96B07	1886	33	19113	4.91353	0.000604728	3.36056e-05	0.000266343
INTERPRO	IPR000629:RNA helicase, ATP-dependent, DEAD-box, conserved site	15	0.788644	2.05041e-06	Q7Z2V5,Q59FR7,A6NML1,Q9NZR9,Q59GX6,Q86XP3,Q7L014,Q9NQI0,O00571,Q4ZG72,Q14240,Q59GT8,Q9Y2R4,Q92841,Q3SWU7,Q59H21,Q59F66,A8K8Q2,Q59F68,Q8N254,Q7Z4X3,P38919,Q8NI92,Q9NR30,Q59FS7,A3RJH1,Q9NZE6,Q86WD0,Q8IYH0,P17844,Q53XJ6,Q9P054,P60842,Q6IBQ2,Q92499,Q8NHQ9,Q59E92,Q9NVP1,Q9GZR7,Q7Z4W0,Q5S4N1,Q5JWW0,Q96B07,Q4V9L5,Q0VGL8,Q53TI6	1804	32	16659	4.32866	0.00472526	0.000182155	0.00358456
GOTERM_MF_FAT	GO:0003724~RNA helicase activity	13	0.683491	7.85505e-05	Q5HYT6,Q59GX6,O00571,Q3SWU7,Q92620,Q59G92,Q58F26,Q08211,Q5STA2,Q13283,Q05CI5,Q5STA0,Q7Z4X3,Q8NI92,P17844,Q9P054,Q6PJK6,Q32Q22,Q5U0Q1,Q6IBQ2,O43143,Q9NVP1,Q7Z4W0,Q5S4N1,Q4V9L5,Q53TI6,Q7Z2V5,Q59FR7,Q32P45,Q4ZG72,Q92841,Q6ZP53,Q59F66,Q8N254,Q6FI03,P38919,Q5HYU0,Q9NR30,Q59FS7,A3RJH1,Q7KYK3,Q13838,Q53HH4,Q92499,Q5STU2,Q5STU3,Q5RJ65,Q5STU1,Q59E92,Q5RJ61,Q9GZR7,Q12803,Q5STB8,Q5STU9,Q5HYE9	1596	29	12983	3.64659	0.0944503	0.00210869	0.127722
GOTERM_MF_FAT	GO:0008186~RNA-dependent ATPase activity	10	0.525762	0.00069156	Q5HYT6,Q59GX6,O00571,Q3SWU7,Q92620,Q59G92,Q08211,Q58F26,Q5STA2,Q05CI5,Q13283,Q5STA0,Q7Z4X3,Q8NI92,Q9P054,Q6PJK6,Q32Q22,Q5U0Q1,Q6IBQ2,Q9NVP1,Q7Z4W0,Q5S4N1,Q4V9L5,Q53TI6,Q59FR7,Q32P45,Q4ZG72,Q92841,Q6ZP53,Q59F66,Q6FI03,Q8N254,P38919,Q5HYU0,Q9NR30,Q59FS7,Q7KYK3,Q13838,Q53HH4,Q5STU2,Q5STU3,Q5RJ65,Q5STU1,Q5RJ61,Q9GZR7,Q12803,Q5STB8,Q5STU9,Q5HYE9	1596	22	12983	3.6976	0.582613	0.0137732	1.11922
GOTERM_MF_FAT	GO:0004004~ATP-dependent RNA helicase activity	9	0.473186	0.00236367	Q5HYT6,Q59FR7,Q59GX6,Q32P45,O00571,Q4ZG72,Q3SWU7,Q59G92,Q92620,Q6ZP53,Q58F26,Q08211,Q5STA2,Q13283,Q05CI5,Q5STA0,Q8N254,Q6FI03,Q7Z4X3,P38919,Q8NI92,Q5HYU0,Q59FS7,Q9NR30,Q7KYK3,Q9P054,Q6PJK6,Q13838,Q32Q22,Q5U0Q1,Q6IBQ2,Q53HH4,Q5STU2,Q5RJ65,Q5STU3,Q5STU1,Q9NVP1,Q9GZR7,Q5RJ61,Q7Z4W0,Q5S4N1,Q12803,Q4V9L5,Q53TI6,Q5HYE9,Q5STU9,Q5STB8	1596	21	12983	3.48631	0.949655	0.0412227	3.77698
Annotation Cluster 21	Enrichment Score: 8.998160127724796
Category	Term	Count	%	PValue	Genes	List Total	Pop Hits	Pop Total	Fold Enrichment	Bonferroni	Benjamini	FDR
GOTERM_BP_FAT	GO:0006091~generation of precursor metabolites and energy	87	4.57413	2.79663e-14	Q9NUZ0,Q8N5H5,O75964,Q5H9R2,P00167,Q5T952,Q6FHQ6,Q6IAL5,Q6P3S4,Q59F44,Q86TQ8,Q9UDG5,Q6VBB7,Q8WUW7,Q6YNQ1,Q5JPU1,Q5JPU2,Q8TAS0,Q9Y4T0,Q5JPU0,P10515,Q5VSR8,Q5VSR7,Q5JPU3,Q8NCF7,Q9UGJ0,Q6LEN1,P13073,P36871,Q53X65,P00558,Q6FI37,Q9HAN0,Q6FI31,Q9P1A0,Q15067,Q96AM7,Q6TCH8,P43155,Q6LCA3,Q01813,Q2TSD0,Q5JPT8,P04040,Q9UC85,Q5JPT9,P46926,Q0ZAI9,A6NNR3,A8MV91,Q96GV1,Q7Z3V0,Q8NAS5,P11217,Q5ZEY3,P11216,Q9NYI7,…	1611	313	13528	2.33407	1.04105e-10	3.71803e-12	5.15921e-11
GOTERM_BP_FAT	GO:0006084~acetyl-CoA metabolic process	20	1.05152	8.46437e-11	Q9NUZ0,Q75MT9,Q8N5H5,Q0QF12,P53597,P48735,Q6FHQ6,Q6IAL5,Q0QEL2,Q7Z5G3,Q96I99,Q9UIC5,Q86TQ8,P36957,A8K414,Q6LEQ7,Q13423,Q86SW4,P40925,P40926,Q9Y4T0,P10515,O43837,Q16187,Q2TB59,P11177,Q7Z503,Q6FHZ0,Q53GF8,Q71UF1,Q01991,Q6FI37,Q9HAN0,Q59FY4,Q3ZCW5,Q75MP7,Q5T9Q4,Q5T9Q5,Q9P2R7,Q5T9Q6,Q7Z5W8,Q6IBS5,Q0QF37,Q9Y436,Q7LDY7,Q0QER2,Q53EP3,Q1RMZ4,P09622,Q8IW48,Q7Z3V0,P31040,A8K5J6,Q567U4,Q86TW7,Q9H7Q4,Q6N0B1,…	1611	31	13528	5.41759	3.14959e-07	5.43033e-09	1.5607e-07
KEGG_PATHWAY	hsa00020:Citrate cycle (TCA cycle)	22	1.15668	1.16776e-10	Q9NUZ0,Q75MT9,Q0QF12,P53597,P48735,Q0QEL2,Q6FHQ6,Q6IAL5,Q9NP11,Q96I99,Q9UIC5,P53396,Q86TQ8,Q53GE3,P36957,P08559,A8K414,Q6LEQ7,P29803,Q86SW4,P11498,P40925,P40926,Q5JPU1,Q5JPU2,Q9Y4T0,Q5JPU0,P10515,O43837,Q99724,Q5JPU3,Q02218,Q99725,Q16187,Q6FHZ0,P11177,Q7Z503,Q53H41,Q71UF1,Q53GF8,Q01991,Q6FI37,Q9HAN0,Q3ZCW5,Q75MP7,Q5T9Q4,Q5T9Q5,Q5T9Q6,Q9P2R7,Q6IBS5,Q6LCA3,Q0QF37,Q9Y436,Q7LDY7,Q0QER2,Q53EP3,Q5JPT8,…	808	31	5085	4.46622	1.99686e-08	4.99216e-09	1.42605e-07
GOTERM_BP_FAT	GO:0009060~aerobic respiration	21	1.1041	1.60274e-10	Q9NUZ0,Q75MT9,Q8N5H5,Q0QF12,P53597,P48735,A8K6C0,Q8TBJ0,Q6FHQ6,Q6IAL5,Q0QEL2,Q96I99,Q9UIC5,Q86TQ8,P36957,A8K414,Q6LEQ7,Q13423,Q86SW4,P40925,P40926,Q9Y4T0,O43837,Q16187,Q2TB59,Q7Z503,P11177,Q6FHZ0,Q53GF8,Q71UF1,Q6FI37,Q3ZCW5,Q75MP7,Q5T9Q4,Q5T9Q5,Q8TAK2,Q9P2R7,Q5T9Q6,Q6IBS5,Q6TCH8,Q0QF37,Q9Y436,Q7LDY7,Q0QER2,Q9UC85,P04040,Q7Z3V0,Q8IW48,P31040,Q8NAS5,A8K5J6,Q567U4,Q86TW7,Q6N0B1,Q13584,Q6FIA4,Q16798,…	1611	35	13528	5.03836	5.96381e-07	9.46636e-09	2.95523e-07
SP_PIR_KEYWORDS	tricarboxylic acid cycle	15	0.788644	4.59227e-10	Q9NUZ0,Q75MT9,Q0QF12,P53597,P48735,Q6FHQ6,Q6IAL5,Q0QEL2,Q9UIC5,Q96I99,Q86TQ8,P36957,A8K414,Q6LEQ7,Q86SW4,P40925,P40926,Q9Y4T0,O43837,Q02218,Q16187,Q7Z503,Q6FHZ0,Q53GF8,Q71UF1,Q6FI37,Q3ZCW5,Q75MP7,Q5T9Q4,Q5T9Q5,Q5T9Q6,Q9P2R7,Q6IBS5,Q0QF37,Q9Y436,Q7LDY7,Q0QER2,Q7Z3V0,Q8IW48,P31040,A8K5J6,Q567U4,Q86TW7,Q6N0B1,Q13584,Q6FIA4,Q59GW8,Q53GL5,O75874,P07954,P50213,Q99798,O75390	1895	21	19235	7.25028	2.9115e-07	7.10122e-09	6.83359e-07
GOTERM_BP_FAT	GO:0051187~cofactor catabolic process	19	0.998948	9.36454e-10	Q9NUZ0,Q75MT9,Q8N5H5,Q0QF12,P53597,Q68D62,P48735,P09601,Q3SY68,Q3SY69,Q6FHQ6,Q6IAL5,Q0QEL2,Q96I99,Q9UIC5,Q86TQ8,P36957,A8K414,Q6LEQ7,Q13423,Q86SW4,P40925,P40926,Q9Y4T0,O43837,Q16187,Q96DI8,Q2TB59,Q7Z503,P11177,Q6FHZ0,Q53GF8,Q71UF1,Q6FI37,Q3ZCW5,Q75MP7,Q5T9Q4,Q5T9Q5,Q8N922,Q9P2R7,Q5T9Q6,Q6IBS5,Q0QF37,Q9Y436,Q7LDY7,Q0QER2,P53004,Q7Z3V0,Q8IW48,P31040,A8K5J6,Q567U4,Q86TW7,Q6N0B1,A8K747,Q13584,Q6FIA4,…	1611	31	13528	5.14671	3.48454e-06	5.05007e-08	1.72668e-06
GOTERM_BP_FAT	GO:0006099~tricarboxylic acid cycle	16	0.84122	2.46904e-09	Q9NUZ0,Q75MT9,Q0QF12,Q8N5H5,P53597,P48735,Q6FHQ6,Q6IAL5,Q0QEL2,Q9UIC5,Q96I99,Q86TQ8,P36957,A8K414,Q6LEQ7,Q13423,Q86SW4,P40925,P40926,Q9Y4T0,O43837,Q16187,Q7Z503,P11177,Q6FHZ0,Q2TB59,Q53GF8,Q71UF1,Q6FI37,Q3ZCW5,Q75MP7,Q5T9Q4,Q5T9Q5,Q9P2R7,Q5T9Q6,Q6IBS5,Q0QF37,Q9Y436,Q7LDY7,Q0QER2,Q7Z3V0,Q8IW48,P31040,A8K5J6,Q567U4,Q86TW7,Q6N0B1,Q13584,Q6FIA4,Q59GW8,Q53GL5,O75874,P07954,P50213,Q99798,O75390	1611	23	13528	5.84158	9.18726e-06	1.24153e-07	4.55255e-06
GOTERM_BP_FAT	GO:0046356~acetyl-CoA catabolic process	16	0.84122	2.46904e-09	Q9NUZ0,Q75MT9,Q0QF12,Q8N5H5,P53597,P48735,Q6FHQ6,Q6IAL5,Q0QEL2,Q9UIC5,Q96I99,Q86TQ8,P36957,A8K414,Q6LEQ7,Q13423,Q86SW4,P40925,P40926,Q9Y4T0,O43837,Q16187,Q7Z503,P11177,Q6FHZ0,Q2TB59,Q53GF8,Q71UF1,Q6FI37,Q3ZCW5,Q75MP7,Q5T9Q4,Q5T9Q5,Q9P2R7,Q5T9Q6,Q6IBS5,Q0QF37,Q9Y436,Q7LDY7,Q0QER2,Q7Z3V0,Q8IW48,P31040,A8K5J6,Q567U4,Q86TW7,Q6N0B1,Q13584,Q6FIA4,Q59GW8,Q53GL5,O75874,P07954,P50213,Q99798,O75390	1611	23	13528	5.84158	9.18726e-06	1.24153e-07	4.55255e-06
GOTERM_BP_FAT	GO:0009109~coenzyme catabolic process	17	0.893796	2.48823e-09	Q9NUZ0,Q75MT9,Q0QF12,Q8N5H5,P53597,Q68D62,P48735,Q3SY68,Q3SY69,Q6FHQ6,Q6IAL5,Q0QEL2,Q96I99,Q9UIC5,Q86TQ8,P36957,A8K414,Q6LEQ7,Q13423,Q86SW4,P40925,P40926,Q9Y4T0,O43837,Q16187,Q7Z503,P11177,Q6FHZ0,Q2TB59,Q53GF8,Q71UF1,Q6FI37,Q3ZCW5,Q75MP7,Q5T9Q4,Q5T9Q5,Q8N922,Q9P2R7,Q5T9Q6,Q6IBS5,Q0QF37,Q9Y436,Q7LDY7,Q0QER2,Q7Z3V0,Q8IW48,P31040,A8K5J6,Q567U4,Q86TW7,Q6N0B1,Q13584,Q6FIA4,Q59GW8,Q6AI55,Q53GL5,O75874,…	1611	26	13528	5.49052	9.25865e-06	1.23449e-07	4.58793e-06
GOTERM_BP_FAT	GO:0043648~dicarboxylic acid metabolic process	18	0.946372	5.64395e-08	Q9NUZ0,Q75MT9,Q0QF12,A8K6I5,P53597,Q1KLZ6,P42229,Q8TBJ0,Q0QEL2,Q6IAL5,Q9UIC5,Q86TQ8,P36957,A8K414,Q6LEQ7,P11498,Q8N3W6,Q86SW4,P40925,P40926,Q59GY7,Q8N3W7,O43837,P48163,Q16187,Q6FHZ0,Q53GF8,Q75MP7,Q6IBS5,Q6TCH8,Q0QF37,P23368,Q7LDY7,P00505,Q546H9,P09622,Q8IW48,Q8NAS5,P31040,A8K5J6,P51692,Q86TW7,Q8WVX2,Q16798,P51649,Q59GW8,Q8WW55,Q9BWL6,P50213,P07954,Q8WWS9,O75390,Q59H39	1611	34	13528	4.44561	0.00020999	2.56111e-06	0.000104066
GOTERM_BP_FAT	GO:0045333~cellular respiration	32	1.68244	1.33584e-07	Q9NUZ0,Q75MT9,Q8N5H5,Q0QF12,P53597,Q5H9R2,P03928,Q8TBJ0,Q6IAL5,Q6FHQ6,Q53GR7,Q86TQ8,Q86SW4,Q8N3W6,Q9Y4T0,Q8N3W7,Q6LE88,O43837,Q6LEN1,Q7Z503,Q6FHZ0,Q71UF1,Q6FI37,Q8TAK2,Q9P1A0,Q96AM7,Q6IBS5,Q7Z7M7,Q7Z7M6,Q6TCH8,Q7LDY7,Q7Z7M5,Q7Z7M4,Q9UC85,P04040,P09622,Q7Z3V0,P31040,Q8NAS5,A8K5J6,Q567U4,Q6N0B1,Q86TW7,Q9UJS0,Q13584,Q6FIA4,Q16798,P51649,P14927,Q85BD0,Q6FGD1,Q8WU60,Q7GY08,P99999,P31930,Q53GL5,O75874,…	1611	97	13528	2.77023	0.000496943	5.64847e-06	0.000246309
GOTERM_BP_FAT	GO:0015980~energy derivation by oxidation of organic compounds	40	2.10305	4.82873e-07	Q9NUZ0,Q75MT9,Q8N5H5,Q0QF12,P53597,Q5H9R2,Q9UPN1,Q5T952,P03928,Q8TBJ0,Q6IAL5,Q6FHQ6,Q53GR7,Q86TQ8,Q86SW4,Q8N3W6,Q8NCK6,Q9Y4T0,Q8N3W7,Q6LE88,O43837,Q9UGJ0,Q6LEN1,Q6FHZ0,Q7Z503,Q71UF1,Q6FI37,Q8TAK2,Q9P1A0,Q96AM7,Q7Z7M7,Q6IBS5,Q7Z7M6,Q6TCH8,P43155,Q7Z7M5,Q7LDY7,Q7Z7M4,P04040,Q9UC85,P09622,A6NNR3,Q7Z3V0,P31040,Q8NAS5,A8K5J6,P11217,Q567U4,Q6N0B1,Q86TW7,P11216,Q9UJS0,Q13584,Q6FIA4,P51649,Q16798,P14927,…	1611	144	13528	2.33257	0.00179516	1.79676e-05	0.000890344
Annotation Cluster 22	Enrichment Score: 8.633968323297815
Category	Term	Count	%	PValue	Genes	List Total	Pop Hits	Pop Total	Fold Enrichment	Bonferroni	Benjamini	FDR
GOTERM_BP_FAT	GO:0031145~anaphase-promoting complex-dependent proteasomal ubiquitin-dependent protein catabolic process	32	1.68244	9.75146e-13	Q5JNW4,Q53FN2,Q05DH1,Q6MZI6,Q05CW6,P28065,Q3MIH3,Q53XP2,A8K7C4,Q5PY61,P14635,A6NJ42,Q6NW36,A6NLF6,A4D0Q1,Q6IB71,Q49A90,Q5TZP9,Q96N86,P43686,P35998,Q05BX4,Q9UFQ0,Q66K58,P62195,P20618,Q4W5I2,P62979,Q7Z474,A8K6E5,Q8WYN9,Q8WYN8,Q5JXJ1,Q2M2R1,Q5U5U6,Q8N9M2,P62987,P62988,Q3LIA5,Q4KMX6,P49721,P49720,O43242,Q6MZZ1,Q99460,Q9Y6E3,Q75L23,Q5H9N4,Q53HB3,A6NP15,A8K763,P61289,Q69YV3,Q9BZ93,Q53FT5,Q9UM13,A8K3I7,…	1611	65	13528	4.13404	3.62838e-09	1.06717e-10	1.79796e-09
GOTERM_BP_FAT	GO:0051351~positive regulation of ligase activity	34	1.78759	1.19941e-12	Q5JNW4,Q53FN2,Q05DH1,Q6MZI6,Q05CW6,P28065,Q3MIH3,Q53XP2,A8K7C4,Q5PY61,P14635,Q6NW36,A6NLF6,A4D0Q1,Q6IB71,Q49A90,Q5TZP9,Q96N86,P43686,P35998,Q05BX4,Q9UFQ0,Q66K58,Q8NFL2,P62195,P20618,Q4W5I2,P62979,Q7Z474,A8K6E5,Q8WYN9,Q8WYN8,Q5JXJ1,Q2M2R1,A8K334,Q5U5U6,P61088,Q8N9M2,P62987,P62988,Q3LIA5,Q4KMX6,P49721,P49720,O43242,Q6MZZ1,Q99460,Q9Y6E3,Q75L23,Q5H9N4,Q53HB3,A6NP15,A8K763,P61289,Q13526,Q69YV3,Q5YKL1,…	1611	73	13528	3.91106	4.46287e-09	1.23969e-10	2.21148e-09
GOTERM_BP_FAT	GO:0051443~positive regulation of ubiquitin-protein ligase activity	33	1.73502	1.80382e-12	Q5JNW4,Q53FN2,Q05DH1,Q6MZI6,Q05CW6,P28065,Q3MIH3,Q53XP2,A8K7C4,Q5PY61,P14635,Q6NW36,A6NLF6,A4D0Q1,Q6IB71,Q49A90,Q5TZP9,Q96N86,P43686,P35998,Q05BX4,Q9UFQ0,Q66K58,Q8NFL2,P62195,P20618,Q4W5I2,P62979,Q7Z474,A8K6E5,Q8WYN9,Q8WYN8,Q5JXJ1,Q2M2R1,Q5U5U6,P61088,Q8N9M2,P62987,P62988,Q3LIA5,Q4KMX6,P49721,P49720,O43242,Q6MZZ1,Q99460,Q9Y6E3,Q75L23,Q5H9N4,Q53HB3,A6NP15,A8K763,P61289,Q13526,Q69YV3,Q9BZ93,Q53FT5,…	1611	70	13528	3.95871	6.71186e-09	1.67797e-10	3.32591e-09
GOTERM_BP_FAT	GO:0031400~negative regulation of protein modification process	44	2.31335	5.56445e-12	Q59FI5,Q5JNW4,A8K7B7,Q5T3R7,Q5T3R8,Q53FN2,Q4VJB6,Q05DH1,Q6MZI6,Q05CW6,Q5VXV2,Q4VY19,Q5VXV3,Q53XZ5,Q5W0X3,Q2Q9B7,P28065,Q3MIH3,Q53XP2,Q01105,Q0PHS1,A8K9K2,Q0PHS4,Q5PY61,Q53GS0,A6NJ42,Q1JUQ5,Q6NW36,P62258,A6NLF6,Q59FP7,A4D0Q1,Q1JUQ3,P67775,Q6IB71,Q49A90,Q96N86,P35998,P43686,P26358,Q05BX4,P17252,Q2TSD3,Q66K58,Q9UFQ0,P62195,P20618,Q4W5I2,P62979,Q7Z474,Q2TNI1,Q6IAW3,Q59EQ2,A8K6E5,Q3V793,Q8WYN9,Q8WYN8,…	1611	119	13528	3.10487	2.07053e-08	4.92983e-10	1.026e-08
GOTERM_BP_FAT	GO:0051340~regulation of ligase activity	35	1.84017	7.25748e-12	Q5JNW4,Q53FN2,Q05DH1,Q6MZI6,Q05CW6,P28065,Q3MIH3,Q53XP2,A8K7C4,Q5PY61,P14635,A6NJ42,Q6NW36,A6NLF6,A4D0Q1,Q6IB71,Q49A90,Q5TZP9,Q96N86,P43686,P35998,Q05BX4,Q9UFQ0,Q66K58,Q8NFL2,P62195,P20618,Q4W5I2,P62979,Q7Z474,A8K6E5,Q8WYN9,Q8WYN8,Q5JXJ1,Q2M2R1,A8K334,Q5U5U6,P61088,Q8N9M2,P62987,P62988,Q3LIA5,Q4KMX6,P49721,P49720,O43242,Q6MZZ1,Q99460,Q9Y6E3,Q75L23,Q5H9N4,Q53HB3,A6NP15,A8K763,P61289,Q69YV3,Q13526,…	1611	81	13528	3.62845	2.70053e-08	6.13756e-10	1.33818e-08
GOTERM_BP_FAT	GO:0051438~regulation of ubiquitin-protein ligase activity	34	1.78759	1.13701e-11	Q5JNW4,Q53FN2,Q05DH1,Q6MZI6,Q05CW6,P28065,Q3MIH3,Q53XP2,A8K7C4,Q5PY61,P14635,A6NJ42,Q6NW36,A6NLF6,A4D0Q1,Q6IB71,Q49A90,Q5TZP9,Q96N86,P43686,P35998,Q05BX4,Q9UFQ0,Q66K58,Q8NFL2,P62195,P20618,Q4W5I2,P62979,Q7Z474,A8K6E5,Q8WYN9,Q8WYN8,Q5JXJ1,Q2M2R1,Q5U5U6,P61088,Q8N9M2,P62987,P62988,Q3LIA5,Q4KMX6,P49721,P49720,O43242,Q6MZZ1,Q99460,Q9Y6E3,Q75L23,Q5H9N4,Q53HB3,A6NP15,A8K763,P61289,Q13526,Q69YV3,Q9BZ93,…	1611	78	13528	3.66035	4.23082e-08	9.40183e-10	2.09649e-08
GOTERM_BP_FAT	GO:0051439~regulation of ubiquitin-protein ligase activity during mitotic cell cycle	32	1.68244	1.77164e-11	Q5JNW4,Q53FN2,Q05DH1,Q6MZI6,Q05CW6,P28065,Q3MIH3,Q53XP2,A8K7C4,Q5PY61,P14635,A6NJ42,Q6NW36,A6NLF6,A4D0Q1,Q6IB71,Q49A90,Q5TZP9,Q96N86,P43686,P35998,Q05BX4,Q9UFQ0,Q66K58,P62195,P20618,Q4W5I2,P62979,Q7Z474,A8K6E5,Q8WYN9,Q8WYN8,Q5JXJ1,Q2M2R1,Q5U5U6,Q8N9M2,P62987,P62988,Q3LIA5,Q4KMX6,P49721,P49720,O43242,Q6MZZ1,Q99460,Q9Y6E3,Q75L23,Q5H9N4,Q53HB3,A6NP15,A8K763,P61289,Q69YV3,Q9BZ93,Q53FT5,Q9UM13,A8K3I7,…	1611	71	13528	3.78468	6.59227e-08	1.37339e-09	3.26664e-08
GOTERM_BP_FAT	GO:0051248~negative regulation of protein metabolic process	57	2.99685	2.42576e-11	Q59FI5,Q8NF52,Q8WVW9,Q5JNW4,A8K7B7,Q5T3R7,Q53FN2,Q5T3R8,Q4VJB6,Q05DH1,Q59GA5,Q6MZI6,Q86TQ3,Q05CW6,Q5VXV2,Q6FG33,Q5VXV3,Q4VY19,Q9Y2T7,Q53XZ5,Q5HY53,Q5W0X3,Q2Q9B7,P28065,Q3MIH3,Q5HY55,Q5HY54,Q53XP2,Q01105,Q0PHS1,A8K9K2,Q0PHS4,Q8WTW0,Q5PY61,Q53GS0,A6NJ42,P08238,Q1JUQ5,Q6NW36,P62258,Q59FP7,A6NLF6,A4D0Q1,Q1JUQ3,P67775,Q04206,Q6IB71,Q16594,Q49A90,Q96N86,P35998,P43686,P26358,A6NLY9,Q05BX4,P17252,Q2TSD3,…	1611	187	13528	2.5596	9.02625e-08	1.84209e-09	4.47275e-08
GOTERM_BP_FAT	GO:0051437~positive regulation of ubiquitin-protein ligase activity during mitotic cell cycle	31	1.62986	2.72153e-11	O43242,Q5JNW4,Q6MZZ1,Q53FN2,Q99460,Q9Y6E3,Q05DH1,Q75L23,Q6MZI6,Q53HB3,Q5H9N4,A8K763,A6NP15,Q05CW6,P61289,Q69YV3,P28065,Q9BZ93,Q3MIH3,Q53FT5,Q9UM13,Q53XP2,Q53FT8,A8K3I7,Q9BPX9,Q53XL8,Q96C32,A8K7C4,Q5PY61,Q53GN6,P14635,A8K2M0,Q6NW36,O14818,A6NLF6,A4D0Q1,Q53GF5,P51665,P60900,Q6IB71,Q5TZP9,Q49A90,P62191,P51668,Q96N86,Q53XU2,Q567Q5,Q9UJX3,P35998,P43686,P25788,P25789,P25787,Q6FHK7,Q6ICS6,Q05BX4,Q66K58,…	1611	68	13528	3.82817	1.01268e-07	2.02537e-09	5.01811e-08
GOTERM_BP_FAT	GO:0051436~negative regulation of ubiquitin-protein ligase activity during mitotic cell cycle	30	1.57729	4.15639e-11	O43242,Q5JNW4,Q6MZZ1,Q53FN2,Q99460,Q9Y6E3,Q05DH1,Q75L23,Q6MZI6,Q53HB3,A8K763,A6NP15,Q05CW6,P61289,Q69YV3,P28065,Q9BZ93,Q3MIH3,Q53FT5,Q9UM13,Q53XP2,A8K3I7,Q53FT8,Q53XL8,Q96C32,Q5PY61,Q53GN6,A8K2M0,A6NJ42,Q6NW36,O14818,A6NLF6,A4D0Q1,Q53GF5,P51665,P60900,Q6IB71,P62191,Q49A90,P51668,Q96N86,Q53XU2,Q567Q5,Q9UJX3,P35998,P43686,P25788,P25789,P25787,Q6ICS6,Q05BX4,Q6FHK7,Q66K58,Q9UFQ0,P62195,Q9UJX2,Q4W5I2,…	1611	65	13528	3.87566	1.54659e-07	3.03253e-09	7.66377e-08
GOTERM_BP_FAT	GO:0006511~ubiquitin-dependent protein catabolic process	67	3.52261	4.16347e-11	Q16531,P09936,Q8WW12,Q5JNW4,O75150,Q53FN2,Q05DH1,Q6MZI6,P61077,Q05CW6,A4D1L5,Q14139,A4D1L6,A0JNS3,A8K086,Q5T2B5,P28065,Q3MIH3,Q7Z5K8,Q5T2B7,Q8TBS8,Q53XP2,P68036,A8K7C4,P54578,Q5PY61,Q93009,Q96IW5,P40818,P14635,A6NJ42,Q53XY5,Q6NW36,A6NG77,A6NLF6,A4D0Q1,Q53GS9,Q6IB71,P62256,Q5TZP9,Q49A90,Q96N86,Q6U8A4,P35998,Q9UPT9,P43686,P62837,Q05DF5,Q05BX4,Q66K58,Q9UFQ0,O75477,A6NMY8,P62195,Q4W5I2,Q5M7Z1,P20618,…	1611	242	13528	2.32486	1.54923e-07	2.97928e-09	7.67683e-08
GOTERM_BP_FAT	GO:0032269~negative regulation of cellular protein metabolic process	55	2.89169	5.10619e-11	Q59FI5,Q8WVW9,Q5JNW4,A8K7B7,Q5T3R7,Q53FN2,Q5T3R8,Q4VJB6,Q05DH1,Q59GA5,Q6MZI6,Q05CW6,Q5VXV2,Q6FG33,Q5VXV3,Q4VY19,Q9Y2T7,Q53XZ5,Q5W0X3,Q2Q9B7,P28065,Q3MIH3,Q53XP2,Q01105,Q0PHS1,A8K9K2,Q0PHS4,Q8WTW0,Q5PY61,Q53GS0,A6NJ42,P08238,Q1JUQ5,Q6NW36,P62258,Q59FP7,A6NLF6,A4D0Q1,Q1JUQ3,P67775,Q6IB71,Q16594,Q49A90,Q96N86,P35998,P43686,P26358,A6NLY9,Q05BX4,P17252,Q2TSD3,Q66K58,Q9UFQ0,Q659G3,P62195,Q4W5I2,P20618,…	1611	180	13528	2.56583	1.90001e-07	3.51855e-09	9.41508e-08
GOTERM_BP_FAT	GO:0031397~negative regulation of protein ubiquitination	32	1.68244	6.49464e-11	O43242,Q5JNW4,Q5T3R7,Q6MZZ1,Q5T3R8,Q53FN2,Q99460,Q9Y6E3,Q9BZE4,Q05DH1,A1XKG3,Q75L23,Q6MZI6,Q53HB3,A8K763,A6NP15,Q05CW6,P61289,Q69YV3,Q00535,P28065,Q9BZ93,Q3MIH3,Q53FT5,Q9UM13,Q53XP2,A8K3I7,Q53FT8,Q53XL8,Q96C32,Q5PY61,Q53GN6,Q53GS0,A8K2M0,A6NJ42,Q6NW36,O14818,A6NLF6,A4D0Q1,Q53GF5,P51665,P60900,Q6IB71,P62191,Q49A90,P51668,Q96N86,Q53XU2,Q567Q5,Q9UJX3,P35998,P43686,P25788,P25789,P25787,Q6ICS6,Q05BX4,…	1611	74	13528	3.63125	2.41665e-07	4.31546e-09	1.19752e-07
GOTERM_BP_FAT	GO:0051444~negative regulation of ubiquitin-protein ligase activity	30	1.57729	1.02888e-10	O43242,Q5JNW4,Q6MZZ1,Q53FN2,Q99460,Q9Y6E3,Q05DH1,Q75L23,Q6MZI6,Q53HB3,A8K763,A6NP15,Q05CW6,P61289,Q69YV3,P28065,Q9BZ93,Q3MIH3,Q53FT5,Q9UM13,Q53XP2,A8K3I7,Q53FT8,Q53XL8,Q96C32,Q5PY61,Q53GN6,A8K2M0,A6NJ42,Q6NW36,O14818,A6NLF6,A4D0Q1,Q53GF5,P51665,P60900,Q6IB71,P62191,Q49A90,P51668,Q96N86,Q53XU2,Q567Q5,Q9UJX3,P35998,P43686,P25788,P25789,P25787,Q6ICS6,Q05BX4,Q6FHK7,Q66K58,Q9UFQ0,P62195,Q9UJX2,Q4W5I2,…	1611	67	13528	3.75997	3.82847e-07	6.48893e-09	1.89711e-07
GOTERM_BP_FAT	GO:0051352~negative regulation of ligase activity	30	1.57729	1.02888e-10	O43242,Q5JNW4,Q6MZZ1,Q53FN2,Q99460,Q9Y6E3,Q05DH1,Q75L23,Q6MZI6,Q53HB3,A8K763,A6NP15,Q05CW6,P61289,Q69YV3,P28065,Q9BZ93,Q3MIH3,Q53FT5,Q9UM13,Q53XP2,A8K3I7,Q53FT8,Q53XL8,Q96C32,Q5PY61,Q53GN6,A8K2M0,A6NJ42,Q6NW36,O14818,A6NLF6,A4D0Q1,Q53GF5,P51665,P60900,Q6IB71,P62191,Q49A90,P51668,Q96N86,Q53XU2,Q567Q5,Q9UJX3,P35998,P43686,P25788,P25789,P25787,Q6ICS6,Q05BX4,Q6FHK7,Q66K58,Q9UFQ0,P62195,Q9UJX2,Q4W5I2,…	1611	67	13528	3.75997	3.82847e-07	6.48893e-09	1.89711e-07
SP_PIR_KEYWORDS	proteasome	25	1.31441	1.14824e-10	O43242,Q5JNW4,Q6MZZ1,Q99460,Q9Y6E3,Q05DH1,Q75L23,Q6MZI6,Q53HB3,Q05CW6,A6NP15,A8K763,P61289,P28065,Q9BZ93,Q7Z5K8,Q53FT5,Q53XP2,A8K3I7,Q53FT8,Q53XL8,Q53GN6,P54727,A8K2M0,Q16186,O14818,Q6NW36,A4D0Q1,Q53GF5,P51665,P60900,Q6IB71,P62191,Q96N86,Q53XU2,Q567Q5,P43686,P35998,P25788,P25789,Q53F10,P25787,Q05BX4,Q6ICS6,Q6FHK7,Q5LJA3,Q9Y5K5,P62195,P20618,Q7Z474,Q59GS3,Q5W0S5,Q5W0S4,Q5LJB2,Q68E00,Q5JXJ1,Q8N9M2,…	1895	56	19235	4.53143	7.27984e-08	2.02218e-09	1.70865e-07
GOTERM_BP_FAT	GO:0031398~positive regulation of protein ubiquitination	34	1.78759	1.24903e-10	Q5JNW4,Q53FN2,Q05DH1,Q6MZI6,Q05CW6,Q5W0X3,P28065,Q3MIH3,Q53XP2,A8K7C4,Q5PY61,P14635,Q6NW36,Q1JUQ5,A6NLF6,Q1JUQ3,A4D0Q1,Q6IB71,Q49A90,Q5TZP9,Q96N86,P43686,P35998,Q05BX4,Q66K58,Q9UFQ0,Q8NFL2,P62195,P20618,Q4W5I2,P62979,Q7Z474,A8K6E5,Q3V793,Q8WYN9,Q8WYN8,Q5JXJ1,Q2M2R1,Q5U5U6,P61088,Q8N9M2,P62987,P62988,Q3LIA5,Q4KMX6,Q0VDC5,P49721,P49720,O43242,Q6MZZ1,Q99460,Q9UH88,Q9Y6E3,Q75L23,Q5H9N4,Q53HB3,A6NP15,…	1611	84	13528	3.39889	4.64763e-07	7.61907e-09	2.30303e-07
GOTERM_BP_FAT	GO:0031396~regulation of protein ubiquitination	37	1.94532	3.32434e-10	Q5JNW4,Q5T3R7,Q53FN2,Q5T3R8,Q05DH1,Q6MZI6,Q05CW6,Q5W0X3,P28065,Q3MIH3,Q53XP2,A8K7C4,Q5PY61,Q53GS0,P14635,A6NJ42,Q6NW36,Q1JUQ5,A6NLF6,Q1JUQ3,A4D0Q1,Q6IB71,Q49A90,Q5TZP9,Q96N86,P43686,P35998,Q05BX4,Q66K58,Q9UFQ0,Q8NFL2,P62195,P20618,Q4W5I2,P62979,Q7Z474,Q6IAW3,A8K6E5,Q3V793,Q8WYN9,Q8WYN8,Q5JXJ1,Q2M2R1,P61088,Q5U5U6,Q8N9M2,P62987,P62988,Q3LIA5,Q4KMX6,Q0VDC5,P49721,P49720,O43242,Q6MZZ1,Q99460,Q9Y6E3,…	1611	100	13528	3.10699	1.23698e-06	1.87422e-08	6.12959e-07
GOTERM_CC_FAT	GO:0000502~proteasome complex	27	1.41956	4.08731e-10	O43242,Q5JNW4,Q6MZZ1,Q99460,Q9Y6E3,Q96C20,Q05DH1,Q59GA5,Q75L23,Q6MZI6,Q53HB3,A6NP15,Q05CW6,A8K763,P61289,P28065,Q9BZ93,Q7Z5K8,Q53FT5,Q53XP2,A8K3I7,Q53FT8,Q53XL8,Q53GN6,P14735,P54727,A8K2M0,Q16186,O14818,Q6NW36,A4D0Q1,Q53GF5,P51665,P60900,Q6IB71,P62191,P04792,Q96EI7,Q96N86,Q53XU2,Q567Q5,P35998,P43686,P25788,P25789,Q53F10,P25787,Q6ICS6,Q05BX4,Q6FHK7,Q5LJA3,Q9Y5K5,P62195,P20618,Q7Z474,Q59GS3,Q9UC35,…	1438	61	12782	3.93436	2.67719e-07	6.37426e-09	6.10908e-07
GOTERM_BP_FAT	GO:0010498~proteasomal protein catabolic process	37	1.94532	6.27842e-10	Q8WW12,Q5JNW4,Q53FN2,Q05DH1,Q6MZI6,Q05CW6,P28065,Q3MIH3,Q7Z5K8,Q53XP2,A8K7C4,Q5PY61,P14635,A6NJ42,Q6NW36,A6NLF6,A4D0Q1,Q6IB71,Q49A90,Q5TZP9,Q96N86,P43686,P35998,Q05BX4,O75477,Q9UFQ0,Q66K58,P62195,Q5M7Z1,P20618,Q4W5I2,P62979,Q7Z474,A8K6E5,Q8WYN9,Q8WYN8,Q5JXJ1,Q2M2R1,Q5U5U6,Q8N9M2,P62987,P62988,Q3LIA5,Q4KMX6,P49721,P49720,O43242,Q6MZZ1,Q99460,Q9Y6E3,Q75L23,Q5H9N4,Q53HB3,A6NP15,A8K763,P61289,Q69YV3,…	1611	102	13528	3.04607	2.3362e-06	3.43559e-08	1.15765e-06
GOTERM_BP_FAT	GO:0043161~proteasomal ubiquitin-dependent protein catabolic process	37	1.94532	6.27842e-10	Q8WW12,Q5JNW4,Q53FN2,Q05DH1,Q6MZI6,Q05CW6,P28065,Q3MIH3,Q7Z5K8,Q53XP2,A8K7C4,Q5PY61,P14635,A6NJ42,Q6NW36,A6NLF6,A4D0Q1,Q6IB71,Q49A90,Q5TZP9,Q96N86,P43686,P35998,Q05BX4,O75477,Q9UFQ0,Q66K58,P62195,Q5M7Z1,P20618,Q4W5I2,P62979,Q7Z474,A8K6E5,Q8WYN9,Q8WYN8,Q5JXJ1,Q2M2R1,Q5U5U6,Q8N9M2,P62987,P62988,Q3LIA5,Q4KMX6,P49721,P49720,O43242,Q6MZZ1,Q99460,Q9Y6E3,Q75L23,Q5H9N4,Q53HB3,A6NP15,A8K763,P61289,Q69YV3,…	1611	102	13528	3.04607	2.3362e-06	3.43559e-08	1.15765e-06
GOTERM_BP_FAT	GO:0032268~regulation of cellular protein metabolic process	103	5.41535	1.09061e-09	Q8WVW9,Q5JNW4,Q5T3R7,Q5T3R8,Q4VJB6,Q59GA5,Q5VXV2,Q5VXV3,Q53XZ5,Q2Q9B7,P28065,Q9UJU6,Q96SB3,Q01105,Q0PHS1,Q04637,Q0PHS4,Q8WTW0,Q53SI8,Q9UGJ0,P14635,A6NJ42,Q1JUQ5,Q6NW36,P62258,P14317,Q59FP7,Q1JUQ3,P67775,O60315,Q5TZP9,Q49A90,Q16594,Q8TD98,P35998,P43686,P26358,P17252,Q2TSD3,Q05BX4,Q5SWC3,Q659G3,Q4W5I2,P62979,Q53Y93,Q7Z474,O60739,Q60F95,Q53F41,Q60F94,Q59EQ2,Q96B17,A8K6E5,Q3V793,Q4LE76,Q6FG85,P61088,…	1611	474	13528	1.82472	4.05814e-06	5.7157e-08	2.01092e-06
SP_PIR_KEYWORDS	protein degradation	13	0.683491	2.09245e-08	Q567Q5,P25788,P25789,P25787,Q6ICS6,Q66K58,Q9UFQ0,Q6MZI6,P20618,P62979,A6NP15,Q7Z474,Q5RKT7,Q96H31,Q9BZ93,Q3MIH3,Q53FT5,Q8WYN9,Q53XP2,Q53FT8,A8K3I7,Q8WYN8,Q96C32,Q5U5U6,Q16740,Q5PY61,Q59EM9,P62987,P62988,Q96MH4,Q5UGI3,Q53GF5,P51665,P60900,Q6IB71,O00231,Q49A90,O00232	1895	19	19235	6.94501	1.3266e-05	2.65323e-07	3.1137e-05
GOTERM_BP_FAT	GO:0031399~regulation of protein modification process	64	3.36488	2.27369e-06	Q5JNW4,Q5T3R7,Q5T3R8,Q4VJB6,Q5VXV2,Q5VXV3,Q53XZ5,Q2Q9B7,P28065,Q9UJU6,Q96SB3,Q01105,Q0PHS1,Q0PHS4,Q9UGJ0,P14635,A6NJ42,P62258,Q6NW36,Q1JUQ5,P14317,Q59FP7,P67775,Q1JUQ3,O60315,Q49A90,Q5TZP9,Q8TD98,P43686,P35998,P26358,Q2TSD3,P17252,Q05BX4,Q4W5I2,P62979,Q53Y93,Q7Z474,Q60F95,Q60F94,Q59EQ2,Q96B17,A8K6E5,Q3V793,Q4LE76,P61088,P62987,P62988,Q0VDC5,Q5T948,Q5T949,O43242,Q504U4,Q6I9T8,Q6MZZ1,P30153,Q9Y6E3,…	1611	295	13528	1.82178	0.00842471	7.4868e-05	0.00419226
GOTERM_BP_FAT	GO:0031401~positive regulation of protein modification process	46	2.41851	2.42278e-06	Q59FI5,Q5JNW4,Q53FN2,Q05DH1,Q6MZI6,Q05CW6,Q5W0X3,P28065,Q3MIH3,Q53XP2,Q8NCK6,A8K7C4,Q8N2W9,Q5PY61,Q9UGJ0,P14635,Q6NW36,Q1JUQ5,A6NLF6,Q59FP7,P14317,A4D0Q1,Q1JUQ3,Q6IB71,Q49A90,Q5TZP9,Q96N86,P35998,P43686,P26358,Q96N67,Q05BX4,P17252,Q2TSD3,Q66K58,Q9UFQ0,Q8NFL2,P62195,P20618,Q4W5I2,P62979,Q53Y93,Q7Z474,Q53H55,P42345,Q2TNI1,A8K6E5,Q3V793,Q4LE76,Q8WYN9,Q8WYN8,Q5JXJ1,Q2M2R1,P61088,Q5U5U6,Q8N9M2,P62987,…	1611	187	13528	2.06564	0.00897467	7.83898e-05	0.00446716
GOTERM_BP_FAT	GO:0044092~negative regulation of molecular function	70	3.68034	2.6329e-06	Q8NF52,Q5JNW4,Q5T3R7,Q5T3R8,Q86TQ3,Q5HY53,Q2XSC7,P28065,P23396,Q5HY55,Q6FI20,Q5HY54,A6NJ44,Q9UGJ0,A6NJ42,Q6NW36,Q1JUQ5,P67775,Q1JUQ3,Q49A90,P43686,P35998,Q19RW5,Q05BX4,P17252,Q2TSD3,Q60FE6,P04040,Q9UC85,A8K5E3,Q60FE5,Q4W5I2,P62979,Q6NXF2,Q7Z474,Q13098,P11021,O75381,Q8TES4,A8K6E5,Q3V793,Q9Y2M4,P20810,P62987,P62988,Q96T23,Q96C61,Q0VDC5,Q5T948,Q5T949,Q86WG4,O43242,Q6I9T8,Q2XN98,P31947,Q6MZZ1,P30153,…	1611	334	13528	1.75991	0.0097492	8.30222e-05	0.00485457
KEGG_PATHWAY	hsa03050:Proteasome	21	1.1041	1.10538e-05	O43242,Q5JNW4,Q6MZZ1,Q99460,Q9Y6E3,Q05DH1,Q6MZI6,Q75L23,Q53HB3,A8K763,A6NP15,Q05CW6,P61289,P28065,Q9BZ93,Q53FT5,Q53XP2,Q53FT8,A8K3I7,Q53XL8,Q53GN6,A8K2M0,O14818,Q6NW36,A4D0Q1,Q53GF5,P51665,P60900,Q6IB71,P62191,Q96N86,Q567Q5,Q53XU2,P43686,P35998,P25788,P25789,P25787,Q6FHK7,Q6ICS6,Q05BX4,P62195,P20618,Q7Z474,Q5JXJ1,Q8N9M2,Q6IBN0,A8K9A3,Q59FJ0,Q3LIA5,Q9UNM7,Q9UNM6,P62333,P49721,O00231,P49720,O00232	808	47	5085	2.81191	0.00188842	0.000189003	0.013498
GOTERM_BP_FAT	GO:0032270~positive regulation of cellular protein metabolic process	51	2.68139	2.14417e-05	Q59FI5,Q5JNW4,Q53FN2,Q05DH1,Q6MZI6,Q05CW6,Q5W0X3,P28065,Q3MIH3,Q53HV1,Q53XP2,Q8NCK6,A8K7C4,Q8N2W9,Q5PY61,Q9UGJ0,P14635,Q1JUQ5,Q6NW36,P14317,Q59FP7,A6NLF6,A4D0Q1,Q1JUQ3,Q6IB71,Q49A90,Q5TZP9,P63241,Q96N86,P35998,P43686,P26358,Q2TSD3,P17252,Q05BX4,Q96N67,Q66K58,Q9UFQ0,Q8NFL2,P62195,Q4W5I2,P20618,P62979,Q53Y93,Q7Z474,Q53H55,Q2TNI1,P42345,A8K6E5,P62701,Q3V793,Q4LE76,Q8WYN9,Q8WYN8,Q5JXJ1,Q2M2R1,P61088,…	1611	233	13528	1.83803	0.0766855	0.000553912	0.039528
GOTERM_BP_FAT	GO:0043086~negative regulation of catalytic activity	58	3.04942	2.16514e-05	Q8NF52,Q5JNW4,Q86TQ3,Q5HY53,Q2XSC7,P28065,Q5HY55,Q6FI20,Q5HY54,A6NJ44,Q9UGJ0,A6NJ42,Q6NW36,Q1JUQ5,P67775,Q1JUQ3,Q49A90,P43686,P35998,Q19RW5,Q05BX4,P17252,Q2TSD3,Q60FE6,A8K5E3,Q60FE5,Q4W5I2,P62979,Q6NXF2,Q7Z474,Q13098,P11021,Q8TES4,A8K6E5,Q3V793,Q9Y2M4,P20810,P62987,P62988,Q96C61,Q0VDC5,Q5T948,Q5T949,Q86WG4,O43242,Q6I9T8,Q2XN98,P31947,Q6MZZ1,P30153,O94992,Q9Y6E3,Q69YV3,Q53FT5,Q9UM13,Q53FT8,Q53XL8,…	1611	277	13528	1.75827	0.0774059	0.000555472	0.0399146
GOTERM_BP_FAT	GO:0051247~positive regulation of protein metabolic process	51	2.68139	6.79013e-05	Q59FI5,Q5JNW4,Q53FN2,Q05DH1,Q6MZI6,Q05CW6,Q5W0X3,P28065,Q3MIH3,Q53HV1,Q53XP2,Q8NCK6,A8K7C4,Q8N2W9,Q5PY61,Q9UGJ0,P14635,Q1JUQ5,Q6NW36,P14317,Q59FP7,A6NLF6,A4D0Q1,Q1JUQ3,Q6IB71,Q49A90,Q5TZP9,P63241,Q96N86,P35998,P43686,P26358,Q2TSD3,P17252,Q05BX4,Q96N67,Q66K58,Q9UFQ0,Q8NFL2,P62195,Q4W5I2,P20618,P62979,Q53Y93,Q7Z474,Q53H55,Q2TNI1,P42345,A8K6E5,P62701,Q3V793,Q4LE76,Q8WYN9,Q8WYN8,Q5JXJ1,Q2M2R1,P61088,…	1611	243	13528	1.76239	0.223275	0.00153948	0.125126
GOTERM_BP_FAT	GO:0044093~positive regulation of molecular function	96	5.04732	0.000941888	Q5JNW4,Q3SWU9,Q32Q12,Q59F45,Q2XSC7,Q6VBB7,P28065,P23396,P22694,Q96GF2,Q6FI20,Q9UJU6,Q0IIN7,Q86VS1,Q9UGJ0,P14635,P09493,Q04837,Q1JUQ5,Q9UQL6,Q6NW36,Q1JUQ3,Q8TCG4,Q04206,O60315,Q6NR85,Q49A90,Q5TZP9,Q5T2U1,P35998,P43686,P06239,A8K4R4,Q19RW5,Q05BX4,Q6FGK3,P41223,P04040,Q9UC85,Q0ZAI9,Q4W5I2,P62979,Q7Z474,Q60F95,Q75KN0,Q60F94,Q16344,P01106,Q0VF45,A4LAZ5,Q59EQ2,A8K6E5,Q3V793,Q8NDD7,Q9UCI1,Q9UCI2,Q9NX34,…	1611	586	13528	1.37566	0.969996	0.016959	1.72251
GOTERM_BP_FAT	GO:0043085~positive regulation of catalytic activity	81	4.25868	0.00899154	Q5JNW4,Q3SWU9,Q59F45,Q2XSC7,Q6VBB7,P28065,Q96GF2,P22694,P23396,Q6FI20,Q9UJU6,Q86VS1,Q9UGJ0,P14635,P09493,Q04837,Q6NW36,Q8TCG4,O60315,Q6NR85,Q49A90,Q5TZP9,Q5T2U1,P35998,P43686,P06239,A8K4R4,Q19RW5,Q05BX4,P41223,Q0ZAI9,Q4W5I2,P62979,Q7Z474,Q60F95,Q60F94,Q75KN0,Q16344,P01106,Q59EQ2,A8K6E5,Q8NDD7,Q9UCI1,Q9UCI2,Q9NX34,Q5T0S2,P61088,Q9BZF9,P62987,P62988,Q573B4,Q5T0R7,Q5T0R6,Q5T0R9,Q5T948,Q5T0R3,Q5T0R2,…	1611	520	13528	1.30804	1	0.110507	15.3412
Annotation Cluster 23	Enrichment Score: 8.62936189468914
Category	Term	Count	%	PValue	Genes	List Total	Pop Hits	Pop Total	Fold Enrichment	Bonferroni	Benjamini	FDR
GOTERM_BP_FAT	GO:0007049~cell cycle	175	9.20084	6.97906e-18	P07437,O75351,Q5JNW4,Q96G51,Q32Q15,Q68DE9,Q9NTJ3,Q4W4Y1,O75496,Q6NT82,Q13564,Q0EF63,Q59F45,Q59G27,Q0EF62,Q6VBB7,P28065,Q5JPE5,Q96SB3,Q9NTI5,Q8TBS8,A8K6F2,A8K0X6,P14635,A6NJ42,Q6MZP3,Q9BV73,Q9BUV3,Q6NW36,Q9UPG3,Q8NFT6,Q59GP7,Q5TZP9,Q49A90,Q59F36,Q5T2U1,Q8TD98,O75376,Q4VBY6,Q53T61,Q9UPH5,A8K5E3,Q0ZAI9,Q6IPL3,Q53QU3,Q9NXW0,P01106,A8K6E5,Q6LCB2,Q6AI02,Q8WUG4,Q13632,P83731,Q7Z757,Q99549,Q8TC62,Q6UR97,…	1611	776	13528	1.89371	2.59691e-14	1.52759e-15	1.28684e-14
SP_PIR_KEYWORDS	cell cycle	98	5.15247	3.212e-13	Q6PJY7,O75351,Q6NSH4,Q96G51,Q9NY44,Q32Q15,P43034,Q68DE9,Q05BV1,Q9NTJ3,Q4W4Y1,O75496,Q9NQW6,Q7Z2X1,Q6NT82,Q09028,Q4ZG57,A6NGM0,Q13564,Q6FGI9,Q2HIX7,Q0EF63,Q2XSC7,Q0EF62,Q05C84,Q9NTI5,Q8TBS8,Q6NSG3,A8K6H2,A8K0X6,A7E2C4,P14635,A6NJ42,Q6MZP3,Q9BV73,Q8NFT6,Q6MZP7,Q5TZP9,Q5T2U1,Q86W55,Q19RW5,Q4VBY6,Q53T61,A8K5E3,O43264,A6NNR3,Q4W5I2,Q6IPL3,Q2M5E1,Q53QU3,Q9NXW0,Q96B19,Q68DW7,A8K6E5,Q6AI02,A8MSG9,Q8WUG4,…	1895	461	19235	2.15778	2.03633e-10	7.02183e-12	4.77951e-10
GOTERM_BP_FAT	GO:0000278~mitotic cell cycle	94	4.94217	7.98248e-13	P07437,Q5JNW4,Q6NSH4,Q32Q15,Q68DE9,P43034,Q05BV1,Q9NTJ3,Q9NQW6,Q7Z2X1,Q6LC01,Q308M6,Q59G27,Q5T2B5,P28065,Q96GF2,Q5T2B7,Q53G92,Q05C84,Q9NTI5,Q6NSG3,Q59HB8,A7E2C4,Q96CE4,P14635,A6NJ42,Q6MZP3,Q6NW36,Q9BV73,Q9BUV3,Q9UPG3,Q5TZP9,Q49A90,Q96FC3,Q59F36,P35998,P43686,Q86W55,Q05BX4,Q4VBY6,Q9UPH5,A8K5E3,O43264,Q4W5I2,Q6IPL3,P62979,Q2M5E1,Q7Z474,Q53QU3,Q5SU16,Q68DW7,A8K6E5,Q6LCB2,Q6AI02,Q8WUG4,Q9BV28,Q29RF7,…	1611	370	13528	2.13336	2.97029e-09	9.00088e-11	1.47186e-09
GOTERM_BP_FAT	GO:0022402~cell cycle process	126	6.62461	1.76842e-12	P07437,Q5JNW4,Q32Q15,Q68DE9,Q9NTJ3,Q59F45,Q0EF63,Q0EF62,Q59G27,Q6VBB7,P28065,Q96SB3,Q9NTI5,A8K6F2,P14635,A6NJ42,Q6MZP3,Q9BUV3,Q6NW36,Q9BV73,Q9UPG3,Q59GP7,Q49A90,Q5TZP9,Q59F36,O75376,Q4VBY6,Q9UPH5,A8K5E3,Q0ZAI9,Q6IPL3,Q53QU3,P01106,A8K6E5,Q6LCB2,Q6AI02,Q8WUG4,Q13632,P83731,Q7Z757,Q8TC62,Q6UR97,Q6UR98,Q6ZNL4,Q86WG4,Q2XN98,Q9Y6E3,O15355,Q5H9N4,Q6MZM3,Q6MZM4,Q69YV3,Q68EN4,Q9BPW0,Q99529,P21127,Q53XL8,…	1611	565	13528	1.87267	6.58008e-09	1.6872e-10	3.2606e-09
SP_PIR_KEYWORDS	cell division	60	3.15457	1.31446e-09	Q9UHD8,O75351,Q15003,Q6NSH4,Q6FGA2,Q53FN2,Q32Q15,Q68DE9,P43034,P49916,Q05BV1,Q4W4Y1,Q9NTJ3,Q9NQW6,Q7Z2X1,Q14141,Q9UPN1,Q6NT82,Q8IX26,Q8IX27,Q9NXK5,Q8IX28,A6NGM0,Q6FGI9,P33552,Q9UQE7,Q59F49,Q05C84,Q9NTI5,Q6NSG3,Q6IQ47,A8K7C4,A8K7C6,A7E2C4,Q6PK02,Q86VX4,Q9UJM1,P14635,Q9H834,A6NJ42,Q6MZP3,Q05D74,Q8TD19,Q14683,Q6IPS5,Q05D70,Q5TZP9,Q8WYP5,Q9H2R7,Q5T2U1,P60953,Q4VBY6,Q8TDA3,Q2TA89,O43264,A6NNR3,Q4W5I2,…	1895	264	19235	2.30691	8.33365e-07	1.85192e-08	1.95599e-06
SP_PIR_KEYWORDS	mitosis	44	2.31335	4.83879e-08	Q92862,Q6NSH4,Q15003,Q1KLZ0,Q9UE89,Q6FGA2,Q32Q15,Q8WVW5,Q53FN2,Q68DE9,P43034,Q96DE1,Q05BV1,Q9NTJ3,Q9NQW6,Q562S0,Q7Z2X1,Q562R8,Q562Z7,Q562Z6,Q9UQE7,Q562Z4,Q9NTI5,Q6NSG3,A8K7C4,Q53G99,A8K7C6,Q59HB8,A7E2C4,Q86VX4,A8K7C2,Q3SYK8,P14635,A6NJ42,Q6MZP3,Q05D74,Q9UPG3,Q14683,Q8TD19,Q05D70,Q6IPS5,Q5TZP9,Q9H2R7,Q8TDA3,Q2TA89,O43264,Q4W5I2,Q2M5E1,Q53GK6,Q59EY4,Q53QU3,Q562P0,Q59GZ5,Q14980,P63279,Q68DW7,A8K6E5,…	1895	183	19235	2.44053	3.06774e-05	5.5778e-07	7.20042e-05
GOTERM_BP_FAT	GO:0000279~M phase	72	3.78549	3.45467e-07	P07437,Q6NSH4,Q32Q15,Q68DE9,P43034,Q3SWU9,Q05BV1,Q9NTJ3,Q9NQW6,Q7Z2X1,Q6LC01,Q6FGI9,Q59G27,Q53G92,Q05C84,Q9NTI5,A8K6F2,Q6NSG3,Q59HB8,A7E2C4,Q96CE4,P14635,A6NJ42,Q6MZP3,Q9BUV3,Q9UPG3,Q59GP7,Q5TZP9,Q96FC3,Q59F36,O75376,Q4VBY6,Q60FE2,A8K5E3,O43264,Q4W5I2,Q2M5E1,Q53QU3,Q5SU16,Q68DW7,A8K6E5,Q6LCB2,Q6AI02,Q8WUG4,Q9BV28,Q29RF7,Q9UNS1,P83731,P24941,Q6P712,Q7Z757,Q8TC62,Q6UR97,Q6UR98,Q86XU5,Q6ZNL4,Q17RV9,…	1611	329	13528	1.8377	0.00128466	1.35313e-05	0.000636989
GOTERM_BP_FAT	GO:0048285~organelle fission	55	2.89169	4.93254e-07	P07437,Q6IQ37,Q15003,Q6NSH4,Q53FN2,Q32Q15,Q68DE9,P43034,Q05BV1,Q9NTJ3,Q9NQW6,Q7Z2X1,Q6LC01,Q6PEK6,Q3ZCR3,Q9UQE7,Q53G92,Q05C84,Q9NTI5,Q6NSG3,A8K7C4,A8K7C6,Q59HB8,A7E2C4,Q6PK02,Q86VX4,P14635,Q3SYK8,P53041,A6NJ42,Q6MZP3,Q05D74,A8K4X9,Q9BUV3,Q9UPG3,Q8TD19,Q14683,Q6IPS5,Q05D70,O60313,Q5TZP9,Q96FC3,Q59F36,Q9H2R7,Q14978,O43823,Q643R0,Q4VBY6,Q2TA89,Q8TDA3,O43264,Q4W5I2,Q5QPR3,Q2M5E1,Q5QPR4,Q59EY4,Q53QU3,…	1611	229	13528	2.01681	0.00183371	1.81721e-05	0.000909484
GOTERM_BP_FAT	GO:0051301~cell division	66	3.47003	4.95755e-07	O75351,Q6NSH4,Q32Q15,P43034,Q68DE9,Q9UE82,P23528,Q05BV1,Q9NTJ3,Q4W4Y1,Q9NQW6,Q7Z2X1,Q6NT82,A6NGM0,Q6FGI9,Q59F49,Q05C84,Q6PK95,Q9NTI5,Q6NSG3,Q13464,A7E2C4,P14635,Q6MZP3,Q5TZP9,Q5T2U1,Q4VBY6,Q60FE2,A8K5E3,O43264,A6NNR3,Q4W5I2,Q2M5E1,Q53QU3,Q68DW7,A8K6E5,Q6AI02,A8MSG9,Q8WUG4,Q29RF7,Q9UNS1,P24941,Q6P712,Q8TC62,Q86XU5,Q6ZNL4,Q59EP1,Q86WG4,Q5T9A4,A1XKG3,Q5H9N4,Q15753,Q6MZM3,Q2KQ72,Q6MZM4,Q69YV3,Q68EN4,…	1611	295	13528	1.87871	0.00184301	1.80852e-05	0.000914096
GOTERM_BP_FAT	GO:0022403~cell cycle phase	84	4.4164	9.56175e-07	P07437,Q6NSH4,Q32Q15,Q68DE9,P43034,Q3SWU9,Q05BV1,Q9NTJ3,Q9NQW6,Q7Z2X1,Q6LC01,Q308M6,Q6FGI9,Q59G27,Q5T2B5,Q96GF2,Q5T2B7,Q53G92,Q05C84,Q9NTI5,A8K6F2,Q6NSG3,Q59HB8,A7E2C4,Q96CE4,P14635,A6NJ42,Q6MZP3,Q9BUV3,Q9UPG3,Q59GP7,Q5TZP9,Q96FC3,Q59F36,Q86W55,O75376,Q4VBY6,Q60FE2,Q9UPH5,A8K5E3,O43264,Q4W5I2,Q2M5E1,Q53QU3,Q5SU16,Q68DW7,A8K6E5,Q6LCB2,Q6AI02,Q8WUG4,Q9BV28,Q29RF7,Q13632,P83731,Q9UNS1,P24941,Q6P712,…	1611	414	13528	1.70379	0.00355161	3.35648e-05	0.00176303
GOTERM_BP_FAT	GO:0000087~M phase of mitotic cell cycle	53	2.78654	1.32627e-06	P07437,Q6IQ37,Q15003,Q6NSH4,Q53FN2,Q32Q15,Q68DE9,P43034,Q05BV1,Q9NTJ3,Q9NQW6,Q7Z2X1,Q6LC01,Q3ZCR3,Q9UQE7,Q53G92,Q05C84,Q9NTI5,Q6NSG3,A8K7C4,A8K7C6,Q59HB8,A7E2C4,Q6PK02,Q86VX4,P14635,Q3SYK8,P53041,A6NJ42,Q6MZP3,Q05D74,Q9BUV3,Q9UPG3,Q8TD19,Q14683,Q6IPS5,Q05D70,Q5TZP9,Q96FC3,Q59F36,Q9H2R7,Q14978,O43823,Q643R0,Q4VBY6,Q2TA89,Q8TDA3,O43264,Q4W5I2,Q5QPR3,Q2M5E1,Q5QPR4,Q59EY4,Q53QU3,Q5SU16,Q59GZ5,P63279,…	1611	224	13528	1.98685	0.00492289	4.61208e-05	0.00244541
GOTERM_BP_FAT	GO:0000280~nuclear division	52	2.73396	1.74704e-06	P07437,Q6IQ37,Q15003,Q6NSH4,Q53FN2,Q32Q15,Q68DE9,P43034,Q05BV1,Q9NTJ3,Q9NQW6,Q7Z2X1,Q6LC01,Q3ZCR3,Q9UQE7,Q53G92,Q05C84,Q9NTI5,Q6NSG3,A8K7C4,A8K7C6,Q59HB8,A7E2C4,Q6PK02,Q86VX4,P14635,Q3SYK8,P53041,A6NJ42,Q6MZP3,Q05D74,Q9BUV3,Q9UPG3,Q8TD19,Q14683,Q6IPS5,Q05D70,Q5TZP9,Q96FC3,Q59F36,Q9H2R7,Q14978,O43823,Q643R0,Q4VBY6,Q2TA89,Q8TDA3,O43264,Q4W5I2,Q5QPR3,Q2M5E1,Q5QPR4,Q59EY4,Q53QU3,Q5SU16,Q59GZ5,P63279,…	1611	220	13528	1.98481	0.00647966	5.85636e-05	0.00322124
GOTERM_BP_FAT	GO:0007067~mitosis	52	2.73396	1.74704e-06	P07437,Q6IQ37,Q15003,Q6NSH4,Q53FN2,Q32Q15,Q68DE9,P43034,Q05BV1,Q9NTJ3,Q9NQW6,Q7Z2X1,Q6LC01,Q3ZCR3,Q9UQE7,Q53G92,Q05C84,Q9NTI5,Q6NSG3,A8K7C4,A8K7C6,Q59HB8,A7E2C4,Q6PK02,Q86VX4,P14635,Q3SYK8,P53041,A6NJ42,Q6MZP3,Q05D74,Q9BUV3,Q9UPG3,Q8TD19,Q14683,Q6IPS5,Q05D70,Q5TZP9,Q96FC3,Q59F36,Q9H2R7,Q14978,O43823,Q643R0,Q4VBY6,Q2TA89,Q8TDA3,O43264,Q4W5I2,Q5QPR3,Q2M5E1,Q5QPR4,Q59EY4,Q53QU3,Q5SU16,Q59GZ5,P63279,…	1611	220	13528	1.98481	0.00647966	5.85636e-05	0.00322124
Annotation Cluster 24	Enrichment Score: 8.388707715627357
Category	Term	Count	%	PValue	Genes	List Total	Pop Hits	Pop Total	Fold Enrichment	Bonferroni	Benjamini	FDR
GOTERM_BP_FAT	GO:0006259~DNA metabolic process	116	6.09884	2.28384e-12	A4QPB4,Q6PJY7,Q6VMB5,Q05BV8,A8K6G2,Q3SWU9,P23246,Q5VXV2,Q09028,Q5VXV3,Q4ZG57,Q13564,Q308M6,Q2HIX7,A7E2X7,Q0EF63,Q96Q15,Q2XSC7,Q0EF62,Q6VBB7,Q8WYH8,Q6FHQ0,Q59F49,Q05DP8,Q6PK95,Q0VAE4,Q01105,A8K6H2,Q9UHN1,Q00577,O95251,Q6FI35,Q6LEN1,P23921,Q04837,P55209,Q59FP7,Q9NUL1,Q6NR85,Q5TZP7,Q96AM7,Q8TD98,Q1L6K4,P26358,Q19RW5,Q1L6K6,Q53XI7,Q53T61,P09874,P20962,Q0ZAI9,Q5M7Z1,Q0VGA3,Q0Z7V0,A8K6E7,Q53HK8,Q6IPL9,…	1611	506	13528	1.92507	8.49817e-09	2.07272e-10	4.21106e-09
GOTERM_BP_FAT	GO:0006974~response to DNA damage stimulus	86	4.52156	1.61408e-09	A4QPB4,Q6VMB5,Q05BV8,A8K6G2,Q3SWU9,P23246,Q13564,Q308M6,Q0EF63,A7E2X7,Q2HIX7,Q0EF62,Q2XSC7,Q96Q15,Q6VBB7,P23396,Q05DP8,Q0VAE4,Q9UHN1,Q6FI35,Q6LEN1,Q9NUL1,Q6NR85,Q96AM7,Q5TZP7,Q1L6K4,Q86W56,Q19RW5,Q1L6K6,P09874,Q0ZAI9,Q0VGA3,Q5M7Z1,Q0Z7V0,Q16344,A8K6E7,Q53HK8,Q8NDD7,Q969X9,Q6FG89,P61088,Q9UNS1,Q9BZF9,Q96B01,P13051,P26583,A6NFL4,Q5CZ96,Q4ZFX8,Q0EFC2,Q2XN98,P31947,Q15819,Q5H9N4,O95831,Q15233,Q9ULC4,…	1611	373	13528	1.9361	6.00598e-06	8.34166e-08	2.97613e-06
GOTERM_BP_FAT	GO:0033554~cellular response to stress	115	6.04627	6.591e-09	A4QPB4,Q6VMB5,Q05BV8,A8K6G2,Q308M2,Q3SWU9,P23246,A1L4K2,Q05CI5,Q13564,Q308M6,Q2HIX7,A7E2X7,Q0EF63,Q2Q9B7,Q96Q15,Q2XSC7,Q0EF62,Q6VBB7,P23396,Q05DP8,Q9UJU6,Q0VAE4,Q9UHN1,Q05BW8,P49588,Q0PHS1,Q6PJX4,Q0PHS4,Q7Z777,Q32Q22,Q6FI35,Q6LEN1,P09493,Q8TCG4,Q9NUL1,Q6NR85,Q5TZP7,Q96AM7,Q1L6K4,Q86W56,Q19RW5,Q1L6K6,P04040,Q9UC85,P09874,Q4VBY4,Q0ZAI9,Q5H9P1,Q5M7Z1,Q0VGA3,Q0Z7V0,Q13098,Q16344,A8K6E7,Q53HK8,P11021,…	1611	566	13528	1.70616	2.45248e-05	3.18508e-07	1.21528e-05
SP_PIR_KEYWORDS	DNA damage	48	2.52366	2.6546e-08	Q16531,Q9BSV4,Q86UJ6,Q68CN2,P52701,Q05BV8,P49916,P23246,Q3SWU9,Q502X6,A2AB04,Q59GH7,Q53T09,Q92466,Q2HIX7,A7E2X7,Q96Q15,Q6IC76,A6NM81,Q6VBB7,Q9UQE7,Q7Z5K8,Q0VAE4,Q92878,Q68DM5,Q14676,Q86VX4,Q53GS1,A8K5M6,Q08945,A6NG77,Q8IY18,Q14683,Q9HAW4,Q53H47,A8K111,Q5TZP7,Q92889,P12956,Q1RMC6,A8K7D3,Q1RMC5,P09874,Q0ZAI9,Q5M7Z1,Q0VGA3,A7YY86,Q0Z7V0,Q5UIP0,Q53SD0,P27695,Q969X9,Q9UIG0,A2A2W2,Q6FG89,Q71SV8,P61088,…	1895	205	19235	2.37668	1.683e-05	3.23657e-07	3.95022e-05
SP_PIR_KEYWORDS	dna repair	45	2.36593	6.30268e-08	Q16531,Q9BSV4,P04406,P52701,Q68CN2,A8K6G2,Q05BV8,P49916,Q3SWU9,P23246,A2AB04,Q59GH7,Q53T09,Q92466,Q2HIX7,A7E2X7,Q96Q15,Q6IC76,A6NM81,Q6VBB7,Q9UQE7,Q7Z5K8,Q0VAE4,Q92878,Q68DM5,Q14676,Q86VX4,Q53GS1,A8K5M6,Q08945,A6NG77,Q53X65,Q8IY18,Q14683,Q9HAW4,Q53H47,A8K111,Q5TZP7,Q92889,Q2TSD0,P12956,Q1RMC6,A8K7D3,Q1RMC5,P09874,Q0ZAI9,Q5M7Z1,Q0VGA3,A7YY86,Q0Z7V0,Q5ZEY3,Q53SD0,P27695,Q969X9,A2A2W2,Q6FG89,Q71SV8,…	1895	191	19235	2.39145	3.99582e-05	7.13553e-07	9.37878e-05
GOTERM_BP_FAT	GO:0006281~DNA repair	66	3.47003	1.14469e-07	Q6VMB5,Q05BV8,A8K6G2,Q3SWU9,P23246,Q308M6,A7E2X7,Q2HIX7,Q96Q15,Q2XSC7,Q6VBB7,Q05DP8,Q0VAE4,Q9UHN1,Q6FI35,Q6LEN1,Q9NUL1,Q6NR85,Q5TZP7,Q96AM7,Q19RW5,P09874,Q0ZAI9,Q0VGA3,Q5M7Z1,Q0Z7V0,A8K6E7,Q53HK8,Q969X9,Q6FG89,P61088,Q96B01,P13051,P26583,A6NFL4,Q5CZ96,Q4ZFX8,Q0EFC2,Q2XN98,Q15819,Q15233,Q9HD60,Q68EN4,Q9HCS7,Q4ZJI1,Q9NR54,Q1MSW8,Q5T399,Q9Y5B9,P04179,A5D8W9,Q53FK0,Q7Z6A3,Q13112,Q7Z6A1,Q7Z6A2,Q1MSX0,…	1611	284	13528	1.95148	0.000425847	4.95275e-06	0.000211063
Annotation Cluster 25	Enrichment Score: 8.315190847401057
Category	Term	Count	%	PValue	Genes	List Total	Pop Hits	Pop Total	Fold Enrichment	Bonferroni	Benjamini	FDR
SMART	SM00382:AAA	43	2.26078	7.51351e-11	Q92862,O75351,P35249,Q9P172,P35250,Q9NXK5,P35251,Q9NRK6,Q5ZF01,Q5U0C2,Q6DKG1,A8K8F1,Q8NBU5,Q5T8D2,Q6AI22,Q8TA92,Q9NQ51,Q6NZY0,A8MWZ0,Q5T8D9,Q7Z777,Q9H834,Q6NW36,O95786,Q9NU22,A4D0Q1,Q6P1Q8,Q75MT5,P43686,P35998,Q9H072,Q6NUN5,Q6PIW4,Q0QEN7,P62195,P61221,Q9H078,Q96F82,Q3B797,Q59GS3,A8K6E7,Q53HK8,Q96I63,Q6PL18,Q9H8B9,Q9UF30,P06576,Q5W0E8,Q3LIA5,P40938,A8K3H1,Q96T67,Q5T9A4,Q96DA3,Q5SV24,Q75L23,Q53HB3,…	909	144	9079	2.9825	2.17892e-08	4.35784e-09	9.9884e-08
INTERPRO	IPR003593:ATPase, AAA+ type, core	43	2.26078	1.08086e-09	Q92862,O75351,P35249,Q9P172,P35250,Q9NXK5,P35251,Q9NRK6,Q5ZF01,Q5U0C2,Q6DKG1,A8K8F1,Q8NBU5,Q5T8D2,Q6AI22,Q8TA92,Q9NQ51,Q6NZY0,A8MWZ0,Q5T8D9,Q7Z777,Q9H834,Q6NW36,O95786,Q9NU22,A4D0Q1,Q6P1Q8,Q75MT5,P43686,P35998,Q9H072,Q6NUN5,Q6PIW4,Q0QEN7,P62195,P61221,Q9H078,Q96F82,Q3B797,Q59GS3,A8K6E7,Q53HK8,Q96I63,Q6PL18,Q9H8B9,Q9UF30,P06576,Q5W0E8,Q3LIA5,P40938,A8K3H1,Q96T67,Q5T9A4,Q96DA3,Q5SV24,Q75L23,Q53HB3,…	1804	144	16659	2.75752	2.49678e-06	2.08065e-07	1.88961e-06
INTERPRO	IPR003959:ATPase, AAA-type, core	23	1.20925	1.37561e-09	O75351,A8K3H1,Q96T67,Q5T9A4,P35249,Q5SV24,Q75L23,Q53HB3,A8K763,Q14756,P35250,Q9NXK5,P35251,Q49AN7,Q6DKG1,Q9Y265,Q8NBU5,Q9Y4W6,Q5T8D2,Q53XL8,Q96S55,Q5SV16,Q5SV14,Q8TA92,Q9NQ51,A8MWZ0,Q5T8D9,A8K2M0,Q9H834,Q6NW36,A4D0Q1,Q13415,P62191,Q16594,Q75MT5,P43686,P35998,Q9NVI7,Q96TA2,Q69HW4,Q6PIW4,P62195,Q96F82,Q59GS3,A8K6E7,Q96I63,Q6PL18,Q9UN37,Q9Y2Q2,Q9UF30,Q3LIA5,P62333	1804	49	16659	4.33455	3.17765e-06	2.44435e-07	2.4049e-06
INTERPRO	IPR003960:ATPase, AAA-type, conserved site	15	0.788644	4.91054e-06	P43686,P35998,Q96TA2,O75351,Q69HW4,Q6PIW4,Q75L23,P62195,Q53HB3,A8K763,Q9NXK5,Q49AN7,Q59GS3,Q6DKG1,Q8NBU5,Q9Y4W6,Q5T8D2,Q96I63,Q53XL8,Q6PL18,Q96S55,Q5SV16,Q8TA92,Q9NQ51,Q9UN37,A8MWZ0,Q9Y2Q2,Q5T8D9,Q9UF30,A8K2M0,Q3LIA5,Q6NW36,A4D0Q1,P62333,P62191	1804	34	16659	4.07403	0.0112793	0.000420037	0.00858447
Annotation Cluster 26	Enrichment Score: 8.137138463710722
Category	Term	Count	%	PValue	Genes	List Total	Pop Hits	Pop Total	Fold Enrichment	Bonferroni	Benjamini	FDR
SP_PIR_KEYWORDS	actin-binding	61	3.20715	2.72329e-11	Q5VU64,Q5VU66,Q596K9,O60610,Q8NF52,Q68DU3,Q8IY98,Q9BR76,Q9UE82,P23528,A2A418,Q9NQW6,Q59EA2,Q9H7Z5,O43491,Q86TQ3,P07737,Q8WXH0,Q5HY53,P59998,Q5VU70,Q5VU71,Q5VU72,Q5HY55,Q9UJU6,Q5HY54,Q96SB3,Q5TBN4,Q68DV2,Q5TBN3,O75369,P09493,Q6MZP0,Q59FP5,Q14917,Q8TCG4,Q8TCG3,Q59ER5,P13796,Q99439,P18206,Q96IL1,P07951,Q60FE6,Q60FE7,Q60FE2,Q0P5N8,Q60FE5,Q6NXF2,Q53GK7,O75083,A8K6E9,Q8TES4,Q96B17,Q5VU59,Q5VU58,Q9UCI1,…	1895	247	19235	2.50678	1.72656e-08	4.93304e-10	4.05242e-08
GOTERM_CC_FAT	GO:0015629~actin cytoskeleton	66	3.47003	1.24644e-09	Q5VU64,Q5VU66,Q59HA3,Q8NF52,Q68DU3,Q8IY98,Q8WVW5,A2A418,Q9UE82,P23528,Q562S2,Q9NQW6,Q59EA2,O43491,Q9H7Z5,Q86TQ3,P07737,Q562R8,Q9Y696,Q9BUS0,Q5HY53,Q9UJU1,P59998,Q5VU70,Q5VU71,Q5HY55,Q5VU72,P14649,Q5HY54,Q96SB3,Q5TBN4,Q68DV2,Q5TBN3,O75369,P09493,Q59FP5,Q8TCG4,Q14917,Q8TCG3,P13796,P18206,P33241,P07951,Q60FE6,Q60FE7,Q60FE2,Q60FE5,A7MD22,Q6NXF2,Q28617,Q562P0,Q8TES4,Q96B17,Q5VU59,Q5VU58,Q9UCI1,Q9UCI2,…	1438	269	12782	2.18088	8.16417e-07	1.85549e-08	1.86298e-06
GOTERM_MF_FAT	GO:0003779~actin binding	75	3.94322	8.12564e-08	Q5VU64,Q5VU66,Q59HA3,Q596K9,Q8NF52,O60610,Q68DU3,Q8IY98,Q9BR76,A2A418,Q9UE82,P23528,Q9NQW6,Q59EA2,Q9H7Z5,O43491,Q86TQ3,P07737,Q8WXH0,Q5HY53,Q9UJU1,P59998,Q5VU70,Q5VU71,A6ND53,Q5HY55,Q5VU72,Q5HY54,Q9UJU6,Q96SB3,Q5TBN4,Q05BW8,Q68DV2,Q5TBN3,O75369,P09493,Q6MZP0,Q59FP5,Q8TCG4,Q14917,Q59ER5,Q8TCG3,P13796,Q99439,P18206,P33241,Q96IL1,P07951,Q60FE6,Q60FE7,Q60FE2,Q4VBY4,Q5H9P1,Q60FE5,Q0P5N8,A7MD22,Q6NXF2,…	1596	326	12983	1.87148	0.000102622	3.80099e-06	0.000132201
GOTERM_MF_FAT	GO:0008092~cytoskeletal protein binding	100	5.25762	1.02524e-06	Q5VU64,P17655,Q59HA3,Q5VU66,Q596K9,O60610,Q8NF52,Q68DU3,Q8IY98,Q9BR76,P43034,A2A418,Q9UE82,P23528,Q32Q12,Q59EA2,Q9NQW6,O43491,Q9H7Z5,Q8TBV2,Q86TQ3,P07737,Q8WXH0,Q9UJU1,Q5HY53,P59998,Q59G27,Q5VU70,Q5VU71,A6ND53,Q5VU72,Q5HY55,Q9UJU6,Q5HY54,Q96SB3,Q5TBN4,Q05BW8,Q68DV2,Q59HB8,Q5TBN3,O75369,Q96CE4,P09493,Q6MZP0,Q9UPG3,Q59FP5,Q8TCG4,Q14917,Q86TP8,Q59ER5,Q8TCG3,P13796,Q99439,P18206,P33241,Q96IL1,P07951,…	1596	504	12983	1.61403	0.00129404	4.46498e-05	0.00166801
Annotation Cluster 27	Enrichment Score: 8.030962406208873
Category	Term	Count	%	PValue	Genes	List Total	Pop Hits	Pop Total	Fold Enrichment	Bonferroni	Benjamini	FDR
SMART	SM00249:PHD	34	1.78759	9.03271e-12	A4KYM4,Q69YR9,A4KYM6,Q2HXV9,Q86UJ6,Q2HXV8,Q2HXV7,Q2HXV5,Q9UPN9,Q99414,Q12830,Q6PIA1,Q05DA0,Q59G93,Q5CZ83,Q0VGM1,O94953,Q2HXV3,Q2HXV4,Q2HIX7,Q2HXV1,Q0EF63,Q2HXV2,Q0EF62,Q8WYH8,Q9ULU4,A8MZC9,Q5VWG9,Q7Z6E0,Q17RB6,Q7Z5J4,Q9HB80,P55201,Q59FG6,Q8TD98,Q4VBQ6,A7MCZ3,Q92794,A7MCZ1,Q9UIF8,A8K1P3,Q9BVI0,Q86U89,Q8NEZ4,Q5JV90,Q8NC87,P23497,Q57Z54,A8MSQ1,Q9UIG0,Q59FF2,Q2TAZ1,Q8N4T7,Q14839,Q6P1K4,Q66K49,Q9UMN6,…	909	90	9079	3.77321	2.61947e-09	6.54868e-10	1.2008e-08
INTERPRO	IPR019787:Zinc finger, PHD-finger	33	1.73502	7.6816e-11	A4KYM4,Q69YR9,A4KYM6,Q2HXV9,Q86UJ6,Q2HXV8,Q2HXV7,Q2HXV5,Q9UPN9,Q99414,Q12830,Q6PIA1,Q05DA0,Q59G93,Q5CZ83,Q0VGM1,O94953,Q2HXV3,Q2HXV4,Q2HIX7,Q2HXV1,Q0EF63,Q2HXV2,Q0EF62,Q8WYH8,Q9ULU4,A8MZC9,Q5VWG9,Q7Z6E0,Q17RB6,Q9HB80,P55201,Q59FG6,Q8TD98,Q4VBQ6,A7MCZ3,Q92794,A7MCZ1,Q9UIF8,A8K1P3,Q9BVI0,Q86U89,Q8NEZ4,Q5JV90,Q8NC87,P23497,Q57Z54,A8MSQ1,Q9UIG0,Q59FF2,Q2TAZ1,Q8N4T7,Q14839,Q6P1K4,Q66K49,Q9UMN6,Q9BT87,…	1804	85	16659	3.58515	1.77445e-07	2.21806e-08	1.34293e-07
INTERPRO	IPR001965:Zinc finger, PHD-type	34	1.78759	8.89748e-11	A4KYM4,Q69YR9,A4KYM6,Q2HXV9,Q86UJ6,Q2HXV8,Q2HXV7,Q2HXV5,Q9UPN9,Q99414,Q12830,Q6PIA1,Q05DA0,Q59G93,Q5CZ83,Q0VGM1,O94953,Q2HXV3,Q2HXV4,Q2HIX7,Q2HXV1,Q0EF63,Q2HXV2,Q0EF62,Q8WYH8,Q9ULU4,A8MZC9,Q5VWG9,Q7Z6E0,Q17RB6,Q7Z5J4,Q9HB80,P55201,Q59FG6,Q8TD98,Q4VBQ6,A7MCZ3,Q92794,A7MCZ1,Q9UIF8,A8K1P3,Q9BVI0,Q86U89,Q8NEZ4,Q5JV90,Q8NC87,P23497,Q57Z54,A8MSQ1,Q9UIG0,Q59FF2,Q2TAZ1,Q8N4T7,Q14839,Q6P1K4,Q66K49,Q9UMN6,…	1804	90	16659	3.48858	2.05532e-07	2.28368e-08	1.55549e-07
INTERPRO	IPR019786:Zinc finger, PHD-type, conserved site	32	1.68244	4.86872e-09	A4KYM4,A4KYM6,Q69YR9,Q2HXV9,Q86UJ6,Q2HXV8,Q2HXV7,Q2HXV5,Q9UPN9,Q05DA0,Q59G93,Q5CZ83,Q0VGM1,O94953,Q2HXV3,Q2HXV4,Q2HIX7,Q2HXV1,Q0EF63,Q2HXV2,Q0EF62,Q8WYH8,Q9ULU4,A8MZC9,Q5VWG9,Q7Z6E0,Q17RB6,Q7Z5J4,Q9HB80,P55201,Q8TD98,Q4VBQ6,A7MCZ3,Q92794,A7MCZ1,Q9UIF8,A8K1P3,Q9BVI0,Q86U89,Q5JV90,Q8NC87,P23497,Q57Z54,A8MSQ1,Q9UIG0,Q59FF2,Q8N4T7,Q14839,Q6P1K4,Q66K49,Q9UMN6,Q9BT87,Q05DG0,Q5TH08,Q96T23,Q5TH12,Q5TH11,…	1804	93	16659	3.17746	1.12467e-05	7.49783e-07	8.51171e-06
UP_SEQ_FEATURE	zinc finger region:PHD-type	21	1.1041	3.87197e-08	A4KYM4,A4KYM6,Q86UJ6,Q2HXV9,Q2HXV8,Q2HXV7,Q2HXV5,Q9UPN9,Q9H702,Q8TCM6,O95696,Q659H0,Q5GRH6,Q05DA0,Q59G93,Q7Z5E2,Q5CZ83,Q0VGM1,Q2HXV3,Q2HXV4,Q2HIX7,Q2HXV1,Q0EF63,Q2HXV2,Q0EF62,Q86U63,Q8WYH8,Q9ULU4,A8MZC9,Q5VWG9,Q7Z6E0,Q86X06,Q17RB6,Q7Z5J4,Q569J9,Q8TE92,P55201,Q4VBQ6,Q566Q2,Q96T88,Q59EC8,Q53NU6,Q9UIF8,A8K1P3,Q9BVI0,Q6MZK7,Q9UNL4,Q86U89,Q5JV90,Q8NC87,Q3B7K5,Q13263,A6NJE2,Q57Z54,A0JBR2,Q9UIG0,P46100,…	1886	52	19113	4.09264	0.000164468	1.028e-05	7.24214e-05
UP_SEQ_FEATURE	zinc finger region:PHD-type 2	13	0.683491	1.29786e-05	Q8TD98,A7MCZ3,Q76L81,Q69YR9,A2A2T3,Q12873,Q92794,A7MCZ1,Q99414,O96028,Q12830,Q6PIA1,Q6N019,Q8WYB5,Q8NEZ4,O94953,Q9UPD0,Q9BZ95,Q05CG6,A8MSQ1,Q59FF2,Q2TAZ1,Q14839,Q9H5E0,O94880,Q9UMN6,Q03164,O14686,Q9HBJ3,Q9HBJ4,Q75MN6,Q9HB80,Q59FG6,A5PKX7	1886	30	19113	4.39146	0.053641	0.0022029	0.0242723
UP_SEQ_FEATURE	zinc finger region:PHD-type 1	13	0.683491	4.01932e-05	Q8TD98,A7MCZ3,Q76L81,Q69YR9,A2A2T3,Q12873,Q92794,A7MCZ1,Q99414,O96028,Q12830,Q6PIA1,Q6N019,Q8WYB5,Q8NEZ4,O94953,Q9UPD0,Q9BZ95,Q05CG6,A8MSQ1,Q59FF2,Q2TAZ1,Q14839,Q9H5E0,O94880,Q9UMN6,Q03164,O14686,Q9HBJ3,Q9HBJ4,Q75MN6,Q9HB80,Q59FG6,A5PKX7	1886	33	19113	3.99224	0.156963	0.00567531	0.0751507
Annotation Cluster 28	Enrichment Score: 7.989026965562532
Category	Term	Count	%	PValue	Genes	List Total	Pop Hits	Pop Total	Fold Enrichment	Bonferroni	Benjamini	FDR
SMART	SM00297:BROMO	20	1.05152	1.42595e-09	P51531,Q2HXV9,Q86UJ6,Q2HXV8,Q2HXV7,Q2HXV5,Q9UPN9,Q12830,P51532,Q8TCM6,O95696,Q659H0,Q75MY6,Q38HM2,Q59G93,Q5CZ83,Q2HXV3,Q2HXV4,Q2HXV1,Q2HXV2,A7J992,Q9ULU4,Q9H5E0,Q9NWP3,Q7Z6E0,Q03164,Q86X06,O60885,Q17RB6,Q569J9,Q8TE92,Q9HBD4,P55201,Q9HB80,Q8WWQ0,Q8NDF4,Q8TD98,Q53TD0,Q92793,Q59FZ6,Q9UIF8,Q9H8M2,Q6MZK7,Q5JV90,Q9UPD0,Q8NC87,Q3B7K5,P23497,Q13263,A6NJE2,A6NFY8,Q09472,Q9UIG0,Q59FF2,Q6PL18,Q8N4T7,Q6P1K4,…	909	40	9079	4.99395	4.13525e-07	5.9075e-08	1.89564e-06
INTERPRO	IPR001487:Bromodomain	20	1.05152	5.71202e-09	P51531,Q2HXV9,Q86UJ6,Q2HXV8,Q2HXV7,Q2HXV5,Q9UPN9,Q12830,P51532,Q8TCM6,O95696,Q659H0,Q75MY6,Q38HM2,Q59G93,Q5CZ83,Q2HXV3,Q2HXV4,Q2HXV1,Q2HXV2,A7J992,Q9ULU4,Q9H5E0,Q9NWP3,Q7Z6E0,Q03164,Q86X06,O60885,Q17RB6,Q569J9,Q8TE92,Q9HBD4,P55201,Q9HB80,Q8WWQ0,Q8NDF4,Q8TD98,Q53TD0,Q92793,Q59FZ6,Q9UIF8,Q9H8M2,Q6MZK7,Q5JV90,Q9UPD0,Q8NC87,Q3B7K5,P23497,Q13263,A6NJE2,A6NFY8,Q09472,Q9UIG0,Q59FF2,Q6PL18,Q8N4T7,Q6P1K4,…	1804	40	16659	4.61724	1.31947e-05	8.24673e-07	9.98601e-06
SP_PIR_KEYWORDS	bromodomain	19	0.998948	5.74943e-09	P51531,Q2HXV9,Q86UJ6,Q2HXV8,Q2HXV7,Q2HXV5,Q9UPN9,Q12830,Q8TCM6,P51532,O95696,Q659H0,Q75MY6,Q38HM2,Q59G93,Q5CZ83,Q2HXV3,Q2HXV4,Q2HXV1,Q2HXV2,A7J992,Q9ULU4,Q9H5E0,Q9NWP3,Q7Z6E0,Q03164,Q86X06,O60885,Q92831,Q17RB6,Q569J9,Q8TE92,P55201,Q9HB80,Q8WWQ0,Q9HBD4,Q8NDF4,Q8TD98,Q92793,Q59FZ6,Q9UIF8,Q9H8M2,Q6MZK7,Q5JV90,Q9UPD0,Q8NC87,Q3B7K5,A6NJE2,A6NFY8,Q09472,Q9UIG0,Q59FF2,Q6PL18,Q8N4T7,Q6P1K4,Q9ULD4,Q4G0V0,…	1895	39	19235	4.94506	3.64513e-06	7.92421e-08	8.55551e-06
UP_SEQ_FEATURE	domain:Bromo	16	0.84122	8.2958e-09	P51531,Q86UJ6,Q2HXV9,Q2HXV8,Q2HXV7,Q9UPN9,Q2HXV5,Q12830,Q8TCM6,P51532,O95696,Q659H0,Q75MY6,Q38HM2,Q59G93,Q5CZ83,Q2HXV3,Q2HXV4,Q2HXV1,Q2HXV2,Q9ULU4,Q9H5E0,Q7Z6E0,Q86X06,Q92831,Q17RB6,Q569J9,Q8TE92,P55201,Q9HBD4,Q8NDF4,Q92793,Q59FZ6,Q9UIF8,Q9H8M2,Q6MZK7,Q5JV90,Q8NC87,Q3B7K5,Q13263,A6NJE2,A6NFY8,Q09472,Q9UIG0,Q6PL18,Q8N4T7,Q6P1K4,Q9ULD4,Q4G0V0,Q5TH08,Q9Y4Q3,Q4LE28,A7E2E1,Q5TH12,Q5TH11,Q53TG3,Q2HXW0,…	1886	28	19113	5.79094	3.52399e-05	2.93671e-06	1.55165e-05
INTERPRO	IPR018359:Bromodomain, conserved site	17	0.893796	2.92071e-07	P51531,Q86UJ6,Q9UPN9,Q92793,Q59FZ6,Q12830,Q9UIF8,P51532,Q8TCM6,Q9H8M2,O95696,Q659H0,Q6MZK7,Q38HM2,Q75MY6,Q59G93,Q5CZ83,Q3B7K5,Q8NC87,Q13263,A7J992,A6NJE2,A6NFY8,Q9UIG0,Q09472,Q6PL18,Q9H5E0,Q8N4T7,Q6P1K4,Q9NWP3,Q9ULD4,Q7Z6E0,Q86X06,Q9H0E9,O60885,Q4G0V0,Q9Y4Q3,Q4LE28,A7E2E1,Q96HN0,Q53TG3,Q17RB6,Q7Z6C1,Q8TE92,Q9HBD4,Q8WWQ0,P55201,Q8NDF4	1804	36	16659	4.36073	0.000674458	3.37337e-05	0.000510611
Annotation Cluster 29	Enrichment Score: 7.615633974170699
Category	Term	Count	%	PValue	Genes	List Total	Pop Hits	Pop Total	Fold Enrichment	Bonferroni	Benjamini	FDR
GOTERM_MF_FAT	GO:0008135~translation factor activity, nucleic acid binding	40	2.10305	4.34388e-12	Q96CD8,P23193,Q9H8Z6,P29692,Q6NSH7,Q8N7H0,Q05CQ1,Q6FG33,Q9NRA8,Q75MU2,Q96GF2,Q53YD7,Q53HM9,Q2F840,Q9H2I7,Q05639,P68104,P49411,Q2F837,Q6IPS9,Q04637,Q8TA90,Q2F838,Q4VBZ6,Q53GA1,Q53SI8,P41567,P60842,P20042,Q13347,Q8WTV7,Q59GP5,Q8N5A0,Q9NZS6,Q6P082,Q6IAV3,Q96I38,P63241,Q6IPT9,Q9BW34,Q96RE1,Q92905,A6NLY9,Q5SWC3,O43432,Q5JR01,Q8TDJ6,Q6P1R0,O60739,Q53F41,Q8TBL1,P15170,Q5VTE0,Q6FG85,Q96I65,Q9NZE6,Q7Z5T5,…	1596	98	12983	3.32029	5.48629e-09	3.65753e-10	7.06729e-09
SP_PIR_KEYWORDS	Initiation factor	23	1.20925	9.22785e-10	P60228,A8K7Z0,Q14240,Q59FE1,Q59GT8,Q8N7H0,Q3B770,Q05CQ1,Q9NRA8,Q6FG33,A8K0S2,Q3B7I9,O00303,Q75MU2,Q7Z5X3,Q3B7B9,Q4LE58,Q05BS0,Q04637,Q53SI8,P41567,P60842,Q14232,P20042,Q53XC0,Q13347,Q8N5A0,O60841,Q6IAV3,Q4G0E3,A4D208,Q7Z5Y0,Q6GPH5,Q7L2H7,Q9NZR9,A8K7X4,A6NLY9,Q5SWC3,Q8WYK5,P23588,O43432,Q15056,Q6P1R0,Q96G38,O60739,Q59F68,Q53F41,Q59FS8,Q6FG85,Q9NZE6,Q96I65,Q7Z5T5,Q6IBR8,Q86WD0,Q86UM1,Q14152,Q53XJ6,…	1895	52	19235	4.4896	5.85046e-07	1.36057e-08	1.37316e-06
GOTERM_MF_FAT	GO:0003743~translation initiation factor activity	26	1.36698	1.4981e-08	P60228,A8K7Z0,Q59FE1,Q14240,Q8N7H0,Q59GT8,Q3B770,Q05CQ1,Q6FG33,Q9NRA8,A8K0S2,Q3B7I9,O00303,Q75MU2,Q7Z5X3,Q3B7B9,Q4LE58,Q05BS0,Q04637,P41214,Q53SI8,P41567,P60842,Q14232,P20042,Q13347,Q53XC0,Q8WTV7,Q8N5A0,O60841,Q6IAV3,Q4G0E3,A4D208,Q6GPH5,Q7Z5Y0,Q7L2H7,Q9NZR9,A8K7X4,A6NLY9,Q92905,Q5SWC3,Q8WYK5,P23588,O43432,Q15056,Q8TDJ6,Q96G38,Q6P1R0,O60739,Q59F68,Q53F41,Q59FS8,Q6FG85,Q96I65,Q9NZE6,Q6IBR8,Q7Z5T5,…	1596	61	12983	3.46725	1.89208e-05	7.56841e-07	2.43735e-05
GOTERM_BP_FAT	GO:0006413~translational initiation	20	1.05152	2.80322e-07	P60228,A8K7Z0,Q59FE1,Q8N7H0,Q3B770,Q6FG33,A8K0S2,Q3B7I9,P61247,O00303,Q9NQS8,P23396,Q7Z5X3,Q3B7B9,Q05BS0,P41214,P41567,P20042,Q14232,Q13347,Q8WTV7,Q6IAV3,Q6NXR8,A4D208,Q7L2H7,A6NLY9,A8K7X4,Q53G83,Q96G38,Q8TDJ6,Q6P1R0,O60739,Q53F41,P46782,Q59FS8,Q6FG85,Q53G25,Q6IBR8,Q7Z5T5,Q86UM1,Q14152,O60573,Q24JU4,P55884,Q9P1D9,Q9Y262,P08708,Q96I16,Q53HU7,Q8WVK4,Q99613,Q53RG0,Q6IAX5	1611	45	13528	3.73212	0.00104254	1.12158e-05	0.000516872
GOTERM_BP_FAT	GO:0006446~regulation of translational initiation	18	0.946372	1.61479e-06	P60228,Q09161,Q14240,Q59GT8,Q96C20,Q05CQ1,Q6FG33,Q9P2K8,Q75MU2,P52298,Q4LE58,Q04637,Q53SI8,P41567,Q14232,Q53XC0,Q8N5A0,O60841,Q6IAV3,P04792,Q4G0E3,Q96EI7,A4D208,Q6GPH5,Q7Z5Y0,A6NLY9,Q5SWC3,Q8WYK5,P23588,O43432,Q15056,Q96G38,O60739,Q53F41,Q9UC35,A6NH85,Q59FS8,Q6FG85,A3RJH1,Q9NZE6,Q96I65,Q5T7X2,Q86WD0,Q86UM1,Q53XJ6,Q59GJ0,P55884,Q92499,Q53RV7,Q8WVK4,P05198,Q504Z1,Q5JWW0,Q96B07,Q6IB46,Q6IAX5,Q53HQ2	1611	41	13528	3.68661	0.00599063	5.51236e-05	0.0029774
GOTERM_CC_FAT	GO:0005852~eukaryotic translation initiation factor 3 complex	10	0.525762	7.44564e-06	P60228,Q7L2H7,A8K7Z0,A8K7X4,Q92905,Q8N7H0,Q3B770,Q96G38,Q6P1R0,Q6FG33,A8K0S2,O00303,Q7Z5X3,Q3B7B9,Q59FS8,Q7Z5T5,Q86UM1,Q05BS0,Q14152,Q24JU4,P55884,Q9P1D9,Q9Y262,Q13347,Q53HU7,Q8WVK4,Q99613,Q6IAX5,A4D208	1438	15	12782	5.92582	0.00486504	7.86568e-05	0.011128
Annotation Cluster 30	Enrichment Score: 7.428848101065215
Category	Term	Count	%	PValue	Genes	List Total	Pop Hits	Pop Total	Fold Enrichment	Bonferroni	Benjamini	FDR
GOTERM_BP_FAT	GO:0016573~histone acetylation	29	1.52471	1.61123e-14	A4KYM4,A8K4Z1,Q76L81,Q69YR9,Q59EJ8,A4KYM6,Q8TCM6,Q9HAF1,Q9H7Z6,A8K001,O95696,Q5GRH6,Q659H0,Q75MY6,Q38HM2,Q59G93,Q5CZ83,Q0EF63,Q0EF62,Q9Y265,Q8WYH8,Q68DJ2,Q9Y4A5,Q561W3,Q0VAE4,Q59FH1,O75528,Q7Z6E0,Q9NPF5,O95983,O95251,Q86X06,A8K4B7,Q92831,Q9H2F5,A2A2I5,Q17RB6,Q96L91,A8MSW4,Q8TE92,P55201,Q16594,Q4VBQ6,Q92794,O75478,Q53NU6,Q9H8E8,Q92793,Q5TG36,Q5TG38,A4D265,A8K1P3,Q9UNL4,Q8WYB5,A6NJE2,Q57Z54,Q5TG40,…	1611	48	13528	5.07335	5.99015e-11	2.21856e-12	2.96874e-11
GOTERM_CC_FAT	GO:0000123~histone acetyltransferase complex	28	1.47213	1.53928e-13	A4KYM4,Q76L81,Q69YR9,Q59EJ8,A4KYM6,Q9NSJ7,Q1KLZ0,Q9UE89,P60709,Q8TCM6,A8K001,Q9HAF1,Q562S0,O95696,Q5GRH6,Q659H0,Q38HM2,Q75MY6,Q59G93,Q5CZ83,A0JNS3,Q0EF63,Q0EF62,Q9Y265,Q8WYH8,Q68DJ2,Q9Y4A5,Q561W3,Q0VAE4,Q8TBS8,Q59FH1,O75528,Q53G99,Q7Z6E0,Q9NPF5,O95251,Q86X06,Q96HG5,Q96IW5,Q92831,Q9H2F5,Q17RB6,Q96L91,A8MSW4,Q8TE92,P55201,Q16594,Q4VBQ6,Q9UPT9,Q92794,O75478,Q53NU6,Q5TG36,Q92793,Q5TG38,A4D265,A8K1P3,…	1438	50	12782	4.97769	1.00789e-10	2.8797e-12	2.29994e-10
GOTERM_CC_FAT	GO:0035267~NuA4 histone acetyltransferase complex	11	0.578339	2.04695e-07	Q59EJ8,Q9UE89,Q1KLZ0,P60709,Q5TG36,Q5TG38,A4D265,Q9HAF1,Q562S0,A8K001,Q5GRH6,Q53GK6,Q9Y265,Q68DJ2,Q9Y4A5,Q5TG40,Q561W3,Q0VAE4,Q59FH1,Q53G99,Q92993,Q9NPF5,Q53G76,Q9H0E9,Q9NXR8,A6NHB0,Q96HG5,Q9UBU8,Q9H2F5,Q96L91,A8MSW4	1438	14	12782	6.98401	0.000134066	2.6815e-06	0.000305945
GOTERM_BP_FAT	GO:0043967~histone H4 acetylation	13	0.683491	3.90085e-07	A4KYM4,Q4VBQ6,A4KYM6,Q5TG36,Q5TG38,A4D265,Q9HAF1,A8K001,Q5GRH6,Q9UNL4,Q0EF63,Q0EF62,Q9Y265,Q68DJ2,Q9Y4A5,Q5TG40,Q0VAE4,Q59FH1,Q9BT87,Q9NPF5,O95251,Q9NXR8,Q9H0E9,A6NHB0,Q9UBU8,Q9H2F5,Q92613,Q9NQC1,Q96L91,A8MSW4	1611	20	13528	5.45822	0.00145045	1.48112e-05	0.000719258
GOTERM_CC_FAT	GO:0043189~H4/H2A histone acetyltransferase complex	11	0.578339	5.51933e-07	Q59EJ8,Q9UE89,Q1KLZ0,P60709,Q5TG36,Q5TG38,A4D265,Q9HAF1,Q562S0,A8K001,Q5GRH6,Q53GK6,Q9Y265,Q68DJ2,Q9Y4A5,Q5TG40,Q561W3,Q0VAE4,Q59FH1,Q53G99,Q92993,Q9NPF5,Q53G76,Q9H0E9,Q9NXR8,A6NHB0,Q96HG5,Q9UBU8,Q9H2F5,Q96L91,A8MSW4	1438	15	12782	6.51841	0.000361451	6.69472e-06	0.000824941
GOTERM_BP_FAT	GO:0043968~histone H2A acetylation	9	0.473186	1.25827e-05	Q5TG40,Q0VAE4,Q59FH1,Q5TG36,Q9NPF5,Q5TG38,Q9NXR8,Q9H0E9,A4D265,Q9HAF1,A6NHB0,A8K001,Q5GRH6,Q9UBU8,Q9H2F5,Q96L91,A8MSW4,Q9Y265,Q68DJ2,Q9Y4A5	1611	12	13528	6.29795	0.0457415	0.000341698	0.0231982
SP_PIR_KEYWORDS	growth regulation	10	0.525762	0.0723873	Q5TG40,Q59EJ8,Q561W3,Q0VAE4,P06703,Q5TG36,Q13177,Q92993,Q9NPF5,Q5TG38,Q9H0E9,Q9NXR8,A6NHB0,A8K001,Q502X6,Q5GRH6,Q9ULC4,Q9UBU8,Q9H2F5,A8K5M4,Q9Y265,Q68DJ2	1895	53	19235	1.91517	1	0.243152	67.3114
Annotation Cluster 31	Enrichment Score: 7.356620362531403
Category	Term	Count	%	PValue	Genes	List Total	Pop Hits	Pop Total	Fold Enrichment	Bonferroni	Benjamini	FDR
GOTERM_BP_FAT	GO:0006473~protein amino acid acetylation	32	1.68244	2.39741e-16	A4KYM4,A8K4Z1,Q76L81,Q69YR9,Q59EJ8,A4KYM6,Q8TCM6,Q9HAF1,Q9H7Z6,A8K001,O95696,Q5GRH6,Q659H0,Q75MY6,Q38HM2,Q59G93,Q5CZ83,Q0EF63,Q0EF62,Q6P4J0,Q9Y265,Q8WYH8,Q68DJ2,Q9Y4A5,Q561W3,Q0VAE4,Q59FH1,O75528,Q7Z6E0,Q9NPF5,O95983,O95251,Q86X06,A8K4B7,Q92831,Q9H2F5,A2A2I5,Q9BXJ9,Q17RB6,Q96L91,A8MSW4,Q8TE92,P55201,Q16594,Q4VBQ6,Q92794,O75478,Q53NU6,Q9H8E8,Q92793,Q5TG36,Q5TG38,A4D265,A8K1P3,Q9UNL4,Q8WYB5,Q58F05,…	1611	52	13528	5.16755	8.26228e-13	3.93019e-14	4.10783e-13
GOTERM_BP_FAT	GO:0016573~histone acetylation	29	1.52471	1.61123e-14	A4KYM4,A8K4Z1,Q76L81,Q69YR9,Q59EJ8,A4KYM6,Q8TCM6,Q9HAF1,Q9H7Z6,A8K001,O95696,Q5GRH6,Q659H0,Q75MY6,Q38HM2,Q59G93,Q5CZ83,Q0EF63,Q0EF62,Q9Y265,Q8WYH8,Q68DJ2,Q9Y4A5,Q561W3,Q0VAE4,Q59FH1,O75528,Q7Z6E0,Q9NPF5,O95983,O95251,Q86X06,A8K4B7,Q92831,Q9H2F5,A2A2I5,Q17RB6,Q96L91,A8MSW4,Q8TE92,P55201,Q16594,Q4VBQ6,Q92794,O75478,Q53NU6,Q9H8E8,Q92793,Q5TG36,Q5TG38,A4D265,A8K1P3,Q9UNL4,Q8WYB5,A6NJE2,Q57Z54,Q5TG40,…	1611	48	13528	5.07335	5.99015e-11	2.21856e-12	2.96874e-11
GOTERM_BP_FAT	GO:0043543~protein amino acid acylation	32	1.68244	5.98243e-14	A4KYM4,A8K4Z1,Q76L81,Q69YR9,Q59EJ8,A4KYM6,Q8TCM6,Q9HAF1,Q9H7Z6,A8K001,O95696,Q5GRH6,Q659H0,Q75MY6,Q38HM2,Q59G93,Q5CZ83,Q0EF63,Q0EF62,Q6P4J0,Q9Y265,Q8WYH8,Q68DJ2,Q9Y4A5,Q561W3,Q0VAE4,Q59FH1,O75528,Q7Z6E0,Q9NPF5,O95983,O95251,Q86X06,A8K4B7,Q92831,Q9H2F5,A2A2I5,Q9BXJ9,Q17RB6,Q96L91,A8MSW4,Q8TE92,P55201,Q16594,Q4VBQ6,Q92794,O75478,Q53NU6,Q9H8E8,Q92793,Q5TG36,Q5TG38,A4D265,A8K1P3,Q9UNL4,Q8WYB5,Q58F05,…	1611	60	13528	4.47854	2.22668e-10	7.67819e-12	1.10334e-10
GOTERM_CC_FAT	GO:0000123~histone acetyltransferase complex	28	1.47213	1.53928e-13	A4KYM4,Q76L81,Q69YR9,Q59EJ8,A4KYM6,Q9NSJ7,Q1KLZ0,Q9UE89,P60709,Q8TCM6,A8K001,Q9HAF1,Q562S0,O95696,Q5GRH6,Q659H0,Q38HM2,Q75MY6,Q59G93,Q5CZ83,A0JNS3,Q0EF63,Q0EF62,Q9Y265,Q8WYH8,Q68DJ2,Q9Y4A5,Q561W3,Q0VAE4,Q8TBS8,Q59FH1,O75528,Q53G99,Q7Z6E0,Q9NPF5,O95251,Q86X06,Q96HG5,Q96IW5,Q92831,Q9H2F5,Q17RB6,Q96L91,A8MSW4,Q8TE92,P55201,Q16594,Q4VBQ6,Q9UPT9,Q92794,O75478,Q53NU6,Q5TG36,Q92793,Q5TG38,A4D265,A8K1P3,…	1438	50	12782	4.97769	1.00789e-10	2.8797e-12	2.29994e-10
GOTERM_BP_FAT	GO:0016569~covalent chromatin modification	44	2.31335	4.87077e-11	A8K4Z1,A4KYM4,Q69YR9,Q59EJ8,A4KYM6,Q86UJ6,O75150,Q5H924,P51532,Q9HAF1,Q9H7Z6,A8K001,Q59G93,Q5CZ83,A0JNS3,Q0EF63,Q0EF62,Q8WYH8,Q9Y4A5,Q0VAE4,Q8TBS8,Q59FH1,Q7Z6E0,O95251,O95983,Q96IW5,A2A2I5,Q9UQL6,Q17RB6,Q96L91,Q16594,P55201,Q4VBQ6,Q9UPT9,Q8IWJ0,Q92794,O75478,Q92793,A4D265,A8K1P3,P35232,Q57Z54,Q9UIG0,Q8N4T7,P61088,Q6P1K4,Q9BT87,Q92993,Q9H0E9,A6NHB0,Q6IT96,Q6MZY4,Q6FHP5,A7E2E1,A8MZ91,Q92613,Q76L81,…	1611	126	13528	2.93238	1.81241e-07	3.41965e-09	8.98099e-08
GOTERM_BP_FAT	GO:0016570~histone modification	43	2.26078	5.94096e-11	A8K4Z1,A4KYM4,Q69YR9,Q59EJ8,A4KYM6,Q86UJ6,O75150,Q9HAF1,Q9H7Z6,A8K001,Q5H924,Q59G93,Q5CZ83,A0JNS3,Q0EF63,Q0EF62,Q8WYH8,Q9Y4A5,Q0VAE4,Q8TBS8,Q59FH1,Q7Z6E0,O95251,O95983,Q96IW5,A2A2I5,Q9UQL6,Q17RB6,Q96L91,Q16594,P55201,Q4VBQ6,Q9UPT9,Q8IWJ0,Q92794,O75478,Q92793,A4D265,A8K1P3,P35232,Q57Z54,Q9UIG0,Q8N4T7,P61088,Q6P1K4,Q9BT87,Q92993,Q9H0E9,A6NHB0,Q6IT96,Q6MZY4,Q6FHP5,A8MZ91,Q92613,Q76L81,O14744,Q9NSJ7,…	1611	122	13528	2.95969	2.21063e-07	4.01933e-09	1.09543e-07
GOTERM_MF_FAT	GO:0016407~acetyltransferase activity	31	1.62986	1.3245e-08	P24752,A8K4Z1,Q76L81,Q69YR9,Q59EJ8,Q9H0A0,Q59EE8,Q9NSJ7,Q53FI2,Q6ICU9,Q9H7Z6,Q9Y6Q9,Q5GRH6,Q05CW7,Q5T952,Q75MY6,Q38HM2,Q502X4,A0JNS3,Q6P4J0,Q71V38,Q68DJ2,Q2TM25,Q569F6,Q561W3,Q8TBS8,Q0IIN7,O75528,P10515,Q53TA2,O15228,Q0IIN2,O95251,Q147X3,Q92831,Q96IW5,Q9H2F5,A2A2I5,Q96FG8,Q01991,Q9BXJ9,Q9HAN0,Q9H2N9,Q16594,P21673,Q9UPT9,P43155,Q59EC9,Q53T69,Q92794,O75478,Q9H8E8,Q6PJJ3,Q53H08,Q92793,Q53EP3,Q4LE83,…	1596	82	12983	3.07532	1.67283e-05	6.97017e-07	2.15491e-05
GOTERM_BP_FAT	GO:0043967~histone H4 acetylation	13	0.683491	3.90085e-07	A4KYM4,Q4VBQ6,A4KYM6,Q5TG36,Q5TG38,A4D265,Q9HAF1,A8K001,Q5GRH6,Q9UNL4,Q0EF63,Q0EF62,Q9Y265,Q68DJ2,Q9Y4A5,Q5TG40,Q0VAE4,Q59FH1,Q9BT87,Q9NPF5,O95251,Q9NXR8,Q9H0E9,A6NHB0,Q9UBU8,Q9H2F5,Q92613,Q9NQC1,Q96L91,A8MSW4	1611	20	13528	5.45822	0.00145045	1.48112e-05	0.000719258
GOTERM_MF_FAT	GO:0008080~N-acetyltransferase activity	24	1.26183	4.15126e-06	A8K4Z1,Q76L81,Q69YR9,Q59EJ8,Q9H0A0,Q9NSJ7,Q59EE8,Q6ICU9,Q9H7Z6,Q9Y6Q9,Q05CW7,Q5GRH6,Q38HM2,Q75MY6,Q502X4,A0JNS3,Q6P4J0,Q68DJ2,Q2TM25,Q569F6,Q561W3,Q8TBS8,Q0IIN7,O75528,O95251,Q0IIN2,Q147X3,Q92831,Q96IW5,Q9H2F5,A2A2I5,Q9BXJ9,Q9H2N9,Q16594,P21673,Q9UPT9,Q92794,O75478,Q9H8E8,Q92793,Q8WYB5,Q58F05,Q2NLE2,Q9GZZ1,Q0VF45,A4LAZ5,Q96F10,Q09472,Q92993,Q4G0V0,Q9NXR8,Q4LE28,Q6MZY4,A8MVD0,O60869,Q7Z6C1,A5PKX7	1596	69	12983	2.82946	0.00522934	0.000169117	0.00675373
GOTERM_MF_FAT	GO:0004402~histone acetyltransferase activity	16	0.84122	1.99754e-05	A8K4Z1,Q76L81,Q9UPT9,Q69YR9,Q59EJ8,Q92794,Q9NSJ7,Q59EE8,O75478,Q92793,Q9H7Z6,Q9Y6Q9,Q5GRH6,Q75MY6,Q38HM2,Q8WYB5,A0JNS3,Q2NLE2,A4LAZ5,Q0VF45,Q68DJ2,Q569F6,Q8TBS8,Q561W3,Q09472,Q0IIN7,O75528,Q92993,O95251,Q9NXR8,Q4G0V0,Q96IW5,Q92831,Q4LE28,Q6MZY4,A8MVD0,Q9H2F5,O60869,Q7Z6C1,Q16594,A5PKX7	1596	38	12983	3.42514	0.0249136	0.000720573	0.0324942
GOTERM_MF_FAT	GO:0004468~lysine N-acetyltransferase activity	16	0.84122	1.99754e-05	A8K4Z1,Q76L81,Q9UPT9,Q69YR9,Q59EJ8,Q92794,Q9NSJ7,Q59EE8,O75478,Q92793,Q9H7Z6,Q9Y6Q9,Q5GRH6,Q75MY6,Q38HM2,Q8WYB5,A0JNS3,Q2NLE2,A4LAZ5,Q0VF45,Q68DJ2,Q569F6,Q8TBS8,Q561W3,Q09472,Q0IIN7,O75528,Q92993,O95251,Q9NXR8,Q4G0V0,Q96IW5,Q92831,Q4LE28,Q6MZY4,A8MVD0,Q9H2F5,O60869,Q7Z6C1,Q16594,A5PKX7	1596	38	12983	3.42514	0.0249136	0.000720573	0.0324942
GOTERM_MF_FAT	GO:0016410~N-acyltransferase activity	24	1.26183	0.000114749	A8K4Z1,Q76L81,Q69YR9,Q59EJ8,Q9H0A0,Q9NSJ7,Q59EE8,Q6ICU9,Q9H7Z6,Q9Y6Q9,Q05CW7,Q5GRH6,Q38HM2,Q75MY6,Q502X4,A0JNS3,Q6P4J0,Q68DJ2,Q2TM25,Q569F6,Q561W3,Q8TBS8,Q0IIN7,O75528,O95251,Q0IIN2,Q147X3,Q92831,Q96IW5,Q9H2F5,A2A2I5,Q9BXJ9,Q9H2N9,Q16594,P21673,Q9UPT9,Q92794,O75478,Q9H8E8,Q92793,Q8WYB5,Q58F05,Q2NLE2,Q9GZZ1,Q0VF45,A4LAZ5,Q96F10,Q09472,Q92993,Q4G0V0,Q9NXR8,Q4LE28,Q6MZY4,A8MVD0,O60869,Q7Z6C1,A5PKX7	1596	83	12983	2.35221	0.134922	0.00289452	0.186528
INTERPRO	IPR016181:Acyl-CoA N-acyltransferase	11	0.578339	0.00112291	A8K4Z1,Q96F10,Q2TM25,Q76L81,P21673,Q59EJ8,Q561W3,Q69YR9,Q92794,Q9H8E8,Q92993,Q6ICU9,Q0IIN2,O95251,Q147X3,Q9H7Z6,A2A2I5,Q8WYB5,Q502X4,Q9GZZ1,Q6P4J0,Q9H2N9,A5PKX7	1804	31	16659	3.27675	0.925382	0.0397415	1.94506
UP_SEQ_FEATURE	domain:N-acetyltransferase	8	0.42061	0.00687849	Q96F10,Q2TM25,P21673,Q9H0A0,Q9H8E8,Q6ICU9,Q0IIN2,Q147X3,Q92831,Q05CW7,A2A2I5,Q502X4,Q9GZZ1,Q6P4J0,Q9H2N9	1886	24	19113	3.37805	1	0.270414	12.1114
SP_PIR_KEYWORDS	Acyltransferase	26	1.36698	0.00789656	A8K4Z1,P24752,Q76L81,Q69YR9,Q59EJ8,Q9H0A0,Q59EE8,Q53FI2,Q6ICU9,Q9H7Z6,Q9Y6Q9,Q05CW7,Q5T952,Q502X4,Q9T2V8,Q86TQ8,Q6P4J0,P36957,Q71V38,Q9NYG2,Q6LEQ7,Q2TM25,Q86SW4,Q569F6,Q561W3,A6H8Z7,Q0IIN7,P10515,Q9NWU1,P11182,O15228,O95251,Q0IIN2,Q147X3,Q92831,Q16187,Q96FG8,Q01991,Q9HAN0,Q9H2N9,Q6IBS5,P21673,P43155,Q59EC9,Q92794,Q7LDY7,Q53H08,Q53EP3,Q8WYB5,P23786,Q86TW7,Q9BWD1,Q16791,Q9GZZ1,Q0VF45,A4LAZ5,Q96F10,…	1895	153	19235	1.7249	0.993437	0.0400405	11.1279
INTERPRO	IPR000182:GCN5-related N-acetyltransferase	7	0.368034	0.0319242	Q96F10,Q2TM25,P21673,Q9H0A0,Q9H8E8,Q6ICU9,Q0IIN2,Q147X3,Q05CW7,A2A2I5,Q502X4,Q9GZZ1,Q6P4J0,Q9H2N9	1804	23	16659	2.81049	1	0.481822	43.2898
Annotation Cluster 32	Enrichment Score: 7.220637611737137
Category	Term	Count	%	PValue	Genes	List Total	Pop Hits	Pop Total	Fold Enrichment	Bonferroni	Benjamini	FDR
SP_PIR_KEYWORDS	mRNA transport	30	1.57729	1.96419e-11	Q9H9X1,A8K4Z8,P12270,Q59G92,Q6IN92,Q59FQ9,P49792,P49790,A6NGM0,Q6P441,Q15010,Q2NL95,P42704,Q8N6V5,Q6DKH1,O00159,Q3MIB7,Q8WYP5,P63241,Q3KQZ0,Q9Y2N3,Q96KE7,A6NF01,Q96FV9,A6NFS9,Q32P51,Q5JUP7,A8MSG9,Q5T7X2,Q0VAC0,Q4VBX7,Q53QN7,Q86XD3,Q13838,Q5SRE5,Q75R47,A8K933,Q64I72,Q9UE33,Q64I73,Q5JC46,Q5JC45,Q9UKX7,P61326,Q96A72,Q6P486,Q5HYT6,Q09161,Q7Z743,Q96DI0,Q504U6,Q9HDC8,A8K1K5,Q5TBS2,Q92621,Q5STA2,Q58F23,…	1895	74	19235	4.11503	1.2453e-08	3.66265e-10	2.92285e-08
GOTERM_BP_FAT	GO:0006403~RNA localization	38	1.9979	7.5427e-11	Q6NSH4,Q9H9X1,A8K4Z8,A6NLH1,P12270,Q59G92,Q6IN92,P49792,Q59FQ9,P49790,O00148,Q6P441,Q96Q15,Q15010,Q6PJX3,P22626,Q2NL95,P42704,Q05D70,Q8N6V5,O00159,Q6DKH1,Q3MIB7,P63241,Q3KQZ0,Q9Y2N3,Q96KE7,A6NF01,Q2TA89,Q96FV9,A6NFS9,Q32P51,Q5JUP7,Q9NX34,Q5T7X2,Q0VAC0,Q4VBX7,Q59F99,Q53QN7,Q86XD3,Q13838,A8K933,Q5SRE5,Q75R47,Q64I72,Q9UE33,Q64I73,Q5JC46,Q5JC45,Q0VAX8,Q0VAX7,Q9UKX7,O43592,P61326,Q96A72,Q9BTI9,Q5HYT6,…	1611	100	13528	3.19096	2.80664e-07	4.92393e-09	1.39076e-07
GOTERM_BP_FAT	GO:0050658~RNA transport	37	1.94532	1.22819e-10	Q6NSH4,Q9H9X1,A8K4Z8,A6NLH1,P12270,Q59G92,Q6IN92,P49792,Q59FQ9,P49790,O00148,Q6P441,Q96Q15,Q15010,P22626,Q2NL95,P42704,Q8N6V5,Q05D70,O00159,Q6DKH1,Q3MIB7,P63241,Q3KQZ0,Q9Y2N3,Q96KE7,A6NF01,Q96FV9,Q2TA89,A6NFS9,Q32P51,Q5JUP7,Q9NX34,Q5T7X2,Q0VAC0,Q4VBX7,Q53QN7,Q86XD3,Q13838,A8K933,Q5SRE5,Q75R47,Q64I72,Q9UE33,Q64I73,Q5JC46,Q5JC45,Q0VAX8,Q9UKX7,Q0VAX7,O43592,P61326,Q96A72,Q9BTI9,Q5HYT6,Q6P486,Q09161,…	1611	97	13528	3.20308	4.57009e-07	7.61682e-09	2.2646e-07
GOTERM_BP_FAT	GO:0051236~establishment of RNA localization	37	1.94532	1.22819e-10	Q6NSH4,Q9H9X1,A8K4Z8,A6NLH1,P12270,Q59G92,Q6IN92,P49792,Q59FQ9,P49790,O00148,Q6P441,Q96Q15,Q15010,P22626,Q2NL95,P42704,Q8N6V5,Q05D70,O00159,Q6DKH1,Q3MIB7,P63241,Q3KQZ0,Q9Y2N3,Q96KE7,A6NF01,Q96FV9,Q2TA89,A6NFS9,Q32P51,Q5JUP7,Q9NX34,Q5T7X2,Q0VAC0,Q4VBX7,Q53QN7,Q86XD3,Q13838,A8K933,Q5SRE5,Q75R47,Q64I72,Q9UE33,Q64I73,Q5JC46,Q5JC45,Q0VAX8,Q9UKX7,Q0VAX7,O43592,P61326,Q96A72,Q9BTI9,Q5HYT6,Q6P486,Q09161,…	1611	97	13528	3.20308	4.57009e-07	7.61682e-09	2.2646e-07
GOTERM_BP_FAT	GO:0050657~nucleic acid transport	37	1.94532	1.22819e-10	Q6NSH4,Q9H9X1,A8K4Z8,A6NLH1,P12270,Q59G92,Q6IN92,P49792,Q59FQ9,P49790,O00148,Q6P441,Q96Q15,Q15010,P22626,Q2NL95,P42704,Q8N6V5,Q05D70,O00159,Q6DKH1,Q3MIB7,P63241,Q3KQZ0,Q9Y2N3,Q96KE7,A6NF01,Q96FV9,Q2TA89,A6NFS9,Q32P51,Q5JUP7,Q9NX34,Q5T7X2,Q0VAC0,Q4VBX7,Q53QN7,Q86XD3,Q13838,A8K933,Q5SRE5,Q75R47,Q64I72,Q9UE33,Q64I73,Q5JC46,Q5JC45,Q0VAX8,Q9UKX7,Q0VAX7,O43592,P61326,Q96A72,Q9BTI9,Q5HYT6,Q6P486,Q09161,…	1611	97	13528	3.20308	4.57009e-07	7.61682e-09	2.2646e-07
GOTERM_BP_FAT	GO:0015931~nucleobase, nucleoside, nucleotide and nucleic acid transport	39	2.05047	1.04235e-09	Q6NSH4,Q9H9X1,A8K4Z8,A6NLH1,P12270,Q59G92,Q6IN92,P49792,Q59FQ9,P49790,O00148,Q6P441,Q96Q15,Q15010,P22626,Q2NL95,P42704,Q8N6V5,Q05D70,O00159,Q6DKH1,Q3MIB7,P63241,Q3KQZ0,Q9Y2N3,Q96KE7,A6NF01,Q2TA89,Q96FV9,A6NFS9,Q32P51,Q5JUP7,Q9NX34,Q5T7X2,Q0VAC0,Q4VBX7,Q53QN7,Q86XD3,Q13838,P12235,A8K933,Q5SRE5,Q75R47,Q64I72,Q9UE33,Q64I73,Q5JC46,Q5JC45,Q0VAX8,Q9UKX7,Q0VAX7,Q59EP7,O43592,P61326,Q96A72,Q9BTI9,Q5HYT6,…	1611	113	13528	2.89817	3.87858e-06	5.54084e-08	1.92194e-06
GOTERM_BP_FAT	GO:0051028~mRNA transport	32	1.68244	7.41052e-09	Q9H9X1,A8K4Z8,P12270,Q59G92,Q6IN92,Q59FQ9,P49792,P49790,O00148,Q6P441,Q96Q15,Q15010,Q2NL95,P42704,Q8N6V5,Q6DKH1,O00159,Q3MIB7,P63241,Q3KQZ0,Q9Y2N3,Q96KE7,A6NF01,Q96FV9,A6NFS9,Q32P51,Q5JUP7,Q5T7X2,Q0VAC0,Q4VBX7,Q53QN7,Q86XD3,Q13838,Q5SRE5,Q75R47,A8K933,Q64I72,Q9UE33,Q64I73,Q5JC46,Q5JC45,Q9UKX7,P61326,Q96A72,Q6P486,Q5HYT6,Q09161,Q7Z743,Q96DI0,Q504U6,Q9HDC8,A8K1K5,Q5TBS2,Q92621,Q5STA2,Q58F23,Q5STA0,…	1611	87	13528	3.08865	2.75742e-05	3.5352e-07	1.36639e-05
GOTERM_CC_FAT	GO:0005635~nuclear envelope	53	2.78654	9.89819e-09	Q5T0M6,Q6FGI1,Q5T0M7,Q9H9X1,O14787,P37802,P43034,A6NLH1,Q96NH6,P84022,Q53R94,P12270,P61970,P15153,P49792,Q59FQ9,Q8WXH0,P49790,A6NGM0,Q9HB71,Q59F45,Q53HM8,Q15010,Q5R371,Q5R370,P06703,Q6PJX4,Q5I6Y6,Q5I6Y4,Q2NL95,Q5I6Y5,Q59EZ3,Q6UYC3,Q6FI35,Q96JJ2,Q03252,P02545,Q6MZP0,O00299,P42704,Q6NVY0,Q9BSK3,Q53SY1,Q8N6V5,O00159,Q6DKH1,Q59G12,Q8WYP5,P63241,Q3KQZ0,Q5CZA7,Q9Y2N3,Q96KE7,Q14974,A6NF01,Q05D48,P09874,…	1438	205	12782	2.29806	6.48329e-06	1.37943e-07	1.47943e-05
GOTERM_CC_FAT	GO:0005643~nuclear pore	27	1.41956	2.31961e-07	Q6P486,Q4LE60,P55060,Q7Z743,Q9H9X1,Q96DI0,O14787,A6NLH1,Q504U6,Q9HDC8,P12270,A8K1K5,Q92621,P61970,P49792,Q59FQ9,Q58F23,A8K3Z8,A6NGM0,P49790,Q8WUS7,P62826,A6NFQ0,Q15010,Q9H0U0,Q4LE56,Q2NL95,A6NL14,Q96JJ2,Q5T9I7,Q9BSK3,Q8N6V5,Q99968,O00159,Q6DKH1,Q15624,Q8WYP5,P63241,Q3KQZ0,Q9Y2N3,Q6IS14,Q96KE7,Q53G16,Q14974,A6NF01,Q05D48,Q9GZV4,Q4LE47,A6NFS9,Q6IN77,Q14739,Q5JUP7,Q86Y95,Q13073,Q9Y6D9,A8MSG9,P46060,…	1438	79	12782	3.03792	0.000151923	2.97911e-06	0.000346699
GOTERM_CC_FAT	GO:0046930~pore complex	30	1.57729	2.95864e-07	Q6P486,Q4LE60,P55060,Q7Z743,Q9H9X1,Q96DI0,O14787,A6NLH1,Q504U6,Q9HDC8,P21796,P12270,A8K1K5,Q92621,P61970,P49792,Q59FQ9,Q58F23,A8K3Z8,A6NGM0,P49790,Q5JSD2,Q8WUS7,Q5JSD1,P62826,A6NFQ0,Q15010,Q9H0U0,Q4LE56,Q2NL95,A6NL14,Q96JJ2,Q5T9I7,Q9BSK3,Q8N6V5,Q99968,O00159,Q6DKH1,Q15624,Q8WYP5,P63241,Q9Y277,Q3KQZ0,Q9Y2N3,Q6IS14,Q96KE7,Q53G16,Q14974,A6NF01,P45880,Q05D48,Q9GZV4,Q4LE47,A6NFS9,Q6IN77,Q14739,Q5JUP7,…	1438	95	12782	2.80697	0.000193772	3.72675e-06	0.000442211
SP_PIR_KEYWORDS	nuclear pore complex	16	0.84122	2.77568e-06	Q6P486,Q7Z743,Q9H9X1,Q96DI0,Q504U6,Q9HDC8,P12270,Q92621,P49792,Q59FQ9,Q58F23,A6NGM0,P49790,A6NFQ0,Q15010,Q9H0U0,Q4LE56,Q2NL95,Q5T9I7,Q8N6V5,Q99968,O00159,Q6DKH1,Q15624,Q8WYP5,P63241,Q3KQZ0,Q6IS14,Q9Y2N3,Q96KE7,Q53G16,A6NF01,Q9GZV4,Q4LE47,A6NFS9,Q5JUP7,Q86Y95,Q13073,A8MSG9,Q9UMR2,Q4VBX7,P52948,A6H8X3,Q86XD3,A8K9A0,Q5SRE5,Q75R47,A8K933,Q9UE33,Q5JC46,Q5JC45,Q9UKX7,Q96HA1,P35658,Q5SWY0	1895	40	19235	4.06016	0.00175824	2.70732e-05	0.00413031
GOTERM_BP_FAT	GO:0006913~nucleocytoplasmic transport	39	2.05047	1.06476e-05	Q01082,A8K4Z8,O14787,A6NLH1,Q96QC0,P12270,A6NDM5,Q5VXV2,Q59G92,Q6IN92,Q5VXV3,P61970,P49792,O00148,Q6P441,Q9HAV4,Q96Q15,Q2XSC7,Q15010,Q96QB7,Q01105,Q2F839,Q2NL95,Q53GA5,Q3KPI8,Q6DKH1,O15117,Q3MIB7,P63241,Q3KQZ0,Q96KE7,Q14974,Q19RW5,P39687,Q05D48,Q7M4N6,Q96FV9,Q53FK4,Q9BQG0,Q5JUP7,Q5J8L8,Q05DE9,Q2L6I0,Q5U0E4,Q9NX34,Q5T7X2,Q0VAC0,Q4VBX7,Q86XD3,Q6PKH8,Q13838,Q75R47,Q64I72,Q64I73,Q9UE33,Q5JC46,Q5JC45,…	1611	156	13528	2.09932	0.0388453	0.000295627	0.0196308
GOTERM_BP_FAT	GO:0051169~nuclear transport	39	2.05047	1.45608e-05	Q01082,A8K4Z8,O14787,A6NLH1,Q96QC0,P12270,A6NDM5,Q5VXV2,Q59G92,Q6IN92,Q5VXV3,P61970,P49792,O00148,Q6P441,Q9HAV4,Q96Q15,Q2XSC7,Q15010,Q96QB7,Q01105,Q2F839,Q2NL95,Q53GA5,Q3KPI8,Q6DKH1,O15117,Q3MIB7,P63241,Q3KQZ0,Q96KE7,Q14974,Q19RW5,P39687,Q05D48,Q7M4N6,Q96FV9,Q53FK4,Q9BQG0,Q5JUP7,Q5J8L8,Q05DE9,Q2L6I0,Q5U0E4,Q9NX34,Q5T7X2,Q0VAC0,Q4VBX7,Q86XD3,Q6PKH8,Q13838,Q75R47,Q64I72,Q64I73,Q9UE33,Q5JC46,Q5JC45,…	1611	158	13528	2.07274	0.0527395	0.000389717	0.0268446
GOTERM_BP_FAT	GO:0051168~nuclear export	20	1.05152	4.04331e-05	Q5HYT6,Q09161,A8K4Z8,A6NLH1,A8K1K5,Q59G92,Q6IN92,Q5STA2,A8K3Z8,Q5STA0,O00148,Q6P441,Q9HAV4,P62826,Q96Q15,A6NFQ0,P09651,Q15010,Q8N5M0,P52298,Q9H0U0,Q2F839,Q2NL95,P38646,P06748,A6NL14,Q9BYG9,A6NM50,Q8NI27,Q3MIB7,P63241,Q3KQZ0,Q6IS14,Q53G16,Q96KE7,P27797,Q8N1C8,Q96FV9,A8K3N7,Q69YT6,Q5JUP7,Q86U42,Q6IAT4,Q5HYU0,Q6I9Y2,Q9NX34,Q5T7X2,Q7KYK3,Q0VAC0,Q6IPF2,Q9UMR2,Q53G71,Q86XD3,A8K9A0,Q13838,Q75R47,Q64I72,…	1611	60	13528	2.79909	0.139683	0.000963987	0.0745264
GOTERM_BP_FAT	GO:0006405~RNA export from nucleus	15	0.788644	0.000167748	Q5HYT6,Q09161,A8K4Z8,A6NLH1,Q59G92,Q6IN92,Q5STA2,A8K3Z8,Q5STA0,O00148,Q6P441,P62826,Q96Q15,P09651,Q8N5M0,P52298,Q9H0U0,Q2NL95,P06748,Q9BYG9,A6NM50,Q8NI27,Q3MIB7,P63241,Q6IS14,Q53G16,Q96KE7,Q96FV9,A8K3N7,Q69YT6,Q86U42,Q5HYU0,Q6I9Y2,Q9NX34,Q5T7X2,Q7KYK3,Q0VAC0,Q6IPF2,Q9UMR2,Q13838,A8K9A0,Q64I72,Q64I73,Q5STU2,Q5STU3,Q5RJ65,Q3MI39,Q5STU1,Q5RJ61,O43592,Q9BSM5,Q9BTI9,Q5STB8,Q5STU9	1611	41	13528	3.07217	0.464334	0.00346202	0.308852
SP_PIR_KEYWORDS	translocation	18	0.946372	0.00070172	Q6P486,Q7Z743,Q9H9X1,Q96DI0,Q96DA6,Q504U6,Q9HDC8,P12270,Q92621,P49792,Q59FQ9,Q58F23,A6NGM0,P49790,A6NFQ0,Q15010,Q9H0U0,Q4LE56,Q2NL95,Q5T9I7,Q8N6V5,Q99968,O00159,Q6DKH1,Q15624,Q8WYP5,P63241,Q3KQZ0,Q6IS14,Q9Y2N3,Q96KE7,Q53G16,A6NF01,Q9GZV4,Q4LE47,A6NFS9,Q5JUP7,Q86Y95,O75381,Q13073,A8MSG9,Q9UMR2,Q4VBX7,P52948,A6H8X3,Q86XD3,A8K9A0,Q5SRE5,Q75R47,A8K933,Q9UE33,Q5JC46,Q5JC45,Q9UKX7,Q96HA1,P35658,Q5SWY0	1895	74	19235	2.46902	0.359206	0.00444058	1.03913
Annotation Cluster 33	Enrichment Score: 6.648695304479882
Category	Term	Count	%	PValue	Genes	List Total	Pop Hits	Pop Total	Fold Enrichment	Bonferroni	Benjamini	FDR
GOTERM_BP_FAT	GO:0007010~cytoskeleton organization	90	4.73186	1.67492e-07	P07437,Q596K9,Q8NF52,O60610,A2RUU9,Q6NSH4,Q8WVW5,P43034,A2A418,Q9UE82,P23528,Q9NQW6,O43491,Q9H7Z5,Q86TQ3,P07737,Q6LC01,Q9BSJ2,Q562R8,Q5HY53,Q9UJU1,P59998,Q6FGI9,P17661,Q59G27,Q6FI20,Q5HY55,Q5HY54,Q96SB3,Q5TBN4,Q05BW8,Q68DV2,Q13464,Q5TBN3,O75369,Q96CE4,P09493,Q9BV73,Q6FGZ2,Q8TCG4,Q6NR85,P13796,Q99439,Q96IL1,O75376,Q60FE6,P52566,Q60FE7,Q60FE2,Q9NZN4,Q4VBY4,O43264,Q5H9P1,Q60FE5,Q0P5N8,Q6IPL3,Q6NXF2,…	1611	436	13528	1.73338	0.000623045	6.92486e-06	0.000308831
GOTERM_BP_FAT	GO:0030029~actin filament-based process	58	3.04942	2.14843e-07	Q596K9,O60610,Q8NF52,Q8WVW5,P43034,Q9UE82,P23528,A2A418,Q9H7Z5,O43491,Q86TQ3,P07737,Q562R8,Q9UJU1,Q5HY53,P59998,Q6FI20,P14649,Q5HY55,Q5HY54,Q96SB3,Q5TBN4,Q68DV2,Q13464,Q5TBN3,O75369,P09493,Q6FGZ2,Q8TCG4,P13796,Q99439,Q96IL1,P52566,Q60FE6,Q60FE7,Q60FE2,Q9NZN4,Q0P5N8,Q60FE5,Q6NXF2,Q53GK7,Q562P0,Q8TES4,Q96B17,Q9UCI1,Q6FIA3,Q5T0S2,Q9UCI2,P63313,A4D0V4,Q8WUG4,Q96FU6,Q68CT4,P06396,Q86XU5,Q5T0R7,Q96C61,…	1611	241	13528	2.02092	0.000799112	8.68943e-06	0.000396138
GOTERM_BP_FAT	GO:0030036~actin cytoskeleton organization	55	2.89169	3.14628e-07	Q596K9,O60610,Q8NF52,Q8WVW5,P43034,Q9UE82,P23528,A2A418,Q9H7Z5,O43491,Q86TQ3,P07737,Q562R8,Q9UJU1,Q5HY53,P59998,Q5HY55,Q6FI20,Q5HY54,Q96SB3,Q5TBN4,Q68DV2,Q13464,Q5TBN3,O75369,P09493,Q6FGZ2,Q8TCG4,P13796,Q99439,Q96IL1,P52566,Q60FE6,Q60FE7,Q60FE2,Q9NZN4,Q0P5N8,Q60FE5,Q6NXF2,Q53GK7,Q562P0,Q8TES4,Q96B17,Q9UCI1,Q6FIA3,Q5T0S2,Q9UCI2,P63313,A4D0V4,Q8WUG4,Q96FU6,Q68CT4,P06396,Q86XU5,Q5T0R7,Q96C61,Q5T0R6,…	1611	226	13528	2.04358	0.00117005	1.24545e-05	0.000580127
Annotation Cluster 34	Enrichment Score: 6.242860657261708
Category	Term	Count	%	PValue	Genes	List Total	Pop Hits	Pop Total	Fold Enrichment	Bonferroni	Benjamini	FDR
UP_SEQ_FEATURE	domain:SAP	13	0.683491	3.91881e-07	Q68DW3,Q9NWH9,P12956,Q7Z627,Q7L4T5,Q9UEL2,Q96BA7,Q15424,Q9BWD2,Q69YJ6,A8K393,Q53H55,Q6IC76,Q00839,Q9BUJ2,A6ND53,Q9ULH7,Q6FG89,Q567R9,Q8N2W9,Q14151,Q5RI19,Q5RI18,Q13435,Q5RI17,P35659,Q9UKV3,Q1KMD3,Q05DS6,Q05BP1,Q7Z4Q5,P82979	1886	23	19113	5.728	0.00166332	8.3232e-05	0.000732971
SMART	SM00513:SAP	13	0.683491	4.43948e-07	Q68DW3,Q9NWH9,P12956,Q7Z627,Q7L4T5,Q9UEL2,Q96BA7,Q15424,Q9BWD2,Q69YJ6,A8K393,Q53H55,Q6IC76,Q00839,Q9BUJ2,A6ND53,Q9ULH7,Q6FG89,Q567R9,Q8N2W9,Q14151,Q5RI19,Q5RI18,Q13435,Q5RI17,P35659,Q9UKV3,Q1KMD3,Q05DS6,Q05BP1,Q7Z4Q5,P82979	909	23	9079	5.64533	0.000128737	1.6093e-05	0.00059018
INTERPRO	IPR003034:DNA-binding SAP	13	0.683491	1.07382e-06	Q68DW3,Q9NWH9,P12956,Q7Z627,Q7L4T5,Q9UEL2,Q96BA7,Q15424,Q9BWD2,Q69YJ6,A8K393,Q53H55,Q6IC76,Q00839,Q9BUJ2,A6ND53,Q9ULH7,Q6FG89,Q567R9,Q8N2W9,Q14151,Q5RI19,Q5RI18,Q13435,Q5RI17,P35659,Q9UKV3,Q1KMD3,Q05DS6,Q05BP1,Q7Z4Q5,P82979	1804	23	16659	5.21949	0.00247745	0.000112745	0.00187728
Annotation Cluster 35	Enrichment Score: 5.775822903107074
Category	Term	Count	%	PValue	Genes	List Total	Pop Hits	Pop Total	Fold Enrichment	Bonferroni	Benjamini	FDR
INTERPRO	IPR017998:Chaperone, tailless complex polypeptide 1	10	0.525762	8.97815e-08	P40227,Q2TU64,Q59H77,A8MWI8,Q99832,A6NCD2,Q96RI4,Q9UCR6,P48643,P50990,Q9H369,Q9HB74,P50991,A6NN54,Q6IBT3,Q53HV2,Q53SE2,A6NE14,Q9BU08,P78371,P17987,Q59ET3,A8JZY8,Q92526,Q5SZY0,A8K7E6,Q7Z759,P49368,Q53QD5,P10809,Q96GI1,Q53HU0	1804	11	16659	8.39498	0.000207374	1.15219e-05	0.00015696
INTERPRO	IPR002194:Chaperonin TCP-1, conserved site	9	0.473186	6.83169e-07	P40227,Q2TU64,Q59H77,A8MWI8,Q99832,A6NCD2,P48643,Q9H369,P50990,Q9HB74,P50991,A6NN54,Q6IBT3,Q53HV2,A6NE14,Q9BU08,P78371,P17987,Q59ET3,Q92526,A8JZY8,Q5SZY0,A8K7E6,Q7Z759,P49368,Q96GI1,Q53HU0	1804	10	16659	8.31103	0.00157688	7.51458e-05	0.00119434
PIR_SUPERFAMILY	PIRSF002584:molecular chaperone t-complex-type	9	0.473186	3.12657e-06	P40227,Q2TU64,Q59H77,A8MWI8,Q99832,A6NCD2,P48643,Q9H369,P50990,Q9HB74,P50991,A6NN54,Q6IBT3,Q53HV2,A6NE14,Q9BU08,P78371,P17987,Q59ET3,Q92526,A8JZY8,Q5SZY0,A8K7E6,Q7Z759,P49368,Q96GI1,Q53HU0	976	10	7396	6.82008	0.0027476	0.00137475	0.00485926
INTERPRO	IPR002423:Chaperonin Cpn60/TCP-1	10	0.525762	5.44153e-06	P40227,Q2TU64,Q59H77,A8MWI8,Q99832,A6NCD2,Q96RI4,Q9UCR6,P48643,P50990,Q9H369,Q9HB74,P50991,A6NN54,Q6IBT3,Q53HV2,Q53SE2,A6NE14,Q9BU08,P78371,P17987,Q59ET3,A8JZY8,Q92526,Q5SZY0,A8K7E6,Q7Z759,P49368,Q53QD5,P10809,Q96GI1,Q53HU0	1804	15	16659	6.15632	0.0124913	0.000448826	0.00951269
GOTERM_CC_FAT	GO:0005832~chaperonin-containing T-complex	7	0.368034	1.26585e-05	A6NE14,Q9BU08,P40227,Q2TU64,P17987,P78371,Q59ET3,Q59H77,A8JZY8,Q5SZY0,A8MWI8,A8K7E6,Q99832,A6NCD2,P49368,Q96GI1,P48643,Q9H369,P50991,Q9HB74,Q6IBT3,Q53HV2	1438	7	12782	8.88873	0.00825709	0.000125619	0.0189183
Annotation Cluster 36	Enrichment Score: 5.756123251931425
Category	Term	Count	%	PValue	Genes	List Total	Pop Hits	Pop Total	Fold Enrichment	Bonferroni	Benjamini	FDR
UP_SEQ_FEATURE	nucleotide phosphate-binding region:NAD	24	1.26183	6.1895e-07	Q5KTC1,P04406,Q75MT9,P00367,Q8N5H5,Q9H9C0,A8K828,Q0QET7,P12268,Q59EJ0,P21796,Q16768,Q4W5B4,A8MXQ4,Q59H27,Q5JSD2,Q5JSD1,A8K414,Q13423,Q6PKA6,O94759,Q8N3W6,P40925,P40926,P00352,Q5SYQ9,Q5SYQ7,Q5SYQ8,Q8N3W7,O60701,Q9NQ83,Q2TB59,Q9NQ82,Q6FHZ0,Q9NQ81,P49189,Q53X65,Q9BUT1,Q75MP7,Q16836,Q9Y277,P51659,P23368,Q5SYR1,Q0QF37,Q2TSD0,Q9NY20,Q53GW3,P45880,Q546H9,P09622,Q5T246,P30838,Q5T250,Q5ZEY3,Q8N9T9,Q14400,…	1886	76	19113	3.20026	0.00262585	0.000125197	0.00115768
SP_PIR_KEYWORDS	nad	42	2.2082	9.54896e-07	Q5KTC1,Q9NUZ0,P00367,Q75MT9,P04406,Q8N5H5,Q9H9C0,Q5H9R2,P12268,Q59EJ0,P23526,A8K6Y3,Q4W5B4,Q59H27,P15559,Q8N3W6,O94759,P00352,P13995,Q8N3W7,Q6TGM4,Q53TA2,O60701,O43837,Q6FHZ0,Q53X65,Q9BUT1,Q16836,Q9P1A0,P51659,P23368,Q5SYR1,Q53T69,Q2TSD0,A4D0W4,P45880,P53004,P09874,P11766,P09622,Q5T246,Q4LE83,Q6IRT1,Q3B792,Q5T250,Q5ZEY3,A8K747,Q13587,Q6TGM5,Q14DR2,P51649,P00338,P49327,P07195,Q49A26,Q9UBA4,Q9UDR5,…	1895	189	19235	2.25564	0.000605221	9.76454e-06	0.00142094
INTERPRO	IPR016040:NAD(P)-binding domain	38	1.9979	1.12521e-06	P00367,Q75MT9,P04406,Q8N5H5,Q9H9C0,P53597,P23526,A8K6Y3,Q8TBJ0,Q4W5B4,Q6IAL5,Q13564,Q08257,Q59H27,P53396,Q2Q9B7,Q712V1,P13995,Q0PHS1,O60701,Q53TA2,Q0PHS4,P48163,Q8WVW0,Q6FHZ0,Q53X65,Q9BUT1,Q16836,P51659,Q6TCH8,P23368,Q53T69,Q2TSD0,Q4VXZ8,A8MWG9,P53004,Q6UB35,Q5T246,Q4LE83,Q8NAS5,A6NDK3,Q5T250,Q5ZEY3,A8K747,Q9NUI1,Q13587,Q2TBF3,Q16798,P00338,P49327,P07195,Q8N9C4,Q13630,Q49A26,Q9UBA4,Q9UQV0,P40939,…	1804	150	16659	2.3394	0.00259587	0.000113004	0.00196713
UP_SEQ_FEATURE	binding site:NAD	17	0.893796	1.42122e-05	P04406,Q75MT9,P00367,Q0QET7,Q59EJ0,Q16768,Q8TBJ0,Q4W5B4,Q7LDK6,A8MXQ4,Q59H27,A8K414,Q8N3W6,P40925,P40926,Q5SYQ9,P00352,Q5SYQ7,Q5SYQ8,Q8N3W7,O60701,Q9NQ83,Q9NQ82,Q6FHZ0,Q9NQ81,Q53X65,Q9BUT1,Q75MP7,Q16836,P51659,Q6TCH8,P23368,Q16698,Q5SYR1,Q0QF37,Q2TSD0,Q9NY20,Q53GW3,Q546H9,P09622,Q8NAS5,Q5ZEY3,Q14400,Q9UDE9,Q16798,P51649,P00338,P07195,Q9BWL6,Q49A26,Q9UBA4,Q9UQV0,Q5U077	1886	50	19113	3.44561	0.0585875	0.00231938	0.0265791
Annotation Cluster 37	Enrichment Score: 5.724654921962924
Category	Term	Count	%	PValue	Genes	List Total	Pop Hits	Pop Total	Fold Enrichment	Bonferroni	Benjamini	FDR
SMART	SM00088:PINT	11	0.578339	9.63412e-07	Q53XU2,P60228,O43242,Q7L2H7,A8K7Z0,A8K7X4,Q9Y6E3,Q3B770,Q9BT78,A6NP15,Q6P1R0,Q6FG33,Q13098,Q53FT5,Q3B7B9,A8K3I7,Q7Z5T5,Q53FV3,Q05BS0,Q14152,Q8N9M2,Q6IBN0,Q24JU4,Q53GN6,Q9UNM7,Q9UNM6,Q8WVK4,Q99613,O00231,Q6IAX5,Q96N86,O00232	909	17	9079	6.46276	0.000279351	3.10428e-05	0.00128074
INTERPRO	IPR000717:Proteasome component region PCI	11	0.578339	2.04311e-06	Q53XU2,P60228,O43242,Q7L2H7,A8K7Z0,A8K7X4,Q9Y6E3,Q3B770,Q9BT78,A6NP15,Q6P1R0,Q6FG33,Q13098,Q53FT5,Q3B7B9,A8K3I7,Q7Z5T5,Q53FV3,Q05BS0,Q14152,Q8N9M2,Q6IBN0,Q24JU4,Q53GN6,Q9UNM7,Q9UNM6,Q8WVK4,Q99613,O00231,Q6IAX5,Q96N86,O00232	1804	17	16659	5.97525	0.00470847	0.000188766	0.0035718
UP_SEQ_FEATURE	domain:PCI	11	0.578339	3.40354e-06	Q53XU2,P60228,O43242,Q7L2H7,A8K7Z0,A8K7X4,Q9Y6E3,Q3B770,Q9BT78,A6NP15,Q6P1R0,Q6FG33,Q13098,Q53FT5,Q3B7B9,A8K3I7,Q7Z5T5,Q53FV3,Q05BS0,Q14152,Q8N9M2,Q6IBN0,Q24JU4,Q53GN6,Q9UNM7,Q9UNM6,Q8WVK4,Q99613,O00231,Q6IAX5,Q96N86,O00232	1886	19	19113	5.86714	0.0143543	0.000656978	0.0063658
Annotation Cluster 38	Enrichment Score: 5.666037422488649
Category	Term	Count	%	PValue	Genes	List Total	Pop Hits	Pop Total	Fold Enrichment	Bonferroni	Benjamini	FDR
GOTERM_CC_FAT	GO:0005938~cell cortex	43	2.26078	5.0593e-09	Q9UPN3,Q01082,Q8TAR2,Q96KP1,Q8NF52,Q96H99,Q68DU3,Q9UE89,Q1KLZ0,Q6PK16,Q8WVW5,P43034,Q96DE1,P23528,Q9UE82,Q9NQW6,Q562S0,Q14141,O43491,Q86TQ3,Q8IX26,Q6NT82,Q8IX27,Q96PK2,Q8IX28,Q562R8,Q5HY53,Q9UJU1,Q562Z7,Q562Z6,O43707,Q562Z4,Q5HY55,Q5HY54,Q9UJU6,Q86T83,P31146,Q96SB3,Q59FH4,Q68DV2,Q6IQ47,Q9UG16,Q53G99,P11277,O75369,A8K7C2,Q9UMG3,Q6FGZ2,Q59FP5,Q14917,Q5T2U1,Q96A65,Q60FE6,Q60FE7,Q60FE2,Q2PS10,Q60FE5,…	1438	146	12782	2.61791	3.31383e-06	7.36409e-08	7.56185e-06
GOTERM_CC_FAT	GO:0044448~cell cortex part	26	1.36698	2.52228e-06	Q8TAR2,Q01082,Q96KP1,Q68DU3,Q1KLZ0,Q9UE89,Q8WVW5,Q96DE1,P23528,Q562S0,Q9NQW6,Q14141,O43491,Q6NT82,Q562R8,Q9UJU1,Q562Z7,Q562Z6,O43707,Q562Z4,Q86T83,P31146,Q96SB3,Q68DV2,Q9UG16,Q53G99,P11277,A8K7C2,Q59FP5,Q14917,Q96A65,Q60FE2,Q2PS10,Q6PJ82,Q53GK6,Q59EY4,Q53QU3,Q562P0,Q96B17,Q562X9,Q5T0S2,A4D0V4,Q6NX51,Q53GC7,Q96FU6,Q8TC62,Q86XU5,P63261,Q15691,Q5T0R7,Q5T0R6,Q5T0R9,Q562Y6,Q5T0R3,Q6ZNL4,Q5T0R2,Q562Y8,…	1438	83	12782	2.78442	0.00165073	2.89837e-05	0.00376984
GOTERM_CC_FAT	GO:0030863~cortical cytoskeleton	19	0.998948	2.78977e-06	Q01082,Q9UJZ6,Q9UJZ7,Q68DU3,Q9UJZ8,Q1KLZ0,Q9UE89,Q9UJZ2,P60709,Q8WVW5,Q96DE1,Q5T0R1,P23528,Q562S0,O43491,Q562V5,Q562N8,Q32Q68,Q9UMJ0,P15311,Q59FD8,Q9UK20,Q562R8,Q6R5J7,Q9UJU1,Q53GE2,Q562N0,Q562Z7,O43707,Q562Z6,Q562Z4,Q562N2,Q86T83,Q99529,P31146,Q96SB3,Q68DV2,Q9UG16,Q53G99,Q13796,P11277,P35579,P60981,Q96HG5,Q13813,A8K7C2,Q562M5,P47755,P47756,Q59FP5,Q14917,Q14847,Q562M3,Q6PJ43,Q6NUR7,Q60FE2,Q71VG2,…	1438	49	12782	3.44665	0.00182563	3.15047e-05	0.00416963
GOTERM_CC_FAT	GO:0030864~cortical actin cytoskeleton	11	0.578339	0.000608694	Q01082,Q68DU3,Q71VG2,P23528,Q5T0R1,Q71VG0,Q71VG1,O43491,Q59FD8,Q8WYB3,Q6R5J7,Q96B17,Q96SB3,P31146,Q5T0S2,Q01518,Q68DV2,Q9UG16,Q13796,P11277,Q53RC4,P60981,Q13813,Q5T4F0,Q14917,Q59FP5,Q5T0R7,Q5T0R6,Q5T0R9,Q14847,Q5T0R3,Q5T0R2,Q5T0R5,Q5T0R4	1438	28	12782	3.492	0.328886	0.00516604	0.905931
Annotation Cluster 39	Enrichment Score: 5.627509681976363
Category	Term	Count	%	PValue	Genes	List Total	Pop Hits	Pop Total	Fold Enrichment	Bonferroni	Benjamini	FDR
GOTERM_BP_FAT	GO:0006511~ubiquitin-dependent protein catabolic process	67	3.52261	4.16347e-11	Q16531,P09936,Q8WW12,Q5JNW4,O75150,Q53FN2,Q05DH1,Q6MZI6,P61077,Q05CW6,A4D1L5,Q14139,A4D1L6,A0JNS3,A8K086,Q5T2B5,P28065,Q3MIH3,Q7Z5K8,Q5T2B7,Q8TBS8,Q53XP2,P68036,A8K7C4,P54578,Q5PY61,Q93009,Q96IW5,P40818,P14635,A6NJ42,Q53XY5,Q6NW36,A6NG77,A6NLF6,A4D0Q1,Q53GS9,Q6IB71,P62256,Q5TZP9,Q49A90,Q96N86,Q6U8A4,P35998,Q9UPT9,P43686,P62837,Q05DF5,Q05BX4,Q66K58,Q9UFQ0,O75477,A6NMY8,P62195,Q4W5I2,Q5M7Z1,P20618,…	1611	242	13528	2.32486	1.54923e-07	2.97928e-09	7.67683e-08
GOTERM_BP_FAT	GO:0010498~proteasomal protein catabolic process	37	1.94532	6.27842e-10	Q8WW12,Q5JNW4,Q53FN2,Q05DH1,Q6MZI6,Q05CW6,P28065,Q3MIH3,Q7Z5K8,Q53XP2,A8K7C4,Q5PY61,P14635,A6NJ42,Q6NW36,A6NLF6,A4D0Q1,Q6IB71,Q49A90,Q5TZP9,Q96N86,P43686,P35998,Q05BX4,O75477,Q9UFQ0,Q66K58,P62195,Q5M7Z1,P20618,Q4W5I2,P62979,Q7Z474,A8K6E5,Q8WYN9,Q8WYN8,Q5JXJ1,Q2M2R1,Q5U5U6,Q8N9M2,P62987,P62988,Q3LIA5,Q4KMX6,P49721,P49720,O43242,Q6MZZ1,Q99460,Q9Y6E3,Q75L23,Q5H9N4,Q53HB3,A6NP15,A8K763,P61289,Q69YV3,…	1611	102	13528	3.04607	2.3362e-06	3.43559e-08	1.15765e-06
GOTERM_BP_FAT	GO:0043161~proteasomal ubiquitin-dependent protein catabolic process	37	1.94532	6.27842e-10	Q8WW12,Q5JNW4,Q53FN2,Q05DH1,Q6MZI6,Q05CW6,P28065,Q3MIH3,Q7Z5K8,Q53XP2,A8K7C4,Q5PY61,P14635,A6NJ42,Q6NW36,A6NLF6,A4D0Q1,Q6IB71,Q49A90,Q5TZP9,Q96N86,P43686,P35998,Q05BX4,O75477,Q9UFQ0,Q66K58,P62195,Q5M7Z1,P20618,Q4W5I2,P62979,Q7Z474,A8K6E5,Q8WYN9,Q8WYN8,Q5JXJ1,Q2M2R1,Q5U5U6,Q8N9M2,P62987,P62988,Q3LIA5,Q4KMX6,P49721,P49720,O43242,Q6MZZ1,Q99460,Q9Y6E3,Q75L23,Q5H9N4,Q53HB3,A6NP15,A8K763,P61289,Q69YV3,…	1611	102	13528	3.04607	2.3362e-06	3.43559e-08	1.15765e-06
GOTERM_BP_FAT	GO:0044265~cellular macromolecule catabolic process	135	7.09779	7.84568e-08	A4QPB4,P04114,Q5JNW4,Q59GA5,Q5H924,Q9UKT8,P61077,A4D1L5,P61081,P49792,A4D1L6,Q13564,Q2HIX7,A8K086,Q96Q15,P28065,Q5T2B5,Q96GF2,Q5T2B7,Q59HB3,Q8TBS8,Q5T4S7,Q4ZG63,P54578,P14635,Q9UQL0,A6NJ42,Q53XY5,Q6NW36,Q04206,P62256,Q6NR85,Q5TZP9,Q49A90,A8K9T1,Q13789,Q6U8A4,P35998,P43686,Q1L6K4,Q8IWJ0,P62837,P55854,P22681,Q1L6K6,Q05BX4,O75477,Q60FE2,Q4W5I2,Q5M7Z1,P62979,Q7Z6F4,Q7Z474,P01106,A8K6E5,A8K1Z8,Q659F9,…	1611	725	13528	1.56363	0.000291895	3.47544e-06	0.000144663
GOTERM_BP_FAT	GO:0009057~macromolecule catabolic process	143	7.5184	8.94761e-08	A4QPB4,P04114,Q5JNW4,Q59GA5,Q5H924,Q9UKT8,P61077,A4D1L5,P61081,P49792,A4D1L6,Q13564,Q2HIX7,A8K086,Q96Q15,P28065,Q5T2B5,Q96GF2,Q5T2B7,Q59HB3,Q8TBS8,Q5T8D2,Q5T4S7,Q4ZG63,P54578,Q9NQ51,Q5T8D9,P14635,Q9UQL0,A6NJ42,Q53XY5,Q1JUQ5,Q6NW36,Q1JUQ3,Q04206,Q6NR85,P62256,Q5TZP9,Q49A90,A8K9T1,Q13789,Q6U8A4,P35998,P43686,Q1L6K4,Q8IWJ0,P62837,P55854,P22681,Q1L6K6,Q05BX4,O75477,Q60FE2,Q4W5I2,Q5M7Z1,P62979,Q7Z6F4,…	1611	781	13528	1.53753	0.000332885	3.91694e-06	0.000164981
GOTERM_BP_FAT	GO:0030163~protein catabolic process	109	5.73081	2.69743e-05	Q5JNW4,Q59GA5,Q9UKT8,Q5H924,P61077,A4D1L5,P61081,P49792,A4D1L6,Q13564,Q2HIX7,A8K086,Q5T2B5,P28065,Q5T2B7,Q8TBS8,Q5T8D2,Q5T4S7,P54578,Q9NQ51,Q5T8D9,P14635,Q9UQL0,A6NJ42,Q53XY5,Q6NW36,Q04206,P62256,Q5TZP9,Q49A90,Q6U8A4,P35998,P43686,P62837,Q8IWJ0,P55854,P22681,Q05BX4,O75477,Q60FE2,Q4W5I2,Q5M7Z1,P62979,Q7Z6F4,Q7Z474,Q59GS3,A8K6E5,Q4LE76,A8K1Z8,Q659F9,A3KMP8,P61088,A6NJA2,P51784,Q4VXH1,P61086,P62987,…	1611	622	13528	1.47155	0.0954998	0.000673415	0.049725
GOTERM_BP_FAT	GO:0051603~proteolysis involved in cellular protein catabolic process	105	5.5205	4.06806e-05	Q5JNW4,Q59GA5,Q9UKT8,Q5H924,P61077,A4D1L5,P61081,P49792,A4D1L6,Q13564,Q2HIX7,A8K086,Q5T2B5,P28065,Q5T2B7,Q8TBS8,Q5T4S7,P54578,P14635,Q9UQL0,A6NJ42,Q53XY5,Q6NW36,Q04206,P62256,Q5TZP9,Q49A90,Q6U8A4,P35998,P43686,P62837,Q8IWJ0,P55854,P22681,Q05BX4,O75477,Q60FE2,Q4W5I2,Q5M7Z1,P62979,Q7Z6F4,Q7Z474,A8K6E5,A8K1Z8,Q659F9,A3KMP8,P61088,A6NJA2,P51784,Q4VXH1,P61086,P62987,P62988,Q86XU5,Q96K76,Q6ZNL4,Q15369,…	1611	600	13528	1.46952	0.140475	0.00096371	0.0749824
GOTERM_BP_FAT	GO:0044257~cellular protein catabolic process	105	5.5205	5.02636e-05	Q5JNW4,Q59GA5,Q9UKT8,Q5H924,P61077,A4D1L5,P61081,P49792,A4D1L6,Q13564,Q2HIX7,A8K086,Q5T2B5,P28065,Q5T2B7,Q8TBS8,Q5T4S7,P54578,P14635,Q9UQL0,A6NJ42,Q53XY5,Q6NW36,Q04206,P62256,Q5TZP9,Q49A90,Q6U8A4,P35998,P43686,P62837,Q8IWJ0,P55854,P22681,Q05BX4,O75477,Q60FE2,Q4W5I2,Q5M7Z1,P62979,Q7Z6F4,Q7Z474,A8K6E5,A8K1Z8,Q659F9,A3KMP8,P61088,A6NJA2,P51784,Q4VXH1,P61086,P62987,P62988,Q86XU5,Q96K76,Q6ZNL4,Q15369,…	1611	603	13528	1.46221	0.170586	0.00118307	0.0926381
GOTERM_BP_FAT	GO:0019941~modification-dependent protein catabolic process	100	5.25762	7.57677e-05	Q5JNW4,Q9UKT8,Q5H924,P61077,A4D1L5,P61081,P49792,A4D1L6,Q13564,Q2HIX7,A8K086,Q5T2B5,P28065,Q5T2B7,Q8TBS8,Q5T4S7,P54578,P14635,Q9UQL0,A6NJ42,Q53XY5,Q6NW36,P62256,Q49A90,Q5TZP9,Q6U8A4,P35998,P43686,P62837,Q8IWJ0,P55854,P22681,Q05BX4,O75477,Q4W5I2,Q5M7Z1,Q7Z6F4,P62979,Q7Z474,A8K6E5,A8K1Z8,Q659F9,A3KMP8,P61088,A6NJA2,P51784,Q4VXH1,P61086,P62987,P62988,Q96K76,Q15369,O75155,O43242,A6NJB1,Q9NSJ7,Q05CD9,…	1611	574	13528	1.46294	0.245683	0.00169701	0.139612
GOTERM_BP_FAT	GO:0043632~modification-dependent macromolecule catabolic process	100	5.25762	7.57677e-05	Q5JNW4,Q9UKT8,Q5H924,P61077,A4D1L5,P61081,P49792,A4D1L6,Q13564,Q2HIX7,A8K086,Q5T2B5,P28065,Q5T2B7,Q8TBS8,Q5T4S7,P54578,P14635,Q9UQL0,A6NJ42,Q53XY5,Q6NW36,P62256,Q49A90,Q5TZP9,Q6U8A4,P35998,P43686,P62837,Q8IWJ0,P55854,P22681,Q05BX4,O75477,Q4W5I2,Q5M7Z1,Q7Z6F4,P62979,Q7Z474,A8K6E5,A8K1Z8,Q659F9,A3KMP8,P61088,A6NJA2,P51784,Q4VXH1,P61086,P62987,P62988,Q96K76,Q15369,O75155,O43242,A6NJB1,Q9NSJ7,Q05CD9,…	1611	574	13528	1.46294	0.245683	0.00169701	0.139612
SP_PIR_KEYWORDS	ubl conjugation pathway	70	3.68034	0.00389328	Q16531,P09936,Q9UPN9,O75150,Q53FN2,Q9UKT8,Q5H924,P61077,A4D1L5,P61081,P49792,Q92466,A0JNS3,Q14139,A4D1L6,Q13564,Q9HB71,Q2HIX7,Q5T2B5,Q7Z5K8,Q5T2B7,Q5R371,Q8TBS8,Q712V1,P68036,Q5R370,Q5T4S7,Q8N2W9,P54578,Q969M7,Q93009,Q96IW5,A0M8W4,P40818,Q9UQL0,Q53XY5,Q6NVY0,A6NG77,A6NLF6,P62256,Q6U8A4,Q9UPT9,Q8IWJ0,P62837,Q05DF5,P55854,P22681,A6NMY8,Q4W5I2,Q7Z6F4,A4D1V0,Q8NEZ5,P61956,Q53H55,Q14258,P63279,A8K6E5,…	1895	509	19235	1.39593	0.915682	0.0210946	5.63949
GOTERM_BP_FAT	GO:0006508~proteolysis	135	7.09779	0.207738	P17655,Q7RU04,Q5JSM0,Q5JSM1,Q13867,Q5JNW4,Q59ES1,Q59GA5,Q5H924,Q9UKT8,Q9NQW7,P61077,A4D1L5,P61081,P49792,A4D1L6,Q13564,Q2HIX7,A8K086,P28065,Q5T2B5,Q5T2B7,Q5VZU8,Q96K48,Q8TBS8,Q5T8D2,Q5T4S7,Q5VZU9,Q49AK0,Q16740,P54578,Q9NQ51,Q5T8D9,P14635,Q9UQL0,Q96B43,A6NJ42,Q53XY5,Q6NW36,Q04206,P62256,Q5TZP9,Q49A90,Q6U8A4,P35998,P43686,Q8IWJ0,P62837,P55854,P22681,Q05BX4,O75477,Q60FE2,Q4W5I2,Q5M7Z1,P62979,Q7Z6F4,…	1611	1054	13528	1.07555	1	0.829999	98.6345
Annotation Cluster 40	Enrichment Score: 5.56224703870666
Category	Term	Count	%	PValue	Genes	List Total	Pop Hits	Pop Total	Fold Enrichment	Bonferroni	Benjamini	FDR
INTERPRO	IPR006195:Aminoacyl-tRNA synthetase, class II, conserved region	14	0.736067	4.20429e-10	P14868,Q96I59,A8K5X5,Q9H9M6,Q9NP81,Q8TEA8,Q68CR9,Q5JRF7,Q53R85,Q6IBR2,A8K3J2,Q0VGA5,A8MSK1,Q5M7Z9,Q9NVT8,Q9HB23,Q9Y285,Q53GX7,Q52NV4,P26639,P41250,Q53HA4,A6NHW7,Q6PI48,Q53T60,A8K8I1,Q75MN1,Q15046,O43776,P49590,P07814,O95363,P12081,Q3KQZ8,Q53GU6,Q9H5H1,P49591,Q496C9	1804	17	16659	7.60487	9.7119e-07	8.829e-08	7.35012e-07
INTERPRO	IPR002314:Aminoacyl-tRNA synthetase, class II (G, H, P and S), conserved region	8	0.42061	3.82527e-05	Q53GX7,Q52NV4,P26639,A8K5X5,Q9NP81,P41250,Q53HA4,Q8TEA8,A6NHW7,A8K8I1,Q75MN1,P49590,P07814,Q0VGA5,Q3KQZ8,Q9P2K8,P12081,Q5M7Z9,P49591,Q496C9	1804	11	16659	6.71598	0.0845737	0.00259561	0.066854
INTERPRO	IPR004154:Anticodon-binding	6	0.315457	0.0012791	Q53GX7,Q9UHN1,Q52NV4,P26639,A8K5X5,P41250,Q8TEA8,A8K8I1,Q75MN1,P07814,P49590,P12081,Q3KQZ8,Q5M7Z9,Q496C9	1804	9	16659	6.15632	0.948005	0.0438086	2.21276
Annotation Cluster 41	Enrichment Score: 5.502552917126051
Category	Term	Count	%	PValue	Genes	List Total	Pop Hits	Pop Total	Fold Enrichment	Bonferroni	Benjamini	FDR
GOTERM_BP_FAT	GO:0006260~DNA replication	51	2.68139	3.39667e-08	A4KYM4,A4KYM6,Q6PJY7,Q6VMB5,P49916,P35249,P49321,Q5VXV2,Q59GH7,Q09028,P35250,Q5VXV3,P35251,Q4ZG57,Q6NWZ5,Q13564,Q5U0C2,Q308M6,Q0EF63,Q0EF62,Q8WYH8,Q6FHQ0,Q59F49,Q6PK95,Q01105,A8K6H2,Q00577,Q9UHN1,Q92878,A8K7C6,O95251,Q3KNV1,Q6FI35,P23921,Q04837,A4D1U3,Q08945,P55209,Q9HAW4,Q75MT5,Q4VBQ6,Q75MV9,P11388,P11387,P54132,Q1RMC6,Q1RMC5,Q53T61,Q6FHX6,P20962,A8K1P3,Q0VGA3,P35232,P28340,Q96F82,A8K6E7,Q6IPL9,…	1611	190	13528	2.254	0.000126382	1.56037e-06	6.26296e-05
SP_PIR_KEYWORDS	dna replication	28	1.47213	4.70838e-08	Q6PJY7,Q9BVT2,Q16576,P49916,P35249,P49321,Q14756,Q9BWF4,Q59GH7,Q09028,P35250,P35251,Q6NWZ5,Q4ZG57,Q5U0C2,Q308M6,Q8NHX6,Q59F49,Q6FHQ0,Q14566,Q6PK95,A8K6H2,Q9UHN1,Q9P1N1,Q96S55,Q5JP00,O95251,Q9Y5B9,Q6FI35,Q53HJ4,P23921,Q04837,A4D1U3,Q08945,Q6FHF5,Q13415,Q7Z6A3,Q13112,Q7Z6A1,Q7Z6A2,Q75MT5,Q75MV9,A8K0Y9,P11387,P54132,Q53FG5,Q6NVK3,Q53T61,Q0VGA3,Q96DF0,Q96F82,P28340,A8K6E7,Q53HK8,P49736,P12004,A8KA78,…	1895	88	19235	3.22967	2.98507e-05	5.63229e-07	7.00637e-05
GOTERM_BP_FAT	GO:0006261~DNA-dependent DNA replication	19	0.998948	8.61746e-05	Q2NLC9,Q9BVT2,P35249,Q14756,Q9BWF4,P35251,Q4ZG57,Q6NWZ5,Q5U0C2,Q308M6,Q8NHX6,Q59F49,Q14566,Q6PK95,Q9UHN1,Q00577,Q5U0P9,P39748,Q53HJ4,A5D8W9,Q13415,Q2NLD4,Q9NYD7,A8K0Y9,P11387,P54132,Q53FG5,Q53T61,Q6FHX6,P28340,Q96F82,A8K6E7,Q56A79,Q53HK8,Q6IPL9,P49736,A8KA78,P27694,Q7Z6P5,P17096,Q3B7X0,Q9UGV6,Q14321,P25205,Q5T7C4,P33992,Q5W0E8,P33991,Q5T7C6,Q59GW1,P26583,P40938,Q5T6U9,Q5T6U8,Q5U071,P09429,Q5T7C0,…	1611	58	13528	2.75083	0.274337	0.00186262	0.158774
KEGG_PATHWAY	hsa03030:DNA replication	15	0.788644	0.000708735	Q75MV9,A8K0Y9,Q53FG5,Q05DR2,Q53T61,P35249,Q6FHX6,Q8N451,Q14756,Q9BWF4,P35250,P35251,P28340,Q4ZG57,Q5U0C2,A8K6E7,Q53HK8,P49736,Q308M6,Q8NHX6,P12004,Q59F49,Q14566,P27694,Q567R6,Q7Z6P5,P39748,P25205,Q53HJ4,Q6FI35,P33992,Q5W0E8,P33991,Q04837,A4D1U3,Q6FHF5,P40938,Q7Z6A3,Q7Z6A1,Q7Z6A2,Q75MT5,Q5TBB1	808	36	5085	2.62222	0.114176	0.00754866	0.862071
Annotation Cluster 42	Enrichment Score: 5.155917598212647
Category	Term	Count	%	PValue	Genes	List Total	Pop Hits	Pop Total	Fold Enrichment	Bonferroni	Benjamini	FDR
GOTERM_BP_FAT	GO:0043966~histone H3 acetylation	14	0.736067	2.12561e-06	A4KYM4,Q4VBQ6,Q76L81,Q69YR9,A4KYM6,Q92794,O75478,Q53NU6,Q9HAF1,Q8TCM6,A8K1P3,O95696,Q659H0,Q9UNL4,Q59G93,Q8WYB5,Q5CZ83,Q0EF63,Q0EF62,Q8WYH8,A6NJE2,Q57Z54,Q8N4T7,O75528,Q9ULD4,Q9BT87,Q7Z6E0,O95251,Q86X06,Q9Y4Q3,A8MVD0,Q17RB6,Q9NQC1,Q92613,Q8TE92,P55201,Q16594,A5PKX7	1611	26	13528	4.52161	0.0078782	7.06171e-05	0.00391924
GOTERM_CC_FAT	GO:0070776~MOZ/MORF histone acetyltransferase complex	7	0.368034	1.26585e-05	Q57Z54,Q76L81,Q69YR9,Q92794,Q53NU6,Q8N4T7,Q9ULD4,Q7Z6E0,Q86X06,Q9HAF1,Q8TCM6,O95696,A8K1P3,Q9Y4Q3,Q659H0,Q59G93,Q8WYB5,Q5CZ83,Q17RB6,Q8TE92,Q8WYH8,P55201,A5PKX7,A6NJE2	1438	7	12782	8.88873	0.00825709	0.000125619	0.0189183
GOTERM_CC_FAT	GO:0070775~H3 histone acetyltransferase complex	7	0.368034	1.26585e-05	Q57Z54,Q76L81,Q69YR9,Q92794,Q53NU6,Q8N4T7,Q9ULD4,Q7Z6E0,Q86X06,Q9HAF1,Q8TCM6,O95696,A8K1P3,Q9Y4Q3,Q659H0,Q59G93,Q8WYB5,Q5CZ83,Q17RB6,Q8TE92,Q8WYH8,P55201,A5PKX7,A6NJE2	1438	7	12782	8.88873	0.00825709	0.000125619	0.0189183
Annotation Cluster 43	Enrichment Score: 4.986722313063558
Category	Term	Count	%	PValue	Genes	List Total	Pop Hits	Pop Total	Fold Enrichment	Bonferroni	Benjamini	FDR
GOTERM_BP_FAT	GO:0046907~intracellular transport	138	7.25552	1.41108e-11	Q8TAR2,Q5VVD0,Q8NF52,O75351,A8K2Z6,Q8IXI2,Q2VPJ6,Q9H115,Q86TQ3,Q59ES5,Q6P441,Q96Q15,A6NJP3,P14649,Q96Q11,Q01105,Q9BZZ3,Q5VVC8,Q5VVC9,Q86U12,Q86TP8,Q3MNE1,O95782,Q2YDB7,Q3KQZ0,Q13596,P39687,Q9NP61,Q96FV9,Q9UPH5,P27348,Q2VIQ3,O75381,Q59EQ2,P63104,Q6NX51,Q8WUG4,Q0VAC0,Q4VBX7,Q96G65,Q86XD3,Q6PKH8,Q64I72,Q64I73,Q96C61,Q53HL9,Q6ZNL4,Q6FG91,Q59GR8,Q2XN98,Q9UFK5,P31946,Q504U6,Q9HDC8,A1XKG3,Q9H4N8,Q5STA2,…	1611	657	13528	1.76381	5.25064e-08	1.14144e-09	2.60183e-08
SP_PIR_KEYWORDS	protein transport	89	4.67928	1.08787e-08	Q13765,Q8TAR2,Q6PJY7,O75351,O00203,Q20WL3,Q9H9X1,O14787,Q96GX3,Q8IY97,Q4W4Y1,Q9H115,Q7Z451,Q96EL6,P49792,Q59FQ9,Q53F62,P49790,A6NGM0,Q9H6Z4,A6NM19,A8K1G0,A8K6G8,Q59ES5,Q308M8,A6NJP3,Q5JPE4,A8K6H2,A1YCA4,Q9BZZ3,Q9Y5X1,Q9Y5X3,Q53SX4,Q6FGZ2,Q53ET1,Q86TP8,Q92930,O95782,Q3MNE1,Q503A9,Q3KQZ0,Q9Y2N3,Q96KE7,Q13596,O95249,Q05BX6,P35606,Q6PIW8,Q9NP61,O43264,Q6PJ82,Q9BV84,Q53T70,Q5JPC4,O75381,Q8IVW1,A8MSG9,…	1895	485	19235	1.86265	6.89708e-06	1.4369e-07	1.61882e-05
GOTERM_BP_FAT	GO:0008104~protein localization	149	7.83386	6.09101e-06	Q8TAR2,Q13765,Q5VVD0,Q596K9,Q8NF52,O75351,A8K2Z6,Q96GX3,Q4W4Y1,Q9H115,Q86TQ3,Q59FQ9,Q59ES5,A8K6G8,Q5JPE4,A6NJP3,Q96Q11,Q9BZZ3,Q5VVC8,Q5VWG9,Q53SX4,Q5VVC9,O75369,Q9BV73,Q6FGZ2,Q86TP8,Q92930,Q3MNE1,O95782,Q3KQZ0,Q13789,Q13596,Q9NP61,P13667,Q6IPL3,P27348,Q9BV84,Q53T70,Q6ZP56,Q5JPC4,O75381,Q59EQ2,P63104,P27824,P63313,Q6NX51,Q8WUG4,Q9NP72,Q4VBX7,Q8NCR1,Q96G65,Q86XD3,Q96C61,Q53HL9,Q6ZNL4,Q6FG91,P61204,…	1611	882	13528	1.41859	0.0224098	0.000182763	0.0112303
GOTERM_BP_FAT	GO:0015031~protein transport	131	6.88749	1.00484e-05	Q8TAR2,Q13765,P04114,Q5VVD0,Q6PJY7,O75351,Q8WVW9,Q20WL3,A8K2Z6,O00203,Q9H9X1,O14787,Q96QC0,Q96GX3,Q8IY97,Q4VJB6,Q4W4Y1,Q9H115,Q96EL6,Q7Z451,P49792,Q59FQ9,Q53F62,Q53XZ5,P49790,A6NM19,Q9H6Z4,A8K1G0,Q59ES5,A8K6G8,Q2XSC7,Q308M8,Q5JPE4,A6NJP3,Q96Q11,Q96QB7,Q59HB3,Q2F831,A1YCA4,A8K6H2,Q9BZZ3,Q9Y5X1,Q5VVC8,Q53SX4,Q8WTW0,Q9Y5X3,Q4ZG63,Q2F839,Q5VVC9,Q6FI35,P62258,Q6FGZ2,Q53ET1,Q92930,Q86TP8,O95782,Q3MNE1,…	1611	762	13528	1.44362	0.0366999	0.00028322	0.0185262
GOTERM_BP_FAT	GO:0045184~establishment of protein localization	132	6.94006	1.02028e-05	Q13765,Q8TAR2,Q5VVD0,Q8NF52,O75351,A8K2Z6,Q96GX3,Q4W4Y1,Q9H115,Q86TQ3,Q59FQ9,A8K6G8,Q59ES5,A6NJP3,Q5JPE4,Q96Q11,Q9BZZ3,Q5VVC8,Q53SX4,Q5VVC9,Q6FGZ2,Q86TP8,Q92930,Q3MNE1,O95782,Q3KQZ0,Q13789,Q13596,Q9NP61,P13667,P27348,Q9BV84,Q53T70,Q6ZP56,Q5JPC4,O75381,Q59EQ2,P63104,P27824,Q6NX51,Q8WUG4,Q9NP72,Q4VBX7,Q8NCR1,Q96G65,Q86XD3,Q96C61,Q53HL9,Q6ZNL4,Q6FG91,P61204,Q7Z743,Q2XN98,Q9UFK5,P31946,Q59EW3,Q504U6,…	1611	769	13528	1.4414	0.0372532	0.000285409	0.0188108
GOTERM_BP_FAT	GO:0006886~intracellular protein transport	74	3.89064	1.14285e-05	Q8TAR2,Q5VVD0,Q8WVW9,A8K2Z6,O00203,Q20WL3,O14787,Q96QC0,Q8IY97,Q4VJB6,Q9H115,Q7Z451,Q96EL6,P49792,Q53XZ5,A6NM19,Q59ES5,Q2XSC7,A6NJP3,Q96Q11,Q96QB7,Q2F831,Q9BZZ3,Q5VVC8,Q9Y5X1,Q8WTW0,Q5VVC9,Q2F839,Q6FI35,P62258,Q53ET1,Q86TP8,O95782,Q3MNE1,Q503A9,Q8TAA5,Q3KQZ0,Q13596,O95249,Q19RW5,O95140,P35606,Q9NP61,Q659G3,Q6PJ82,P27348,O75381,Q59EQ2,P63104,Q9NX34,Q6NX51,Q8WUG4,Q4VBX7,Q96G65,Q86XD3,Q2TAB5,Q53HL9,…	1611	374	13528	1.66149	0.0416343	0.000314956	0.0210704
GOTERM_BP_FAT	GO:0070727~cellular macromolecule localization	80	4.2061	1.20143e-05	Q8TAR2,Q5VVD0,Q8NF52,Q8WVW9,A8K2Z6,O00203,Q20WL3,O14787,Q96QC0,Q8IY97,Q4VJB6,Q9H115,Q86TQ3,Q7Z451,Q96EL6,Q05DA0,P49792,Q53XZ5,Q5HY53,A6NM19,Q59ES5,Q2XSC7,Q5HY55,A6NJP3,Q5HY54,Q96Q11,Q96QB7,Q2F831,Q9BZZ3,Q6PJX3,Q5VVC8,Q9Y5X1,Q5VWG9,Q8WTW0,Q5VVC9,Q2F839,Q6FI35,P62258,Q53ET1,Q86TP8,O95782,Q3MNE1,Q503A9,Q8TAA5,Q3KQZ0,Q13596,O95249,Q19RW5,O95140,Q60FE6,P35606,Q9NP61,Q659G3,O43264,Q60FE5,Q6PJ82,P27348,…	1611	414	13528	1.62266	0.0437209	0.000328662	0.0221503
GOTERM_BP_FAT	GO:0034613~cellular protein localization	79	4.15352	1.66164e-05	Q8TAR2,Q5VVD0,Q8NF52,Q8WVW9,A8K2Z6,O00203,Q20WL3,O14787,Q96QC0,Q8IY97,Q4VJB6,Q9H115,Q86TQ3,Q7Z451,Q96EL6,Q05DA0,P49792,Q53XZ5,Q5HY53,A6NM19,Q59ES5,Q2XSC7,Q5HY55,A6NJP3,Q5HY54,Q96Q11,Q96QB7,Q2F831,Q9BZZ3,Q5VVC8,Q9Y5X1,Q5VWG9,Q8WTW0,Q5VVC9,Q2F839,Q6FI35,P62258,Q53ET1,Q86TP8,O95782,Q3MNE1,Q503A9,Q8TAA5,Q3KQZ0,Q13596,O95249,Q19RW5,O95140,Q60FE6,P35606,Q9NP61,Q659G3,O43264,Q60FE5,Q6PJ82,P27348,Q6NXF2,…	1611	411	13528	1.61407	0.0599576	0.000441547	0.0306339
GOTERM_BP_FAT	GO:0006605~protein targeting	42	2.2082	0.00144611	Q9UPN3,Q8TAR2,Q01082,Q5VVD0,Q8WVW9,O00203,A8K2Z6,O14787,Q96QC0,Q4VJB6,P12270,A6NDM5,Q4VY19,Q96PK2,P61970,P49792,Q53XZ5,Q9HAV4,Q2XSC7,Q96Q11,Q15010,Q16543,Q2F831,Q9HAV7,Q5VVC8,A8K9K2,Q8WTW0,Q2F839,Q5VVC9,Q53GA5,P62258,Q8N4H5,Q3MNE1,Q6DKH1,O15117,Q8TAA5,P63241,Q3KQZ0,Q96A65,Q14974,Q19RW5,O95140,Q05D48,Q659G3,Q6PJ82,P27348,Q6NVX0,Q5JUP7,O75381,Q59EQ2,Q05DE9,Q2L6I0,Q5U0E4,P63104,O94826,Q6LD62,Q6NX51,…	1611	215	13528	1.6404	0.995414	0.0239643	2.63305
GOTERM_BP_FAT	GO:0033365~protein localization in organelle	29	1.52471	0.00701598	Q6P486,Q9UPN3,Q01082,Q4LE60,P55060,Q8WVW9,A8K2Z6,Q2XN98,Q3LRW2,Q3LRW1,O14787,Q96DA6,Q96QC0,Q504U6,Q9HDC8,Q3LRW5,Q3LRW4,Q3LRW3,Q6P2S0,P12270,A8K1K5,A6NDM5,P49458,Q05DA0,Q92621,Q96PK2,P61970,P49792,Q58F23,A8K3Z8,Q0VGM1,P62826,Q2XSC7,Q58F28,Q96Q11,Q5T9Q9,Q2F831,Q9HAV7,P61011,Q13696,Q1MSW8,Q9Y2X3,Q9NW64,A8K1B3,Q5VWG9,Q8WTW0,Q8N3S0,Q53GA5,A6NL14,P04637,Q6IT77,Q8N4H5,Q99968,Q6DKH1,O15117,Q8TAA5,Q15624,…	1611	146	13528	1.66795	1	0.0896274	12.1747
SP_PIR_KEYWORDS	transport	184	9.67403	0.0630818	Q8TAR2,Q13765,O75351,O75964,Q5H9R2,P00167,Q96GX3,Q4W4Y1,Q4TZM4,Q9H115,Q5T952,Q59FQ9,Q4TWB7,Q59F44,Q59ES5,Q6P441,A8K6G8,Q9UDG5,Q5JPE4,Q8IZI0,A6NJP3,Q9BZZ3,Q8TAS0,Q53SX4,Q6FGZ2,Q92930,Q86TP8,Q3MNE1,O95782,Q9P1A0,Q3KQZ0,Q13789,Q13596,Q9NP61,Q96FV9,A8MV91,Q9GZL9,Q53T70,Q6ZP53,Q9BV84,P22307,Q5JPC4,O75381,Q5T331,P14927,Q6NX51,Q0VAC0,Q9NP72,Q4VBX7,P07108,Q8TC60,Q8NCR1,Q86XD3,Q64I72,P06576,Q64I73,Q53HL9,…	1895	1670	19235	1.11837	1	0.220312	62.077
Annotation Cluster 44	Enrichment Score: 4.882245249807892
Category	Term	Count	%	PValue	Genes	List Total	Pop Hits	Pop Total	Fold Enrichment	Bonferroni	Benjamini	FDR
UP_SEQ_FEATURE	site:Interaction with phosphoserine on interacting protein	7	0.368034	5.85641e-06	Q2F831,Q6LD62,P31947,A8K9K2,P31946,A8K1N0,Q4VJB6,P61981,Q53RR5,Q9H4N8,P27348,Q4VY19,P62258,Q53S41,Q53XZ5,Q04917,Q59EQ2,Q4VY20,P63104	1886	7	19113	10.1341	0.0245712	0.00103605	0.0109533
SMART	SM00101:14_3_3	7	0.368034	6.31297e-06	Q2F831,Q6LD62,P31947,A8K9K2,P31946,A8K1N0,Q4VJB6,P61981,Q53RR5,Q9H4N8,P27348,Q4VY19,P62258,Q53S41,Q53XZ5,Q04917,Q59EQ2,Q4VY20,P63104	909	7	9079	9.9879	0.00182909	0.00018306	0.00839208
INTERPRO	IPR000308:14-3-3 protein	7	0.368034	1.01345e-05	Q2F831,Q6LD62,P31947,A8K9K2,P31946,A8K1N0,Q4VJB6,P61981,Q53RR5,Q9H4N8,P27348,Q4VY19,P62258,Q53S41,Q53XZ5,Q04917,Q59EQ2,Q4VY20,P63104	1804	7	16659	9.23448	0.0231389	0.000780057	0.0177161
PIR_SUPERFAMILY	PIRSF000868:14-3-3 protein	7	0.368034	3.21775e-05	Q2F831,Q6LD62,P31947,A8K9K2,P31946,A8K1N0,Q4VJB6,P61981,Q53RR5,Q9H4N8,P27348,Q4VY19,P62258,Q53S41,Q53XZ5,Q04917,Q59EQ2,Q4VY20,P63104	976	7	7396	7.57787	0.0279195	0.00939449	0.0499992
PIR_SUPERFAMILY	PIRSF000868:14-3-3	7	0.368034	3.21775e-05	Q2F831,Q6LD62,P31947,A8K9K2,P31946,A8K1N0,Q4VJB6,P61981,Q53RR5,Q9H4N8,P27348,Q4VY19,P62258,Q53S41,Q53XZ5,Q04917,Q59EQ2,Q4VY20,P63104	976	7	7396	7.57787	0.0279195	0.00939449	0.0499992
Annotation Cluster 45	Enrichment Score: 4.609480099560796
Category	Term	Count	%	PValue	Genes	List Total	Pop Hits	Pop Total	Fold Enrichment	Bonferroni	Benjamini	FDR
GOTERM_CC_FAT	GO:0015630~microtubule cytoskeleton	108	5.67823	5.43575e-09	P07437,A2RUU9,Q4W4Y1,Q32Q12,Q05CI5,P59998,A7E2X7,Q59G27,Q2Q9B7,Q2YDC5,Q13464,Q99426,Q6FGY5,A8K0X6,Q32Q22,P14635,Q9BV73,Q9UPG3,P67775,Q86TP8,Q5TZP9,Q59F36,Q5T2U1,Q5TZP7,O75376,Q4VBY4,Q9UPH5,A8K5E3,Q5H9P1,Q6IPL3,Q05193,Q2VIQ3,Q53QU3,P01106,A4D177,Q5HYH5,Q6LCB2,Q8WUG4,Q7Z757,Q8TC62,Q6UR97,Q6UR98,A1L4L2,Q86VD2,A6NJQ0,Q6ZNL4,Q59EP1,Q86WG4,Q6I9T8,Q5SYX2,Q5SYX0,Q8NCY0,Q5H9N4,A6NHL2,Q96HX0,O75592,Q8NHX6,…	1438	549	12782	1.7486	3.56041e-06	7.74004e-08	8.12452e-06
GOTERM_CC_FAT	GO:0005874~microtubule	52	2.73396	0.000189053	P07437,Q9H6Z0,Q68DU3,P43034,Q9H7Z5,Q6LC01,Q9UQM3,Q9BSJ2,Q9BQE3,P59998,Q59G27,Q9UFW7,Q53G92,Q59GB8,Q2YDC5,Q05BW8,Q70W33,Q99426,Q6FGY5,Q59HB8,A7E2C4,Q96CE4,Q9UPG3,Q86TP8,Q7RTP8,Q59F36,Q7RTQ4,Q7RTQ3,Q7RTQ2,Q7RTQ1,Q7RTQ8,Q7RTQ7,O75376,Q7RTQ0,Q4VBY4,Q9UPH5,O43264,Q5H9P1,Q05193,Q2VIQ3,Q5SU16,Q7RTQ9,Q6LCB2,O95239,Q8WUG4,Q9BV28,Q7Z757,Q6ZTU8,Q6UR97,Q6UR98,A1L4L2,Q86VD2,A6NJQ0,Q17RV9,Q15813,Q5SYX2,Q5SYX0,…	1438	274	12782	1.68691	0.11648	0.00167213	0.282195
SP_PIR_KEYWORDS	microtubule	41	2.15563	0.000292878	P07437,Q92862,Q6IQ37,Q71U36,Q9H6Z0,Q68DU3,P43034,Q59GI5,Q9H7Z5,Q6LC01,Q9UQM3,Q9BSJ2,Q3ZCR3,Q9BQE3,Q8IZ29,P59998,Q59G27,Q9UFW7,Q53G92,Q2TA90,Q59GB8,Q96FJ2,Q2YDC5,Q70W33,Q05BW8,Q99426,P50570,Q6FGY5,Q53GA7,O60282,Q96CE4,Q8IWP6,Q6PKB2,Q7RTP8,Q59F36,Q9H2R7,Q7RTQ4,Q7RTQ3,Q7RTQ2,Q7RTQ1,Q7RTQ8,Q9UQ16,Q7RTQ7,Q8TDA3,Q7RTQ0,Q4VBY4,Q9UPH5,Q5H9P1,Q5T5Y3,Q05193,Q2VIQ3,Q5SU16,Q7RTQ9,Q59GZ5,Q59HG1,Q6FGD7,Q13509,…	1895	231	19235	1.80159	0.169487	0.00201657	0.434936
GOTERM_BP_FAT	GO:0007017~microtubule-based process	48	2.52366	0.00121213	Q9UPN3,P07437,Q92862,P09936,Q71U36,Q9H6Z0,Q6NSH4,A2RUU9,Q8IXI2,P43034,Q9H7Z5,Q6LC01,Q9UQM3,Q96PK2,Q9BSJ2,Q6PEK6,Q3ZCR3,Q9BQE3,Q8IZ29,P59998,Q6FGI9,Q59G27,P33552,Q9UQE7,Q9UFW7,Q53G92,Q2TA90,Q86T83,Q59GB8,Q96FJ2,Q2YDC5,Q05BW8,Q15154,Q53GA7,O60282,Q86VX4,Q96CE4,Q8IWP6,P42704,Q9BV73,Q14683,Q05D70,Q6PKB2,O60313,Q7RTP8,A6NFV0,Q7RTQ4,Q7RTQ3,Q7RTQ2,Q7RTQ1,Q7RTQ8,Q7RTQ7,Q86YY2,Q96N67,Q86YY1,O75376,P43487,…	1611	253	13528	1.59316	0.989035	0.0205828	2.21153
Annotation Cluster 46	Enrichment Score: 4.599804003326859
Category	Term	Count	%	PValue	Genes	List Total	Pop Hits	Pop Total	Fold Enrichment	Bonferroni	Benjamini	FDR
GOTERM_CC_FAT	GO:0000228~nuclear chromosome	39	2.05047	7.15623e-06	P52701,Q05BV8,Q32Q15,Q96QC0,Q05BV1,Q3SWU9,A7E2B5,Q7Z2X1,Q6TXQ4,Q09028,Q53T09,Q6NWZ5,Q7Z5K2,Q92922,A7E2X7,Q6IC76,Q9UQE7,Q6PK95,Q0VAE4,Q05BW5,Q00577,Q92878,P17987,Q86VX4,P42704,Q05D74,Q14683,Q6IPS5,A8K111,Q92889,P11388,P12956,P11387,P54132,P84243,Q0Z7V0,P49736,A4D177,P63279,Q2L6I0,A8KA78,P27694,Q2I0Y7,Q6FG89,Q9UNS1,Q3B7X0,Q6P712,Q53QN7,Q6IT96,Q9NRG0,Q6IEE0,Q32P42,Q05CR1,O95347,P26583,Q5U071,Q2NLC9,…	1438	162	12782	2.13988	0.00467638	7.68388e-05	0.0106955
GOTERM_CC_FAT	GO:0044454~nuclear chromosome part	32	1.68244	8.91932e-06	P52701,Q2NLC9,Q92769,Q13185,Q96QC0,Q3SWU9,A7E2B5,Q6TXQ4,Q9BWF4,Q5U065,Q09028,Q53T09,Q7Z5K2,Q92922,Q8NHX6,Q6IC76,Q86U63,Q9UQE7,Q58F28,Q0VAE4,Q05BW5,Q00577,Q92878,Q96ST3,P17987,Q5U0P9,Q5U5J2,Q86VX4,Q53HJ4,A8K156,A8K111,Q2NLD4,Q58EY4,Q15554,Q92889,A8K0Y9,P12956,P54132,P68400,P84243,Q13547,Q0Z7V0,Q5HYD4,Q17RS0,A8K3X5,Q56A79,P49736,A4D177,P63279,Q2L6I0,Q8NEV1,Q9P0M6,Q13263,P16104,Q2I0Y7,P27694,Q1L838,…	1438	122	12782	2.33147	0.00582515	9.27287e-05	0.0133304
GOTERM_CC_FAT	GO:0000790~nuclear chromatin	17	0.893796	0.000248641	P52701,Q92769,Q13185,Q96QC0,P68400,Q3SWU9,P84243,Q13547,Q6TXQ4,Q5HYD4,Q17RS0,Q5U065,Q09028,Q92922,A4D177,Q86U63,Q58F28,Q2L6I0,Q8NEV1,Q13263,Q9P0M6,P16104,Q2I0Y7,Q0VAE4,Q05BW5,Q1L838,Q96ST3,P17987,P46100,Q5U5J2,Q9UNS1,Q6IT96,Q9UBU8,Q9HA11,Q05CR1,Q58EY4	1438	55	12782	2.74743	0.150307	0.00216937	0.370986
Annotation Cluster 47	Enrichment Score: 4.526434932339516
Category	Term	Count	%	PValue	Genes	List Total	Pop Hits	Pop Total	Fold Enrichment	Bonferroni	Benjamini	FDR
GOTERM_CC_FAT	GO:0016585~chromatin remodeling complex	31	1.62986	2.40844e-11	Q86WG4,P51531,Q9UBB5,Q86UJ6,Q12873,Q92925,Q92769,Q16576,Q6LE77,Q9NWF5,P51532,Q96SY8,Q5U065,Q4W5G3,Q09028,Q9NTB1,Q5W9G6,Q92922,Q69YZ5,Q6FHQ0,Q68DB1,Q8NC65,Q6LE81,P06400,Q6LE80,Q7Z7J0,Q7KZ60,Q0VAE4,Q05BW5,Q96ST3,Q5U5J2,Q5JP00,Q5JRR2,O95983,P52732,A8K4B7,Q6LE82,Q92831,Q9UQL6,Q6LE79,Q4W5H1,Q4LE49,Q7KZ61,Q9HBD4,O14497,Q59HH0,Q58EY4,Q96T01,Q6DUF0,Q86YY2,O75376,Q86YY1,Q7Z5Q6,Q8NFD5,Q59FZ6,P68400,A8K5E3,…	1438	71	12782	3.881	1.57753e-08	4.04494e-10	3.59976e-08
GOTERM_CC_FAT	GO:0016581~NuRD complex	9	0.473186	1.91481e-05	Q2I0Y7,Q5JNZ9,Q12873,Q92769,Q5U5J2,Q5JP00,Q2TAZ1,Q14839,Q16576,P68400,O95983,A8K4B7,Q6IT96,Q13547,Q5HYD4,Q5U065,Q09028,O94776,Q05CG6,Q6FHQ0,Q68DB1,Q8NEV1	1438	13	12782	6.15374	0.0124638	0.000187178	0.0286157
GOTERM_CC_FAT	GO:0000118~histone deacetylase complex	16	0.84122	1.98959e-05	Q9UBB5,Q12873,Q92769,Q86YY2,O75376,Q86YY1,Q16576,P68400,Q13547,Q5HYD4,Q5U065,Q09028,Q5W9G6,Q9BZK7,Q69YZ5,Q05CG6,Q6FHQ0,Q8NEV1,Q68DB1,Q7Z516,Q2I0Y7,Q5JNZ9,Q0VAE4,Q96ST3,Q5U5J2,Q5JP00,Q2TAZ1,Q14839,O95983,O75446,A8K4B7,Q6IT96,Q9NSZ0,Q9UBU8,Q9UQL6,O94776	1438	41	12782	3.46877	0.0129474	0.000188851	0.0297333
GOTERM_CC_FAT	GO:0017053~transcriptional repressor complex	16	0.84122	1.98959e-05	Q12873,Q92769,Q86YY2,O75376,Q86YY1,Q16576,P31946,P68400,Q13547,Q5HYD4,Q5U065,Q4VY19,Q09028,Q05CG0,Q9BZK7,P29374,Q59GM0,Q59EQ2,Q05CG6,Q6FHQ0,Q8NEV1,Q68DB1,Q7Z516,Q2I0Y7,Q5JNZ9,Q9BT61,Q9Y618,Q56D06,Q8TAQ2,Q5U5J2,A8MYU0,Q5JP00,Q2TAZ1,Q14839,A8K9K2,O95983,A8K4B7,Q6IT96,Q9NSZ0,P41162,O94776,Q4VY20	1438	41	12782	3.46877	0.0129474	0.000188851	0.0297333
GOTERM_CC_FAT	GO:0016580~Sin3 complex	6	0.315457	0.000745474	Q2I0Y7,Q0VAE4,Q92769,Q96ST3,Q5U5J2,P68400,Q6IT96,Q13547,Q5HYD4,Q5U065,Q9UBU8,Q09028,Q8NEV1	1438	8	12782	6.66655	0.386434	0.00608724	1.10845
GOTERM_CC_FAT	GO:0070822~Sin3-type complex	6	0.315457	0.000745474	Q2I0Y7,Q0VAE4,Q92769,Q96ST3,Q5U5J2,P68400,Q6IT96,Q13547,Q5HYD4,Q5U065,Q9UBU8,Q09028,Q8NEV1	1438	8	12782	6.66655	0.386434	0.00608724	1.10845
BIOCARTA	h_prc2Pathway:The PRC2 Complex Sets Long-term Gene Silencing Through Modification of Histone Tails	5	0.262881	0.203564	Q13547,Q6IT96,Q5HYD4,Q5JNZ9,Q09028,Q92769,Q5JP00,Q16576,O00257,Q6FHQ0	265	13	1437	2.08563	1	0.818602	94.7021
Annotation Cluster 48	Enrichment Score: 4.300123373391361
Category	Term	Count	%	PValue	Genes	List Total	Pop Hits	Pop Total	Fold Enrichment	Bonferroni	Benjamini	FDR
SP_PIR_KEYWORDS	gtp-binding	62	3.25973	9.03866e-07	Q96CD8,P07437,P00367,Q9H8Z6,Q9H6Z0,Q8IXI2,Q5T3R7,Q5T3R8,Q9NY44,Q6NSH7,Q96GX3,Q6NT82,Q6LC01,Q9UQM3,Q6IAL5,Q9BQE3,A8K6G8,Q96GF2,Q53HM9,Q9H2I7,Q53G92,P68104,Q96QB7,Q9HC01,Q2F837,Q53SX4,Q53SI8,Q7Z3R6,Q59GP5,Q9BUV3,Q6FGZ2,Q92930,O60313,Q8TD98,Q96RE1,O95140,Q9UPH5,Q05193,Q53T70,Q53QU3,Q5SU16,Q5JPC4,Q8IVW1,Q5VTE0,Q9BV28,Q9NP72,Q8TC62,Q6ZTU8,Q6UR97,Q6UR98,Q86VD2,A6NJQ0,Q56UN9,Q9NVN8,Q5VV70,P61204,Q5SYX2,…	1895	329	19235	1.91284	0.000572887	9.39424e-06	0.001345
UP_SEQ_FEATURE	nucleotide phosphate-binding region:GTP	52	2.73396	5.08878e-05	Q96CD8,P07437,Q9UHD8,Q71U36,Q9H8Z6,Q9BVP2,Q9H6Z0,Q5T3R7,Q6NSH7,Q9NY44,Q5T3R8,Q96GX3,Q59GI5,Q14141,Q6LC01,Q05CQ1,Q6NT82,Q9UQM3,P15153,Q6PEK6,Q3ZCR3,Q9BQE3,Q8IZ29,A8K6G8,Q53HM9,Q96GF2,Q9H2I7,Q05639,P68104,Q53G92,Q6IPS9,Q2F837,Q9HC01,P49411,Q9NVY0,P50570,Q8TA90,Q53GA1,Q53SX4,Q53SI8,Q53GA7,Q53GS0,Q9UJM1,Q8IWP6,A8K4X9,Q59GP5,Q9NZS6,Q8N5A0,Q6P082,Q6FGZ2,Q92930,O60313,Q6IPT9,Q96RE1,P60953,Q9UQ16,P61026,…	1886	295	19113	1.78636	0.194407	0.00673276	0.0951377
GOTERM_MF_FAT	GO:0005525~GTP binding	72	3.78549	8.93521e-05	Q96CD8,P07437,P00367,Q9H8Z6,Q9H6Z0,Q8IXI2,Q5T3R7,A8K9B9,Q5T3R8,Q9NY44,Q6NSH7,Q96GX3,Q32Q12,Q53SW9,Q6NT82,Q6LC01,Q9UQM3,Q6IAL5,Q4W4X9,Q9BQE3,A8K6G8,Q96GF2,Q53HM9,Q9H2I7,P68104,Q53G92,Q96QB7,Q2F837,Q9HC01,Q53SX4,Q53SI8,Q4ZG60,Q7Z3R6,Q59GP5,Q9BUV3,Q6FGZ2,Q92930,O60313,Q96FC3,Q8TD98,Q96RE1,Q6FGK3,O95140,Q9NZN4,Q9UPH5,Q05193,Q53T70,Q53QU3,Q5SU16,Q5JPC4,Q8IVW1,Q5VTE0,Q9BV28,Q9NP72,Q8TC62,Q6ZTU8,Q6UR97,…	1596	372	12983	1.57446	0.106721	0.00234842	0.145273
GOTERM_MF_FAT	GO:0019001~guanyl nucleotide binding	73	3.83807	0.000119894	Q96CD8,P07437,P00367,Q9H8Z6,Q9H6Z0,Q8IXI2,Q5T3R7,A8K9B9,Q5T3R8,Q9NY44,Q6NSH7,Q96GX3,Q53SW9,Q32Q12,Q6NT82,Q6LC01,Q9UQM3,Q6IAL5,Q4W4X9,Q9BQE3,A8K6G8,Q96GF2,Q53HM9,Q9H2I7,P68104,Q53G92,Q96QB7,Q2F837,Q9HC01,Q53SX4,Q53SI8,Q4ZG60,Q7Z3R6,Q59GP5,Q9BUV3,Q6FGZ2,Q92930,O60313,Q96FC3,Q8TD98,Q96RE1,O95140,Q6FGK3,Q9NZN4,Q9UPH5,Q05193,Q53T70,Q53QU3,Q5SU16,Q5JPC4,Q8IVW1,Q5VTE0,Q9BV28,Q9NP72,Q8TC62,Q6ZTU8,Q6UR97,…	1596	382	12983	1.55454	0.140526	0.00296491	0.194884
GOTERM_MF_FAT	GO:0032561~guanyl ribonucleotide binding	73	3.83807	0.000119894	Q96CD8,P07437,P00367,Q9H8Z6,Q9H6Z0,Q8IXI2,Q5T3R7,A8K9B9,Q5T3R8,Q9NY44,Q6NSH7,Q96GX3,Q53SW9,Q32Q12,Q6NT82,Q6LC01,Q9UQM3,Q6IAL5,Q4W4X9,Q9BQE3,A8K6G8,Q96GF2,Q53HM9,Q9H2I7,P68104,Q53G92,Q96QB7,Q2F837,Q9HC01,Q53SX4,Q53SI8,Q4ZG60,Q7Z3R6,Q59GP5,Q9BUV3,Q6FGZ2,Q92930,O60313,Q96FC3,Q8TD98,Q96RE1,O95140,Q6FGK3,Q9NZN4,Q9UPH5,Q05193,Q53T70,Q53QU3,Q5SU16,Q5JPC4,Q8IVW1,Q5VTE0,Q9BV28,Q9NP72,Q8TC62,Q6ZTU8,Q6UR97,…	1596	382	12983	1.55454	0.140526	0.00296491	0.194884
GOTERM_MF_FAT	GO:0003924~GTPase activity	45	2.36593	0.000267819	Q96CD8,P07437,Q9UHD8,Q71U36,Q7Z5S8,Q9H8Z6,Q9H6Z0,Q5T3R7,A8K9B9,Q5T3R8,Q9NY44,Q6NSH7,Q59GI5,Q05CQ1,Q6LC01,Q9UQM3,P15153,Q6PEK6,Q3ZCR3,Q9BQE3,Q8IZ29,A8K6G8,Q96GF2,Q53HM9,Q9H2I7,Q05639,P68104,Q53G92,Q96QB7,P49411,Q2F837,Q6IPS9,Q9NVY0,P50570,Q8TA90,Q53GA1,Q53SI8,Q5T3S9,Q53GA7,Q53GS0,Q9UJM1,Q8IWP6,A8K4X9,Q59GP5,Q8N5A0,Q9NZS6,Q6FGZ2,Q6P082,Q92930,O60313,Q6IPT9,Q49AP2,Q8NCJ3,Q96RE1,P60953,Q9UQ16,O95140,…	1596	211	12983	1.73489	0.287019	0.00602288	0.434842
Annotation Cluster 49	Enrichment Score: 4.037272860150515
Category	Term	Count	%	PValue	Genes	List Total	Pop Hits	Pop Total	Fold Enrichment	Bonferroni	Benjamini	FDR
SP_PIR_KEYWORDS	elongation factor	11	0.578339	1.06438e-05	Q96CD8,Q96C29,Q9H8Z6,Q6NSH7,P29692,Q16577,Q53GE9,Q6PK56,Q53HR1,Q6IPN6,Q53YD7,Q53HM9,Q2F840,Q53HR5,Q9H2I7,P68104,Q05639,Q6IPS9,Q2F837,P49411,A6NCI9,Q2F838,Q8TA90,Q53GA1,Q4VBZ6,Q9NZS6,Q59GP5,Q6P082,Q6P4C9,Q96I38,P24534,P63241,Q6IPT9,Q6IS14,Q9BW34,Q96RE1,Q53G89,Q14222,Q9GZV4,Q53G85,A8K795,Q5JR01,Q7Z2Z2,Q8TBL1,Q6IQ15,Q5VTE0,Q96EB3,Q96RP9,A8K9A0,P26641,Q8IUB0,P13639,Q6NS35,Q9H7G6,Q53HQ7,Q504Z0,A6NKY5	1895	21	19235	5.31687	0.00672546	0.000100714	0.0158374
GOTERM_MF_FAT	GO:0003746~translation elongation factor activity	12	0.630915	5.02154e-05	Q96CD8,P23193,Q96C29,Q9H8Z6,Q6NSH7,P29692,Q16577,Q53GE9,A6NF25,Q6PK56,Q53HR1,Q6IPN6,Q53YD7,Q53HM9,Q2F840,Q53HR5,Q9H2I7,P68104,Q05639,Q6IPS9,Q2F837,P49411,A6NCI9,Q2F838,Q8TA90,Q53GA1,Q4VBZ6,Q9NZS6,Q59GP5,Q6P082,Q6P4C9,Q96I38,P24534,P63241,Q6IPT9,Q6IS14,Q9BW34,Q96RE1,Q53G89,Q14222,Q9GZV4,Q53G85,A8K795,Q5JR01,Q7Z2Z2,Q8TBL1,Q6IQ15,Q5VTE0,Q96EB3,Q96RP9,A8K339,A8K9A0,P26641,Q8IUB0,P13639,Q6NS35,Q9H7G6,…	1596	24	12983	4.06736	0.0614542	0.00144041	0.0816671
INTERPRO	IPR000795:Protein synthesis factor, GTP-binding	9	0.473186	0.000183235	Q96CD8,Q96C29,Q9H8Z6,Q9NY44,Q6NSH7,Q16577,Q7KZX8,Q53GE9,Q05CQ1,Q6PK56,Q8IYD1,Q53HR1,Q6IPN6,Q53HM9,Q96GF2,Q53HR5,Q9H2I7,P68104,Q05639,Q2F837,Q6IPS9,P49411,Q9NVY0,A6NCI9,Q53GA1,Q8TA90,Q53SI8,Q9NZS6,Q8N5A0,Q59GP5,Q6P082,O60841,Q6P4C9,Q6IPT9,Q96RE1,Q53G89,Q14222,Q53G85,Q5JR01,Q7Z2Z2,Q8TBL1,Q6IQ15,P15170,Q5VTE0,Q96EB3,Q96RP9,Q8IUB0,P13639,Q53RV7,Q6NS35,Q9H909,Q53HQ7,Q504Z0,A6NKY5	1804	17	16659	4.88884	0.345126	0.010527	0.319857
GOTERM_CC_FAT	GO:0005853~eukaryotic translation elongation factor 1 complex	5	0.262881	0.000724382	Q96CD8,Q6IPT9,Q9BW34,Q96RE1,Q96C29,Q53G89,P29692,Q6NSH7,Q14222,A8K795,Q53G85,Q16577,Q5JR01,Q53GE9,Q8TBL1,Q6IPN6,Q53HR1,Q6IQ15,Q53YD7,Q53HM9,Q2F840,Q9H2I7,Q53HR5,Q05639,Q5VTE0,P68104,Q96EB3,Q2F837,Q6IPS9,Q2F838,Q4VBZ6,Q53GA1,P26641,Q8IUB0,Q59GP5,Q9NZS6,Q6P082,Q6NS35,Q9H7G6,Q6P4C9,Q96I38,Q53HQ7,P24534,Q504Z0	1438	5	12782	8.88873	0.377892	0.00599011	1.07724
Annotation Cluster 50	Enrichment Score: 4.004256832199143
Category	Term	Count	%	PValue	Genes	List Total	Pop Hits	Pop Total	Fold Enrichment	Bonferroni	Benjamini	FDR
SMART	SM00102:ADF	8	0.42061	8.95738e-06	Q59FH4,Q9Y281,Q14019,O60234,P60983,P23528,P60981,Q6IBS0,Q9BS35,A4D2I9,Q6IB37,Q549N0,Q8TDZ6,Q9UJU6	909	10	9079	7.99032	0.00259428	0.000236122	0.0119072
INTERPRO	IPR002108:Actin-binding, cofilin/tropomyosin type	8	0.42061	1.53518e-05	Q59FH4,Q9Y281,Q14019,O60234,P60983,P23528,P60981,Q6IBS0,Q9BS35,A4D2I9,Q6IB37,Q549N0,Q8TDZ6,Q9UJU6	1804	10	16659	7.38758	0.0348414	0.00114331	0.0268353
UP_SEQ_FEATURE	domain:ADF-H	7	0.368034	2.14547e-05	Q59FH4,Q9Y281,Q14019,O60234,P60983,P23528,P60981,Q9BS35,A4D2I9,Q549N0,Q8TDZ6,Q6IB37,Q9UJU6	1886	8	19113	8.86738	0.0871108	0.00324973	0.0401213
INTERPRO	IPR017904:ADF/Cofilin/Destrin	3	0.157729	0.0325919	Q9Y281,P23528,Q549N0,P60981	1804	3	16659	9.23448	1	0.486024	43.9697
Annotation Cluster 51	Enrichment Score: 3.9548191996150313
Category	Term	Count	%	PValue	Genes	List Total	Pop Hits	Pop Total	Fold Enrichment	Bonferroni	Benjamini	FDR
GOTERM_BP_FAT	GO:0051726~regulation of cell cycle	71	3.73291	9.21518e-07	A8K6I5,Q5T3R7,Q5T3R8,Q1KLZ6,O75496,Q9NQW6,P11142,Q13564,Q59F45,Q6FGI9,Q2XSC7,Q96BE0,Q6VBB7,Q9Y4A5,Q96SB3,Q8TBS8,A7E2C4,P14635,A6NJ42,Q5TZP9,Q5U0M2,Q19RW5,Q92905,Q53XI7,A8K5E3,Q0ZAI9,O43264,Q4W5I2,Q16344,P01106,P62244,Q96B17,A8K6E5,Q9NX34,Q969X9,P14921,A7MBM5,Q9UNS1,P83731,P24941,Q8WW55,Q53GZ6,Q6IT96,A7E2E1,A8MZ91,Q59H39,Q86WG4,O14744,Q4ZFX8,Q9NSJ7,Q0EFC2,Q2XN98,P31947,O94992,Q504U6,A1XKG3,Q5H9N4,…	1611	331	13528	1.80123	0.0034231	3.26563e-05	0.00169913
GOTERM_BP_FAT	GO:0007346~regulation of mitotic cell cycle	34	1.78759	0.000408871	A8K6I5,Q53FN2,Q6LE77,P84022,Q1KLZ6,P51532,Q9NQW6,P12270,Q5JUN8,A0JNS3,Q13564,Q59F45,Q2XSC7,Q9Y4A5,Q6LE81,P06400,Q6LE80,Q96SB3,Q7Z7J0,Q8TBS8,Q59FH1,Q59GY7,A8K7C4,A8K7C6,A7E2C4,Q53GA5,Q6LE82,Q96IW5,Q9UJM1,A6NJ42,Q6LE79,Q59HH0,Q6DUF0,Q9UPT9,P60953,Q19RW5,P43487,Q8NFL2,A4D265,A8K5E3,O43264,Q4W5I2,P08243,P01106,Q5U0E4,Q96B17,A8K6E5,A7MBM5,P83731,P24941,Q8WW55,Q6MZY4,Q9UE33,A7E2E1,A8MZ91,Q0PKT5,Q59H39,…	1611	152	13528	1.87834	0.781664	0.00797707	0.751217
GOTERM_BP_FAT	GO:0010564~regulation of cell cycle process	25	1.31441	0.0036262	Q86WG4,O14744,Q53FN2,Q6LE77,Q9BXS6,Q504U6,P51532,Q9NQW6,A8K1K5,P12270,Q5JUN8,Q58F23,Q13526,O75592,P49711,Q53EY3,Q6LE81,P06400,Q6LE80,Q96SB3,Q9H0C8,Q9UM13,Q7Z7J0,Q7KZ60,A6NJC6,P49454,A7E2C4,P06748,Q6LE82,A6NL14,Q9UJM1,Q9BYG9,Q6LE79,Q99968,P50748,Q7KZ61,Q15624,O43149,Q9HBD4,Q59HH0,Q6DUF0,P60953,P27797,Q7Z5Q6,Q53XI7,Q59FZ6,P43487,Q8NFL2,A8K5E3,O43264,Q9UJX2,Q4W5I2,A8K3N7,Q96B17,A8K6E5,Q6IAT4,Q9NX34,…	1611	114	13528	1.84151	0.999999	0.0528404	6.47893
Annotation Cluster 52	Enrichment Score: 3.8291028643814293
Category	Term	Count	%	PValue	Genes	List Total	Pop Hits	Pop Total	Fold Enrichment	Bonferroni	Benjamini	FDR
SP_PIR_KEYWORDS	proteasome	25	1.31441	1.14824e-10	O43242,Q5JNW4,Q6MZZ1,Q99460,Q9Y6E3,Q05DH1,Q75L23,Q6MZI6,Q53HB3,Q05CW6,A6NP15,A8K763,P61289,P28065,Q9BZ93,Q7Z5K8,Q53FT5,Q53XP2,A8K3I7,Q53FT8,Q53XL8,Q53GN6,P54727,A8K2M0,Q16186,O14818,Q6NW36,A4D0Q1,Q53GF5,P51665,P60900,Q6IB71,P62191,Q96N86,Q53XU2,Q567Q5,P43686,P35998,P25788,P25789,Q53F10,P25787,Q05BX4,Q6ICS6,Q6FHK7,Q5LJA3,Q9Y5K5,P62195,P20618,Q7Z474,Q59GS3,Q5W0S5,Q5W0S4,Q5LJB2,Q68E00,Q5JXJ1,Q8N9M2,…	1895	56	19235	4.53143	7.27984e-08	2.02218e-09	1.70865e-07
GOTERM_CC_FAT	GO:0000502~proteasome complex	27	1.41956	4.08731e-10	O43242,Q5JNW4,Q6MZZ1,Q99460,Q9Y6E3,Q96C20,Q05DH1,Q59GA5,Q75L23,Q6MZI6,Q53HB3,A6NP15,Q05CW6,A8K763,P61289,P28065,Q9BZ93,Q7Z5K8,Q53FT5,Q53XP2,A8K3I7,Q53FT8,Q53XL8,Q53GN6,P14735,P54727,A8K2M0,Q16186,O14818,Q6NW36,A4D0Q1,Q53GF5,P51665,P60900,Q6IB71,P62191,P04792,Q96EI7,Q96N86,Q53XU2,Q567Q5,P35998,P43686,P25788,P25789,Q53F10,P25787,Q6ICS6,Q05BX4,Q6FHK7,Q5LJA3,Q9Y5K5,P62195,P20618,Q7Z474,Q59GS3,Q9UC35,…	1438	61	12782	3.93436	2.67719e-07	6.37426e-09	6.10908e-07
KEGG_PATHWAY	hsa03050:Proteasome	21	1.1041	1.10538e-05	O43242,Q5JNW4,Q6MZZ1,Q99460,Q9Y6E3,Q05DH1,Q6MZI6,Q75L23,Q53HB3,A8K763,A6NP15,Q05CW6,P61289,P28065,Q9BZ93,Q53FT5,Q53XP2,Q53FT8,A8K3I7,Q53XL8,Q53GN6,A8K2M0,O14818,Q6NW36,A4D0Q1,Q53GF5,P51665,P60900,Q6IB71,P62191,Q96N86,Q567Q5,Q53XU2,P43686,P35998,P25788,P25789,P25787,Q6FHK7,Q6ICS6,Q05BX4,P62195,P20618,Q7Z474,Q5JXJ1,Q8N9M2,Q6IBN0,A8K9A3,Q59FJ0,Q3LIA5,Q9UNM7,Q9UNM6,P62333,P49721,O00231,P49720,O00232	808	47	5085	2.81191	0.00188842	0.000189003	0.013498
SP_PIR_KEYWORDS	proteinase	9	0.473186	9.36447e-05	Q567Q5,Q53XP2,P25788,P25789,Q53FT8,P25787,Q5JNW4,Q6ICS6,Q5JXJ1,Q05DH1,Q6MZI6,P20618,Q7Z474,Q59FJ0,O14818,Q53GF5,Q6IB71,P60900,P28065,P49721,P49720,Q9BZ93	1895	17	19235	5.37374	0.0576453	0.000751281	0.139259
SP_PIR_KEYWORDS	threonine protease	9	0.473186	0.000370372	Q567Q5,Q53XP2,P25788,P25789,Q53FT8,P25787,Q5JNW4,Q6ICS6,Q5JXJ1,Q05DH1,Q6MZI6,P20618,Q7Z474,Q59FJ0,O14818,Q53GF5,Q6IB71,P60900,P28065,P49721,P49720,Q9BZ93	1895	20	19235	4.56768	0.209318	0.00246915	0.549722
INTERPRO	IPR001353:Proteasome, subunit alpha/beta	9	0.473186	0.000467033	Q567Q5,Q53XP2,P25788,P25789,Q53FT8,P25787,Q5JNW4,Q6ICS6,Q5JXJ1,Q05DH1,Q6MZI6,P20618,Q7Z474,Q59FJ0,O14818,Q53GF5,Q6IB71,P60900,P28065,P49721,P49720,Q9BZ93	1804	19	16659	4.37423	0.660098	0.0205381	0.813353
GOTERM_CC_FAT	GO:0005839~proteasome core complex	9	0.473186	0.000908202	Q567Q5,Q53XP2,P25788,P25789,Q53FT8,P25787,Q5JNW4,Q6ICS6,Q5JXJ1,Q05DH1,Q6MZI6,P20618,Q7Z474,Q59FJ0,O14818,Q53GF5,Q6IB71,P60900,P28065,P49721,P49720,Q9BZ93	1438	20	12782	3.99993	0.448516	0.00723156	1.34888
GOTERM_MF_FAT	GO:0070003~threonine-type peptidase activity	9	0.473186	0.00163781	Q567Q5,Q53XP2,P25788,P25789,Q53FT8,P25787,Q5JNW4,Q6ICS6,Q5JXJ1,Q05DH1,Q6MZI6,P20618,Q7Z474,Q59FJ0,O14818,Q53GF5,Q6IB71,P60900,P28065,P49721,P49720,Q9BZ93	1596	20	12983	3.66062	0.873845	0.029986	2.63158
GOTERM_MF_FAT	GO:0004298~threonine-type endopeptidase activity	9	0.473186	0.00163781	Q567Q5,Q53XP2,P25788,P25789,Q53FT8,P25787,Q5JNW4,Q6ICS6,Q5JXJ1,Q05DH1,Q6MZI6,P20618,Q7Z474,Q59FJ0,O14818,Q53GF5,Q6IB71,P60900,P28065,P49721,P49720,Q9BZ93	1596	20	12983	3.66062	0.873845	0.029986	2.63158
INTERPRO	IPR000426:Proteasome, alpha-subunit, conserved site	5	0.262881	0.00668602	Q567Q5,P25788,Q53XP2,P25789,P25787,Q6ICS6,Q5JXJ1,Q05DH1,Q6MZI6,Q7Z474,O14818,Q53GF5,P60900,Q6IB71,Q9BZ93	1804	8	16659	5.77155	1	0.161464	11.0664
INTERPRO	IPR016050:Proteasome, beta-type subunit, conserved site	5	0.262881	0.0332168	Q567Q5,P20618,Q53XP2,P25789,Q53FT8,Q7Z474,Q59FJ0,Q5JNW4,P28065,P49721,P49720	1804	12	16659	3.8477	1	0.489675	44.5991
INTERPRO	IPR001353:Proteasome, alpha and beta subunits	5	0.262881	0.0564429	P20618,Q53FT8,Q59FJ0,O14818,Q5JNW4,Q5JXJ1,P28065,P49721,Q05DH1,P49720	1804	14	16659	3.29803	1	0.655319	63.7851
GOTERM_CC_FAT	GO:0019773~proteasome core complex, alpha-subunit complex	3	0.157729	0.0649188	Q567Q5,Q53XP2,P25789,Q7Z474,P25787,Q6ICS6,Q53GF5,P60900,Q9BZ93,Q6MZI6	1438	4	12782	6.66655	1	0.283278	63.3308
Annotation Cluster 53	Enrichment Score: 3.753209075740997
Category	Term	Count	%	PValue	Genes	List Total	Pop Hits	Pop Total	Fold Enrichment	Bonferroni	Benjamini	FDR
GOTERM_BP_FAT	GO:0043967~histone H4 acetylation	13	0.683491	3.90085e-07	A4KYM4,Q4VBQ6,A4KYM6,Q5TG36,Q5TG38,A4D265,Q9HAF1,A8K001,Q5GRH6,Q9UNL4,Q0EF63,Q0EF62,Q9Y265,Q68DJ2,Q9Y4A5,Q5TG40,Q0VAE4,Q59FH1,Q9BT87,Q9NPF5,O95251,Q9NXR8,Q9H0E9,A6NHB0,Q9UBU8,Q9H2F5,Q92613,Q9NQC1,Q96L91,A8MSW4	1611	20	13528	5.45822	0.00145045	1.48112e-05	0.000719258
GOTERM_BP_FAT	GO:0043966~histone H3 acetylation	14	0.736067	2.12561e-06	A4KYM4,Q4VBQ6,Q76L81,Q69YR9,A4KYM6,Q92794,O75478,Q53NU6,Q9HAF1,Q8TCM6,A8K1P3,O95696,Q659H0,Q9UNL4,Q59G93,Q8WYB5,Q5CZ83,Q0EF63,Q0EF62,Q8WYH8,A6NJE2,Q57Z54,Q8N4T7,O75528,Q9ULD4,Q9BT87,Q7Z6E0,O95251,Q86X06,Q9Y4Q3,A8MVD0,Q17RB6,Q9NQC1,Q92613,Q8TE92,P55201,Q16594,A5PKX7	1611	26	13528	4.52161	0.0078782	7.06171e-05	0.00391924
GOTERM_BP_FAT	GO:0043982~histone H4-K8 acetylation	5	0.262881	0.00245768	A4KYM4,Q4VBQ6,A4KYM6,Q9UNL4,Q92613,Q9NQC1,Q9BT87,Q0EF63,Q0EF62,O95251,Q9HAF1	1611	6	13528	6.99772	0.999894	0.0380548	4.43579
GOTERM_BP_FAT	GO:0043981~histone H4-K5 acetylation	5	0.262881	0.00245768	A4KYM4,Q4VBQ6,A4KYM6,Q9UNL4,Q92613,Q9NQC1,Q9BT87,Q0EF63,Q0EF62,O95251,Q9HAF1	1611	6	13528	6.99772	0.999894	0.0380548	4.43579
GOTERM_BP_FAT	GO:0043984~histone H4-K16 acetylation	5	0.262881	0.00245768	A4KYM4,Q4VBQ6,A4KYM6,Q9UNL4,Q92613,Q9NQC1,Q9BT87,Q0EF63,Q0EF62,O95251,Q9HAF1	1611	6	13528	6.99772	0.999894	0.0380548	4.43579
GOTERM_BP_FAT	GO:0043983~histone H4-K12 acetylation	5	0.262881	0.00245768	A4KYM4,Q4VBQ6,A4KYM6,Q9UNL4,Q92613,Q9NQC1,Q9BT87,Q0EF63,Q0EF62,O95251,Q9HAF1	1611	6	13528	6.99772	0.999894	0.0380548	4.43579
Annotation Cluster 54	Enrichment Score: 3.5990822941318443
Category	Term	Count	%	PValue	Genes	List Total	Pop Hits	Pop Total	Fold Enrichment	Bonferroni	Benjamini	FDR
SMART	SM00526:H15	9	0.473186	1.6826e-05	A3R0T8,Q76L81,Q69YR9,Q5SSJ6,Q02539,Q92794,A6NI71,Q5SWC8,Q92522,Q5SWC6,P10412,Q8NDF0,Q05BI0,Q8WYB5,P16403,Q9UHY0,P16402,P16401,A8K5D7,Q4VB24,A8K4I2,Q5SSJ5,A5PKX7	909	14	9079	6.42079	0.0048677	0.00040655	0.0223661
INTERPRO	IPR005818:Histone H1/H5	9	0.473186	3.05298e-05	A3R0T8,Q76L81,Q69YR9,Q5SSJ6,Q02539,Q92794,A6NI71,Q5SWC8,Q92522,Q5SWC6,P10412,Q8NDF0,Q05BI0,Q8WYB5,P16403,Q9UHY0,P16402,P16401,A8K5D7,Q4VB24,A8K4I2,Q5SSJ5,A5PKX7	1804	14	16659	5.93645	0.0680955	0.00213484	0.0533601
INTERPRO	IPR005819:Histone H5	7	0.368034	0.000100222	A3R0T8,Q5SSJ6,Q02539,A6NI71,Q5SWC8,Q92522,Q5SWC6,P10412,Q8NDF0,Q05BI0,P16403,Q9UHY0,P16402,P16401,A8K5D7,Q4VB24,A8K4I2,Q5SSJ5	1804	9	16659	7.18237	0.206676	0.00641057	0.175067
GOTERM_BP_FAT	GO:0016584~nucleosome positioning	6	0.315457	0.000128382	A3R0T8,Q05DG0,Q53XI7,O60264,P10412,Q96T23,Q4W5G3,P16403,Q4W5H1,P16402,Q4VB24,P49711,A8K4I2	1611	6	13528	8.39727	0.379817	0.00272622	0.236453
PIR_SUPERFAMILY	PIRSF038219:histone H1	6	0.315457	0.00156313	P10412,A3R0T8,P16403,Q02539,P16402,P16401,Q4VB24,A8K4I2,Q92522	976	8	7396	5.6834	0.747573	0.158088	2.40203
SP_PIR_KEYWORDS	nucleosome	4	0.210305	0.0246229	P10412,A3R0T8,P16403,P16402,P16401,Q4VB24,A8K4I2	1895	7	19235	5.80023	1	0.107487	30.995
Annotation Cluster 55	Enrichment Score: 3.5156159659329367
Category	Term	Count	%	PValue	Genes	List Total	Pop Hits	Pop Total	Fold Enrichment	Bonferroni	Benjamini	FDR
GOTERM_BP_FAT	GO:0033043~regulation of organelle organization	53	2.78654	4.70842e-07	Q9UPN3,Q01082,P08567,Q596K9,Q15657,Q69YR8,Q68DU3,Q53FN2,P84022,A2A418,P23528,Q5JUN8,P12270,Q5VXV2,Q5VXV3,Q96PK2,Q0P5T0,P49711,Q59F45,P31146,Q01105,Q05BW8,Q9UG16,Q53R19,O15513,P11277,Q9UJM1,P09493,Q9BV73,Q6FGZ2,Q59FP7,Q59FP5,Q8TCG4,Q14917,A8K111,Q6FGQ1,Q9HB80,Q53QM2,Q8TD98,Q92889,P60953,P26358,Q6DV90,Q53XI7,P43487,Q8TDA3,Q8NFL2,Q4VBY4,Q59FV6,Q5H9P1,Q0P5N8,Q4W5I2,Q6IPL3,P52907,A4D275,Q05CU6,P01106,…	1611	217	13528	2.05095	0.00175047	1.76969e-05	0.000868161
GOTERM_BP_FAT	GO:0044087~regulation of cellular component biogenesis	38	1.9979	2.58823e-06	Q01082,P08567,Q59FI5,Q596K9,Q69YR8,Q15657,P84022,A2A418,Q5JUN8,Q0P5T0,Q59F45,Q3MIH3,P31146,Q05BW8,Q6AI22,Q9UG16,Q86VS1,Q53R19,Q5PY61,O15513,P11277,Q9UJM1,P09493,Q6FGZ2,Q9NU22,Q59FP5,Q14917,Q8TCG4,Q49A90,Q6FGQ1,Q53QM2,P60953,Q05C05,Q2TSD3,P17252,Q6DV90,Q66K58,Q9UFQ0,Q59FV6,Q4VBY4,Q0P5N8,Q5H9P1,P62979,P52907,A4D275,Q05CU6,P42345,Q2TNI1,Q59GZ2,Q6ZN40,Q13131,Q4LE76,Q8WYN9,Q9UCI1,Q9UCI2,P63313,O15144,…	1611	142	13528	2.24716	0.0095846	8.23113e-05	0.00477221
GOTERM_BP_FAT	GO:0043254~regulation of protein complex assembly	28	1.47213	3.35436e-06	Q01082,P08567,Q596K9,Q69YR8,Q5T0I0,Q5T0I1,Q5T0I2,A2A418,Q03135,Q32Q68,P62328,Q0P5P4,Q0P5T0,Q53GE2,P31146,Q05BW8,Q6AI22,Q9UG16,Q53R19,P11277,Q08EQ4,Q2KHM7,Q13813,Q9UJM1,P47755,P47756,Q6FGZ2,Q9NU22,Q9NST9,A5D8W9,Q59FP5,Q14917,Q86X89,Q2LE71,P61158,P46821,Q6FGQ1,Q53QM2,Q9NYD7,P60953,Q05C05,Q6PJJ1,Q6R327,Q71VG2,Q4VBY4,Q59FV6,Q71VG0,P51610,Q86VP6,Q0P5N8,Q71VG1,Q5H9P1,P52907,A4D275,Q8WYB3,A2VCK8,Q05CU6,…	1611	90	13528	2.61248	0.012404	0.000104008	0.00618477
GOTERM_BP_FAT	GO:0008064~regulation of actin polymerization or depolymerization	22	1.15668	3.65965e-06	P08567,Q01082,Q596K9,Q69YR8,Q68DU3,Q5T0I0,Q5T0I1,Q5T0I2,A2A418,P23528,Q32Q68,Q0P5P4,P62328,Q0P5T0,Q53GE2,P31146,Q9UG16,Q53R19,Q13796,P11277,P60981,Q08EQ4,Q2KHM7,Q13813,P47755,P47756,Q6FGZ2,Q9NST9,Q59FP5,Q14917,Q2LE71,P61158,Q6FGQ1,Q53QM2,Q6R327,Q71VG2,Q59FV6,Q71VG0,Q71VG1,Q0P5N8,P52907,Q8WYB3,A4D275,Q05CU6,A2VCK8,Q59GZ2,P42345,Q4LE76,P63313,O15144,A4D0V4,O15145,O15143,Q5U025,Q53GC7,Q53RC4,Q6FH17,…	1611	61	13528	3.02852	0.0135253	0.000112536	0.00674765
GOTERM_BP_FAT	GO:0030832~regulation of actin filament length	22	1.15668	6.55867e-06	P08567,Q01082,Q596K9,Q69YR8,Q68DU3,Q5T0I0,Q5T0I1,Q5T0I2,A2A418,P23528,Q32Q68,Q0P5P4,P62328,Q0P5T0,Q53GE2,P31146,Q9UG16,Q53R19,Q13796,P11277,P60981,Q08EQ4,Q2KHM7,Q13813,P47755,P47756,Q6FGZ2,Q9NST9,Q59FP5,Q14917,Q2LE71,P61158,Q6FGQ1,Q53QM2,Q6R327,Q71VG2,Q59FV6,Q71VG0,Q71VG1,Q0P5N8,P52907,Q8WYB3,A4D275,Q05CU6,A2VCK8,Q59GZ2,P42345,Q4LE76,P63313,O15144,A4D0V4,O15145,O15143,Q5U025,Q53GC7,Q53RC4,Q6FH17,…	1611	63	13528	2.93238	0.0241095	0.000193671	0.0120925
GOTERM_BP_FAT	GO:0051493~regulation of cytoskeleton organization	35	1.84017	1.69872e-05	Q9UPN3,Q01082,P08567,Q596K9,Q15657,Q69YR8,Q68DU3,P84022,A2A418,P23528,Q5JUN8,Q96PK2,Q0P5T0,Q59F45,P31146,Q05BW8,Q9UG16,Q53R19,O15513,P11277,P09493,Q9BV73,Q6FGZ2,Q59FP5,Q14917,Q8TCG4,Q6FGQ1,Q53QM2,Q6DV90,P43487,Q8TDA3,Q59FV6,Q4VBY4,Q0P5N8,Q5H9P1,Q6IPL3,P52907,A4D275,Q05CU6,Q2TNI1,Q59GZ2,P42345,Q6ZN40,Q4LE76,Q9UCI1,Q9UCI2,Q9NX34,P63313,O15144,A4D0V4,O15145,Q8WUG4,O15143,Q53GC7,P35241,P06396,Q7Z6L8,…	1611	136	13528	2.16106	0.0612536	0.000448197	0.0313173
GOTERM_BP_FAT	GO:0032956~regulation of actin cytoskeleton organization	25	1.31441	7.95934e-05	Q01082,P08567,Q596K9,Q69YR8,Q15657,Q68DU3,Q5T0I0,Q5T0I1,Q5T0I2,P84022,P23528,A2A418,Q5JUN8,Q32Q68,P62328,Q0P5P4,Q0P5T0,Q53GE2,Q59F45,P31146,Q9UG16,Q53R19,Q13796,O15513,P11277,P60981,Q08EQ4,Q2KHM7,A8K4B6,Q13813,P09493,P47755,P47756,Q6FGZ2,Q9NST9,Q59FP5,Q14917,Q8TCG4,Q2LE71,P61158,Q6FGQ1,Q53QM2,Q6DV90,Q6R327,Q71VG2,Q59FV6,Q71VG0,Q0P5N8,Q71VG1,P52907,A4D275,Q8WYB3,Q07413,Q07414,A2VCK8,Q05CU6,P42345,…	1611	89	13528	2.35878	0.256345	0.00176142	0.146657
GOTERM_BP_FAT	GO:0032271~regulation of protein polymerization	21	1.1041	8.3021e-05	Q01082,Q596K9,Q69YR8,Q5T0I0,Q5T0I1,Q5T0I2,A2A418,Q03135,Q32Q68,P62328,Q0P5P4,Q0P5T0,Q53GE2,P31146,Q05BW8,Q9UG16,Q53R19,P11277,Q08EQ4,Q2KHM7,Q13813,P47755,P47756,Q6FGZ2,Q9NST9,Q59FP5,Q14917,Q86X89,Q2LE71,P61158,P46821,Q53QM2,Q6R327,Q71VG2,Q59FV6,Q4VBY4,Q71VG0,Q71VG1,Q0P5N8,Q5H9P1,P52907,Q8WYB3,A4D275,Q05CU6,A2VCK8,Q32NB7,P42345,Q2TNI1,Q4LE76,P63313,O15144,A4D0V4,O15145,O15143,Q5U025,Q53GC7,Q53RC4,…	1611	68	13528	2.59327	0.265771	0.00181561	0.152968
GOTERM_BP_FAT	GO:0030833~regulation of actin filament polymerization	18	0.946372	0.000110388	Q01082,Q596K9,Q69YR8,Q5T0I0,Q5T0I1,Q5T0I2,A2A418,Q32Q68,P62328,Q0P5P4,Q0P5T0,Q53GE2,P31146,Q9UG16,Q53R19,P11277,Q08EQ4,Q2KHM7,Q13813,P47755,P47756,Q6FGZ2,Q9NST9,Q14917,Q59FP5,Q2LE71,P61158,Q53QM2,Q6R327,Q71VG2,Q59FV6,Q71VG0,Q0P5N8,Q71VG1,P52907,A4D275,Q8WYB3,A2VCK8,Q05CU6,P42345,Q4LE76,P63313,O15144,A4D0V4,O15145,O15143,Q5U025,Q53GC7,Q53RC4,Q6FH17,P35241,P06396,P62330,Q6PKD3,Q96QW8	1611	54	13528	2.79909	0.336864	0.00235799	0.203343
GOTERM_BP_FAT	GO:0030834~regulation of actin filament depolymerization	12	0.630915	0.000138496	Q01082,P08567,Q69YR8,Q68DU3,Q5T0I0,Q5T0I1,Q5T0I2,A2A418,P23528,Q71VG2,Q71VG0,Q71VG1,P52907,Q32Q68,Q8WYB3,Q05CU6,Q53GE2,Q59GZ2,A4D0V4,Q9UG16,Q53GC7,Q13796,P11277,Q53RC4,P60981,Q13813,P35241,P06396,P47755,P47756,Q9NST9,Q14917,Q59FP5,Q6PKD3,Q6FGQ1	1611	27	13528	3.73212	0.402726	0.0028912	0.255058
GOTERM_BP_FAT	GO:0032970~regulation of actin filament-based process	25	1.31441	0.000140063	Q01082,P08567,Q596K9,Q69YR8,Q15657,Q68DU3,Q5T0I0,Q5T0I1,Q5T0I2,P84022,P23528,A2A418,Q5JUN8,Q32Q68,P62328,Q0P5P4,Q0P5T0,Q53GE2,Q59F45,P31146,Q9UG16,Q53R19,Q13796,O15513,P11277,P60981,Q08EQ4,Q2KHM7,A8K4B6,Q13813,P09493,P47755,P47756,Q6FGZ2,Q9NST9,Q59FP5,Q14917,Q8TCG4,Q2LE71,P61158,Q6FGQ1,Q53QM2,Q6DV90,Q6R327,Q71VG2,Q59FV6,Q71VG0,Q0P5N8,Q71VG1,P52907,A4D275,Q8WYB3,Q07413,Q07414,A2VCK8,Q05CU6,P42345,…	1611	92	13528	2.28187	0.406199	0.00290756	0.25794
GOTERM_BP_FAT	GO:0043244~regulation of protein complex disassembly	17	0.893796	0.000182673	Q6IBG0,P08567,Q01082,Q69YR8,Q68DU3,Q5T0I0,Q5T0I1,Q5T0I2,A2A418,P23528,Q32Q68,Q53GE2,Q92974,Q05BW8,Q9UG16,Q13796,P11277,P60981,Q13813,P47755,P47756,Q9NST9,Q59FP5,Q14917,Q86X89,Q6FGQ1,P46821,P63241,Q9H023,Q6IS14,Q9GZV4,Q71VG2,Q8TDA3,Q4VBY4,Q71VG0,Q5VY93,Q71VG1,Q5H9P1,Q5VY92,P52907,Q8WYB3,Q05CU6,Q32NB7,Q59GZ2,A4D0V4,Q8WUG4,Q53GC7,Q53RC4,A2BDK5,A8K9A0,P35241,P06396,Q6PJD3,P52758,Q6PKD3	1611	51	13528	2.79909	0.493276	0.0037487	0.336287
GOTERM_BP_FAT	GO:0010639~negative regulation of organelle organization	22	1.15668	0.000468561	Q01082,Q596K9,Q69YR8,Q68DU3,Q5T0I0,Q5T0I1,Q5T0I2,A2A418,Q504U6,P12270,Q5VXV2,Q32Q68,Q5VXV3,P62328,Q0P5P4,Q58F23,Q0P5T0,Q53GE2,P31146,Q92974,Q01105,Q05BW8,Q9UG16,Q13796,P11277,P49454,P06748,Q08EQ4,Q2KHM7,Q13813,Q9BYG9,P47755,P47756,Q59FP7,Q9NST9,Q59FP5,Q14917,Q99968,A8K111,Q86X89,Q15624,P46821,Q9H023,Q15554,Q92889,A0AV63,P26358,Q71VG2,Q8TDA3,Q4VBY4,Q71VG0,Q5VY93,Q71VG1,Q0P5N8,Q5VY92,Q5H9P1,P52907,…	1611	82	13528	2.25293	0.825167	0.00899517	0.860437
GOTERM_BP_FAT	GO:0051129~negative regulation of cellular component organization	31	1.62986	0.001167	Q01082,Q596K9,Q69YR8,Q68DU3,A2A418,Q53R94,P12270,Q5VXV2,Q5VXV3,Q0P5T0,Q9UNF0,P31146,Q01105,Q05BW8,Q9UG16,P11277,Q9UJM1,Q59FP7,Q6FGZ2,Q53SY1,Q59FP5,Q14917,A8K111,Q92889,P26358,P60953,P52565,Q8TDA3,Q4VBY4,Q0P5N8,Q5H9P1,P52907,Q7L7Q6,Q7L7Q5,Q8IUA4,Q05CU6,Q96B16,Q7L7Q8,Q9NX34,Q6FIA3,P63313,A4D0V4,Q8WUG4,Q53GC7,Q9UE33,P35241,P06396,Q7L099,Q15691,Q04917,Q9BTI9,Q6IPN0,Q5T0I0,Q5T0I1,Q5T0I2,Q504U6,Q53RF4,…	1611	142	13528	1.83321	0.987028	0.0200062	2.13002
GOTERM_BP_FAT	GO:0032272~negative regulation of protein polymerization	11	0.578339	0.00130867	Q01082,Q596K9,Q69YR8,Q5T0I0,Q5T0I1,Q5T0I2,Q71VG2,A2A418,Q71VG0,Q71VG1,Q0P5N8,P52907,Q32Q68,Q8WYB3,Q0P5P4,P62328,Q05CU6,A2VCK8,Q0P5T0,Q53GE2,P63313,A4D0V4,Q9UG16,Q53GC7,P11277,Q53RC4,Q13813,Q2KHM7,Q08EQ4,P35241,P06396,P47755,P47756,Q9NST9,Q14917,Q59FP5,Q15691,Q6PKD3	1611	29	13528	3.18517	0.992348	0.0221042	2.38567
GOTERM_BP_FAT	GO:0031333~negative regulation of protein complex assembly	12	0.630915	0.00138126	Q01082,Q596K9,P60953,Q69YR8,Q5T0I0,Q5T0I1,Q5T0I2,Q71VG2,A2A418,Q71VG0,Q71VG1,Q0P5N8,P52907,Q32Q68,Q8WYB3,Q0P5P4,P62328,Q05CU6,A2VCK8,Q0P5T0,Q53GE2,P63313,A4D0V4,Q9UG16,Q53GC7,P11277,Q53RC4,Q13813,Q08EQ4,Q2KHM7,Q9UJM1,P35241,P06396,P47755,P47756,Q9NST9,Q14917,Q59FP5,Q15691,Q6PKD3	1611	34	13528	2.96374	0.994161	0.0232113	2.51639
SP_PIR_KEYWORDS	actin capping	8	0.42061	0.00153886	Q01082,Q69YR8,Q5T0I0,Q5T0I1,Q5T0I2,A2A418,Q71VG2,Q71VG0,Q71VG1,P52907,Q32Q68,Q8WYB3,Q05CU6,Q53GE2,A4D0V4,Q9UG16,Q53GC7,Q53RC4,P11277,Q13813,P35241,P47755,P06396,P47756,Q9NST9,Q14917,Q59FP5,Q6PKD3	1895	19	19235	4.27385	0.623331	0.00899988	2.26562
GOTERM_BP_FAT	GO:0030837~negative regulation of actin filament polymerization	10	0.525762	0.00391121	Q01082,Q596K9,Q69YR8,Q5T0I0,Q5T0I1,Q5T0I2,Q71VG2,A2A418,Q71VG0,Q71VG1,Q0P5N8,P52907,Q32Q68,Q8WYB3,Q0P5P4,P62328,Q05CU6,A2VCK8,Q0P5T0,Q53GE2,P63313,A4D0V4,Q9UG16,Q53GC7,P11277,Q53RC4,Q13813,Q2KHM7,Q08EQ4,P35241,P06396,P47755,P47756,Q9NST9,Q14917,Q59FP5,Q6PKD3	1611	28	13528	2.99902	1	0.0562233	6.97096
GOTERM_BP_FAT	GO:0051494~negative regulation of cytoskeleton organization	15	0.788644	0.00419221	Q01082,Q596K9,Q69YR8,Q68DU3,Q5T0I0,Q5T0I1,Q5T0I2,A2A418,Q32Q68,P62328,Q0P5P4,Q0P5T0,Q53GE2,P31146,Q92974,Q05BW8,Q9UG16,Q13796,P11277,Q08EQ4,Q2KHM7,Q13813,P47755,P47756,Q9NST9,Q14917,Q59FP5,Q86X89,P46821,Q9H023,Q8TDA3,Q71VG2,Q4VBY4,Q5VY93,Q71VG0,Q0P5N8,Q5H9P1,Q5VY92,Q71VG1,P52907,Q8WYB3,A2VCK8,Q05CU6,Q32NB7,P63313,A4D0V4,Q8WUG4,Q53GC7,Q53RC4,A2BDK5,P35241,P06396,Q6PJD3,Q15691,Q6PKD3	1611	55	13528	2.29016	1	0.0596878	7.45366
GOTERM_BP_FAT	GO:0030835~negative regulation of actin filament depolymerization	9	0.473186	0.00502042	Q01082,Q69YR8,Q68DU3,Q5T0I0,Q5T0I1,Q5T0I2,A2A418,Q71VG2,Q71VG0,Q71VG1,P52907,Q32Q68,Q8WYB3,Q05CU6,Q53GE2,A4D0V4,Q9UG16,Q53GC7,Q13796,Q53RC4,P11277,Q13813,P35241,P47755,P06396,P47756,Q9NST9,Q14917,Q59FP5,Q6PKD3	1611	24	13528	3.14898	1	0.07028	8.86265
GOTERM_BP_FAT	GO:0051693~actin filament capping	8	0.42061	0.0112913	Q01082,Q69YR8,Q5T0I0,Q5T0I1,Q5T0I2,A2A418,Q71VG2,Q71VG0,Q71VG1,P52907,Q32Q68,Q8WYB3,Q05CU6,Q53GE2,A4D0V4,Q9UG16,Q53GC7,Q53RC4,P11277,Q13813,P35241,P47755,P06396,P47756,Q9NST9,Q14917,Q59FP5,Q6PKD3	1611	22	13528	3.05355	1	0.132198	18.8913
GOTERM_BP_FAT	GO:0043242~negative regulation of protein complex disassembly	11	0.578339	0.0194788	Q01082,Q69YR8,Q68DU3,Q5T0I0,Q5T0I1,Q5T0I2,Q71VG2,Q8TDA3,A2A418,Q4VBY4,Q71VG0,Q5VY93,Q71VG1,Q5VY92,Q5H9P1,P52907,Q32Q68,Q8WYB3,Q05CU6,Q32NB7,Q53GE2,Q92974,Q05BW8,A4D0V4,Q8WUG4,Q9UG16,Q53GC7,Q13796,P11277,Q53RC4,Q13813,A2BDK5,P35241,Q6PJD3,P06396,P47755,P47756,Q9NST9,Q14917,Q59FP5,Q6PKD3,Q86X89,P46821,Q9H023	1611	41	13528	2.25293	1	0.203332	30.4209
GOTERM_BP_FAT	GO:0032535~regulation of cellular component size	45	2.36593	0.0196198	P08567,Q01082,Q596K9,Q69YR8,Q68DU3,A8K7B7,Q6LE77,P84022,P23528,A2A418,Q53R94,Q0P5T0,Q59F45,Q2XSC7,Q6LE81,P06400,Q6LE80,P31146,Q96SB3,Q9BT62,Q7Z7J0,Q05BW8,Q7Z7J6,Q9UG16,Q53R19,P17844,P11277,Q53GA5,Q6LE82,Q5T8M9,Q6LE79,Q6FGZ2,Q53SY1,P67775,Q59FP5,Q14917,Q6IQ41,Q6FGQ1,Q16594,Q59HH0,Q6DUF0,Q53QM2,Q7Z2V5,A8K4R4,Q19RW5,Q13642,P58546,Q4VBY4,Q59FV6,A8K5E3,Q0P5N8,Q5H9P1,Q96GV1,P52907,Q7L7Q6,Q7L7Q5,A4D275,…	1611	271	13528	1.39438	1	0.203529	30.605
GOTERM_CC_FAT	GO:0008290~F-actin capping protein complex	3	0.157729	0.181257	P52907,Q32Q68,P47755,A4D0V4,P47756,Q53GE2,Q53GC7	1438	7	12782	3.80946	1	0.545745	94.9665
Annotation Cluster 56	Enrichment Score: 3.502510999898495
Category	Term	Count	%	PValue	Genes	List Total	Pop Hits	Pop Total	Fold Enrichment	Bonferroni	Benjamini	FDR
GOTERM_BP_FAT	GO:0046112~nucleobase biosynthetic process	11	0.578339	3.53325e-07	Q3B7A7,A8K639,A8KA32,Q53SY7,P07741,P49915,A8MWG9,Q53FW2,P11172,A8K5J1,A8K945,P22102,P27708,Q96CK3,Q15374,Q53SZ4,A8K5A2,P00813,A8K4H7,Q12882,Q53F90,Q06203,P34896,Q52M77,Q71VH3,Q68CQ5,Q53H22,A2RRQ3,P22234,A2RRQ2,P60891,Q59HH3	1611	14	13528	6.59785	0.00131386	1.36949e-05	0.000651478
GOTERM_BP_FAT	GO:0006144~purine base metabolic process	10	0.525762	5.35912e-06	Q3B7A7,A8K639,A8KA32,P07741,P49915,A8MWG9,Q53FW2,Q5T695,Q5T694,Q5T693,A8K945,P22102,Q15374,Q01433,A8K5A2,P00813,A8K4H7,Q12882,Q53F90,Q06203,P34896,Q52M77,Q71VH3,Q68CQ5,Q53H22,A2RRQ3,P22234,A2RRQ2,P60891,Q59HH3	1611	14	13528	5.99805	0.0197438	0.00016344	0.00988098
GOTERM_BP_FAT	GO:0009161~ribonucleoside monophosphate metabolic process	13	0.683491	9.07569e-06	Q3B7A7,Q53S28,A8K639,Q9UIJ7,A8KA32,P12268,A8MWG9,P49915,Q53FW2,P11172,Q5T695,Q5T694,Q5T693,P30566,A8K5J1,A8K945,P22102,Q71UA4,A8K5A2,Q15374,Q01433,P00813,A8K4H7,Q12882,Q53F90,Q06203,Q9HC01,Q7Z531,Q52M77,P31939,Q71VH3,Q68CQ5,Q53H22,A2RRQ3,A2RRQ2,P22234,Q7Z4Y4,P60891,Q59HH3	1611	25	13528	4.36658	0.0332069	0.000259742	0.0167329
GOTERM_BP_FAT	GO:0009113~purine base biosynthetic process	8	0.42061	9.66965e-06	Q3B7A7,A8K639,Q53F90,Q06203,A8KA32,P34896,P07741,P49915,Q52M77,Q53FW2,Q71VH3,Q68CQ5,A8K945,Q53H22,P22234,P22102,P60891,Q15374,Q59HH3,P00813,A8K4H7	1611	9	13528	7.46424	0.0353413	0.000274626	0.0178279
GOTERM_BP_FAT	GO:0009156~ribonucleoside monophosphate biosynthetic process	12	0.630915	2.26011e-05	Q3B7A7,Q53S28,A8K639,A8KA32,P12268,A8MWG9,P49915,P11172,Q53FW2,Q5T695,Q5T694,P30566,Q5T693,A8K5J1,A8K945,P22102,Q71UA4,Q15374,A8K5A2,Q01433,P00813,A8K4H7,Q12882,Q53F90,Q06203,Q52M77,P31939,Q71VH3,Q68CQ5,Q53H22,A2RRQ3,P22234,A2RRQ2,P60891,Q59HH3	1611	23	13528	4.38118	0.0806603	0.000575859	0.0416649
GOTERM_BP_FAT	GO:0009112~nucleobase metabolic process	12	0.630915	2.26011e-05	Q3B7A7,A8K639,A8KA32,Q53SY7,P07741,A8MWG9,P49915,P11172,Q53FW2,Q5T695,Q5T694,Q5T693,A8K5J1,A8K945,P22102,P27708,Q96CK3,Q15374,A8K5A2,Q01433,Q53SZ4,P00813,A8K4H7,Q12882,Q53F90,Q06203,P34896,Q52M77,Q71VH3,Q68CQ5,Q53H22,A2RRQ3,P22234,A2RRQ2,P60891,Q59HH3	1611	23	13528	4.38118	0.0806603	0.000575859	0.0416649
GOTERM_BP_FAT	GO:0009126~purine nucleoside monophosphate metabolic process	11	0.578339	3.30914e-05	Q3B7A7,Q53S28,A8K639,Q9UIJ7,A8KA32,P12268,P49915,Q53FW2,Q5T695,Q5T694,Q5T693,P30566,A8K945,P22102,Q71UA4,Q01433,Q15374,P00813,A8K4H7,Q53F90,Q06203,Q9HC01,Q7Z531,Q52M77,P31939,Q71VH3,Q68CQ5,Q53H22,P22234,Q7Z4Y4,P60891,Q59HH3	1611	20	13528	4.6185	0.115856	0.000799259	0.0609981
GOTERM_BP_FAT	GO:0009167~purine ribonucleoside monophosphate metabolic process	11	0.578339	3.30914e-05	Q3B7A7,Q53S28,A8K639,Q9UIJ7,A8KA32,P12268,P49915,Q53FW2,Q5T695,Q5T694,Q5T693,P30566,A8K945,P22102,Q71UA4,Q01433,Q15374,P00813,A8K4H7,Q53F90,Q06203,Q9HC01,Q7Z531,Q52M77,P31939,Q71VH3,Q68CQ5,Q53H22,P22234,Q7Z4Y4,P60891,Q59HH3	1611	20	13528	4.6185	0.115856	0.000799259	0.0609981
SP_PIR_KEYWORDS	purine biosynthesis	8	0.42061	4.49811e-05	Q3B7A7,Q53S28,A8K639,Q53F90,Q06203,A8KA32,P12268,P49915,Q52M77,P31939,Q71VH3,P11586,Q68CQ5,P30566,A8K945,Q53H22,P22234,P22102,Q71UA4,Q15374,Q59HH3,A8K4H7	1895	12	19235	6.76693	0.0281159	0.000385313	0.0669138
GOTERM_BP_FAT	GO:0009127~purine nucleoside monophosphate biosynthetic process	10	0.525762	8.32298e-05	Q3B7A7,Q53S28,A8K639,A8KA32,P12268,P49915,Q53FW2,Q5T695,Q5T694,Q5T693,P30566,A8K945,P22102,Q71UA4,Q01433,Q15374,P00813,A8K4H7,Q53F90,Q06203,Q52M77,P31939,Q71VH3,Q68CQ5,Q53H22,P22234,P60891,Q59HH3	1611	18	13528	4.66515	0.266341	0.00180954	0.153352
GOTERM_BP_FAT	GO:0009168~purine ribonucleoside monophosphate biosynthetic process	10	0.525762	8.32298e-05	Q3B7A7,Q53S28,A8K639,A8KA32,P12268,P49915,Q53FW2,Q5T695,Q5T694,Q5T693,P30566,A8K945,P22102,Q71UA4,Q01433,Q15374,P00813,A8K4H7,Q53F90,Q06203,Q52M77,P31939,Q71VH3,Q68CQ5,Q53H22,P22234,P60891,Q59HH3	1611	18	13528	4.66515	0.266341	0.00180954	0.153352
GOTERM_BP_FAT	GO:0046040~IMP metabolic process	5	0.262881	0.00245768	Q3B7A7,Q53S28,Q06203,A8KA32,Q52M77,P31939,Q71VH3,P30566,Q68CQ5,Q53H22,A8K945,P22234,P22102,Q71UA4,Q15374,Q59HH3,A8K4H7	1611	6	13528	6.99772	0.999894	0.0380548	4.43579
GOTERM_BP_FAT	GO:0006189~'de novo' IMP biosynthetic process	5	0.262881	0.00245768	Q3B7A7,Q53S28,Q06203,A8KA32,Q52M77,P31939,Q71VH3,P30566,Q68CQ5,Q53H22,A8K945,P22234,P22102,Q71UA4,Q15374,Q59HH3,A8K4H7	1611	6	13528	6.99772	0.999894	0.0380548	4.43579
GOTERM_BP_FAT	GO:0006188~IMP biosynthetic process	5	0.262881	0.00245768	Q3B7A7,Q53S28,Q06203,A8KA32,Q52M77,P31939,Q71VH3,P30566,Q68CQ5,Q53H22,A8K945,P22234,P22102,Q71UA4,Q15374,Q59HH3,A8K4H7	1611	6	13528	6.99772	0.999894	0.0380548	4.43579
GOTERM_BP_FAT	GO:0042440~pigment metabolic process	12	0.630915	0.0143957	Q3B7A7,A8K639,A8KA32,P07741,P49915,P09601,P53004,Q53FW2,A8K2L0,A8K945,Q68Y91,Q13907,P22102,A8K747,Q15374,P00813,A8K4H7,P08397,Q53F90,Q06203,Q6FH11,P34896,Q52M77,Q71VH3,Q68CQ5,Q53H22,Q96DI8,P22234,P60891,Q6LER4,Q0G847,Q59HH3	1611	45	13528	2.23927	1	0.161655	23.4606
GOTERM_BP_FAT	GO:0009124~nucleoside monophosphate biosynthetic process	12	0.630915	0.0305554	Q3B7A7,Q53S28,A8K639,A8KA32,P12268,A8MWG9,P49915,P11172,Q53FW2,Q5T695,Q5T694,P30566,Q5T693,A8K5J1,A8K945,P22102,Q71UA4,Q15374,A8K5A2,Q01433,P00813,A8K4H7,Q12882,Q53F90,Q06203,Q52M77,P31939,Q71VH3,Q68CQ5,Q53H22,A2RRQ3,P22234,A2RRQ2,P60891,Q59HH3	1611	50	13528	2.01534	1	0.280339	43.5709
GOTERM_BP_FAT	GO:0046148~pigment biosynthetic process	10	0.525762	0.0363341	Q3B7A7,A8K639,A8KA32,P07741,P49915,Q53FW2,A8K2L0,A8K945,Q68Y91,Q13907,P22102,Q15374,P00813,A8K4H7,P08397,Q53F90,Q06203,P34896,Q52M77,Q71VH3,Q68CQ5,Q53H22,P22234,P60891,Q6LER4,Q0G847,Q59HH3	1611	39	13528	2.15315	1	0.317154	49.4609
GOTERM_BP_FAT	GO:0009123~nucleoside monophosphate metabolic process	13	0.683491	0.0875719	Q3B7A7,Q53S28,A8K639,Q9UIJ7,A8KA32,P12268,A8MWG9,P49915,Q53FW2,P11172,Q5T695,Q5T694,Q5T693,P30566,A8K5J1,A8K945,P22102,Q71UA4,A8K5A2,Q15374,Q01433,P00813,A8K4H7,Q12882,Q53F90,Q06203,Q9HC01,Q7Z531,Q52M77,P31939,Q71VH3,Q68CQ5,Q53H22,A2RRQ3,A2RRQ2,P22234,Q7Z4Y4,P60891,Q59HH3	1611	66	13528	1.65401	1	0.562072	81.5447
KEGG_PATHWAY	hsa00230:Purine metabolism	26	1.36698	0.470844	Q3B7A7,Q9P1G4,Q504U3,A8K516,P30613,Q9BVK7,P07741,P12268,P49915,Q32Q12,O14802,P54819,Q71UA4,Q308M6,Q15374,Q01433,Q8WUW7,P36959,A8K4H7,Q53F90,A8K6L1,Q52M77,P78533,Q68CQ5,P23921,Q9UK31,Q59HH3,Q6FHN3,Q53S28,A8K639,Q6LCT6,Q86T14,Q6FGK3,A8KA32,Q5U0M9,Q53FW2,Q5T695,Q5T694,P30566,Q5T693,A8K945,P22392,P00491,P22102,Q8TCW4,Q8TCS8,P28340,Q8TCW3,Q8TCW2,Q6PKC0,Q9NYI7,A6NFK3,P00813,Q86XQ2,Q86SZ5,Q9GZS1,Q06203,…	808	153	5085	1.06945	1	0.807766	99.9579
Annotation Cluster 57	Enrichment Score: 3.4597292111604054
Category	Term	Count	%	PValue	Genes	List Total	Pop Hits	Pop Total	Fold Enrichment	Bonferroni	Benjamini	FDR
SP_PIR_KEYWORDS	stress response	20	1.05152	1.26271e-05	Q59EJ3,Q53HF2,Q2VPJ6,Q96C20,P61604,P11142,A2ICT2,Q53ZP9,Q9BV61,Q96HX7,Q96BE0,Q96H53,Q14568,Q53SE2,Q53G55,Q96IS6,Q53FS6,Q2TAL4,Q59EK6,Q2F839,P48741,Q6PK50,P38646,Q86U12,Q53X54,P08238,Q9NZ87,Q8TBA7,P10809,P04792,Q86SX1,Q96EI7,A8K5I0,P34932,Q6FI51,Q7KYN0,Q5TBM7,Q8N1C8,P25685,Q58FG0,Q9H6X9,Q58FF9,P07900,Q58FF8,P08107,O95757,Q58FF7,Q96RI4,Q9UCR6,Q9UC35,Q59GF8,O95433,Q9UQC1,P54652,Q6FHS4,A8K500,Q9NWW3,…	1895	66	19235	3.07588	0.00797368	0.000117723	0.0187883
GOTERM_BP_FAT	GO:0006986~response to unfolded protein	20	1.05152	0.000475064	P31689,Q59EJ3,Q53HF2,Q2VPJ6,Q96C20,Q5T7Q0,P61604,P11142,A2ICT2,Q53ZP9,Q9P2K8,Q53FB0,Q96HX7,Q96BE0,Q96H53,Q14568,Q53SE2,Q96IS6,Q2TAL4,P49588,P48741,Q6PK50,Q86TL9,Q86U12,O00299,P08238,Q9NZ87,O95292,Q8TBA7,Q53X54,P10809,Q59EZ6,P04792,Q86SX1,Q96EI7,A8K5I0,P34932,Q6FI51,Q53XM7,Q7KYN0,Q5TBM7,P67870,P25685,Q9H6X9,P07900,P08107,A2A2F2,O95757,Q96RI4,Q9UCR6,Q9UC35,Q59GF8,Q5SRT3,Q9UQC1,P54652,Q6FHS4,A8K500,…	1611	71	13528	2.36543	0.829349	0.00907269	0.87233
GOTERM_BP_FAT	GO:0051789~response to protein stimulus	23	1.20925	0.00696236	P31689,Q59EJ3,Q2VPJ6,Q53HF2,Q96C20,Q5T7Q0,P61604,P11142,A2ICT2,Q53ZP9,Q9P2K8,Q53FB0,Q96HX7,Q96BE0,Q96H53,Q14568,Q53SE2,Q96IS6,Q05BW8,Q2TAL4,P49588,P48741,Q6PK50,Q86TL9,Q86U12,O00299,Q53X54,Q8TBA7,P08238,Q9NZ87,O95292,P10809,Q59EZ6,Q86X89,P61158,Q86SX1,P04792,P46821,Q96EI7,A8K5I0,Q53QM2,P34932,Q6FI51,Q53XM7,Q7KYN0,P67870,Q5TBM7,P25685,Q59FV6,Q4VBY4,Q5H9P1,P07900,Q9H6X9,P08107,A2A2F2,O95757,Q96RI4,…	1611	107	13528	1.80502	1	0.0895842	12.0872
Annotation Cluster 58	Enrichment Score: 3.448624903088185
Category	Term	Count	%	PValue	Genes	List Total	Pop Hits	Pop Total	Fold Enrichment	Bonferroni	Benjamini	FDR
INTERPRO	IPR006195:Aminoacyl-tRNA synthetase, class II, conserved region	14	0.736067	4.20429e-10	P14868,Q96I59,A8K5X5,Q9H9M6,Q9NP81,Q8TEA8,Q68CR9,Q5JRF7,Q53R85,Q6IBR2,A8K3J2,Q0VGA5,A8MSK1,Q5M7Z9,Q9NVT8,Q9HB23,Q9Y285,Q53GX7,Q52NV4,P26639,P41250,Q53HA4,A6NHW7,Q6PI48,Q53T60,A8K8I1,Q75MN1,Q15046,O43776,P49590,P07814,O95363,P12081,Q3KQZ8,Q53GU6,Q9H5H1,P49591,Q496C9	1804	17	16659	7.60487	9.7119e-07	8.829e-08	7.35012e-07
INTERPRO	IPR004364:Aminoacyl-tRNA synthetase, class II (D, K and N)	5	0.262881	0.00062491	P14868,Q96I59,Q9H9M6,Q68CR9,Q6PI48,Q53T60,Q53R85,Q15046,O43776,A8K3J2,A8MSK1,Q53GU6,Q9H5H1,Q9NVT8,Q9HB23	1804	5	16659	9.23448	0.764017	0.0241774	1.08689
INTERPRO	IPR018150:Aminoacyl-tRNA synthetase, class II (D, K and N)-like	5	0.262881	0.00062491	P14868,Q96I59,Q9H9M6,Q68CR9,Q6PI48,Q53T60,Q53R85,Q15046,O43776,A8K3J2,A8MSK1,Q53GU6,Q9H5H1,Q9NVT8,Q9HB23	1804	5	16659	9.23448	0.764017	0.0241774	1.08689
PIR_SUPERFAMILY	PIRSF001525:lysine-tRNA ligase	5	0.262881	0.00134418	P14868,Q96I59,Q9H9M6,Q68CR9,Q6PI48,Q53T60,Q53R85,Q15046,O43776,A8K3J2,A8MSK1,Q53GU6,Q9H5H1,Q9NVT8,Q9HB23	976	5	7396	7.57787	0.693849	0.155573	2.06886
INTERPRO	IPR002312:Aspartyl-tRNA synthetase, class IIb	4	0.210305	0.00465315	Q53R85,O43776,A8K3J2,P14868,Q96I59,Q53GU6,Q9H9M6,Q9H5H1,Q9NVT8,Q68CR9,Q6PI48,Q53T60	1804	4	16659	9.23448	0.999979	0.123123	7.83025
INTERPRO	IPR004365:Nucleic acid binding, OB-fold, tRNA/helicase-type	6	0.315457	0.00608539	P27694,A8K0Y9,P14868,Q96I59,Q9H9M6,Q68CR9,Q6PI48,Q53T60,Q53R85,Q15046,O43776,A8K3J2,A8MSK1,Q53GU6,Q9H5H1,Q9NVT8,Q9HB23	1804	12	16659	4.61724	0.999999	0.149619	10.1216
GOTERM_BP_FAT	GO:0006422~aspartyl-tRNA aminoacylation	4	0.210305	0.0061318	Q53R85,O43776,A8K3J2,P14868,Q96I59,Q53GU6,Q9H9M6,Q9H5H1,Q9NVT8,Q68CR9,Q6PI48,Q53T60	1611	4	13528	8.39727	1	0.0812723	10.7215
GOTERM_MF_FAT	GO:0004815~aspartate-tRNA ligase activity	4	0.210305	0.00672344	Q53R85,O43776,A8K3J2,P14868,Q96I59,Q53GU6,Q9H9M6,Q9H5H1,Q9NVT8,Q68CR9,Q6PI48,Q53T60	1596	4	12983	8.13471	0.999801	0.098691	10.3948
Annotation Cluster 59	Enrichment Score: 3.408439851564072
Category	Term	Count	%	PValue	Genes	List Total	Pop Hits	Pop Total	Fold Enrichment	Bonferroni	Benjamini	FDR
SMART	SM00293:PWWP	10	0.525762	0.000143616	A2A2T3,Q2HXV9,P52701,Q2HXV8,Q2HXV7,A7MCZ1,Q2HXV5,Q3SWU9,O96028,Q8TCM6,O95696,Q659H0,Q59G93,Q5CZ83,P51858,Q5JV90,Q2HXV3,Q2HXV4,Q7Z4V5,Q2HXV1,Q9BZ95,Q2HXV2,Q9BW08,A6NJE2,Q5SZ07,Q5SZ08,Q1L838,Q9ULU4,Q8N4T7,Q9ULD4,Q59H67,Q7Z6E0,Q49A26,Q86X06,Q5TH08,Q9Y4Q3,Q96GI5,Q5TH12,Q5TH11,Q17RB6,Q2HXW0,Q569J9,Q2HXW1,Q2HXW2,Q8TE92,P55201	909	22	9079	4.53995	0.0407962	0.0024471	0.190754
INTERPRO	IPR000313:PWWP	10	0.525762	0.000266807	A2A2T3,Q2HXV9,P52701,Q2HXV8,Q2HXV7,A7MCZ1,Q2HXV5,Q3SWU9,O96028,Q8TCM6,O95696,Q659H0,Q59G93,Q5CZ83,P51858,Q5JV90,Q2HXV3,Q2HXV4,Q7Z4V5,Q2HXV1,Q9BZ95,Q2HXV2,Q9BW08,A6NJE2,Q5SZ07,Q5SZ08,Q1L838,Q9ULU4,Q8N4T7,Q9ULD4,Q59H67,Q7Z6E0,Q49A26,Q86X06,Q5TH08,Q9Y4Q3,Q96GI5,Q5TH12,Q5TH11,Q17RB6,Q2HXW0,Q569J9,Q2HXW1,Q2HXW2,Q8TE92,P55201	1804	22	16659	4.19749	0.460119	0.0139116	0.46542
UP_SEQ_FEATURE	domain:PWWP	8	0.42061	0.00155339	Q2HXV9,Q2HXV8,P52701,Q2HXV7,Q2HXV5,Q3SWU9,Q8TCM6,O95696,Q659H0,Q59G93,Q5CZ83,P51858,Q5JV90,Q2HXV3,Q2HXV4,Q7Z4V5,Q2HXV1,Q2HXV2,Q9BW08,A6NJE2,Q5SZ07,Q5SZ08,Q1L838,Q9ULU4,Q8N4T7,Q9ULD4,Q59H67,Q7Z6E0,Q49A26,Q86X06,Q5TH08,Q9Y4Q3,Q96GI5,Q5TH12,Q5TH11,Q17RB6,Q569J9,Q2HXW0,Q2HXW1,Q2HXW2,Q8TE92,P55201	1886	19	19113	4.26701	0.998645	0.093864	2.86585
Annotation Cluster 60	Enrichment Score: 3.357312536261031
Category	Term	Count	%	PValue	Genes	List Total	Pop Hits	Pop Total	Fold Enrichment	Bonferroni	Benjamini	FDR
GOTERM_BP_FAT	GO:0006635~fatty acid beta-oxidation	15	0.788644	8.55781e-07	A8K512,P49748,P51659,P43155,Q16698,Q53T69,P42126,Q96DC0,Q5T952,A8K6Y3,P11310,Q7LDK6,P23786,Q59H27,A8K745,Q9T2V8,Q6FHI2,Q53HR2,Q58EZ5,Q08426,Q53G79,Q9UQC5,Q13011,Q5T4U4,Q53TA2,Q9UBA4,Q5T4U5,Q9BUT1,P30084,P55084,P40939,Q7Z3W5,Q15067,Q5HYG7,O14734	1611	28	13528	4.49854	0.0031793	3.09157e-05	0.00157792
GOTERM_BP_FAT	GO:0019395~fatty acid oxidation	16	0.84122	1.96744e-05	A8K512,P51659,P49748,P43155,Q16698,Q53T69,A8MTQ6,P42126,Q96E92,Q96DC0,Q5T952,A8K6Y3,P11310,Q7LDK6,P23786,Q59H27,A8K745,Q9T2V8,Q6FHI2,Q53HR2,Q58EZ5,Q08426,Q13131,Q53G79,Q9UQC5,Q53TA2,Q5T4U4,Q86VS1,Q13011,Q9UBA4,Q5T4U5,Q9BUT1,P30084,P40939,P55084,Q7Z3W5,Q15067,Q5HYG7,O14734	1611	39	13528	3.44503	0.0705934	0.00051182	0.0362704
GOTERM_BP_FAT	GO:0034440~lipid oxidation	16	0.84122	1.96744e-05	A8K512,P51659,P49748,P43155,Q16698,Q53T69,A8MTQ6,P42126,Q96E92,Q96DC0,Q5T952,A8K6Y3,P11310,Q7LDK6,P23786,Q59H27,A8K745,Q9T2V8,Q6FHI2,Q53HR2,Q58EZ5,Q08426,Q13131,Q53G79,Q9UQC5,Q53TA2,Q5T4U4,Q86VS1,Q13011,Q9UBA4,Q5T4U5,Q9BUT1,P30084,P40939,P55084,Q7Z3W5,Q15067,Q5HYG7,O14734	1611	39	13528	3.44503	0.0705934	0.00051182	0.0362704
GOTERM_BP_FAT	GO:0030258~lipid modification	22	1.15668	3.16333e-05	P49748,A8K512,Q9NTJ5,Q7LA14,A8MTQ6,P42126,Q4LE69,Q96E92,Q5T952,A8K6Y3,P27986,Q7LDK6,Q59H27,Q96AX7,Q9T2V8,Q6FHI2,Q96Q15,Q53HR2,Q58EZ5,Q08426,Q7LA22,A8K527,Q13011,Q86VS1,Q53TA2,P42356,Q9BUT1,P60484,Q7Z3W5,Q5HYG7,Q15067,P51659,P43155,Q16698,Q53T69,O94935,A4D1U5,Q96DC0,Q53H12,P11310,P23786,Q75KN0,A8K745,Q13131,Q53G79,Q9UQC5,Q5T4U4,Q9UBA4,Q5T4U5,Q68D59,P30084,P55084,P40939,O14734	1611	69	13528	2.67739	0.111046	0.000774103	0.0583111
GOTERM_BP_FAT	GO:0009062~fatty acid catabolic process	15	0.788644	3.21226e-05	A8K512,P49748,P51659,P43155,Q16698,Q53T69,P42126,Q96DC0,Q5T952,A8K6Y3,P11310,Q7LDK6,P23786,Q59H27,A8K745,Q9T2V8,Q6FHI2,Q53HR2,Q58EZ5,Q08426,Q53G79,Q9UQC5,Q13011,Q5T4U4,Q53TA2,Q9UBA4,Q5T4U5,Q9BUT1,P30084,P55084,P40939,Q7Z3W5,Q15067,Q5HYG7,O14734	1611	36	13528	3.49886	0.112663	0.000780938	0.0592128
KEGG_PATHWAY	hsa00071:Fatty acid metabolism	18	0.946372	5.16601e-05	A8K512,P24752,P49748,Q53T69,P42126,Q9NYD2,P11766,Q96DC0,P45954,Q6IRT1,Q53HG3,A8K6Y3,P11310,Q7L124,Q4W5B4,Q5U043,P23786,Q9BWD1,Q9T2V8,Q53HR2,Q58EZ5,Q08426,O75521,Q53G79,P42765,Q9UQC5,Q53TA2,Q5T4U4,Q8TAF6,Q6FI45,Q59GW6,Q53GC8,Q5T4U5,Q6IBN4,Q5SQN6,P49189,Q96FG8,P30084,Q5JYK7,P40939,P55084,Q59E94,Q7Z3W5,Q16836,O60488,Q15067,Q5HYG7	808	40	5085	2.83199	0.0087952	0.000679316	0.0630686
GOTERM_BP_FAT	GO:0006631~fatty acid metabolic process	44	2.31335	5.87962e-05	A8K512,Q7RU04,A8K6I5,P42126,Q59ES1,Q1KLZ6,P34913,Q5T952,A8K6Y3,Q9H4A4,Q7L124,Q4W5B4,P54619,Q59H27,Q9T2V8,Q6FHI2,Q8N3W6,Q53EK4,Q8NCK6,Q59GY7,Q8N3W7,Q49AK0,Q53HE2,Q8N7V9,Q53TA2,Q86VS1,Q13011,O15228,Q9UGJ0,Q59FY4,Q9BUT1,Q96CM8,Q16836,O60488,Q15067,Q5HYG7,P51659,P43155,A5Z1R8,Q53T69,Q7M4N1,Q86TX2,Q96DC0,Q4LE83,P11310,A8K7D0,A8K745,A8K4J8,Q13587,Q13131,P60174,P51649,P42765,Q5T4U4,P49327,Q53GC8,Q8WW55,…	1611	198	13528	1.86606	0.196507	0.001358	0.108356
SP_PIR_KEYWORDS	fatty acid metabolism	18	0.946372	7.06571e-05	A8K512,P49748,P51659,P43155,Q53T69,P42126,Q96DC0,P45954,Q5T952,A8K6Y3,P11310,Q4W5B4,P23786,Q59H27,A8K745,A8K4J8,Q9T2V8,Q53HR2,Q58EZ5,Q08426,Q8N2F7,Q53G79,Q4G176,P42765,Q9UQC5,Q13011,Q5T4U4,Q53TA2,Q8TAF6,Q9UBA4,Q5T4U5,Q6INA0,Q6P2C7,Q5SQN6,P30084,P55084,P40939,Q96CM8,Q7Z3W5,Q16836,O60488,Q15067,Q9H7G2,Q5HYG7	1895	62	19235	2.94689	0.0438095	0.000581625	0.105091
GOTERM_BP_FAT	GO:0016054~organic acid catabolic process	29	1.52471	7.71601e-05	A8K512,P49748,P00367,P42126,Q53RX0,Q93099,P11586,Q96G95,Q68D38,Q5T952,A8K6Y3,Q7LDK6,Q53S89,Q53TX0,Q59H27,Q9T2V8,O43708,Q6FHI2,Q53HR2,Q58EZ5,Q08426,Q53TA2,Q13011,Q8WW71,P49448,P49590,Q6NVY1,Q9BUT1,Q7Z3W5,Q496C9,Q15067,Q5HYG7,P51659,P43155,Q16698,Q6LCK9,Q53T69,A4D0W4,Q53GW3,A8K5X5,Q9BQL0,P00505,Q8TEA8,Q96DC0,Q9BSD0,O15382,P11310,A8MY43,P23786,A8K745,Q14400,Q53EW7,A6NED0,Q6FGL4,O94925,Q53G79,Q9UQC5,…	1611	111	13528	2.19388	0.249581	0.00171783	0.142176
GOTERM_BP_FAT	GO:0046395~carboxylic acid catabolic process	29	1.52471	7.71601e-05	A8K512,P49748,P00367,P42126,Q53RX0,Q93099,P11586,Q96G95,Q68D38,Q5T952,A8K6Y3,Q7LDK6,Q53S89,Q53TX0,Q59H27,Q9T2V8,O43708,Q6FHI2,Q53HR2,Q58EZ5,Q08426,Q53TA2,Q13011,Q8WW71,P49448,P49590,Q6NVY1,Q9BUT1,Q7Z3W5,Q496C9,Q15067,Q5HYG7,P51659,P43155,Q16698,Q6LCK9,Q53T69,A4D0W4,Q53GW3,A8K5X5,Q9BQL0,P00505,Q8TEA8,Q96DC0,Q9BSD0,O15382,P11310,A8MY43,P23786,A8K745,Q14400,Q53EW7,A6NED0,Q6FGL4,O94925,Q53G79,Q9UQC5,…	1611	111	13528	2.19388	0.249581	0.00171783	0.142176
GOTERM_BP_FAT	GO:0044242~cellular lipid catabolic process	19	0.998948	0.00297883	P49748,A8K512,Q13828,P04114,P42126,A8K6Y3,Q5T952,Q7LDK6,Q59H27,Q9T2V8,Q6FHI2,Q53HR2,Q58EZ5,Q08426,Q9UE52,Q9UE51,Q59HB3,Q9UE53,Q13011,Q53TA2,Q4ZG63,Q9BUT1,Q7Z3W5,Q5HYG7,Q15067,Q13789,P51659,P43155,Q16698,Q53T69,Q7Z7Q0,P78482,Q96DC0,P30041,Q53QC8,P11310,P23786,O95470,A8K745,Q9NXE4,Q53G79,Q9UQC5,A8JZY7,Q5T4U4,Q9UBA4,Q5T4U5,P30084,P55084,P40939,O14734	1611	76	13528	2.09932	0.999985	0.0444756	5.35217
SP_PIR_KEYWORDS	lipid metabolism	24	1.26183	0.0230164	A8K512,P49748,Q13828,P04114,P52895,P42126,P45954,Q5T952,A8K6Y3,Q4W5B4,Q59H27,Q9T2V8,Q53HR2,Q58EZ5,Q08426,Q9UE52,Q9UE51,Q59HB3,Q9UE53,Q13011,Q53TA2,Q8TAF6,Q4ZG63,Q59GU2,Q5SR16,Q6P2C7,Q96CM8,P60484,Q7Z3W5,Q16836,O60488,Q5HYG7,Q15067,Q13789,P51659,P43155,Q53T69,Q7Z7Q0,Q7M4N1,P78482,Q96DC0,Q53QC8,P11310,Q14CJ7,P23786,O95470,A8K745,A8K4J8,P50226,P50225,A8K2N9,Q8N2F7,Q53G79,Q4G176,P42765,Q9UQC5,Q5T4U4,…	1895	151	19235	1.61331	1	0.101454	29.2842
COG_ONTOLOGY	Lipid metabolism	14	0.736067	0.0385118	A8K512,P49748,P42126,Q9NYD2,Q96DC0,P45954,Q53HG3,Q9H845,P11310,Q7L124,Q4W5B4,A8K745,Q53HR2,O75521,Q5T4U4,Q13011,Q8TAF6,Q53GC8,Q9H9W4,Q49A26,Q5T4U5,Q6IBN4,Q9BUX5,Q13085,Q6NVY1,Q5SQN6,Q59FY4,P30084,Q5JYK7,P55809,Q59E94,Q59FN3,Q16836,O60488,Q5HYG7,Q6IAV5,Q7Z5W8	237	64	1950	1.79984	0.775162	0.311399	29.8773
GOTERM_BP_FAT	GO:0009063~cellular amino acid catabolic process	14	0.736067	0.0556652	P00367,Q6LCK9,A4D0W4,Q53GW3,Q53RX0,A8K5X5,P00505,Q9BQL0,Q93099,Q8TEA8,P11586,Q96G95,Q9BSD0,Q68D38,O15382,A8MY43,Q53TX0,Q53S89,O43708,Q53EW7,Q14400,A6NED0,Q6FGL4,O94925,P34896,P21953,O14874,Q8WW71,Q9UDR5,P49448,P49590,Q6NVY1,Q9UQV0,Q496C9	1611	68	13528	1.72885	1	0.427591	65.2176
GOTERM_BP_FAT	GO:0009310~amine catabolic process	15	0.788644	0.0751296	P00367,Q6LCK9,A4D0W4,Q53GW3,Q53RX0,A8K5X5,Q9BQL0,P00505,Q93099,Q8TEA8,P11586,Q96G95,Q9BSD0,Q68D38,O15382,A8MY43,Q53TX0,Q53S89,O43708,Q53EW7,Q14400,A6NED0,A8MPV9,Q6FGL4,O94925,P34896,P21953,O14874,Q8WW71,Q9UDR5,P49448,P49590,Q6NVY1,Q9UQV0,Q496C9	1611	78	13528	1.61486	1	0.517301	76.3091
GOTERM_BP_FAT	GO:0016042~lipid catabolic process	23	1.20925	0.403983	A8K512,P49748,Q13828,P04114,P42126,P43034,Q9H4N8,Q5T952,A8K6Y3,Q7LDK6,Q59H27,Q9T2V8,Q6FHI2,Q53HR2,Q58EZ5,Q08426,Q9UE52,Q9UE51,Q59HB3,Q9UE53,Q13011,Q53TA2,Q4ZG63,Q05GC6,Q9BUT1,Q05GC8,Q7Z3W5,Q15067,Q5HYG7,Q13789,P51659,P43155,Q16698,Q53T69,Q7Z7Q0,P78482,Q96DC0,P30041,Q53QC8,P11310,Q96PN7,P23786,O95470,A8K745,Q9NXE4,Q5SY02,Q5SY00,Q53G79,Q9UQC5,Q5T4U4,A8JZY7,Q9UBA4,Q5T4U5,Q99487,P30084,P55084,P40939,…	1611	173	13528	1.1164	1	0.965485	99.9928
Annotation Cluster 61	Enrichment Score: 3.343353936094893
Category	Term	Count	%	PValue	Genes	List Total	Pop Hits	Pop Total	Fold Enrichment	Bonferroni	Benjamini	FDR
GOTERM_BP_FAT	GO:0043603~cellular amide metabolic process	21	1.1041	3.2479e-06	Q9NUZ0,Q75MT9,Q9P1G4,A8K6I5,Q1KLZ6,P42229,Q9UMF8,Q6FHQ6,Q6P3S4,Q2VF42,Q9UIC5,Q86TQ8,Q2Q9B7,P36957,A8K414,P49715,Q6LEQ7,Q86SW4,Q5T6L5,Q5T6L4,P40925,P40926,Q59GY7,Q0PHS1,Q53HE2,Q0PHS4,O43837,P48163,Q16187,Q6FHZ0,Q53FA7,Q53GF8,Q6FI37,P11413,P52209,Q75MP7,Q2QD09,Q5T6L6,Q6IBS5,Q0QF37,Q7LDY7,Q0QER2,P09622,Q7Z3V0,P00491,O95336,P51692,Q567U4,Q86TW7,Q8NFZ7,A7LNP2,Q05CA4,P60174,Q8WVX2,Q6FIA4,P37837,P00966,…	1611	56	13528	3.14898	0.0120127	0.000101553	0.00598848
GOTERM_BP_FAT	GO:0006769~nicotinamide metabolic process	16	0.84122	2.80376e-05	Q9NUZ0,Q75MT9,Q9P1G4,Q9UMF8,Q6FHQ6,Q2VF42,Q9UIC5,Q2Q9B7,Q86TQ8,P36957,A8K414,Q6LEQ7,Q86SW4,P40925,P40926,Q0PHS1,Q53HE2,O43837,Q0PHS4,P48163,Q16187,Q6FHZ0,Q53FA7,Q53GF8,Q6FI37,P11413,P52209,Q75MP7,Q2QD09,Q6IBS5,Q0QF37,Q7LDY7,Q0QER2,Q7Z3V0,P00491,O95336,Q567U4,Q86TW7,P37837,Q6FIA4,Q8WVX2,P60174,P07195,Q49A26,Q2Q9H2,Q6FHP9,O75874,P50213,Q5U077	1611	40	13528	3.35891	0.0990716	0.000690685	0.0516847
GOTERM_BP_FAT	GO:0046496~nicotinamide nucleotide metabolic process	16	0.84122	2.80376e-05	Q9NUZ0,Q75MT9,Q9P1G4,Q9UMF8,Q6FHQ6,Q2VF42,Q9UIC5,Q2Q9B7,Q86TQ8,P36957,A8K414,Q6LEQ7,Q86SW4,P40925,P40926,Q0PHS1,Q53HE2,O43837,Q0PHS4,P48163,Q16187,Q6FHZ0,Q53FA7,Q53GF8,Q6FI37,P11413,P52209,Q75MP7,Q2QD09,Q6IBS5,Q0QF37,Q7LDY7,Q0QER2,Q7Z3V0,P00491,O95336,Q567U4,Q86TW7,P37837,Q6FIA4,Q8WVX2,P60174,P07195,Q49A26,Q2Q9H2,Q6FHP9,O75874,P50213,Q5U077	1611	40	13528	3.35891	0.0990716	0.000690685	0.0516847
GOTERM_BP_FAT	GO:0009820~alkaloid metabolic process	16	0.84122	3.93827e-05	Q9NUZ0,Q75MT9,Q9P1G4,Q9UMF8,Q6FHQ6,Q2VF42,Q9UIC5,Q2Q9B7,Q86TQ8,P36957,A8K414,Q6LEQ7,Q86SW4,P40925,P40926,Q0PHS1,Q53HE2,O43837,Q0PHS4,P48163,Q16187,Q6FHZ0,Q53FA7,Q53GF8,Q6FI37,P11413,P52209,Q75MP7,Q2QD09,Q6IBS5,Q0QF37,Q7LDY7,Q0QER2,Q7Z3V0,P00491,O95336,Q567U4,Q86TW7,P37837,Q6FIA4,Q8WVX2,P60174,P07195,Q49A26,Q2Q9H2,Q6FHP9,O75874,P50213,Q5U077	1611	41	13528	3.27698	0.136314	0.000945011	0.072591
GOTERM_BP_FAT	GO:0019362~pyridine nucleotide metabolic process	16	0.84122	5.4573e-05	Q9NUZ0,Q75MT9,Q9P1G4,Q9UMF8,Q6FHQ6,Q2VF42,Q9UIC5,Q2Q9B7,Q86TQ8,P36957,A8K414,Q6LEQ7,Q86SW4,P40925,P40926,Q0PHS1,Q53HE2,O43837,Q0PHS4,P48163,Q16187,Q6FHZ0,Q53FA7,Q53GF8,Q6FI37,P11413,P52209,Q75MP7,Q2QD09,Q6IBS5,Q0QF37,Q7LDY7,Q0QER2,Q7Z3V0,P00491,O95336,Q567U4,Q86TW7,P37837,Q6FIA4,Q8WVX2,P60174,P07195,Q49A26,Q2Q9H2,Q6FHP9,O75874,P50213,Q5U077	1611	42	13528	3.19896	0.18378	0.00127637	0.100577
SP_PIR_KEYWORDS	pentose phosphate pathway	6	0.315457	0.000163119	P37837,P60174,Q0PHS1,P04075,Q53HE2,Q0PHS4,Q2Q9H2,Q9UCN2,Q9UMF8,Q6FHP9,P09972,P52209,P11413,Q2VF42,Q6FI10,Q2Q9B7,Q2QD09	1895	7	19235	8.70034	0.098257	0.0012019	0.242456
GOTERM_BP_FAT	GO:0006739~NADP metabolic process	9	0.473186	0.000210409	Q0QER2,Q9UMF8,Q7Z3V0,Q6FHQ6,O95336,Q567U4,Q2VF42,Q2Q9B7,P60174,Q6FIA4,Q8WVX2,P37837,Q0PHS1,Q53HE2,Q0PHS4,P48163,Q49A26,Q2Q9H2,Q6FHP9,Q53FA7,O75874,Q6FI37,P52209,P11413,Q2QD09	1611	16	13528	4.72346	0.542974	0.00429304	0.387253
GOTERM_BP_FAT	GO:0006733~oxidoreduction coenzyme metabolic process	16	0.84122	0.000783455	Q9NUZ0,Q75MT9,Q9P1G4,Q9UMF8,Q6FHQ6,Q2VF42,Q9UIC5,Q2Q9B7,Q86TQ8,P36957,A8K414,Q6LEQ7,Q86SW4,P40925,P40926,Q0PHS1,Q53HE2,O43837,Q0PHS4,P48163,Q16187,Q6FHZ0,Q53FA7,Q53GF8,Q6FI37,P11413,P52209,Q75MP7,Q2QD09,Q6IBS5,Q0QF37,Q7LDY7,Q0QER2,Q7Z3V0,P00491,O95336,Q567U4,Q86TW7,P37837,Q6FIA4,Q8WVX2,P60174,P07195,Q49A26,Q2Q9H2,Q6FHP9,O75874,P50213,Q5U077	1611	52	13528	2.58378	0.945871	0.0144046	1.43475
GOTERM_BP_FAT	GO:0019748~secondary metabolic process	20	1.05152	0.00191439	Q9NUZ0,Q75MT9,Q9P1G4,P54259,Q86V38,Q9UMF8,Q6FHQ6,Q2VF42,Q9UIC5,Q86TQ8,Q2Q9B7,P36957,A8K414,Q6LEQ7,Q86SW4,P40925,P40926,Q0PHS1,Q53HE2,O43837,Q0PHS4,P48163,Q16187,Q6FHZ0,Q53FA7,Q53GF8,Q6FI37,P11413,P52209,Q75MP7,Q0QD40,Q2QD09,Q6IBS5,Q8TC12,Q0QF37,Q7LDY7,Q0QER2,P11766,Q6IRT1,Q7Z3V0,P00491,Q13907,A8K062,O95336,A6NDK3,Q5U043,Q567U4,Q86TW7,Q6FIA4,P37837,Q8WVX2,P60174,Q6FI45,P07195,Q49A26,Q2Q9H2,Q6IAH5,…	1611	79	13528	2.12589	0.999199	0.0309227	3.47155
GOTERM_BP_FAT	GO:0006098~pentose-phosphate shunt	6	0.315457	0.00197663	P60174,P37837,Q0PHS1,Q53HE2,Q0PHS4,Q49A26,Q2Q9H2,Q9UMF8,Q6FHP9,O95336,P52209,P11413,Q2VF42,Q2Q9B7,Q2QD09	1611	9	13528	5.59818	0.999365	0.0317751	3.58248
SP_PIR_KEYWORDS	pentose shunt	3	0.157729	0.0271664	P37837,P60174,P52209,Q53HE2,Q2QD09,Q9UMF8,Q6FHP9	1895	3	19235	10.1504	1	0.11571	33.6247
GOTERM_BP_FAT	GO:0019321~pentose metabolic process	5	0.262881	0.0331338	P37837,A8K516,Q0PHS1,Q0PHS4,Q53FW2,Q2Q9H2,Q9UMF8,P60891,P52209,P11413,Q2VF42,Q2Q9B7,Q9UKK9	1611	11	13528	3.81694	1	0.296854	46.2749
GOTERM_BP_FAT	GO:0019674~NAD metabolic process	7	0.368034	0.068421	Q6IBS5,Q86SW4,Q9NUZ0,Q75MT9,P40925,Q9P1G4,P40926,Q0QF37,Q7LDY7,O43837,P07195,Q16187,Q6FHZ0,P00491,Q53GF8,Q86TW7,Q9UIC5,P50213,Q86TQ8,Q75MP7,P36957,Q5U077,A8K414,Q6LEQ7	1611	25	13528	2.35124	1	0.487958	72.932
Annotation Cluster 62	Enrichment Score: 3.2684416340199705
Category	Term	Count	%	PValue	Genes	List Total	Pop Hits	Pop Total	Fold Enrichment	Bonferroni	Benjamini	FDR
SP_PIR_KEYWORDS	methylated amino acid	13	0.683491	4.76025e-08	Q6DRA9,Q1KLZ0,Q9UE89,A8K4Z8,P60709,Q8WVW5,Q96DE1,Q562S2,Q562S0,Q0VAS5,P10412,Q6TXQ4,Q562V5,Q562N8,Q562R8,Q562N0,Q562Z7,Q562Z6,P09651,Q562Z4,Q562N2,Q6FGB8,Q7Z7J6,Q53G99,Q96HG5,A8K7C2,P22087,Q562M5,Q5T8M9,Q96BS4,Q3MIB7,Q562M3,A3R0T8,P62736,Q6PJ43,A5PLR1,Q71DI3,P62158,P84243,Q562L9,A6NFS4,Q53GK6,Q9BRL5,Q562L6,Q562P0,Q562L5,P68032,Q4VB24,Q5T9N7,P62805,Q562X9,Q6NWP7,Q6IPF2,Q0VAC0,Q53G76,Q96FU6,P20671,…	1895	20	19235	6.59776	3.01795e-05	5.58888e-07	7.08354e-05
PIR_SUPERFAMILY	PIRSF002337:Actin	9	0.473186	0.000715888	Q1KLZ0,Q9UE89,Q8IY98,P60709,Q8WVW5,Q96DE1,Q562S2,Q562S0,Q562V5,Q562N8,Q562R2,Q562R8,Q562N0,Q562Z7,Q562Z6,Q562Z4,Q562N2,Q7Z7J6,Q53G99,Q562R1,Q96HG5,A8K7C2,Q562M5,Q5T8M9,P61158,Q562M3,Q53QM2,P62736,Q6PJ43,Q562S9,Q59FV6,Q562L9,Q53GK6,P61160,Q562L6,Q562L5,Q562P0,P68032,Q5T9N7,Q562X8,Q562X9,Q53G76,Q96FU6,Q562U1,Q562U2,P63261,Q13707,P68133,Q562Y6,Q562Y8,P63267	976	17	7396	4.01181	0.467519	0.0997066	1.10687
INTERPRO	IPR004001:Actin, conserved site	7	0.368034	0.004889	P62736,Q6PJ43,Q9UE89,Q1KLZ0,Q8WVW5,P60709,Q96DE1,Q562S2,Q562S9,Q562S0,Q562N8,Q562V5,Q562R2,Q562L9,Q53GK6,Q562R8,Q562L6,Q562P0,Q562L5,P68032,Q562N0,Q562Z7,Q562Z6,Q562Z4,Q5T9N7,Q562N2,Q562X8,Q562X9,Q7Z7J6,Q53G99,Q53G76,Q96FU6,Q562R1,Q96HG5,A8K7C2,Q562M5,Q5T8M9,Q562U1,Q562U2,Q13707,P63261,P68133,Q562Y6,P63267,Q562Y8,Q562M3	1804	16	16659	4.04008	0.999988	0.124703	8.21132
SMART	SM00268:ACTIN	10	0.525762	0.0129702	Q1KLZ0,Q9UE89,Q8IY98,P60709,Q8WVW5,Q96DE1,Q562S2,Q562S0,Q562V5,Q562N8,Q562R2,Q562R8,Q562N0,Q562Z7,Q562Z6,Q562Z4,Q562N2,Q9GZN1,Q7Z7J6,Q53G99,Q562R1,Q96HG5,A8K7C2,Q562M5,Q5T8M9,P61158,Q562M3,Q53QM2,P62736,Q6PJ43,Q7Z4D2,Q562S9,Q59FV6,Q562L9,Q53GK6,P61160,Q562L6,Q562L5,Q562P0,P68032,Q5T9N7,Q562X8,Q562X9,Q53G76,Q96FU6,Q562U1,Q562U2,P63261,Q13707,Q53GH2,P68133,Q562Y6,Q562Y8,P63267	909	39	9079	2.561	0.977313	0.105376	15.9327
INTERPRO	IPR004000:Actin/actin-like	10	0.525762	0.0210451	Q1KLZ0,Q9UE89,Q8IY98,P60709,Q8WVW5,Q96DE1,Q562S2,Q562S0,Q562V5,Q562N8,Q562R2,Q562R8,Q562N0,Q562Z7,Q562Z6,Q562Z4,Q562N2,Q9GZN1,Q7Z7J6,Q53G99,Q562R1,Q96HG5,A8K7C2,Q562M5,Q5T8M9,P61158,Q562M3,Q53QM2,P62736,Q6PJ43,Q7Z4D2,Q562S9,Q59FV6,Q562L9,Q53GK6,P61160,Q562L6,Q562L5,Q562P0,P68032,Q5T9N7,Q562X8,Q562X9,Q53G76,Q96FU6,Q562U1,Q562U2,P63261,Q13707,Q53GH2,P68133,Q562Y6,Q562Y8,P63267	1804	39	16659	2.36782	1	0.362858	31.054
Annotation Cluster 63	Enrichment Score: 3.2420974925913173
Category	Term	Count	%	PValue	Genes	List Total	Pop Hits	Pop Total	Fold Enrichment	Bonferroni	Benjamini	FDR
GOTERM_CC_FAT	GO:0000792~heterochromatin	16	0.84122	1.98959e-05	Q9UBB5,Q86UJ6,Q92769,Q5STK9,Q13185,Q59FZ6,Q8WTY5,P51532,P84243,Q6TXQ4,Q17RS0,Q92922,A4D177,Q69YZ5,Q86U63,Q13263,Q9P0M6,Q53F85,P16104,Q02880,Q05BW5,Q9UIG0,P17987,P46100,Q6W6M6,Q6P1K4,Q71UH4,Q6LC06,O95983,A8K4B7,Q59H80,A7E2E1,Q9HA11,Q05CR1,P51608,Q9UER7,Q9HBD4,Q6LBI8,Q58EY4,Q59FJ6	1438	41	12782	3.46877	0.0129474	0.000188851	0.0297333
GOTERM_CC_FAT	GO:0000790~nuclear chromatin	17	0.893796	0.000248641	P52701,Q92769,Q13185,Q96QC0,P68400,Q3SWU9,P84243,Q13547,Q6TXQ4,Q5HYD4,Q17RS0,Q5U065,Q09028,Q92922,A4D177,Q86U63,Q58F28,Q2L6I0,Q8NEV1,Q13263,Q9P0M6,P16104,Q2I0Y7,Q0VAE4,Q05BW5,Q1L838,Q96ST3,P17987,P46100,Q5U5J2,Q9UNS1,Q6IT96,Q9UBU8,Q9HA11,Q05CR1,Q58EY4	1438	55	12782	2.74743	0.150307	0.00216937	0.370986
GOTERM_CC_FAT	GO:0005720~nuclear heterochromatin	8	0.42061	0.0379639	Q05BW5,P17987,P46100,Q13185,P84243,Q6TXQ4,Q17RS0,Q9HA11,Q05CR1,Q92922,A4D177,Q86U63,Q58EY4,Q9P0M6,Q13263,P16104	1438	29	12782	2.45206	1	0.189018	43.9248
Annotation Cluster 64	Enrichment Score: 3.2041511286164055
Category	Term	Count	%	PValue	Genes	List Total	Pop Hits	Pop Total	Fold Enrichment	Bonferroni	Benjamini	FDR
GOTERM_BP_FAT	GO:0010605~negative regulation of macromolecule metabolic process	146	7.67613	2.14206e-10	Q8NF52,Q5JNW4,Q13573,O75496,Q86TQ3,Q6P3S4,Q0EF63,Q59F45,Q2Q9B7,Q0EF62,Q6VBB7,Q69YZ5,P28065,A2RU75,Q01105,Q56D06,A8K6F2,O95983,A6NJ42,Q6NW36,Q59FP7,P67775,Q59GP7,Q49A90,O75376,Q53XI7,A8K5E3,Q0ZAI9,Q96GV1,P27348,Q59GS3,P01106,A4D177,O75381,Q59EQ2,A8K6E5,Q3V793,Q5JNZ9,Q8TAQ2,Q6IT96,Q8WVK4,P26583,Q96C61,Q5T948,Q5T949,Q86WG4,P60228,Q76L81,Q6I9T8,Q2XN98,Q2TAM5,Q9Y6E3,P31946,A1XKG3,Q5VVH2,Q53S41,P31949,…	1611	734	13528	1.6703	7.97061e-07	1.24541e-08	3.94965e-07
GOTERM_BP_FAT	GO:0051172~negative regulation of nitrogen compound metabolic process	91	4.78444	0.000130975	P16989,Q13573,Q5T3R7,Q5T3R8,Q3SWU9,Q86V38,O75496,Q9H7Z6,Q53F64,Q6P3S4,Q96T37,Q59F45,Q0EF63,Q9UJU2,Q0EF62,Q2XSC7,Q6VBB7,Q69YZ5,P62854,P23396,Q6FHQ0,A8MPV9,A2RU75,Q5JVH5,Q00577,A8K6F2,Q56D06,O95983,Q59EB5,Q9UQL6,Q59FP7,O60315,Q59GP7,Q659G9,P26358,Q92794,Q19RW5,O75376,Q15596,Q53XI7,A8K5E3,Q0ZAI9,Q96GV1,Q96GD7,P27348,Q60F95,Q59GS3,Q60F94,A4D177,A7LNP2,O75381,Q59EQ2,Q5JNZ9,Q9NX34,Q8TAQ2,Q8WX92,Q29RF6,…	1611	519	13528	1.47235	0.385772	0.00276543	0.241223
GOTERM_BP_FAT	GO:0045934~negative regulation of nucleobase, nucleoside, nucleotide and nucleic acid metabolic process	89	4.67928	0.000210417	P16989,Q13573,Q5T3R7,Q5T3R8,Q3SWU9,Q86V38,O75496,Q9H7Z6,Q53F64,Q6P3S4,Q96T37,Q59F45,Q0EF63,Q9UJU2,Q0EF62,Q2XSC7,Q6VBB7,Q69YZ5,P62854,P23396,Q6FHQ0,A2RU75,Q5JVH5,Q00577,A8K6F2,Q56D06,O95983,Q59EB5,Q9UQL6,Q59FP7,O60315,Q59GP7,Q659G9,P26358,Q92794,Q19RW5,O75376,Q15596,Q53XI7,A8K5E3,Q0ZAI9,Q96GV1,Q96GD7,P27348,Q60F95,Q59GS3,Q60F94,A4D177,A7LNP2,O75381,Q59EQ2,Q5JNZ9,Q9NX34,Q8TAQ2,Q8WX92,Q29RF6,Q9UNS1,…	1611	512	13528	1.45968	0.542986	0.00426978	0.387266
GOTERM_BP_FAT	GO:0031327~negative regulation of cellular biosynthetic process	93	4.88959	0.000775065	Q8WVW9,P16989,Q13573,Q5T3R7,Q5T3R8,O75496,Q86V38,Q9H7Z6,Q53F64,Q6P3S4,Q96T37,Q59F45,Q0EF63,Q9UJU2,Q0EF62,Q2XSC7,Q69YZ5,Q6FHQ0,A2RU75,Q00577,A8K6F2,Q56D06,Q86VS1,Q8WTW0,O95983,Q59EB5,Q9UQL6,Q59FP7,O60315,Q59GP7,Q659G9,P26358,Q92794,Q19RW5,P17252,Q2TSD3,O75376,Q15596,Q53XI7,Q659G3,A8K5E3,Q96GV1,Q96GD7,P27348,Q60F95,Q59GS3,Q60F94,A4D177,A7LNP2,O75381,Q59EQ2,Q5JNZ9,Q8TAQ2,Q8WX92,Q29RF6,Q9UNS1,A6NHB0,…	1611	561	13528	1.39206	0.944153	0.0143221	1.41949
GOTERM_BP_FAT	GO:0009890~negative regulation of biosynthetic process	94	4.94217	0.00101844	Q8WVW9,P16989,Q13573,Q5T3R7,Q5T3R8,O75496,Q86V38,Q9H7Z6,Q53F64,Q6P3S4,Q96T37,Q59F45,Q0EF63,Q9UJU2,Q0EF62,Q2XSC7,Q69YZ5,Q6FHQ0,A2RU75,Q00577,A8K6F2,Q56D06,Q86VS1,Q8WTW0,O95983,Q59EB5,Q9UQL6,Q59FP7,O60315,Q6NR85,Q59GP7,Q659G9,P26358,Q92794,Q19RW5,P17252,Q2TSD3,O75376,Q15596,Q53XI7,Q659G3,A8K5E3,Q96GV1,Q96GD7,P27348,Q60F95,Q59GS3,Q60F94,A4D177,A7LNP2,O75381,Q59EQ2,Q5JNZ9,Q8TAQ2,Q8WX92,Q29RF6,Q9UNS1,…	1611	573	13528	1.37756	0.977439	0.0177256	1.86127
GOTERM_BP_FAT	GO:0010558~negative regulation of macromolecule biosynthetic process	90	4.73186	0.00120018	Q8WVW9,P16989,Q13573,Q5T3R7,Q5T3R8,Q86V38,O75496,Q9H7Z6,Q53F64,Q6P3S4,Q96T37,Q59F45,Q0EF63,Q9UJU2,Q0EF62,Q2XSC7,Q69YZ5,Q6FHQ0,A2RU75,Q00577,A8K6F2,Q56D06,Q8WTW0,O95983,Q59EB5,Q9UQL6,Q59FP7,O60315,Q59GP7,Q659G9,P26358,Q92794,Q19RW5,P17252,Q2TSD3,O75376,Q15596,Q53XI7,Q659G3,A8K5E3,Q96GV1,Q96GD7,P27348,Q60F95,Q59GS3,Q60F94,A4D177,A7LNP2,O75381,Q59EQ2,Q5JNZ9,Q8TAQ2,Q8WX92,Q29RF6,Q9UNS1,A6NHB0,Q6IT96,…	1611	547	13528	1.38163	0.988536	0.0204752	2.18995
GOTERM_BP_FAT	GO:0016481~negative regulation of transcription	76	3.99579	0.00251893	P16989,Q13573,Q86V38,Q9H7Z6,Q53F64,Q6P3S4,Q96T37,Q59F45,Q0EF63,Q9UJU2,Q2XSC7,Q0EF62,Q69YZ5,Q6FHQ0,A2RU75,A8K6F2,Q56D06,Q00577,O95983,Q59EB5,Q9UQL6,Q59FP7,O60315,Q59GP7,Q659G9,P26358,Q92794,Q19RW5,O75376,Q15596,Q53XI7,A8K5E3,Q96GV1,Q96GD7,P27348,Q59GS3,Q60F95,Q60F94,A4D177,A7LNP2,O75381,Q59EQ2,Q5JNZ9,Q8TAQ2,Q8WX92,Q29RF6,Q9UNS1,A6NHB0,Q6IT96,Q6FHP5,Q96T23,A7E2E1,P26583,Q9UCH6,Q86WG4,Q76L81,Q2XN98,…	1611	459	13528	1.3904	0.999916	0.0386644	4.54392
GOTERM_BP_FAT	GO:0010629~negative regulation of gene expression	81	4.25868	0.00406982	P16989,Q13573,Q86V38,Q9H7Z6,Q53F64,Q6P3S4,Q96T37,Q59F45,Q0EF63,Q9UJU2,Q0EF62,Q2XSC7,Q69YZ5,Q6FHQ0,A2RU75,Q00577,A8K6F2,Q56D06,O95983,Q59EB5,Q9UQL6,Q59FP7,O60315,Q59GP7,Q659G9,P26358,Q92794,Q19RW5,O75376,Q15596,Q53XI7,A8K5E3,Q96GV1,Q96GD7,P27348,Q60F95,Q59GS3,Q60F94,P01106,A4D177,A7LNP2,O75381,Q59EQ2,Q5JNZ9,Q8TAQ2,Q8WX92,Q29RF6,Q9UNS1,A6NHB0,Q6IT96,Q6FHP5,Q96T23,A7E2E1,P26583,Q9UCH6,Q86WG4,Q76L81,…	1611	504	13528	1.34956	1	0.0582158	7.24372
GOTERM_MF_FAT	GO:0016564~transcription repressor activity	55	2.89169	0.00714447	Q12906,Q59EJ8,Q5JSM0,Q69YR9,Q6NXQ0,Q5JSM1,P16989,P54259,Q13573,Q6LE77,Q53FN0,P84022,A8K001,Q86V38,Q4VY19,Q6PKI6,P35251,P49711,Q59F45,Q69YZ5,Q6FHQ0,Q6LE81,P06400,Q7KZ24,Q6LE80,Q9BT62,Q7Z7J0,A2RU75,Q9BT61,Q6W2J9,Q56D06,A8K6F2,A8K9K2,Q8N2W9,Q59EB5,Q6LE82,Q8NAK9,Q9UQL6,Q6LE79,P67809,Q59GP7,Q59HH0,Q5TZP7,Q6DUF0,Q0D2M5,Q86W55,Q86YY2,O75376,Q86YY1,Q15596,Q9ULA6,Q4FD37,Q9UMX1,Q53XI7,A8K5E3,Q96GV1,Q96GD7,…	1596	316	12983	1.41585	0.999883	0.103365	11.0108
GOTERM_BP_FAT	GO:0051253~negative regulation of RNA metabolic process	60	3.15457	0.00720062	P16989,Q86V38,Q53F64,Q6P3S4,Q96T37,Q0EF63,Q59F45,Q2XSC7,Q0EF62,Q9UJU2,Q69YZ5,P62854,Q6FHQ0,Q5JVH5,A8K6F2,Q56D06,Q00577,O95983,Q59EB5,Q9UQL6,Q59FP7,Q59GP7,Q659G9,P26358,Q19RW5,O75376,Q15596,Q53XI7,Q96GV1,A8K5E3,Q96GD7,P27348,A4D177,A7LNP2,O75381,Q5JNZ9,Q9NX34,Q8TAQ2,Q29RF6,A6NHB0,Q6IT96,Q96T23,A7E2E1,Q9UCH6,Q86WG4,Q2XN98,O94992,Q53S41,Q59GM0,Q68DJ2,Q53FT9,Q1MSW8,Q5U0P9,Q5JP00,Q9H5E0,A8K4B7,A8K4B6,…	1611	362	13528	1.39181	1	0.0915699	12.4753
GOTERM_BP_FAT	GO:0045892~negative regulation of transcription, DNA-dependent	57	2.99685	0.0171545	A4KYM4,Q12906,P51531,A4KYM6,Q59EJ8,P16989,P54259,Q6LE77,P84022,Q12830,A8K001,P51532,Q86V38,Q53F64,Q6P3S4,Q96T37,P49711,Q59F45,Q0EF63,Q9UJU2,Q0EF62,Q2XSC7,Q69YZ5,P49715,Q6FHQ0,Q6LE81,P06400,Q6LE80,Q9BT62,Q7Z7J0,Q9BT61,Q6W2J9,Q00577,Q56D06,A8K6F2,Q8N2W9,O95983,Q59EB5,Q53GA5,Q6LE82,Q99729,Q9UQL6,Q6LE79,Q59FP7,Q4V760,Q59GP7,Q59HH0,Q6DUF0,Q4VBQ6,Q86VW9,Q659G9,P26358,Q19RW5,Q86YY2,O75376,Q86YY1,Q15596,…	1611	356	13528	1.34451	1	0.183811	27.3159
GOTERM_BP_FAT	GO:0000122~negative regulation of transcription from RNA polymerase II promoter	41	2.15563	0.0701552	P51531,Q59EJ8,P16989,P54259,Q6LE77,P84022,Q12830,Q86V38,P51532,Q6P3S4,Q96T37,Q59F45,Q9UJU2,Q2XSC7,Q69YZ5,P49715,Q6FHQ0,Q6LE81,P06400,Q6LE80,Q9BT62,Q7Z7J0,Q6W2J9,Q9BT61,Q56D06,Q8N2W9,O95983,Q59EB5,Q53GA5,Q6LE82,Q9UQL6,Q6LE79,Q59FP7,Q4V760,Q59HH0,Q6DUF0,Q86VW9,Q659G9,P26358,Q86YY2,Q19RW5,O75376,Q86YY1,Q15596,Q4FD37,A8K5E3,Q96GV1,Q96GD7,O00267,Q59EY1,Q53H55,P23497,A7LNP2,Q05CA4,Q5U0E4,Q5JNZ9,Q9Y618,…	1611	266	13528	1.29432	1	0.495141	73.8462
Annotation Cluster 65	Enrichment Score: 3.2038541156790235
Category	Term	Count	%	PValue	Genes	List Total	Pop Hits	Pop Total	Fold Enrichment	Bonferroni	Benjamini	FDR
SP_PIR_KEYWORDS	stress response	20	1.05152	1.26271e-05	Q59EJ3,Q53HF2,Q2VPJ6,Q96C20,P61604,P11142,A2ICT2,Q53ZP9,Q9BV61,Q96HX7,Q96BE0,Q96H53,Q14568,Q53SE2,Q53G55,Q96IS6,Q53FS6,Q2TAL4,Q59EK6,Q2F839,P48741,Q6PK50,P38646,Q86U12,Q53X54,P08238,Q9NZ87,Q8TBA7,P10809,P04792,Q86SX1,Q96EI7,A8K5I0,P34932,Q6FI51,Q7KYN0,Q5TBM7,Q8N1C8,P25685,Q58FG0,Q9H6X9,Q58FF9,P07900,Q58FF8,P08107,O95757,Q58FF7,Q96RI4,Q9UCR6,Q9UC35,Q59GF8,O95433,Q9UQC1,P54652,Q6FHS4,A8K500,Q9NWW3,…	1895	66	19235	3.07588	0.00797368	0.000117723	0.0187883
INTERPRO	IPR013126:Heat shock protein 70	8	0.42061	8.31995e-05	P34932,Q59EJ3,Q7KYN0,Q53HF2,Q5TBM7,Q8N1C8,Q2KHP4,P11142,P08107,Q59GF8,P11021,Q96BE0,Q96H53,Q96IS6,Q9UQC1,Q2TAL4,P54652,Q2F839,Q9NWW3,Q53GZ6,P48741,P38646,Q53H23,Q9NZ87,Q1HB43,A8K5I0,Q92598	1804	12	16659	6.15632	0.174857	0.00547634	0.145353
INTERPRO	IPR001023:Heat shock protein Hsp70	8	0.42061	8.31995e-05	P34932,Q59EJ3,Q7KYN0,Q53HF2,Q5TBM7,Q8N1C8,Q2KHP4,P11142,P08107,Q59GF8,P11021,Q96BE0,Q96H53,Q96IS6,Q9UQC1,Q2TAL4,P54652,Q2F839,Q9NWW3,Q53GZ6,P48741,P38646,Q53H23,Q9NZ87,Q1HB43,A8K5I0,Q92598	1804	12	16659	6.15632	0.174857	0.00547634	0.145353
INTERPRO	IPR018181:Heat shock protein 70, conserved site	8	0.42061	0.000503685	P34932,Q59EJ3,Q7KYN0,Q53HF2,Q5TBM7,Q8N1C8,Q2KHP4,P11142,P08107,Q59GF8,P11021,Q96BE0,Q96H53,Q96IS6,Q9UQC1,Q2TAL4,P54652,Q2F839,Q9NWW3,Q53GZ6,P48741,P38646,Q53H23,Q9NZ87,Q1HB43,A8K5I0,Q92598	1804	15	16659	4.92506	0.687704	0.0213214	0.876918
PIR_SUPERFAMILY	PIRSF002581:chaperone HSP70	6	0.315457	0.00156313	Q96IS6,Q9UQC1,Q59EJ3,P54652,Q8N1C8,Q53HF2,Q2F839,P48741,Q53GZ6,Q9NWW3,P38646,Q2KHP4,Q53H23,P11142,P08107,Q9NZ87,P11021,Q96BE0,Q96H53,Q1HB43,A8K5I0	976	8	7396	5.6834	0.747573	0.158088	2.40203
KEGG_PATHWAY	hsa04612:Antigen processing and presentation	11	0.578339	0.869311	P34932,Q59EJ3,Q7KYN0,Q6FHK7,P27797,Q6MZZ1,Q2VPJ6,Q53HF2,Q2KHP4,P07900,P11142,Q9H6X9,P61289,P08107,Q6ZP56,Q59GF8,Q96HX7,P11021,Q96BE0,Q96H53,Q14568,Q96IS6,Q6IAT4,P27824,Q9UQC1,Q2TAL4,P54652,A8K500,A8K9A3,P48741,Q53GZ6,Q9NWW3,Q53G71,Q6PK50,Q86U12,Q8TBA7,Q9NZ87,P08238,Q86SX1,A8K5I0	808	83	5085	0.834054	1	0.967009	100
Annotation Cluster 66	Enrichment Score: 3.1848704971751642
Category	Term	Count	%	PValue	Genes	List Total	Pop Hits	Pop Total	Fold Enrichment	Bonferroni	Benjamini	FDR
GOTERM_BP_FAT	GO:0006261~DNA-dependent DNA replication	19	0.998948	8.61746e-05	Q2NLC9,Q9BVT2,P35249,Q14756,Q9BWF4,P35251,Q4ZG57,Q6NWZ5,Q5U0C2,Q308M6,Q8NHX6,Q59F49,Q14566,Q6PK95,Q9UHN1,Q00577,Q5U0P9,P39748,Q53HJ4,A5D8W9,Q13415,Q2NLD4,Q9NYD7,A8K0Y9,P11387,P54132,Q53FG5,Q53T61,Q6FHX6,P28340,Q96F82,A8K6E7,Q56A79,Q53HK8,Q6IPL9,P49736,A8KA78,P27694,Q7Z6P5,P17096,Q3B7X0,Q9UGV6,Q14321,P25205,Q5T7C4,P33992,Q5W0E8,P33991,Q5T7C6,Q59GW1,P26583,P40938,Q5T6U9,Q5T6U8,Q5U071,P09429,Q5T7C0,…	1611	58	13528	2.75083	0.274337	0.00186262	0.158774
GOTERM_BP_FAT	GO:0006268~DNA unwinding during replication	8	0.42061	0.000535402	Q9NYD7,Q2NLC9,P11387,Q9BVT2,Q53T61,Q9BWF4,Q6NWZ5,Q4ZG57,Q56A79,Q6IPL9,P49736,A8KA78,Q14566,Q6PK95,Q00577,Q5U0P9,P17096,Q14321,Q9UGV6,Q5T7C4,P33991,Q5T7C6,Q59GW1,A5D8W9,P26583,Q5T6U9,Q5T6U8,Q5U071,P09429,Q5T7C0,Q2NLD4,Q5T7C3	1611	14	13528	4.79844	0.863682	0.0101156	0.982607
GOTERM_BP_FAT	GO:0032392~DNA geometric change	9	0.473186	0.000574367	Q9NYD7,Q2NLC9,P11387,Q9BVT2,Q53T61,Q9BWF4,Q6NWZ5,Q4ZG57,Q56A79,Q6IPL9,P49736,A8KA78,Q14566,Q6PK95,Q8IYB8,Q00577,Q5U0P9,P17096,Q14321,Q9UGV6,Q5T7C4,P33991,Q5T7C6,A8K301,Q59GW1,A5D8W9,P26583,Q5T6U9,Q5T6U8,Q5U071,P09429,Q5T7C0,Q2NLD4,Q5T7C3	1611	18	13528	4.19863	0.88209	0.0107933	1.05376
GOTERM_BP_FAT	GO:0032508~DNA duplex unwinding	9	0.473186	0.000574367	Q9NYD7,Q2NLC9,P11387,Q9BVT2,Q53T61,Q9BWF4,Q6NWZ5,Q4ZG57,Q56A79,Q6IPL9,P49736,A8KA78,Q14566,Q6PK95,Q8IYB8,Q00577,Q5U0P9,P17096,Q14321,Q9UGV6,Q5T7C4,P33991,Q5T7C6,A8K301,Q59GW1,A5D8W9,P26583,Q5T6U9,Q5T6U8,Q5U071,P09429,Q5T7C0,Q2NLD4,Q5T7C3	1611	18	13528	4.19863	0.88209	0.0107933	1.05376
GOTERM_BP_FAT	GO:0006270~DNA replication initiation	7	0.368034	0.00782006	Q2NLC9,Q00577,Q7Z6P5,Q5U0P9,Q53FG5,Q53T61,P25205,Q53HJ4,P33992,P33991,Q9BWF4,Q96F82,Q4ZG57,Q56A79,Q13415,P49736,Q8NHX6,Q2NLD4,Q59F49,Q14566	1611	16	13528	3.67381	1	0.0984065	13.4768
Annotation Cluster 67	Enrichment Score: 2.9767888460922967
Category	Term	Count	%	PValue	Genes	List Total	Pop Hits	Pop Total	Fold Enrichment	Bonferroni	Benjamini	FDR
GOTERM_BP_FAT	GO:0070647~protein modification by small protein conjugation or removal	40	2.10305	8.05588e-06	Q16531,P09936,A6NJB1,Q8WW12,Q9NSJ7,Q9UPN9,O75150,Q4W5K6,A6NJ93,Q7KZX8,Q5H924,P61077,Q15819,Q5H962,A4D1L5,P61081,Q92466,A4D1L6,Q14139,A0JNS3,Q13564,Q96GF2,Q147T5,Q3MIH3,Q9Y4A5,Q8TBS8,P68036,Q59FH1,Q5VTR2,Q96C32,Q8N2W9,Q5PY61,Q3MN78,Q969M7,Q93009,Q8TAF3,Q96IW5,A0M8W4,Q7Z6E9,A6NG77,A6NLF6,Q53GF3,P62256,Q6ZN99,Q49A90,P51668,Q6U8A4,Q9UPT9,P62837,Q8IWJ0,P55854,P22681,Q92905,Q9UMS4,Q66K58,Q9UFQ0,A6NMY8,…	1611	160	13528	2.09932	0.0295312	0.00023416	0.0148528
GOTERM_BP_FAT	GO:0032446~protein modification by small protein conjugation	35	1.84017	8.53425e-06	Q16531,A6NJB1,Q8WW12,Q9NSJ7,Q9UPN9,O75150,A6NJ93,Q7KZX8,Q5H924,P61077,Q15819,Q5H962,A4D1L5,P61081,Q92466,A4D1L6,Q14139,A0JNS3,Q13564,Q96GF2,Q147T5,Q3MIH3,Q8TBS8,P68036,Q5VTR2,Q96C32,Q8N2W9,Q5PY61,Q3MN78,Q969M7,A0M8W4,Q96IW5,Q7Z6E9,A6NG77,A6NLF6,Q53GF3,P62256,Q6ZN99,Q49A90,P51668,Q9UPT9,P62837,Q8IWJ0,P55854,P22681,Q9UMS4,Q66K58,Q9UFQ0,Q86VP6,Q13356,Q7Z6F4,P62979,A8K786,Q5RKT7,Q96H31,Q05DC0,P61956,…	1611	132	13528	2.22655	0.0312571	0.000246141	0.0157347
SMART	SM00212:UBCc	14	0.736067	0.000112613	P62837,A6NJB1,A6NJ93,P61077,Q15819,Q7Z6F4,A8K5Y9,A8K786,A4D1L5,P61081,A4D1V0,A4D1L6,Q9Y2X8,A6NJC1,P63279,Q5JXB2,Q96RP6,P68036,A8K1Z8,Q9NPD8,Q2TU36,P61088,Q3MN78,Q75MF5,Q969M7,P61086,A0M8W4,Q9UQL0,A6NLF6,P62256,Q7KZS0,P51668	909	41	9079	3.4105	0.032132	0.00217493	0.149603
INTERPRO	IPR000608:Ubiquitin-conjugating enzyme, E2	14	0.736067	0.000255351	P62837,A6NJB1,A6NJ93,P61077,Q15819,Q7Z6F4,A8K5Y9,A8K786,A4D1L5,P61081,A4D1V0,A4D1L6,Q9Y2X8,A6NJC1,P63279,Q5JXB2,Q96RP6,P68036,A8K1Z8,Q9NPD8,Q2TU36,P61088,Q3MN78,Q75MF5,Q969M7,P61086,A0M8W4,Q9UQL0,A6NLF6,P62256,Q7KZS0,P51668	1804	41	16659	3.15324	0.445638	0.0139479	0.445478
UP_SEQ_FEATURE	active site:Glycyl thioester intermediate	18	0.946372	0.000298488	Q8IWJ0,P62837,A6NJB1,A6NJ93,Q5H924,P61077,Q7Z6F4,A8K5Y9,Q5H962,A8K786,A4D1L5,P61081,A4D1V0,O95352,A4D1L6,Q9Y2X8,A6NJC1,P63279,Q9Y3C8,Q9UBT2,Q5VTX1,Q96RP6,Q712V1,P68036,A8K1Z8,A0AVT1,P22314,Q9NPD8,Q2TU36,P61088,Q7Z6Z7,Q75MF5,Q3MN78,Q969M7,P61086,Q9UQL0,Q5JRR8,A6NLF6,Q5JRR6,P62256,Q7KZS0,P51668	1886	69	19113	2.64369	0.718653	0.0277881	0.556819
INTERPRO	IPR016135:Ubiquitin-conjugating enzyme/RWD-like	15	0.788644	0.000396002	P62837,A6NJB1,A6NJ93,Q15819,P61077,Q7Z6F4,A8K5Y9,A8K786,A4D1L5,P61081,A4D1V0,Q9P2K8,A4D1L6,Q9Y2X8,A6NJC1,Q5JXB2,P63279,Q96RP6,P68036,A8K1Z8,Q9NPD8,Q2TU36,P61088,Q3MN78,Q75MF5,Q969M7,P61086,A0M8W4,Q9UQL0,A6NLF6,P62256,Q7KZS0,P51668	1804	48	16659	2.88577	0.599462	0.0188809	0.690054
GOTERM_BP_FAT	GO:0016567~protein ubiquitination	28	1.47213	0.000648343	Q16531,A6NJB1,Q8WW12,Q9NSJ7,Q9UPN9,O75150,A6NJ93,Q7KZX8,Q5H924,P61077,Q15819,Q5H962,A4D1L5,Q92466,Q14139,A4D1L6,A0JNS3,Q96GF2,Q147T5,Q3MIH3,Q8TBS8,P68036,Q5VTR2,Q96C32,Q5PY61,Q3MN78,A0M8W4,Q96IW5,Q7Z6E9,A6NG77,A6NLF6,Q53GF3,P62256,Q49A90,Q6ZN99,P51668,Q9UPT9,Q8IWJ0,P62837,P22681,Q9UMS4,Q66K58,Q9UFQ0,Q86VP6,Q13356,Q7Z6F4,P62979,A8K786,Q5RKT7,Q96H31,Q05DC0,Q2NLE2,P15170,Q96JH7,Q96RP6,Q8WYN9,Q8WYN8,…	1611	119	13528	1.97583	0.910478	0.0120537	1.18872
GOTERM_MF_FAT	GO:0016879~ligase activity, forming carbon-nitrogen bonds	45	2.36593	0.00190904	O75150,Q53FN2,P49915,Q5H924,Q9UKT8,P61077,Q9H7Z5,A4D1L5,P61081,Q92466,A4D1L6,Q14139,P59998,Q5T6L5,Q5T6L4,Q6W2J9,P68036,Q5T4S7,Q8N2W9,Q52M77,Q969M7,A0M8W4,Q7Z6E9,Q8WVW0,Q9UQL0,A6NLF6,Q59FY4,Q59HH3,P62256,Q5T6L6,A8K639,P62837,Q8IWJ0,P55854,P22681,Q6UB35,Q4W5I2,A8K945,Q7Z6F4,P22102,P08243,A4D1V0,Q8NEZ5,P61956,Q53H55,P63279,A8K6E5,Q2TBF3,A8K1Z8,A3KMP8,P61088,A8K334,Q29RF6,Q75MF5,Q4VXH1,P61086,O75879,…	1596	231	12983	1.58468	0.910492	0.0343725	3.06107
SP_PIR_KEYWORDS	ubl conjugation pathway	70	3.68034	0.00389328	Q16531,P09936,Q9UPN9,O75150,Q53FN2,Q9UKT8,Q5H924,P61077,A4D1L5,P61081,P49792,Q92466,A0JNS3,Q14139,A4D1L6,Q13564,Q9HB71,Q2HIX7,Q5T2B5,Q7Z5K8,Q5T2B7,Q5R371,Q8TBS8,Q712V1,P68036,Q5R370,Q5T4S7,Q8N2W9,P54578,Q969M7,Q93009,Q96IW5,A0M8W4,P40818,Q9UQL0,Q53XY5,Q6NVY0,A6NG77,A6NLF6,P62256,Q6U8A4,Q9UPT9,Q8IWJ0,P62837,Q05DF5,P55854,P22681,A6NMY8,Q4W5I2,Q7Z6F4,A4D1V0,Q8NEZ5,P61956,Q53H55,Q14258,P63279,A8K6E5,…	1895	509	19235	1.39593	0.915682	0.0210946	5.63949
GOTERM_MF_FAT	GO:0019787~small conjugating protein ligase activity	32	1.68244	0.0109539	Q9Y4X5,A6NJB1,O75150,Q53FN2,A6NJ93,Q9UKT8,Q5H924,P61077,Q15819,A8K5Y9,Q5H962,A4D1L5,P61081,Q92466,A4D1L6,Q14139,Q59FM8,Q53EY9,Q9Y2X8,A6NJC1,Q5JXB2,Q147T5,Q9UM13,Q6W2J9,P68036,Q5T4S7,Q5VTR2,Q2TU36,Q8N2W9,Q3MN78,Q969M7,A0M8W4,Q7Z6E9,Q9UQL0,A6NLF6,P62256,Q6ZN99,P51668,P62837,Q8IWJ0,P55854,P22681,Q9UMS4,Q13356,Q9UJX2,Q4W5I2,Q7Z6F4,A8K786,A4D1V0,Q8NEZ5,P61956,Q05DC0,Q53H55,P63279,A8K6E5,Q96RP6,A8K1Z8,…	1596	166	12983	1.56814	0.999999	0.143214	16.406
GOTERM_MF_FAT	GO:0016881~acid-amino acid ligase activity	35	1.84017	0.0322749	Q9Y4X5,A6NJB1,O75150,Q53FN2,A6NJ93,Q5H924,Q9UKT8,P61077,Q9H7Z5,Q15819,A8K5Y9,Q5H962,A4D1L5,P61081,Q92466,A4D1L6,Q14139,Q59FM8,Q5YKL1,Q53EY9,Q9Y2X8,A6NJC1,P59998,Q147T5,Q5JXB2,Q9UM13,Q6W2J9,P68036,Q5T4S7,Q5VTR2,Q2TU36,Q8N2W9,Q3MN78,Q969M7,Q68CQ5,A0M8W4,Q7Z6E9,Q9UQL0,A6NLF6,P62256,Q6ZN99,P51668,P62837,Q8IWJ0,P55854,P22681,Q9UMS4,Q13356,Q9UJX2,Q4W5I2,Q7Z6F4,P48507,A8K786,A4D1V0,Q8NEZ5,Q05DC0,P61956,…	1596	201	12983	1.41649	1	0.328619	41.3604
GOTERM_MF_FAT	GO:0004842~ubiquitin-protein ligase activity	26	1.36698	0.0564774	A6NJB1,Q53FN2,O75150,Q9UKT8,Q5H924,A6NJ93,P61077,A8K5Y9,Q5H962,A4D1L5,P61081,Q92466,Q14139,A4D1L6,Q53EY9,Q9Y2X8,A6NJC1,Q5JXB2,Q147T5,Q9UM13,Q6W2J9,P68036,Q5T4S7,Q5VTR2,Q2TU36,Q3MN78,Q7Z6E9,Q9UQL0,A6NLF6,P62256,Q6ZN99,P51668,Q8IWJ0,P62837,P22681,Q9UMS4,Q13356,Q9UJX2,Q4W5I2,Q7Z6F4,A8K786,A4D1V0,Q8NEZ5,Q05DC0,A8K6E5,Q96RP6,Q9NPD8,A3KMP8,P61088,Q29RF6,Q7Z6Z7,Q75MF5,Q4VXH1,P61086,A7MCT5	1596	147	12983	1.43879	1	0.44163	61.1644
KEGG_PATHWAY	hsa04120:Ubiquitin mediated proteolysis	29	1.52471	0.0890994	Q16531,Q15369,A6NJB1,Q53FN2,A6NJ93,Q5H924,P61077,A8K5Y9,Q5H962,A4D1L5,P61081,Q92466,A4D1L6,Q69YV3,Q14139,Q13617,Q9Y2X8,A6NJC1,Q13619,Q5T2B5,Q5JXB2,Q5T2B7,Q9UBT2,Q9UM13,Q712V1,P68036,P22314,Q8N2W9,Q3MN78,Q969M7,Q9UQL0,Q5JRR8,A6NG77,A6NLF6,Q5JRR6,P62256,P51668,Q9UJX3,P62837,Q8IWJ0,P22681,Q9UMS4,Q13356,Q9UJX2,Q4W5I2,Q7Z6F4,A8K786,A4D1V0,Q53H55,P63279,A8K6E5,Q96RP6,A8K1Z8,A2A2W2,A0AVT1,A3KMP8,Q2M2R1,…	808	137	5085	1.33216	1	0.350334	68.0064
Annotation Cluster 68	Enrichment Score: 2.9138523686348266
Category	Term	Count	%	PValue	Genes	List Total	Pop Hits	Pop Total	Fold Enrichment	Bonferroni	Benjamini	FDR
INTERPRO	IPR002717:MOZ/SAS-like protein	5	0.262881	0.00062491	A8K4Z1,Q76L81,Q59EJ8,Q561W3,Q69YR9,Q8WYB5,Q92794,Q92993,O95251,Q9H7Z6,A5PKX7	1804	5	16659	9.23448	0.764017	0.0241774	1.08689
INTERPRO	IPR016181:Acyl-CoA N-acyltransferase	11	0.578339	0.00112291	A8K4Z1,Q96F10,Q2TM25,Q76L81,P21673,Q59EJ8,Q561W3,Q69YR9,Q92794,Q9H8E8,Q92993,Q6ICU9,Q0IIN2,O95251,Q147X3,Q9H7Z6,A2A2I5,Q8WYB5,Q502X4,Q9GZZ1,Q6P4J0,Q9H2N9,A5PKX7	1804	31	16659	3.27675	0.925382	0.0397415	1.94506
UP_SEQ_FEATURE	zinc finger region:C2HC-type	5	0.262881	0.00258393	A8K4Z1,Q76L81,Q59EJ8,Q561W3,Q69YR9,Q8WYB5,Q92794,Q92993,O95251,Q9H7Z6,A5PKX7	1886	7	19113	7.23868	0.999983	0.133018	4.72401
Annotation Cluster 69	Enrichment Score: 2.873812365041983
Category	Term	Count	%	PValue	Genes	List Total	Pop Hits	Pop Total	Fold Enrichment	Bonferroni	Benjamini	FDR
UP_SEQ_FEATURE	repeat:WD 4	44	2.31335	0.0002339	Q9C0J8,Q9ULV4,Q9HBG5,Q9HBG6,Q9BR76,P43034,Q7L8K0,Q05D27,Q9UKT8,Q59EA2,Q8NDL0,Q09028,Q7Z6D8,A6NGM1,Q92466,Q8TEQ6,Q05DP8,Q6FHQ0,A7J992,P31146,Q15291,Q9BTY4,Q3ZCS1,Q13347,Q8WTV7,A6NJ42,Q3B874,Q9NUL1,P63244,Q59ER5,Q8WWQ0,P61964,Q5JTT6,Q59HC1,Q8N2L6,P35606,Q587J1,A8K5R5,Q8IWA0,Q8TDJ6,A4D275,Q12788,O75083,P50851,A8K6E9,Q96E41,Q9H9Z0,Q5JNZ9,Q9HAT9,Q96A78,O15143,Q9Y263,Q4VXH1,Q9NW82,O43815,Q4W5J4,Q6FH47,…	1886	251	19113	1.7765	0.629804	0.0233824	0.436582
INTERPRO	IPR019782:WD40 repeat 2	42	2.2082	0.000631442	Q9C0J8,Q9ULV4,Q9HBG5,Q9HBG6,Q9BR76,P43034,Q7L8K0,Q05D27,Q9UKT8,Q59EA2,Q8NDL0,Q09028,Q7Z6D8,A6NGM1,Q92466,Q8TEQ6,Q6FHQ0,Q05DP8,A7J992,P31146,Q15291,Q9BTY4,Q3ZCS1,Q13347,A6NJ42,Q8WTV7,Q3B874,Q59ER5,Q9NUL1,P63244,P61964,Q8WWQ0,Q5JTT6,Q8N2L6,P35606,Q587J1,A8K5R5,Q8IWA0,Q8TDJ6,A4D275,Q12788,O75083,A8K6E9,Q9H9Z0,Q96E41,Q5JNZ9,Q9HAT9,Q96A78,O15143,Q9Y263,Q4VXH1,Q9NW82,O43815,Q6FH47,Q9H7P3,Q53HU7,Q5VLR4,…	1804	226	16659	1.71614	0.767553	0.0240249	1.09819
UP_SEQ_FEATURE	repeat:WD 5	40	2.10305	0.00071044	Q9C0J8,Q9HBG5,Q9HBG6,Q9BR76,P43034,Q7L8K0,Q05D27,Q8NDL0,Q09028,Q7Z6D8,Q92466,Q8TEQ6,Q05DP8,Q6FHQ0,A7J992,P31146,Q15291,Q9BTY4,Q3ZCS1,Q13347,Q8WTV7,A6NJ42,Q3B874,Q9NUL1,P63244,Q59ER5,Q8WWQ0,P61964,Q5JTT6,Q59HC1,Q8N2L6,P35606,Q587J1,A8K5R5,Q8IWA0,Q8TDJ6,A4D275,Q12788,O75083,P50851,A8K6E9,Q96E41,Q9H9Z0,Q5JNZ9,Q9HAT9,Q96A78,O15143,Q9Y263,Q9NW82,O43815,Q4W5J4,Q6FH47,Q9H7P3,Q53HU7,Q5VLR4,P57737,Q53HU2,…	1886	233	19113	1.73977	0.951151	0.0534119	1.32048
UP_SEQ_FEATURE	repeat:WD 3	44	2.31335	0.000757849	Q9C0J8,Q9ULV4,Q9HBG5,Q9HBG6,Q9BR76,P43034,Q7L8K0,Q05D27,Q9UKT8,Q59EA2,Q8NDL0,Q09028,Q7Z6D8,A6NGM1,Q92466,Q8TEQ6,Q05DP8,Q6FHQ0,A7J992,P31146,Q15291,Q9BTY4,Q3ZCS1,Q13347,Q8WTV7,A6NJ42,Q3B874,Q9NUL1,P63244,Q59ER5,Q8WWQ0,P61964,Q5JTT6,Q59HC1,Q8N2L6,P35606,Q587J1,A8K5R5,Q8IWA0,Q8TDJ6,A4D275,Q12788,O75083,P50851,A8K6E9,Q96E41,Q9H9Z0,Q5JNZ9,Q9HAT9,Q96A78,O15143,Q9Y263,Q4VXH1,Q9NW82,O43815,Q4W5J4,Q6FH47,…	1886	265	19113	1.68265	0.960067	0.0549345	1.40801
UP_SEQ_FEATURE	repeat:WD 2	45	2.36593	0.000826157	Q9C0J8,Q9ULV4,Q9HBG5,Q9HBG6,Q9BR76,P43034,Q7L8K0,Q05D27,Q9UKT8,Q59EA2,Q8NDL0,Q09028,Q7Z6D8,A6NGM1,Q92466,Q8TEQ6,Q05DP8,Q6FHQ0,A7J992,P31146,Q15291,Q9BTY4,Q3ZCS1,Q13347,Q8WTV7,A6NJ42,Q3B874,P63244,Q9NUL1,Q59ER5,Q8WWQ0,P61964,Q5JTT6,Q59HC1,Q8N2L6,P35606,Q587J1,A8K5R5,Q8IWA0,Q8TDJ6,A4D275,Q12788,O75083,P50851,A8K6E9,Q96E41,Q9H9Z0,Q5JNZ9,Q9HAT9,Q4ZG05,Q96A78,O15143,Q9Y263,Q4VXH1,Q9NW82,O43815,Q4W5J4,…	1886	274	19113	1.66437	0.970132	0.0577719	1.534
UP_SEQ_FEATURE	repeat:WD 1	45	2.36593	0.000826157	Q9C0J8,Q9ULV4,Q9HBG5,Q9HBG6,Q9BR76,P43034,Q7L8K0,Q05D27,Q9UKT8,Q59EA2,Q8NDL0,Q09028,Q7Z6D8,A6NGM1,Q92466,Q8TEQ6,Q05DP8,Q6FHQ0,A7J992,P31146,Q15291,Q9BTY4,Q3ZCS1,Q13347,Q8WTV7,A6NJ42,Q3B874,P63244,Q9NUL1,Q59ER5,Q8WWQ0,P61964,Q5JTT6,Q59HC1,Q8N2L6,P35606,Q587J1,A8K5R5,Q8IWA0,Q8TDJ6,A4D275,Q12788,O75083,P50851,A8K6E9,Q96E41,Q9H9Z0,Q5JNZ9,Q9HAT9,Q4ZG05,Q96A78,O15143,Q9Y263,Q4VXH1,Q9NW82,O43815,Q4W5J4,…	1886	274	19113	1.66437	0.970132	0.0577719	1.534
SP_PIR_KEYWORDS	wd repeat	45	2.36593	0.000931778	Q9C0J8,Q9ULV4,Q9HBG5,Q9HBG6,Q9BR76,P43034,Q7L8K0,Q05D27,Q9UKT8,Q59EA2,Q8NDL0,Q09028,Q7Z6D8,A6NGM1,Q92466,Q8TEQ6,Q05DP8,Q6FHQ0,A7J992,P31146,Q15291,Q9BTY4,Q3ZCS1,Q13347,Q8WTV7,A6NJ42,Q3B874,P63244,Q9NUL1,Q59ER5,Q8WWQ0,P61964,Q5JTT6,Q59HC1,Q8N2L6,P35606,Q587J1,A8K5R5,Q8IWA0,Q8TDJ6,A4D275,Q12788,O75083,P50851,A8K6E9,Q96E41,Q9H9Z0,Q5JNZ9,Q9HAT9,Q4ZG05,Q96A78,O15143,Q9Y263,Q4VXH1,Q9NW82,O43815,Q4W5J4,…	1895	276	19235	1.65496	0.446239	0.00566679	1.37761
SMART	SM00320:WD40	44	2.31335	0.000988518	Q9C0J8,Q9ULV4,Q9HBG5,Q9HBG6,Q9BR76,P43034,Q7L8K0,Q05D27,Q9UKT8,Q59EA2,Q8NDL0,Q09028,Q7Z6D8,A6NGM1,Q92466,Q8TEQ6,Q05DP8,Q6FHQ0,A7J992,Q15010,P31146,Q15291,Q9BTY4,Q3ZCS1,Q13347,Q8WTV7,A6NJ42,Q3B874,Q9NUL1,P63244,Q59ER5,Q8WWQ0,P61964,Q3KQZ0,Q5JTT6,Q59HC1,Q8N2L6,P35606,Q587J1,A8K5R5,Q8IWA0,Q8TDJ6,A4D275,Q12788,O75083,P50851,Q5JUP7,A8K6E9,Q96E41,Q9H9Z0,Q5JNZ9,Q9HAT9,Q96A78,O15143,Q9Y263,Q4VXH1,Q9NW82,…	909	266	9079	1.65213	0.249347	0.0123927	1.30617
INTERPRO	IPR019781:WD40 repeat, subgroup	43	2.26078	0.0013597	Q9C0J8,Q9ULV4,Q9HBG5,Q9HBG6,Q9BR76,P43034,Q7L8K0,Q05D27,Q9UKT8,Q59EA2,Q8NDL0,Q09028,Q7Z6D8,A6NGM1,Q92466,Q8TEQ6,Q05DP8,Q6FHQ0,A7J992,P31146,Q15291,Q9BTY4,Q3ZCS1,Q13347,Q8WTV7,A6NJ42,Q3B874,Q9NUL1,P63244,Q59ER5,Q8WWQ0,P61964,Q5JTT6,Q59HC1,Q8N2L6,P35606,Q587J1,A8K5R5,Q8IWA0,Q8TDJ6,A4D275,Q12788,O75083,P50851,A8K6E9,Q96E41,Q9H9Z0,Q5JNZ9,Q9HAT9,Q96A78,O15143,Q9Y263,Q4VXH1,Q9NW82,O43815,Q4W5J4,Q6FH47,…	1804	242	16659	1.64084	0.956849	0.0458277	2.35063
INTERPRO	IPR017986:WD40 repeat, region	42	2.2082	0.00177827	Q9C0J8,Q9ULV4,Q9HBG5,Q9HBG6,Q9BR76,P43034,Q7L8K0,Q05D27,Q9UKT8,Q59EA2,Q8NDL0,Q09028,Q7Z6D8,A6NGM1,Q92466,Q8TEQ6,Q6FHQ0,Q05DP8,A7J992,P31146,Q15291,Q9BTY4,Q3ZCS1,Q13347,A6NJ42,Q8WTV7,Q3B874,Q59ER5,Q9NUL1,P63244,P61964,Q8WWQ0,Q5JTT6,Q8N2L6,P35606,Q587J1,A8K5R5,Q8IWA0,Q8TDJ6,A4D275,Q12788,O75083,A8K6E9,Q9H9Z0,Q96E41,Q5JNZ9,Q9HAT9,Q96A78,O15143,Q9Y263,Q4VXH1,Q9NW82,O43815,Q6FH47,Q9H7P3,Q53HU7,Q5VLR4,…	1804	238	16659	1.62961	0.983616	0.0555039	3.06371
INTERPRO	IPR019775:WD40 repeat, conserved site	47	2.47108	0.00209416	Q9HBG5,Q9ULV4,Q9C0J8,Q9HBG6,Q9BR76,Q7L8K0,P43034,Q05D27,Q8NDL0,Q9UKT8,Q59EA2,Q09028,Q7Z6D8,A6NGM1,Q92466,Q3ZCR3,A6NGM0,Q8TEQ6,Q05DP8,Q6FHQ0,A7J992,Q53G92,P31146,Q15291,Q9BTY4,Q13347,Q3ZCS1,Q8WTV7,A6NJ42,Q3B874,P63244,Q9NUL1,Q59ER5,Q8WWQ0,Q8WYP5,P61964,Q5JTT6,Q59HC1,Q8N2L6,P35606,Q587J1,A8K5R5,Q8IWA0,Q8TDJ6,A4D275,Q12788,O75083,P50851,A8K6E9,Q96E41,Q9H9Z0,Q13509,Q5JNZ9,Q9HAT9,A8MSG9,Q4ZG05,Q96A78,…	1804	277	16659	1.56686	0.992113	0.063345	3.59859
UP_SEQ_FEATURE	repeat:WD 6	33	1.73502	0.00218343	Q53G36,Q9HBG5,Q9C0J8,Q9HBG6,Q7L8K0,P43034,Q16576,A8MPU4,Q05D27,Q8NDL0,Q9NV06,Q53GN4,Q09028,Q7Z6D8,Q04726,Q9Y4P3,Q04727,Q5T1M8,Q69YF7,Q8TEQ6,Q6IAP9,Q59GD6,Q5T1M7,Q05DP8,Q6FHQ0,A7J992,Q6P1X2,Q58EZ8,Q6UXN9,Q8NFQ0,Q5JP00,Q9NWP3,Q15291,Q4W5L6,Q8TC06,O75717,Q9BTY4,Q9NV68,Q8TAF3,Q3ZCS1,Q8WTV7,Q3B874,Q969R7,P63244,Q9NUL1,Q59ER5,A8MRA5,Q13112,Q8WWQ0,P61964,Q59HC1,Q5JTT6,Q53FG9,Q8N2L6,Q9UMS4,Q59EL4,P35606,…	1886	192	19113	1.74181	0.999907	0.11944	4.00591
UP_SEQ_FEATURE	repeat:WD 7	27	1.41956	0.00313869	Q53G36,Q9HBG5,Q9C0J8,Q9HBG6,Q7L8K0,P43034,Q16576,A8MPU4,Q05D27,Q8NDL0,Q9NV06,Q53GN4,Q04726,Q9Y4P3,Q04727,Q69YF7,Q5T1M8,Q8TEQ6,Q6IAP9,Q59GD6,Q05DP8,Q6FHQ0,Q5T1M7,A7J992,Q58EZ8,Q5JP00,Q9NWP3,Q8TC06,O75717,Q9BTY4,Q9NV68,Q8TAF3,Q3ZCS1,Q8WTV7,Q9NUL1,P63244,Q59ER5,A8MRA5,Q13112,Q8WWQ0,P61964,Q5JTT6,Q53FG9,Q8N2L6,Q9UMS4,P35606,Q59EL4,Q587J1,Q05DR3,Q17RK4,Q8IWA0,Q8TDJ6,Q53H17,Q12788,O75083,Q9BZK7,A8K6E9,…	1886	150	19113	1.82415	0.999998	0.151992	5.71031
INTERPRO	IPR001680:WD40 repeat	44	2.31335	0.00473395	Q9C0J8,Q9ULV4,Q9HBG5,Q9HBG6,Q9BR76,P43034,Q7L8K0,Q05D27,Q9UKT8,Q59EA2,Q8NDL0,Q09028,Q7Z6D8,A6NGM1,Q92466,Q8TEQ6,Q05DP8,Q6FHQ0,A7J992,Q15010,P31146,Q15291,Q9BTY4,Q3ZCS1,Q13347,Q8WTV7,A6NJ42,Q3B874,Q9NUL1,P63244,Q59ER5,Q8WWQ0,P61964,Q3KQZ0,Q5JTT6,Q59HC1,Q8N2L6,P35606,Q587J1,A8K5R5,Q8IWA0,Q8TDJ6,A4D275,Q12788,O75083,P50851,Q5JUP7,A8K6E9,Q96E41,Q9H9Z0,Q5JNZ9,Q9HAT9,Q96A78,O15143,Q9Y263,Q4VXH1,Q9NW82,…	1804	266	16659	1.52751	0.999983	0.123716	7.96098
INTERPRO	IPR015943:WD40/YVTN repeat-like	47	2.47108	0.00951386	Q9C0J8,Q9ULV4,Q9HBG5,Q9HBG6,Q9BR76,Q7L8K0,P43034,Q05D27,Q8NDL0,Q9UKT8,Q59EA2,Q09028,Q7Z6D8,A6NGM1,Q92466,Q8TEQ6,Q05DP8,Q6FHQ0,A7J992,Q15010,P31146,Q15291,Q9BTY4,Q3ZCS1,Q13347,Q8WTV7,A6NJ42,Q3B874,P63244,Q9NUL1,Q59ER5,Q8WWQ0,P61964,Q3KQZ0,Q5JTT6,Q59HC1,Q8N2L6,P35606,Q587J1,A8K5R5,Q8IWA0,Q8TDJ6,A4D275,Q12788,O75083,P50851,Q5JUP7,A8K6E9,Q96E41,Q9H9Z0,Q5JNZ9,Q9HAT9,Q4ZG05,Q96A78,O15143,Q9Y263,Q4VXH1,…	1804	300	16659	1.44674	1	0.213391	15.3903
Annotation Cluster 70	Enrichment Score: 2.7688440204072142
Category	Term	Count	%	PValue	Genes	List Total	Pop Hits	Pop Total	Fold Enrichment	Bonferroni	Benjamini	FDR
GOTERM_MF_FAT	GO:0003678~DNA helicase activity	15	0.788644	0.000174465	Q9ULG1,Q12873,A8K6G2,P12956,Q32P45,P54132,Q7Z333,Q53T61,Q0Z7V0,A8K3X5,Q6ZP53,Q58F26,Q08211,Q53T09,Q13283,Q05CI5,Q4ZG57,Q6FI03,Q9NUK2,Q6IC76,Q86U63,Q9Y265,Q05CG6,Q14566,Q8IYB8,P46100,Q53TC2,Q6FG89,Q2TAZ1,Q14839,P13010,P46063,Q3B7X0,A6H8X4,Q6PJK6,Q32Q22,Q5U0Q1,P33991,Q53HH4,A8K301,Q12803,Q53HH7,Q5HYE9	1596	40	12983	3.05052	0.197777	0.00414928	0.283471
GOTERM_MF_FAT	GO:0008094~DNA-dependent ATPase activity	17	0.893796	0.00104281	P51531,Q12873,A8K6G2,P35249,Q12830,P51532,Q14756,Q08211,Q58F26,P35250,Q09028,P35251,Q53T09,Q05CI5,Q13283,Q5U0C2,Q6IC76,Q9H5E0,Q6PJK6,Q32Q22,Q5U0Q1,Q75MT5,Q9HBD4,P11388,P12956,P54132,Q32P45,Q59FZ6,Q0Z7V0,Q6ZP53,A8K3X5,Q6FI03,A8K6E7,Q53HK8,Q05CG6,Q6FG89,Q53TC2,Q14839,Q2TAZ1,P13010,Q3B7X0,P46063,Q53HH4,Q5W0E8,A7E2E1,P40938,Q12803,Q5HYE9,Q53HH7	1596	57	12983	2.42614	0.732265	0.0203795	1.68317
GOTERM_MF_FAT	GO:0004003~ATP-dependent DNA helicase activity	8	0.42061	0.0271364	Q12873,A8K6G2,P12956,P54132,Q32P45,Q0Z7V0,A8K3X5,Q08211,Q58F26,Q6ZP53,Q53T09,Q05CI5,Q13283,Q6FI03,Q6IC76,Q05CG6,Q53TC2,Q6FG89,Q2TAZ1,Q14839,P13010,P46063,Q3B7X0,Q6PJK6,Q32Q22,Q5U0Q1,Q53HH4,Q12803,Q53HH7,Q5HYE9	1596	25	12983	2.60311	1	0.293526	36.0839
Annotation Cluster 71	Enrichment Score: 2.7369360657634085
Category	Term	Count	%	PValue	Genes	List Total	Pop Hits	Pop Total	Fold Enrichment	Bonferroni	Benjamini	FDR
UP_SEQ_FEATURE	compositionally biased region:Ala/Asp-rich (DA-box)	6	0.315457	0.000402585	Q32Q15,Q6MZR8,Q05BV1,Q9NTJ3,Q5T821,Q7Z2X1,Q2KQ72,Q13497,Q68EN4,Q9UQE7,A6NM81,Q58F29,A6NLT9,Q6NSG3,Q92878,Q6P712,Q86VX4,Q6P2R1,Q6IEE0,A8K156,Q05D74,Q32P42,O95347,Q8IY18,Q14683,Q6IPS5,Q6P169	1886	8	19113	7.60061	0.819229	0.0343064	0.750318
INTERPRO	IPR003395:RecF/RecN/SMC protein, N-terminal	6	0.315457	0.000624167	Q32Q15,Q6MZR8,Q05BV1,Q9NTJ3,Q5T821,Q7Z2X1,Q2KQ72,Q13497,Q68EN4,Q9UQE7,A6NM81,Q58F29,A6NLT9,Q6NSG3,Q92878,Q6P712,Q86VX4,Q6P2R1,Q6IEE0,A8K156,Q05D74,Q32P42,O95347,Q8IY18,Q14683,Q6IPS5,Q6P169	1804	8	16659	6.92586	0.763611	0.0245602	1.0856
INTERPRO	IPR010935:SMCs flexible hinge	5	0.262881	0.00171336	Q9H6Q2,Q32Q15,Q6MZR8,Q05BV1,Q9NTJ3,Q5T821,Q7Z2X1,Q2KQ72,Q13497,O75141,Q68EN4,Q9UQE7,Q58F29,Q9UG39,A6NLT9,Q6NSG3,Q6P712,Q86VX4,Q6P2R1,Q6IEE0,A8K156,Q05D74,O95347,Q14683,Q6IPS5,Q6P169,Q6ZTQ8,Q6AHX6	1804	6	16659	7.6954	0.980961	0.0542645	2.95345
UP_SEQ_FEATURE	region of interest:Flexible hinge	5	0.262881	0.00258393	Q32Q15,Q6MZR8,Q05BV1,Q9NTJ3,Q5T821,Q7Z2X1,Q2KQ72,Q13497,Q68EN4,A6NM81,Q58F29,Q9UQE7,A6NLT9,Q6NSG3,Q6P712,Q86VX4,Q6P2R1,Q6IEE0,A8K156,Q05D74,O95347,Q8IY18,Q14683,Q6IPS5,Q6P169	1886	7	19113	7.23868	0.999983	0.133018	4.72401
PIR_SUPERFAMILY	PIRSF005719:structural maintenance of chromosomes protein	4	0.210305	0.0185794	A6NLT9,Q6NSG3,Q32Q15,Q6MZR8,Q05BV1,Q6P712,Q9NTJ3,Q86VX4,Q6P2R1,Q7Z2X1,Q5T821,Q6IEE0,A8K156,Q2KQ72,Q05D74,Q13497,O95347,Q14683,Q6IPS5,Q68EN4,Q9UQE7,Q58F29,Q6P169	976	5	7396	6.0623	1	0.692363	25.2844
Annotation Cluster 72	Enrichment Score: 2.722927263272286
Category	Term	Count	%	PValue	Genes	List Total	Pop Hits	Pop Total	Fold Enrichment	Bonferroni	Benjamini	FDR
INTERPRO	IPR000795:Protein synthesis factor, GTP-binding	9	0.473186	0.000183235	Q96CD8,Q96C29,Q9H8Z6,Q9NY44,Q6NSH7,Q16577,Q7KZX8,Q53GE9,Q05CQ1,Q6PK56,Q8IYD1,Q53HR1,Q6IPN6,Q53HM9,Q96GF2,Q53HR5,Q9H2I7,P68104,Q05639,Q2F837,Q6IPS9,P49411,Q9NVY0,A6NCI9,Q53GA1,Q8TA90,Q53SI8,Q9NZS6,Q8N5A0,Q59GP5,Q6P082,O60841,Q6P4C9,Q6IPT9,Q96RE1,Q53G89,Q14222,Q53G85,Q5JR01,Q7Z2Z2,Q8TBL1,Q6IQ15,P15170,Q5VTE0,Q96EB3,Q96RP9,Q8IUB0,P13639,Q53RV7,Q6NS35,Q9H909,Q53HQ7,Q504Z0,A6NKY5	1804	17	16659	4.88884	0.345126	0.010527	0.319857
INTERPRO	IPR004161:Translation elongation factor EFTu/EF1A, domain 2	7	0.368034	0.00336016	Q96CD8,Q96C29,Q6NSH7,Q9NY44,Q16577,Q7KZX8,Q53GE9,Q05CQ1,Q6PK56,Q8IYD1,Q53HR1,Q6IPN6,Q53HM9,Q96GF2,Q53HR5,Q9H2I7,P68104,Q05639,Q2F837,Q6IPS9,P49411,Q9NVY0,Q53GA1,Q8TA90,Q53SI8,Q9NZS6,Q8N5A0,Q59GP5,Q6P082,O60841,Q6P4C9,Q6IPT9,Q96RE1,Q53G89,Q14222,Q53G85,Q5JR01,Q8TBL1,Q6IQ15,P15170,Q5VTE0,Q96EB3,Q8IUB0,P13639,Q53RV7,Q6NS35,Q53HQ7,Q9H909,Q504Z0	1804	15	16659	4.30942	0.99958	0.0937302	5.71449
INTERPRO	IPR004160:Translation elongation factor EFTu/EF1A, C-terminal	5	0.262881	0.0110116	Q96CD8,Q6IPT9,Q96RE1,Q96C29,Q53G89,Q9NY44,Q6NSH7,Q14222,Q53G85,Q16577,Q7KZX8,Q53GE9,Q5JR01,Q8TBL1,Q8IYD1,Q6IPN6,Q53HR1,Q6IQ15,P15170,Q96GF2,Q53HM9,Q9H2I7,Q53HR5,Q05639,Q5VTE0,P68104,Q96EB3,P49411,Q6IPS9,Q2F837,Q9NVY0,Q53GA1,Q8IUB0,Q59GP5,Q9NZS6,Q6P082,Q6NS35,Q6P4C9,Q9H909,Q53HQ7,Q504Z0	1804	9	16659	5.13027	1	0.23604	17.5993
Annotation Cluster 73	Enrichment Score: 2.691221182618649
Category	Term	Count	%	PValue	Genes	List Total	Pop Hits	Pop Total	Fold Enrichment	Bonferroni	Benjamini	FDR
UP_SEQ_FEATURE	domain:RRM 4	9	0.473186	1.53534e-05	Q8IXT5,Q9H361,Q9UCF0,Q147Y3,A8MYB5,Q15164,Q5VX58,Q9BUQ0,Q96DU9,O95758,Q68DB9,Q3B867,Q9BQ02,A8K240,Q59H49,Q9UKA9,Q6IQ30,Q59GZ7,A6NLN1,Q13310,Q6ZS99,Q53GL4,P11940,Q3ZCS4,P26599,Q2VIP3,P19338	1886	14	19113	6.51481	0.0631405	0.00241271	0.0287132
GOTERM_MF_FAT	GO:0003727~single-stranded RNA binding	13	0.683491	3.33154e-05	Q9H361,P62633,Q5U0E9,Q53G33,A8K7M8,A8K4Z8,P31943,Q147Y3,Q6T598,Q6IBM4,Q15164,Q5VX58,Q9BUQ0,Q05CK9,Q3B867,Q59H49,P38919,P09651,Q59GZ7,Q6IQ30,A6NLN1,O60506,O14979,Q4JGY0,Q13310,Q6IPF2,Q0VAC0,P09234,Q4JGY1,Q6IBQ2,Q96SI9,P11940,Q53GL4,P26599,Q3ZCS4,Q3MI39,Q68DG4,Q2VIP3,Q5TAL3,A8K7V4,Q5TAL4,Q9BSM5,Q5TCG3,Q59GL1,Q3MIB7,Q5TCG1,Q5VWX1	1596	27	12983	3.91671	0.041205	0.00102577	0.054189
GOTERM_MF_FAT	GO:0008143~poly(A) RNA binding	7	0.368034	7.6506e-05	Q9H361,O14979,Q13310,A8K7M8,Q147Y3,Q15164,Q6IBQ2,Q5VX58,P11940,Q53GL4,Q05CK9,Q3ZCS4,Q2VIP3,Q3B867,P38919,Q5TCG3,Q59GL1,Q5VWX1,Q5TCG1,Q6IQ30,Q59GZ7,O60506	1596	8	12983	7.11787	0.0921088	0.00209846	0.1244
GOTERM_MF_FAT	GO:0070717~poly-purine tract binding	7	0.368034	0.000205545	Q9H361,O14979,Q13310,A8K7M8,Q147Y3,Q15164,Q6IBQ2,Q5VX58,P11940,Q53GL4,Q05CK9,Q3ZCS4,Q2VIP3,Q3B867,P38919,Q5TCG3,Q59GL1,Q5VWX1,Q5TCG1,Q6IQ30,Q59GZ7,O60506	1596	9	12983	6.327	0.228663	0.00479642	0.333889
INTERPRO	IPR006515:Polyadenylate binding protein, human types 1, 2, 3, 4	3	0.157729	0.0605307	Q9H361,Q5VX58,P11940,Q53GL4,Q3ZCS4,Q13310,Q2VIP3,Q3B867,Q147Y3,Q59GZ7,Q6IQ30,Q15164	1804	4	16659	6.92586	1	0.673104	66.4323
UP_SEQ_FEATURE	domain:PABC	3	0.157729	0.0794401	Q9H361,Q5VX58,P11940,Q53GL4,Q3ZCS4,Q13310,Q2VIP3,Q3B867,Q147Y3,Q59GZ7,Q6IQ30,Q15164	1886	5	19113	6.08049	1	0.923202	78.7368
SMART	SM00517:PolyA	3	0.157729	0.0814279	Q9H361,Q5VX58,P11940,Q53GL4,Q3ZCS4,Q13310,Q2VIP3,Q3B867,Q147Y3,Q59GZ7,Q6IQ30,Q15164	909	5	9079	5.99274	1	0.39509	67.6681
INTERPRO	IPR002004:Polyadenylate-binding protein/Hyperplastic disc protein	3	0.157729	0.0937541	Q9H361,Q5VX58,P11940,Q53GL4,Q3ZCS4,Q13310,Q2VIP3,Q3B867,Q147Y3,Q59GZ7,Q6IQ30,Q15164	1804	5	16659	5.54069	1	0.807542	82.1122
Annotation Cluster 74	Enrichment Score: 2.6468583369611847
Category	Term	Count	%	PValue	Genes	List Total	Pop Hits	Pop Total	Fold Enrichment	Bonferroni	Benjamini	FDR
GOTERM_BP_FAT	GO:0006913~nucleocytoplasmic transport	39	2.05047	1.06476e-05	Q01082,A8K4Z8,O14787,A6NLH1,Q96QC0,P12270,A6NDM5,Q5VXV2,Q59G92,Q6IN92,Q5VXV3,P61970,P49792,O00148,Q6P441,Q9HAV4,Q96Q15,Q2XSC7,Q15010,Q96QB7,Q01105,Q2F839,Q2NL95,Q53GA5,Q3KPI8,Q6DKH1,O15117,Q3MIB7,P63241,Q3KQZ0,Q96KE7,Q14974,Q19RW5,P39687,Q05D48,Q7M4N6,Q96FV9,Q53FK4,Q9BQG0,Q5JUP7,Q5J8L8,Q05DE9,Q2L6I0,Q5U0E4,Q9NX34,Q5T7X2,Q0VAC0,Q4VBX7,Q86XD3,Q6PKH8,Q13838,Q75R47,Q64I72,Q64I73,Q9UE33,Q5JC46,Q5JC45,…	1611	156	13528	2.09932	0.0388453	0.000295627	0.0196308
GOTERM_BP_FAT	GO:0006886~intracellular protein transport	74	3.89064	1.14285e-05	Q8TAR2,Q5VVD0,Q8WVW9,A8K2Z6,O00203,Q20WL3,O14787,Q96QC0,Q8IY97,Q4VJB6,Q9H115,Q7Z451,Q96EL6,P49792,Q53XZ5,A6NM19,Q59ES5,Q2XSC7,A6NJP3,Q96Q11,Q96QB7,Q2F831,Q9BZZ3,Q5VVC8,Q9Y5X1,Q8WTW0,Q5VVC9,Q2F839,Q6FI35,P62258,Q53ET1,Q86TP8,O95782,Q3MNE1,Q503A9,Q8TAA5,Q3KQZ0,Q13596,O95249,Q19RW5,O95140,P35606,Q9NP61,Q659G3,Q6PJ82,P27348,O75381,Q59EQ2,P63104,Q9NX34,Q6NX51,Q8WUG4,Q4VBX7,Q96G65,Q86XD3,Q2TAB5,Q53HL9,…	1611	374	13528	1.66149	0.0416343	0.000314956	0.0210704
GOTERM_BP_FAT	GO:0051169~nuclear transport	39	2.05047	1.45608e-05	Q01082,A8K4Z8,O14787,A6NLH1,Q96QC0,P12270,A6NDM5,Q5VXV2,Q59G92,Q6IN92,Q5VXV3,P61970,P49792,O00148,Q6P441,Q9HAV4,Q96Q15,Q2XSC7,Q15010,Q96QB7,Q01105,Q2F839,Q2NL95,Q53GA5,Q3KPI8,Q6DKH1,O15117,Q3MIB7,P63241,Q3KQZ0,Q96KE7,Q14974,Q19RW5,P39687,Q05D48,Q7M4N6,Q96FV9,Q53FK4,Q9BQG0,Q5JUP7,Q5J8L8,Q05DE9,Q2L6I0,Q5U0E4,Q9NX34,Q5T7X2,Q0VAC0,Q4VBX7,Q86XD3,Q6PKH8,Q13838,Q75R47,Q64I72,Q64I73,Q9UE33,Q5JC46,Q5JC45,…	1611	158	13528	2.07274	0.0527395	0.000389717	0.0268446
GOTERM_BP_FAT	GO:0006605~protein targeting	42	2.2082	0.00144611	Q9UPN3,Q8TAR2,Q01082,Q5VVD0,Q8WVW9,O00203,A8K2Z6,O14787,Q96QC0,Q4VJB6,P12270,A6NDM5,Q4VY19,Q96PK2,P61970,P49792,Q53XZ5,Q9HAV4,Q2XSC7,Q96Q11,Q15010,Q16543,Q2F831,Q9HAV7,Q5VVC8,A8K9K2,Q8WTW0,Q2F839,Q5VVC9,Q53GA5,P62258,Q8N4H5,Q3MNE1,Q6DKH1,O15117,Q8TAA5,P63241,Q3KQZ0,Q96A65,Q14974,Q19RW5,O95140,Q05D48,Q659G3,Q6PJ82,P27348,Q6NVX0,Q5JUP7,O75381,Q59EQ2,Q05DE9,Q2L6I0,Q5U0E4,P63104,O94826,Q6LD62,Q6NX51,…	1611	215	13528	1.6404	0.995414	0.0239643	2.63305
GOTERM_BP_FAT	GO:0033365~protein localization in organelle	29	1.52471	0.00701598	Q6P486,Q9UPN3,Q01082,Q4LE60,P55060,Q8WVW9,A8K2Z6,Q2XN98,Q3LRW2,Q3LRW1,O14787,Q96DA6,Q96QC0,Q504U6,Q9HDC8,Q3LRW5,Q3LRW4,Q3LRW3,Q6P2S0,P12270,A8K1K5,A6NDM5,P49458,Q05DA0,Q92621,Q96PK2,P61970,P49792,Q58F23,A8K3Z8,Q0VGM1,P62826,Q2XSC7,Q58F28,Q96Q11,Q5T9Q9,Q2F831,Q9HAV7,P61011,Q13696,Q1MSW8,Q9Y2X3,Q9NW64,A8K1B3,Q5VWG9,Q8WTW0,Q8N3S0,Q53GA5,A6NL14,P04637,Q6IT77,Q8N4H5,Q99968,Q6DKH1,O15117,Q8TAA5,Q15624,…	1611	146	13528	1.66795	1	0.0896274	12.1747
GOTERM_BP_FAT	GO:0017038~protein import	26	1.36698	0.0110998	Q6P486,Q01082,Q4LE60,P55060,A8K2Z6,Q2XN98,Q3LRW2,O14787,Q3LRW1,Q96DA6,Q96QC0,Q504U6,Q9HDC8,Q3LRW5,Q3LRW4,Q3LRW3,P12270,A8K1K5,A6NDM5,Q92621,P61970,P49792,Q58F23,A8K3Z8,P62826,Q2XSC7,Q58F28,Q96Q11,Q5T9Q9,Q2F831,Q9HAV7,Q1MSW8,Q9Y2X3,Q9NW64,A8K1B3,Q8N3S0,Q53GA5,A6NL14,P04637,Q6IT77,Q8N4H5,Q99968,Q6DKH1,O15117,Q8TAA5,Q15624,Q1MSX0,Q14974,Q19RW5,O95140,Q05D48,A8K1N0,Q8WYB3,Q6IN77,O75381,Q05DE9,Q2L6I0,…	1611	131	13528	1.66663	1	0.130505	18.6011
GOTERM_BP_FAT	GO:0000059~protein import into nucleus, docking	6	0.315457	0.043129	Q6P486,Q14974,Q4LE60,P55060,Q05D48,O14787,Q4VBX7,Q9HDC8,P52948,A6H8X3,A6NL14,A8K1K5,Q92621,O14980,Q6IN77,Q6DKH1,Q53XN2	1611	17	13528	2.96374	1	0.357362	55.6427
GOTERM_BP_FAT	GO:0051170~nuclear import	17	0.893796	0.0544367	Q6P486,Q01082,Q4LE60,P55060,Q2XN98,Q3LRW2,A8K4Z8,Q3LRW1,O14787,Q96QC0,Q504U6,Q3LRW5,Q9HDC8,Q3LRW4,Q3LRW3,A8K1K5,P12270,A6NDM5,Q92621,P61970,P49792,Q58F23,A8K3Z8,P62826,Q2XSC7,Q58F28,P09651,Q1MSW8,Q9NW64,Q9Y2X3,Q53GA5,A6NL14,P04637,Q6IT77,Q99968,Q6DKH1,O15117,Q15624,Q3MIB7,Q1MSX0,Q14974,Q19RW5,Q05D48,Q8WYB3,Q6IN77,Q05DE9,Q2L6I0,Q5U0E4,Q13073,Q4FEW1,Q6IPF2,Q0VAC0,Q4VBX7,Q9NZI9,A6H8X3,Q53RC4,P52948,…	1611	88	13528	1.6222	1	0.421125	64.3737
GOTERM_BP_FAT	GO:0006606~protein import into nucleus	16	0.84122	0.0820583	Q6P486,Q01082,Q4LE60,P55060,Q2XN98,Q3LRW2,O14787,Q3LRW1,Q96QC0,Q504U6,Q3LRW5,Q9HDC8,Q3LRW4,Q3LRW3,A8K1K5,P12270,A6NDM5,Q92621,P61970,P49792,A8K3Z8,Q58F23,P62826,Q2XSC7,Q58F28,Q1MSW8,Q9NW64,Q9Y2X3,Q53GA5,A6NL14,P04637,Q6IT77,Q99968,Q6DKH1,O15117,Q15624,Q1MSX0,Q14974,Q19RW5,Q05D48,Q8WYB3,Q6IN77,Q05DE9,Q2L6I0,Q5U0E4,Q13073,Q4FEW1,Q4VBX7,Q9NZI9,A6H8X3,Q53RC4,P52948,Q9UE33,Q5JC46,Q5JC45,O14980,Q0PKT5,…	1611	86	13528	1.56228	1	0.54112	79.3764
GOTERM_BP_FAT	GO:0034504~protein localization in nucleus	17	0.893796	0.0884307	Q6P486,Q01082,Q4LE60,P55060,Q2XN98,Q3LRW2,O14787,Q3LRW1,Q96QC0,Q504U6,Q3LRW5,Q9HDC8,Q3LRW4,Q3LRW3,A8K1K5,P12270,A6NDM5,Q92621,Q05DA0,P61970,P49792,A8K3Z8,Q58F23,Q0VGM1,P62826,Q2XSC7,Q58F28,Q1MSW8,Q9NW64,Q9Y2X3,Q5VWG9,Q53GA5,A6NL14,P04637,Q6IT77,Q99968,Q6DKH1,O15117,Q15624,Q1MSX0,Q14974,Q19RW5,Q05D48,Q8WYB3,Q6IN77,Q05DE9,Q2L6I0,Q5U0E4,Q13073,Q4FEW1,Q4VBX7,Q9NZI9,A6H8X3,Q53RC4,P52948,Q9UE33,Q5JC46,…	1611	94	13528	1.51865	1	0.564896	81.8624
Annotation Cluster 75	Enrichment Score: 2.6129839244102886
Category	Term	Count	%	PValue	Genes	List Total	Pop Hits	Pop Total	Fold Enrichment	Bonferroni	Benjamini	FDR
SP_PIR_KEYWORDS	thiamine pyrophosphate	7	0.368034	0.000494722	Q6LCA3,Q5TYJ8,Q5JPT8,Q5JPT9,P29401,Q9NP11,Q53GE3,P08559,P51854,A8K089,P29803,Q5JPU1,Q5JPU2,Q53EM5,Q5JPU0,Q99724,Q5JPU3,P78557,Q02218,Q99725,Q9UNV7,P11177,Q53H41,Q6MZE3,Q96HY7,A8K896	1895	12	19235	5.92106	0.269285	0.00319622	0.733655
INTERPRO	IPR005475:Transketolase, central region	6	0.315457	0.000624167	Q6LCK9,Q53EM5,Q5TYJ8,Q9BQL0,Q02218,P21953,P29401,P11177,Q6MZE3,A8K089,P51854,Q96HY7,A8K896	1804	8	16659	6.92586	0.763611	0.0245602	1.0856
INTERPRO	IPR005476:Transketolase, C-terminal	4	0.210305	0.0106955	P11177,Q6LCK9,Q53EM5,Q6MZE3,Q5TYJ8,Q9BQL0,P21953,P51854,A8K089,A8K896,P29401	1804	5	16659	7.38758	1	0.23222	17.1377
INTERPRO	IPR015941:Transketolase C-terminal-like	4	0.210305	0.0106955	P11177,Q6LCK9,Q53EM5,Q6MZE3,Q5TYJ8,Q9BQL0,P21953,P51854,A8K089,A8K896,P29401	1804	5	16659	7.38758	1	0.23222	17.1377
Annotation Cluster 76	Enrichment Score: 2.584975325666443
Category	Term	Count	%	PValue	Genes	List Total	Pop Hits	Pop Total	Fold Enrichment	Bonferroni	Benjamini	FDR
GOTERM_BP_FAT	GO:0030705~cytoskeleton-dependent intracellular transport	17	0.893796	0.000235054	Q9UPN3,P09936,Q15657,Q8IXI2,Q6PK16,Q4W5K6,Q6IBG5,P43034,Q9UE82,A1L2Z2,Q15753,Q9UMJ0,Q96PK2,Q6PEK6,P14649,Q07866,Q2TA90,Q86T83,Q99529,Q96D84,Q13696,Q7Z5D5,O15513,P35579,P35580,Q6P164,Q9UMG3,P09493,P42704,Q7Z406,Q8TCG4,Q6PKB2,Q561V9,O60313,A6NFV0,Q7RTP8,Q9BWG0,A0PJE3,Q7RTQ4,Q7RTQ3,Q7RTQ2,Q7RTQ1,Q7RTQ8,Q7RTQ7,Q9H0B6,Q6DV90,Q60FE2,Q4LE45,Q7RTQ0,Q53PC0,Q2PS10,P33176,Q07413,Q07414,Q2VIQ3,P68032,Q7RTQ9,…	1611	52	13528	2.74526	0.583028	0.00474272	0.432517
GOTERM_BP_FAT	GO:0010970~microtubule-based transport	10	0.525762	0.00508236	Q7RTQ4,Q7RTQ3,Q9UPN3,Q7RTQ2,P09936,Q7RTQ1,Q7RTQ8,Q7RTQ7,Q9H0B6,Q8IXI2,Q4W5K6,P43034,Q7RTQ0,Q53PC0,P33176,Q96PK2,Q6PEK6,Q2VIQ3,Q7RTQ9,Q59HG1,Q07866,Q2TA90,Q96D84,O95239,Q13696,Q66K46,Q7Z5D5,A6NF62,A8MXL7,Q53QN7,Q6P164,P42704,Q6PKB2,Q8WXY3,Q8WXY4,O60313,A6NFV0,Q7RTP8,A8K1V1,A0PJE3	1611	29	13528	2.89561	1	0.0708518	8.96719
GOTERM_BP_FAT	GO:0008088~axon cargo transport	7	0.368034	0.0147178	Q7RTQ4,Q7RTQ3,Q9UPN3,Q7RTQ2,P09936,Q7RTQ1,Q7RTQ8,Q7RTQ7,Q9H0B6,Q4W5K6,P43034,Q7RTQ0,Q96PK2,Q6PEK6,Q2VIQ3,Q7RTQ9,Q59HG1,Q07866,O95239,Q13696,Q7Z5D5,A6NF62,A8MXL7,Q6PKB2,Q8WXY3,Q8WXY4,O60313,Q7RTP8	1611	18	13528	3.2656	1	0.163036	23.9205
Annotation Cluster 77	Enrichment Score: 2.561714050270859
Category	Term	Count	%	PValue	Genes	List Total	Pop Hits	Pop Total	Fold Enrichment	Bonferroni	Benjamini	FDR
GOTERM_MF_FAT	GO:0008134~transcription factor binding	106	5.57308	5.70244e-08	Q108H6,Q5JSM0,Q5JSM1,Q8NF52,Q92925,P16989,P82094,O15212,Q9H7Z6,Q86V38,Q86TQ3,Q6P0P7,Q6P3S4,Q59G24,Q5HY53,Q92922,Q0EF63,Q59F45,Q2XSC7,Q0EF62,P23396,A6ND53,Q5HY55,Q9Y4A5,Q5HY54,Q8TBS8,Q05BW5,Q2F831,Q56D06,Q00577,Q0IIN7,Q53TX4,Q59EB5,Q13951,Q9UQL6,Q59FP7,Q04206,Q16594,Q5TZP7,Q7Z2V5,Q86W55,P26358,Q92794,Q5U0M2,O75478,Q19RW5,Q92905,O75376,Q15596,Q60FE6,Q92793,Q8NFD5,Q53XI7,P09874,A8MV94,A8K5E3,Q96GV1,…	1596	513	12983	1.68086	7.20192e-05	2.77007e-06	9.27764e-05
GOTERM_BP_FAT	GO:0010604~positive regulation of macromolecule metabolic process	143	7.5184	1.84137e-05	Q5JNW4,P13984,Q6P3S4,Q92922,Q59F45,P28065,A6ND53,Q8NC65,Q8TBS8,A8K6F2,Q53TX4,Q9UGJ0,P14635,Q6NW36,P14317,Q59FP7,Q59GP7,Q49A90,Q5TZP9,Q8TD98,Q53SU9,Q5U0M2,Q9H0N5,Q53XI7,A8MV94,A8K5E3,Q96PN7,P01106,Q6IPL9,Q0VF45,A4LAZ5,A8K6E5,Q57Z54,Q3V793,Q9ULH7,Q969X9,Q8TAQ2,Q6FG89,Q53YJ5,P14921,Q6IT96,P26583,Q7Z5U1,Q5T948,O75586,Q5T949,Q59H39,Q86WG4,Q76L81,Q9NSJ7,Q2TAM6,Q2XN98,Q2TAM5,Q9Y6E3,P31314,Q5H9N4,Q9H4N8,…	1611	857	13528	1.40118	0.0662235	0.000482406	0.0339468
GOTERM_MF_FAT	GO:0003712~transcription cofactor activity	73	3.83807	2.16142e-05	Q5JSM0,Q108H6,Q5JSM1,Q92925,P16989,P82094,O15212,Q86V38,Q6P0P7,Q59G24,Q92922,Q0EF63,Q0EF62,A6ND53,Q9Y4A5,Q8TBS8,Q05BW5,Q56D06,Q0IIN7,Q59EB5,Q13951,Q9UQL6,Q16594,Q5TZP7,Q7Z2V5,Q86W55,Q92794,O75478,O75376,Q92905,Q15596,Q8NFD5,Q92793,Q53XI7,A8K5E3,Q96GV1,Q96GD7,Q96PN7,Q6IPL9,A4LAZ5,Q0VF45,O75381,Q59EQ2,Q6IBA2,Q9ULH7,Q9NX34,Q9NPV6,Q6PJV4,Q8TAQ2,Q13632,Q29RF6,A6NHB0,Q7Z5U1,Q5T6U9,Q9UCH6,Q5T6U8,P52655,…	1596	363	12983	1.63591	0.0269298	0.00075802	0.0351597
GOTERM_MF_FAT	GO:0016563~transcription activator activity	80	4.2061	2.59155e-05	Q108H6,Q92925,O15212,Q495F9,Q6P0P7,Q4W5G3,Q59G24,Q92922,Q59F45,Q0EF63,Q9UJU2,Q0EF62,Q5THS4,A6ND53,Q8NC65,Q9Y4A5,Q14814,Q8TBS8,Q05BW5,A8K6F2,Q0IIN7,Q7Z6E0,Q13951,Q5T9U5,Q5T9U4,Q5T9U6,Q495G0,Q4W5H1,Q59GP7,P55201,Q16594,Q5TZP7,Q86W55,Q659G9,Q53SU9,Q92794,Q92905,Q15596,Q8NFD5,Q92793,Q53XI7,A8MV94,Q9UPH5,A8K5E3,Q96PN7,Q6IPL9,Q0VF45,A4LAZ5,Q6IBA2,Q9ULH7,Q9NX34,Q9NPV6,Q6PJV4,Q8TAQ2,Q6FG89,Q53YJ5,Q13632,…	1596	410	12983	1.58726	0.0322018	0.00086099	0.0421552
GOTERM_MF_FAT	GO:0003713~transcription coactivator activity	47	2.47108	9.3071e-05	A4KYM4,P51531,Q108H6,A4KYM6,Q59EJ8,Q92925,Q6LE77,O15212,Q9Y6Q9,P61457,Q6P0P7,Q05D20,A0JNS3,Q59G24,Q92922,Q0EF63,Q0EF62,Q96JK9,A6ND53,Q9Y4A5,Q6LE81,P06400,Q569F6,Q6LE80,Q7Z7J0,Q8TBS8,Q05BW5,Q59FH1,Q0IIN7,Q6FGB3,Q59GH4,Q6LE82,Q96IW5,Q13951,Q6LE79,Q05BP1,Q16594,Q59HH0,Q5TZP7,Q6DUF0,Q4VBQ6,Q9UPT9,Q86W55,Q05C05,Q92794,Q92905,Q15596,A8K347,Q92793,Q8NFD5,A4D265,A8K5E3,Q9Y2W1,Q96PN7,P53999,Q6IPL9,P23497,…	1596	214	12983	1.7866	0.110908	0.00239619	0.151315
GOTERM_BP_FAT	GO:0051173~positive regulation of nitrogen compound metabolic process	104	5.46793	0.000935348	P23193,Q108H6,A8K6I5,P13984,Q2VPJ6,Q1KLZ6,Q9H7Z6,Q4TZM4,Q6P0P7,Q53F64,Q6P3S4,Q96T37,Q4TWB7,Q92922,Q59F45,Q9UJU2,Q2XSC7,A6ND53,Q8WYH8,Q8NC65,Q8IZI0,Q14473,A8MPV9,Q14477,Q8TBS8,Q05BW5,A8K6F2,Q0IIN7,Q53TX4,Q6J1Z8,Q6J1Z7,Q7Z6E0,Q13951,Q6LEN1,Q86U12,Q8TBA7,Q9UQL6,Q04206,Q59GP7,Q16594,P55201,Q49A90,Q96AM7,Q8TD98,P62633,Q7Z2V5,Q659G9,Q53SU9,Q92794,Q5U0M2,Q9P1Q6,Q19RW5,Q15596,Q9H0N5,Q92793,Q8NFD5,Q53XI7,…	1611	644	13528	1.35608	0.969256	0.0169241	1.71065
GOTERM_BP_FAT	GO:0045941~positive regulation of transcription	92	4.83701	0.00138619	P23193,Q108H6,A8K6I5,P13984,Q1KLZ6,Q9H7Z6,Q6P0P7,Q53F64,Q6P3S4,Q96T37,Q92922,Q59F45,Q9UJU2,Q2XSC7,Q8WYH8,A6ND53,Q8NC65,Q8TBS8,Q05BW5,A8K6F2,Q53TX4,Q0IIN7,Q7Z6E0,Q13951,Q9UQL6,Q04206,Q59GP7,P55201,Q49A90,Q16594,Q8TD98,P62633,Q7Z2V5,Q659G9,Q53SU9,Q92794,Q9P1Q6,Q5U0M2,Q19RW5,Q15596,Q9H0N5,Q8NFD5,Q92793,Q53XI7,A8MV94,A8K5E3,P62979,Q96PN7,Q6IPL9,P01106,A7LNP2,Q0VF45,A4LAZ5,Q57Z54,Q9ULH7,Q9NPV6,Q6PJV4,…	1611	564	13528	1.36977	0.994267	0.0231887	2.52527
GOTERM_BP_FAT	GO:0045935~positive regulation of nucleobase, nucleoside, nucleotide and nucleic acid metabolic process	99	5.20505	0.002228	P23193,Q108H6,A8K6I5,P13984,Q1KLZ6,Q9H7Z6,Q6P0P7,Q53F64,Q6P3S4,Q96T37,Q92922,Q59F45,Q9UJU2,Q2XSC7,Q8WYH8,A6ND53,Q8NC65,Q8TBS8,Q05BW5,A8K6F2,Q0IIN7,Q53TX4,Q7Z6E0,Q13951,Q9UQL6,Q04206,Q59GP7,P55201,Q49A90,Q16594,Q8TD98,P62633,Q7Z2V5,Q659G9,Q53SU9,Q92794,Q5U0M2,Q9P1Q6,Q19RW5,Q15596,Q9H0N5,Q92793,Q8NFD5,Q53XI7,A8MV94,A8K5E3,P62979,Q96PN7,P01106,Q6IPL9,A4LAZ5,Q0VF45,A7LNP2,Q57Z54,Q9ULH7,Q9NPV6,Q969X9,…	1611	624	13528	1.33226	0.999751	0.0352914	4.02927
GOTERM_BP_FAT	GO:0010628~positive regulation of gene expression	93	4.88959	0.00232928	P23193,Q108H6,A8K6I5,P13984,Q1KLZ6,Q9H7Z6,Q6P0P7,Q53F64,Q6P3S4,Q96T37,Q92922,Q59F45,Q9UJU2,Q2XSC7,Q8WYH8,A6ND53,Q8NC65,Q8TBS8,Q05BW5,A8K6F2,Q53TX4,Q0IIN7,Q7Z6E0,Q13951,Q9UQL6,Q59FP7,Q04206,Q59GP7,Q49A90,Q16594,P55201,Q8TD98,P62633,Q7Z2V5,Q659G9,Q53SU9,P26358,Q92794,Q9P1Q6,Q5U0M2,Q19RW5,Q15596,Q9H0N5,Q8NFD5,Q92793,Q53XI7,A8MV94,A8K5E3,P62979,Q96PN7,Q6IPL9,P01106,A7LNP2,Q0VF45,A4LAZ5,Q57Z54,Q9ULH7,…	1611	581	13528	1.34414	0.99983	0.0364036	4.20873
GOTERM_BP_FAT	GO:0031328~positive regulation of cellular biosynthetic process	106	5.57308	0.00343617	P23193,Q108H6,A8K6I5,P13984,Q2VPJ6,Q1KLZ6,Q9H7Z6,Q4TZM4,Q6P0P7,Q53F64,Q6P3S4,Q96T37,Q4TWB7,Q92922,Q59F45,Q9UJU2,Q2XSC7,A6ND53,Q8WYH8,Q8NC65,Q8IZI0,Q14473,Q14477,Q8TBS8,Q05BW5,A8K6F2,Q0IIN7,Q53TX4,Q6J1Z8,Q6J1Z7,Q7Z6E0,Q13951,Q6LEN1,Q86U12,Q8TBA7,Q9UQL6,Q04206,Q59GP7,Q16594,Q49A90,P55201,Q96AM7,Q8TD98,P62633,Q7Z2V5,Q659G9,Q53SU9,Q92794,Q5U0M2,Q9P1Q6,Q19RW5,Q15596,Q9H0N5,Q92793,Q8NFD5,Q53XI7,A8MV94,…	1611	685	13528	1.29943	0.999997	0.0507329	6.1495
GOTERM_BP_FAT	GO:0009891~positive regulation of biosynthetic process	107	5.62566	0.00386482	P23193,Q108H6,A8K6I5,P13984,Q2VPJ6,Q1KLZ6,Q9H7Z6,Q4TZM4,Q6P0P7,Q53F64,Q6P3S4,Q96T37,Q4TWB7,Q92922,Q59F45,Q9UJU2,Q2XSC7,A6ND53,Q8WYH8,Q8NC65,Q8IZI0,Q14473,Q14477,Q8TBS8,Q05BW5,A8K6F2,Q0IIN7,Q53TX4,Q6J1Z8,Q86VS1,Q6J1Z7,Q7Z6E0,Q13951,Q6LEN1,Q86U12,Q8TBA7,Q9UQL6,Q04206,Q59GP7,Q16594,Q49A90,P55201,Q96AM7,Q8TD98,P62633,Q7Z2V5,Q659G9,Q53SU9,Q92794,Q5U0M2,Q9P1Q6,Q19RW5,Q15596,Q9H0N5,Q92793,Q8NFD5,Q53XI7,…	1611	695	13528	1.29282	0.999999	0.0557892	6.89103
GOTERM_BP_FAT	GO:0010557~positive regulation of macromolecule biosynthetic process	100	5.25762	0.00619451	P23193,Q108H6,A8K6I5,P13984,Q1KLZ6,Q9H7Z6,Q6P0P7,Q53F64,Q6P3S4,Q96T37,Q92922,Q59F45,Q9UJU2,Q2XSC7,A6ND53,Q8WYH8,Q8NC65,Q8TBS8,Q05BW5,A8K6F2,Q0IIN7,Q53TX4,Q7Z6E0,Q13951,Q9UQL6,Q04206,Q59GP7,P55201,Q49A90,Q16594,Q8TD98,P62633,Q7Z2V5,Q659G9,Q53SU9,Q92794,Q5U0M2,Q9P1Q6,Q19RW5,Q15596,Q9H0N5,Q92793,Q8NFD5,Q53XI7,A8MV94,A8K5E3,P62979,Q96PN7,P01106,Q6IPL9,A4LAZ5,Q0VF45,A7LNP2,Q57Z54,Q4LE76,Q9ULH7,Q9NPV6,…	1611	654	13528	1.28399	1	0.0812066	10.8253
GOTERM_BP_FAT	GO:0051254~positive regulation of RNA metabolic process	74	3.89064	0.0164971	P23193,Q108H6,A8K6I5,P13984,Q1KLZ6,Q6P0P7,Q53F64,Q6P3S4,Q96T37,Q92922,Q59F45,Q9UJU2,Q2XSC7,A6ND53,Q8NC65,Q05BW5,A8K6F2,Q0IIN7,Q53TX4,Q13951,Q9UQL6,Q04206,Q59GP7,Q16594,Q8TD98,P62633,Q659G9,Q53SU9,Q5U0M2,Q9P1Q6,Q19RW5,Q15596,Q9H0N5,Q8NFD5,Q92793,Q53XI7,A8MV94,A8K5E3,Q96PN7,Q6IPL9,P01106,A7LNP2,Q0VF45,A4LAZ5,Q9ULH7,Q9NPV6,Q6PJV4,Q8TAQ2,Q6FG89,Q53YJ5,P14921,Q9UMN6,Q8WW55,Q6IT96,A7E2E1,P26583,Q7Z5U1,…	1611	481	13528	1.29189	1	0.1784	26.4144
GOTERM_BP_FAT	GO:0045893~positive regulation of transcription, DNA-dependent	73	3.83807	0.019156	P23193,Q108H6,A8K6I5,P13984,Q1KLZ6,Q6P0P7,Q53F64,Q6P3S4,Q96T37,Q92922,Q59F45,Q9UJU2,Q2XSC7,A6ND53,Q8NC65,Q05BW5,A8K6F2,Q0IIN7,Q53TX4,Q13951,Q9UQL6,Q04206,Q59GP7,Q16594,Q8TD98,P62633,Q659G9,Q53SU9,Q5U0M2,Q9P1Q6,Q19RW5,Q15596,Q9H0N5,Q8NFD5,Q92793,Q53XI7,A8MV94,A8K5E3,Q96PN7,Q6IPL9,P01106,A7LNP2,Q0VF45,A4LAZ5,Q9ULH7,Q9NPV6,Q6PJV4,Q8TAQ2,Q6FG89,Q53YJ5,P14921,Q9UMN6,Q8WW55,Q6IT96,A7E2E1,P26583,Q7Z5U1,…	1611	477	13528	1.28512	1	0.201412	29.9973
GOTERM_BP_FAT	GO:0006357~regulation of transcription from RNA polymerase II promoter	98	5.15247	0.119524	P23193,Q108H6,A8K6I5,Q92925,P16989,Q13573,P13984,Q1KLZ6,A7E2B4,Q86V38,P07737,Q6P0P7,Q4W5G3,Q6P3S4,Q59G24,Q96T37,Q92922,Q2HIX7,Q59F45,Q9UJU2,Q2XSC7,Q69YZ5,A6ND53,Q6FHQ0,Q05BW5,Q56D06,O95983,Q59EB5,Q13951,Q6LEN1,Q9UQL6,P52630,Q4W5H1,Q59FP7,Q04206,Q16594,Q96AM7,Q8TD98,P62633,Q86W55,Q659G9,Q53SU9,P26358,Q5U0M2,Q2TSD2,Q19RW5,O75376,Q15596,Q92793,P41223,A8MV94,A8K5E3,Q96GV1,Q96GD7,P01106,A7LNP2,Q6IBA2,…	1611	727	13528	1.13196	1	0.66088	90.4352
GOTERM_BP_FAT	GO:0045944~positive regulation of transcription from RNA polymerase II promoter	49	2.57624	0.278911	P51531,P23193,Q59EJ8,Q108H6,A8K6I5,P13984,Q6LE77,P84022,Q1KLZ6,Q5W0H3,P51532,Q6P0P7,Q9UD59,Q05D20,Q6P3S4,Q96T37,Q59F45,Q9UJU2,Q2XSC7,Q6IC76,Q96JK9,A6ND53,P49715,Q9C0K0,A8K725,Q6LE81,P06400,Q6LE80,Q7Z7J0,Q53QP1,Q59GY7,Q01196,Q6PQC8,Q6PQC7,Q6PQC6,Q53GA5,Q59GH4,Q6LE82,Q13951,Q9UQL6,Q6LE79,Q04206,Q4V760,Q05BP1,Q16594,Q9HB80,Q59HH0,Q6DUF0,Q8TD98,P62633,Q5U0E9,Q86VW9,Q659G9,Q53SU9,Q5U0M2,Q19RW5,P12956,…	1611	371	13528	1.10907	1	0.902794	99.7593
GOTERM_MF_FAT	GO:0030528~transcription regulator activity	182	9.56887	0.666884	Q5JSM0,Q5JSM1,Q92925,Q13573,P13984,O15212,Q32Q12,Q6PKI6,Q6P3S4,Q59G24,Q92922,Q0EF63,Q59F45,Q0EF62,Q5THS4,Q69YZ5,A6ND53,Q8NC65,Q9Y4A5,A2RU75,Q8TBS8,Q56D06,A8K6F2,Q53T94,Q5T9U5,Q02078,Q5T9U4,Q5T9U6,P52630,P14317,Q59GP7,Q49A90,Q5TZP7,Q8TD98,Q53SU9,Q5U0M2,O75478,P22681,Q92905,O75376,Q53XI7,Q96FV9,A8MV94,Q9UPH5,A8K5E3,Q96GV1,Q96PN7,Q1XE77,A8K6E7,Q05DN6,P01106,Q6IPL9,A4D177,A4LAZ5,Q0VF45,O75381,Q59EQ2,…	1596	1512	12983	0.979178	1	0.996039	100
GOTERM_BP_FAT	GO:0051252~regulation of RNA metabolic process	180	9.46372	0.99848	Q5JSM0,Q5JSM1,Q92925,Q13573,P13984,Q9UEL2,Q99414,Q32Q12,Q6PIA1,A8K281,P07737,Q68DF1,Q6PKI6,Q6P3S4,Q05CI5,Q59G24,Q92922,Q0EF63,Q59F45,Q0EF62,Q5THS4,Q69YZ5,Q00839,A6ND53,Q8NC65,Q96SB4,Q56D06,A8K6F2,Q53TX4,O95983,Q32Q22,Q5T9U5,Q02078,Q5T9U4,Q5T9U6,P52630,P14317,Q59FP7,Q59GP7,Q8NC51,Q8TD98,Q53SU9,Q5U0M2,O75376,Q9H0N5,Q53XI7,Q4VBY6,A8MV94,A8K5E3,Q96GV1,P27348,Q05CK9,Q96PN7,Q96L66,Q1XE77,P01106,Q6IPL9,…	1611	1813	13528	0.833706	1	1	100
GOTERM_BP_FAT	GO:0006355~regulation of transcription, DNA-dependent	167	8.78023	0.999883	Q5JSM0,Q5JSM1,Q92925,Q13573,P13984,Q99414,Q32Q12,Q6PIA1,A8K281,P07737,Q68DF1,Q6PKI6,Q6P3S4,Q59G24,Q92922,Q0EF63,Q59F45,Q0EF62,Q5THS4,Q69YZ5,A6ND53,Q8NC65,Q56D06,A8K6F2,Q53TX4,O95983,Q5T9U5,Q02078,Q5T9U4,Q5T9U6,P52630,P14317,Q59FP7,Q59GP7,Q8TD98,Q53SU9,Q5U0M2,O75376,Q9H0N5,Q53XI7,Q4VBY6,A8MV94,A8K5E3,Q96GV1,P27348,Q96PN7,Q96L66,Q1XE77,P01106,Q6IPL9,A4D177,O75381,Q0VF45,A4LAZ5,Q9ULH7,Q5JNZ9,Q8TAQ2,…	1611	1773	13528	0.790944	1	1	100
Annotation Cluster 78	Enrichment Score: 2.5480465943211774
Category	Term	Count	%	PValue	Genes	List Total	Pop Hits	Pop Total	Fold Enrichment	Bonferroni	Benjamini	FDR
GOTERM_MF_FAT	GO:0042802~identical protein binding	114	5.99369	3.31542e-05	Q5JSM0,Q5JSM1,Q8NF52,Q96GX9,Q2VPJ6,Q3KQX8,Q32Q12,Q86TQ3,Q562R8,Q6P3S4,Q59F45,Q2Q9B7,Q6VBB7,A6ND53,Q5TBN4,Q9NTI5,Q13464,Q5TBN3,Q86U12,P21579,Q8NA72,Q6NR85,P13796,Q8TD98,Q53SU9,P52565,Q9UC85,P11766,A8MV94,Q53T61,Q6UB35,Q0ZAI9,Q6IRT1,Q562P0,Q5M7Z9,Q9ULH7,Q53YJ5,Q96FU6,Q6IT96,Q96C61,Q5T948,Q6ZNL4,Q5T949,Q2TAM6,Q9NNW7,Q2TAM5,A8K6C0,Q17RE6,Q9C005,Q562N8,Q5STA2,Q5STA0,P31949,O75592,Q562N0,Q96HX7,Q562N2,…	1596	640	12983	1.449	0.0410098	0.00104631	0.053927
GOTERM_MF_FAT	GO:0042803~protein homodimerization activity	57	2.99685	0.00920264	P08567,Q8NF52,Q12904,Q2VPJ6,O75150,P43034,P84022,Q59GA5,P34913,Q86TQ3,Q6P3S4,Q5HY53,Q59F45,Q2Q9B7,O43707,Q6VBB7,P49715,Q5HY55,Q5HY54,Q8N3W6,Q86T83,P31146,Q53QP1,Q9HAV7,P49589,P06703,Q8N3W7,Q0PHS1,Q01196,Q03504,Q0PHS4,Q6PQC8,Q6PQC7,Q6PQC6,Q8WVW0,Q86U12,Q53GS1,Q8TBA7,Q59EZ6,Q6NR85,Q8TAA5,Q6IQ41,Q86SX1,Q8TAK2,Q6FGQ1,Q9HB80,Q6IAV5,Q8TD98,Q53SU9,A8K4R4,P11388,Q60FE6,A8MWG9,P04040,Q9UC85,Q60FE2,P11766,…	1596	334	12983	1.38826	0.999992	0.128355	13.965
GOTERM_MF_FAT	GO:0046983~protein dimerization activity	79	4.15352	0.0743719	P04114,Q8NF52,A8K7M8,Q2VPJ6,Q32Q15,P43034,O15212,Q05BV1,Q59GA5,Q9NTJ3,Q7Z2X1,Q86TQ3,Q6IAL5,Q6P3S4,Q5HY53,Q13564,Q59F45,Q2Q9B7,Q2XSC7,Q6VBB7,Q5HY55,Q5HY54,Q59HB3,P49589,Q6NSG3,Q0PHS1,Q0PHS4,Q4ZG63,Q8WVW0,Q86U12,Q8TBA7,P67775,Q6NR85,Q8TAA5,Q13789,Q8TD98,Q53SU9,A8K4R4,Q19RW5,Q60FE6,A8MWG9,P04040,Q9UC85,Q60FE2,P11766,A8MV94,Q6UB35,Q60FE5,Q0ZAI9,Q6IRT1,Q6NXF2,Q5M7Z9,P09382,Q8TES4,A7LNP2,Q2TBF3,Q9NX34,…	1596	542	12983	1.18569	1	0.51213	71.5596
Annotation Cluster 79	Enrichment Score: 2.5462312582440894
Category	Term	Count	%	PValue	Genes	List Total	Pop Hits	Pop Total	Fold Enrichment	Bonferroni	Benjamini	FDR
SP_PIR_KEYWORDS	Redox-active center	15	0.788644	2.84182e-05	Q1L6K4,A4QPB4,Q5RZA0,Q1L6K6,Q9NNW7,Q6ZR44,P09622,Q8IZQ5,P13667,Q17RE6,O95831,P30041,Q6VBP2,Q99475,P30044,Q6VBP4,Q6VBP3,Q6VBP5,P30048,Q6VBP9,Q9UDG5,Q9UES8,Q06830,Q5RZ99,Q6M1B7,Q53HC2,Q6YNQ1,Q9BRA2,P00390,Q03504,A8JZY7,Q549T6,A8K7E8,Q6VBQ0,Q6FH60,Q59ET7,P10599,Q16881,Q6FI31,Q6VB42,Q6VB41,Q6VB40,Q99757,Q14579	1895	42	19235	3.62514	0.0178561	0.000253734	0.0422797
INTERPRO	IPR013027:FAD-dependent pyridine nucleotide-disulphide oxidoreductase	9	0.473186	0.000467033	Q1L6K4,A4QPB4,Q0QF12,Q5RZA0,Q1L6K6,Q9NNW7,Q9UHS8,A8MWG9,Q6ZR44,P09622,Q17RE6,O95831,Q8IW48,P31040,Q6VBP2,Q99475,Q6VBP4,Q6VBP3,A8K5J6,Q6VBP5,A8K5A2,Q6VBP9,Q9UES8,Q5RZ99,Q6M1B7,Q12882,Q6YNQ1,Q9Y6N5,P00390,Q59GW8,Q03504,Q53HW7,A2RRQ3,Q6VBQ0,A2RRQ2,Q59ET7,Q16881,Q6FI31,Q6VB42,Q6VB41,Q6VB40	1804	19	16659	4.37423	0.660098	0.0205381	0.813353
INTERPRO	IPR004099:Pyridine nucleotide-disulphide oxidoreductase, dimerisation	6	0.315457	0.000624167	A4QPB4,Q1L6K4,Q5RZA0,Q1L6K6,Q9NNW7,Q6ZR44,P09622,Q17RE6,O95831,Q6VBP2,Q99475,Q6VBP4,Q6VBP3,Q6VBP5,Q6VBP9,Q9UES8,Q5RZ99,Q6M1B7,Q6YNQ1,P00390,Q03504,Q6VBQ0,Q59ET7,Q16881,Q6VB42,Q6FI31,Q6VB41,Q6VB40	1804	8	16659	6.92586	0.763611	0.0245602	1.0856
INTERPRO	IPR001327:Pyridine nucleotide-disulphide oxidoreductase, NAD-binding region	6	0.315457	0.0012791	A4QPB4,Q1L6K4,Q5RZA0,Q1L6K6,Q9NNW7,Q6ZR44,P09622,Q17RE6,O95831,Q6VBP2,Q99475,Q6VBP4,Q6VBP3,Q6VBP5,Q6VBP9,Q9UES8,Q5RZ99,Q6M1B7,Q6YNQ1,P00390,Q03504,Q6VBQ0,Q59ET7,Q16881,Q6VB42,Q6FI31,Q6VB41,Q6VB40	1804	9	16659	6.15632	0.948005	0.0438086	2.21276
GOTERM_MF_FAT	GO:0016668~oxidoreductase activity, acting on sulfur group of donors, NAD or NADP as acceptor	6	0.315457	0.00228447	Q9NNW7,Q6ZR44,P09622,Q17RE6,Q6VBP2,Q99475,Q6VBP4,Q6VBP3,P30048,Q6VBP5,Q6VBP9,Q9UES8,Q6M1B7,Q6YNQ1,Q53HC2,Q9BRA2,P00390,Q03504,A8K7E8,Q6VBQ0,Q59ET7,Q16881,Q6VB42,Q6FI31,Q6VB41,Q6VB40,Q14579	1596	9	12983	5.42314	0.944345	0.0404257	3.65261
INTERPRO	IPR012999:Pyridine nucleotide-disulphide oxidoreductase, class I, active site	4	0.210305	0.0106955	Q6YNQ1,P00390,Q9NNW7,Q03504,Q6ZR44,P09622,Q17RE6,Q6VBP2,Q6VBQ0,Q99475,Q59ET7,Q6VBP4,Q6VBP3,Q6VBP5,Q16881,Q6VBP9,Q6FI31,Q6VB42,Q9UES8,Q6VB41,Q6VB40,Q6M1B7	1804	5	16659	7.38758	1	0.23222	17.1377
INTERPRO	IPR000815:Mercuric reductase	4	0.210305	0.0106955	Q6YNQ1,P00390,Q9NNW7,Q03504,Q6ZR44,P09622,Q17RE6,Q6VBP2,Q6VBQ0,Q99475,Q59ET7,Q6VBP4,Q6VBP3,Q6VBP5,Q16881,Q6VBP9,Q6FI31,Q6VB42,Q9UES8,Q6VB41,Q6VB40,Q6M1B7	1804	5	16659	7.38758	1	0.23222	17.1377
GOTERM_MF_FAT	GO:0016667~oxidoreductase activity, acting on sulfur group of donors	11	0.578339	0.016944	Q1L6K4,A4QPB4,Q2NLC8,Q5RZA0,Q1L6K6,Q9NNW7,Q6P4H0,Q6ZR44,P09622,Q17RE6,O95831,Q6VBP2,Q99475,Q6VBP4,Q6VBP3,Q6FII1,Q6VBP5,P30048,Q6VBP9,Q9UES8,Q5RZ99,Q6M1B7,Q53HC2,Q6YNQ1,Q9BRA2,P00390,Q03504,Q9Y2Q3,A8K7E8,Q6FH60,Q6VBQ0,Q59ET7,Q16881,O76003,Q6FI31,Q6VB42,Q6VB41,Q6VB40,Q99757,Q14579,Q5JV01	1596	39	12983	2.29441	1	0.203235	24.2729
UP_SEQ_FEATURE	binding site:FAD; via amide nitrogen and carbonyl oxygen	3	0.157729	0.258563	O95831,Q1L6K4,A4QPB4,Q5RZA0,Q1L6K6,P09622,Q5RZ99	1886	10	19113	3.04024	1	0.999382	99.6286
Annotation Cluster 80	Enrichment Score: 2.5320438891900996
Category	Term	Count	%	PValue	Genes	List Total	Pop Hits	Pop Total	Fold Enrichment	Bonferroni	Benjamini	FDR
UP_SEQ_FEATURE	compositionally biased region:Arg/Ser-rich (RS domain)	8	0.42061	0.000459871	Q8NB80,P84103,Q59EK7,Q8IV81,Q6NXQ0,P26368,Q6PJF7,Q13247,Q12872,Q564D3,Q53FN0,Q07955,Q8NAK9,Q96HC5,Q59FA2,Q16629,Q13243,Q59GY3,Q86U32,Q59H38,Q01130,Q8N220	1886	16	19113	5.06707	0.858291	0.0375887	0.856651
GOTERM_BP_FAT	GO:0006376~mRNA splice site selection	7	0.368034	0.00361659	Q59EK7,Q8IV81,Q12874,Q6PJF7,Q13247,Q12872,Q07955,Q59FA2,Q13243,Q53HM6,Q59GY3,Q92879,Q86U32,Q15459,Q59H38	1611	14	13528	4.19863	0.999999	0.0529106	6.46229
UP_SEQ_FEATURE	compositionally biased region:Gly-rich (hinge region)	4	0.210305	0.0152382	Q07955,Q8NAK9,Q59FA2,Q6NXQ0,Q59EK7,Q13247,Q13243,Q59GY3,Q53FN0,Q86U32,Q01130,Q8N220	1886	6	19113	6.7561	1	0.459563	24.9645
Annotation Cluster 81	Enrichment Score: 2.5226053806246487
Category	Term	Count	%	PValue	Genes	List Total	Pop Hits	Pop Total	Fold Enrichment	Bonferroni	Benjamini	FDR
SP_PIR_KEYWORDS	pyruvate	9	0.473186	9.36447e-05	Q504U3,P30613,Q3LR79,Q3Y9I8,Q4TZM4,Q9NP11,Q4TWB7,Q8IUL9,Q53GE3,P08559,Q8WUW7,Q8IZI0,P29803,Q14473,Q6R7N2,Q14477,P11498,Q5JPU1,Q5JPU2,Q9P0J1,Q5JPU0,Q6J1Z8,P10515,Q99724,Q5JPU3,Q6J1Z7,Q99725,P11177,Q53H41,Q9UK31,Q01991,Q9HAN0,Q4JLR8,Q6LCA3,Q6P1N1,Q9BWV6,Q6VFQ6,Q53EP3,Q5JPT8,Q5JPT9,Q6VFQ5,P68871,Q9GZL9,Q52MT0,Q16791,Q9NYI7,A6NFK3,A4GX73,Q9BWU5,Q549N7,P78557,Q9UNV7,Q16715,Q9UKK4,Q86YI5,Q16716,P14618,…	1895	17	19235	5.37374	0.0576453	0.000751281	0.139259
KEGG_PATHWAY	hsa00290:Valine, leucine and isoleucine biosynthesis	8	0.42061	0.000453307	Q5TCC4,Q6LCA3,Q5JPT8,Q5JPT9,Q59G75,Q7Z355,Q15031,Q9BQR0,O15382,Q7Z3T4,Q9NP11,Q53GE3,P08559,Q53EW7,P29803,Q5JPU1,Q5JPU2,Q5JPU0,P41252,Q9NSE4,A8KAE9,Q99724,Q5JPU3,P78557,Q99725,Q6P0M4,Q9UNV7,P26640,Q9P1N9,P11177,Q53H41,Q7Z3U5,Q7L4K8	808	11	5085	4.57696	0.0746035	0.00515553	0.552169
SP_PIR_KEYWORDS	thiamine pyrophosphate	7	0.368034	0.000494722	Q6LCA3,Q5TYJ8,Q5JPT8,Q5JPT9,P29401,Q9NP11,Q53GE3,P08559,P51854,A8K089,P29803,Q5JPU1,Q5JPU2,Q53EM5,Q5JPU0,Q99724,Q5JPU3,P78557,Q02218,Q99725,Q9UNV7,P11177,Q53H41,Q6MZE3,Q96HY7,A8K896	1895	12	19235	5.92106	0.269285	0.00319622	0.733655
GOTERM_MF_FAT	GO:0016624~oxidoreductase activity, acting on the aldehyde or oxo group of donors, disulfide as acceptor	6	0.315457	0.00112951	Q6LCA3,Q6LCK9,Q5JPU1,Q5JPU2,Q5JPU0,Q5JPT8,P78557,Q9BQL0,Q99724,Q5JPU3,Q5JPT9,Q99725,Q02218,P21953,Q9UNV7,P11177,Q53H41,Q9NP11,Q53GE3,P08559,Q96HY7,P29803	1596	8	12983	6.10103	0.760063	0.0213948	1.82191
SP_PIR_KEYWORDS	thiamin pyrophosphate	4	0.210305	0.00818251	Q6LCA3,Q5JPU1,Q5JPU2,Q5JPU0,Q99724,Q5JPU3,P78557,Q5JPT8,Q02218,Q99725,Q5JPT9,Q9UNV7,P11177,Q53H41,Q9NP11,Q53GE3,P08559,P29803	1895	5	19235	8.12032	0.994533	0.0408161	11.5083
INTERPRO	IPR001017:Dehydrogenase, E1 component	4	0.210305	0.0196776	Q6LCA3,Q5JPU1,Q5JPU2,Q5JPU0,Q99724,Q5JPU3,P78557,Q5JPT8,Q02218,Q99725,Q5JPT9,Q9UNV7,Q53H41,Q9NP11,Q53GE3,P08559,Q96HY7,P29803	1804	6	16659	6.15632	1	0.351504	29.3508
GOTERM_MF_FAT	GO:0004739~pyruvate dehydrogenase (acetyl-transferring) activity	3	0.157729	0.0415514	Q6LCA3,Q5JPU1,Q5JPU2,Q5JPU0,Q99724,Q5JPU3,P78557,Q5JPT8,Q99725,Q5JPT9,Q9UNV7,P11177,Q53H41,Q9NP11,Q53GE3,P08559,P29803	1596	3	12983	8.13471	1	0.372552	49.866
GOTERM_MF_FAT	GO:0004738~pyruvate dehydrogenase activity	3	0.157729	0.0415514	Q6LCA3,Q5JPU1,Q5JPU2,Q5JPU0,Q99724,Q5JPU3,P78557,Q5JPT8,Q99725,Q5JPT9,Q9UNV7,P11177,Q53H41,Q9NP11,Q53GE3,P08559,P29803	1596	3	12983	8.13471	1	0.372552	49.866
Annotation Cluster 82	Enrichment Score: 2.5207228925022287
Category	Term	Count	%	PValue	Genes	List Total	Pop Hits	Pop Total	Fold Enrichment	Bonferroni	Benjamini	FDR
GOTERM_BP_FAT	GO:0051262~protein tetramerization	15	0.788644	9.03587e-05	Q2XN98,Q3LRW2,Q3LRW1,Q59GA5,Q3LRW5,Q3LRW4,A8K6C0,Q3LRW3,P61457,Q7LDK6,Q71UA4,Q2XSC7,Q9UG59,Q8N3W6,Q4ZJI1,Q1MSW8,Q8N3W7,Q5VSR8,Q6LE88,Q5VSR7,Q9UII2,Q6FGB3,Q8WTZ9,P14735,Q53GA5,Q9UCC0,Q6LEN1,P04637,P09972,Q5JXL8,P08069,Q6IT77,P04179,Q6IAQ7,Q8TAK2,Q1MSX0,Q96AM7,Q7Z7M7,Q7Z7M6,Q01813,Q16698,Q7Z7M5,A4D0W4,Q19RW5,Q7Z7M4,Q9H0N5,Q546H9,Q9UC85,P04040,Q5TCM0,P30566,Q5U0E4,Q9BSL9,Q4FEW1,P51649,P34896,Q9UDR5,…	1611	39	13528	3.22972	0.285548	0.0019417	0.166477
GOTERM_BP_FAT	GO:0051289~protein homotetramerization	10	0.525762	0.0022044	Q7Z7M7,Q7Z7M6,Q01813,Q16698,Q7Z7M5,Q7Z7M4,Q9H0N5,Q546H9,Q59GA5,Q5TCM0,P61457,Q7LDK6,Q9BSL9,Q9UG59,Q8N3W6,Q4ZJI1,P51649,Q8N3W7,P34896,Q5VSR8,Q6LE88,Q9UII2,Q5VSR7,Q6FGB3,P14735,Q8WTZ9,Q6LEN1,Q5JXL8,P09972,Q6LEE0,P04179,Q6LEE2,Q5T5N2,Q6LEE1,Q49A78,Q6IAQ7,Q96AM7	1611	26	13528	3.22972	0.999729	0.0350729	3.9874
GOTERM_BP_FAT	GO:0051259~protein oligomerization	34	1.78759	0.00435833	Q9UHD8,Q59GA5,Q6ICN0,P61457,Q4VY19,P54619,P08758,Q2XSC7,P15056,Q8N3W6,Q8N3W7,Q5VSR8,Q8N7V9,A8K9K2,Q6LE88,Q5VSR7,Q6FGB3,A4D1T4,Q53GA5,Q9UCC0,Q6LEN1,P53041,P23921,P21579,A8MTE3,Q8TAK2,Q96AM7,Q7Z7M7,Q7Z7M6,A5Z1R8,Q01813,A4D0W4,Q19RW5,Q7Z7M5,Q7Z7M4,P54132,Q9H0N5,Q9UC85,P04040,P30566,Q59EY4,Q2TNI1,O75381,Q59EQ2,Q5U0E4,Q9NX34,P51649,Q53GZ5,Q3B7X0,Q8TC62,Q9UDR5,P54646,Q49A78,Q5T5N2,Q0PKT5,Q9BTI9,Q4VY20,…	1611	174	13528	1.64085	1	0.0617477	7.73791
GOTERM_BP_FAT	GO:0051260~protein homooligomerization	17	0.893796	0.0951762	Q6FHV0,P14174,Q59GA5,Q03135,Q6DD88,P61457,Q7LDK6,P08758,Q8N3W6,Q9UG59,Q4ZJI1,Q8N3W7,Q5VSR8,Q9UII2,Q5VSR7,Q6LE88,Q6FGB3,P14735,Q8WTZ9,Q5JXL8,P09972,Q6LEN1,Q6AI31,P21579,A8MTE3,P04179,Q6IAQ7,Q96AM7,Q7Z7M7,Q7Z7M6,Q16698,Q01813,A5Z1R8,Q7Z7M5,Q7Z7M4,Q9H0N5,Q546H9,Q5TCM0,Q8NHH9,Q2TNI1,O75381,Q9BSL9,Q6FHB3,P51649,P34896,Q6LEE0,Q6LEE2,Q5T5N2,Q49A78,Q6LEE1	1611	95	13528	1.50267	1	0.588605	84.1837
Annotation Cluster 83	Enrichment Score: 2.5158695878312582
Category	Term	Count	%	PValue	Genes	List Total	Pop Hits	Pop Total	Fold Enrichment	Bonferroni	Benjamini	FDR
GOTERM_CC_FAT	GO:0045239~tricarboxylic acid cycle enzyme complex	6	0.315457	0.000308167	Q6IBS5,Q86SW4,Q5VVL7,Q6LCK9,Q6FGL4,Q7LDY7,P53597,P11182,Q9BQL0,P21953,O14874,Q96G95,Q16187,Q6IAL5,A8MY43,Q86TW7,P07954,Q86TQ8,P36957,Q5VVL8,Q6LEQ7	1438	7	12782	7.61892	0.182808	0.0026528	0.459612
GOTERM_CC_FAT	GO:0030062~mitochondrial tricarboxylic acid cycle enzyme complex	5	0.262881	0.00197897	Q6IBS5,Q86SW4,Q5VVL7,Q6LCK9,Q6FGL4,Q7LDY7,P53597,P11182,Q9BQL0,P21953,O14874,Q96G95,Q16187,Q6IAL5,A8MY43,Q86TW7,Q86TQ8,P36957,Q5VVL8,Q6LEQ7	1438	6	12782	7.40728	0.726788	0.0148032	2.91738
GOTERM_CC_FAT	GO:0005947~mitochondrial alpha-ketoglutarate dehydrogenase complex	4	0.210305	0.0119028	Q86SW4,Q6IBS5,Q5VVL7,Q6LCK9,Q6FGL4,Q7LDY7,P11182,Q9BQL0,P21953,O14874,Q96G95,Q16187,A8MY43,Q86TW7,Q86TQ8,P36957,Q5VVL8,Q6LEQ7	1438	5	12782	7.11099	0.999608	0.0694272	16.387
GOTERM_CC_FAT	GO:0045240~dihydrolipoyl dehydrogenase complex	4	0.210305	0.0119028	Q86SW4,Q6IBS5,Q5VVL7,Q6LCK9,Q6FGL4,Q7LDY7,P11182,Q9BQL0,P21953,O14874,Q96G95,Q16187,A8MY43,Q86TW7,Q86TQ8,P36957,Q5VVL8,Q6LEQ7	1438	5	12782	7.11099	0.999608	0.0694272	16.387
Annotation Cluster 84	Enrichment Score: 2.5046618225709274
Category	Term	Count	%	PValue	Genes	List Total	Pop Hits	Pop Total	Fold Enrichment	Bonferroni	Benjamini	FDR
UP_SEQ_FEATURE	binding site:Substrate; via amide nitrogen	12	0.630915	3.66584e-06	P49748,A8K512,A5Z1R8,Q504U3,Q6FHV0,P30613,P42126,P14174,Q96DC0,P45954,A8K6Y3,P11310,A8K745,Q9NYI7,Q53HR2,A6NFK3,Q58EZ5,Q8WUW7,Q08426,Q13011,Q5T4U4,Q53GZ5,Q5T4U5,P23921,Q16715,Q6NVY1,Q5SQN6,Q9UK31,Q9UKK4,Q16716,P30084,P14618,Q5HYG7	1886	23	19113	5.28738	0.0154519	0.000676836	0.00685636
GOTERM_MF_FAT	GO:0004300~enoyl-CoA hydratase activity	5	0.262881	0.00277179	A8K6Y3,Q53T69,Q9UQC5,P30084,A8K745,P55084,P40939,Q13011,Q53TA2,Q9T2V8,Q58EZ5,Q08426	1596	6	12983	6.77893	0.969972	0.0468875	4.4154
INTERPRO	IPR001753:Crotonase, core	7	0.368034	0.00336016	A8K512,O75521,Q53T69,P42126,Q9UQC5,Q9NYD2,Q13011,Q53TA2,Q53GC8,Q96DC0,Q6IBN4,Q53HG3,A8K6Y3,Q7L124,Q6NVY1,P30084,Q5JYK7,A8K745,P40939,Q59E94,Q58EZ5,Q08426	1804	15	16659	4.30942	0.99958	0.0937302	5.71449
INTERPRO	IPR018376:Enoyl-CoA hydratase/isomerase, conserved site	6	0.315457	0.00389402	A8K512,Q53T69,Q9UQC5,P42126,Q53TA2,Q13011,Q96DC0,A8K6Y3,Q6NVY1,P30084,P40939,A8K745,Q58EZ5,Q08426	1804	11	16659	5.03699	0.999878	0.105302	6.59356
KEGG_PATHWAY	hsa00903:Limonene and pinene degradation	6	0.315457	0.0574212	A8K6Y3,A6H8Z7,Q53T69,P49189,Q9UQC5,P30084,P40939,Q53TA2,Q6P4J0,Q58EZ5,Q6UWP7,Q08426	808	14	5085	2.69714	0.999959	0.278339	51.4298
KEGG_PATHWAY	hsa00410:beta-Alanine metabolism	7	0.368034	0.122819	Q12882,Q53T69,Q9UQC5,Q5T4U4,Q53TA2,A8MWG9,Q5T4U5,A8K6Y3,A2RRQ3,A2RRQ2,P11310,Q6NVY1,P49189,P30084,P40939,A8K5A2,Q58EZ5,Q08426,Q5HYG7	808	22	5085	2.00242	1	0.437052	79.8159
Annotation Cluster 85	Enrichment Score: 2.5041505772144097
Category	Term	Count	%	PValue	Genes	List Total	Pop Hits	Pop Total	Fold Enrichment	Bonferroni	Benjamini	FDR
INTERPRO	IPR002155:Thiolase	6	0.315457	0.00025706	P24752,Q59HG9,P42765,Q59GW6,A6NM69,Q5VVZ1,Q6NXF4,Q71UF1,P22307,Q96FG8,Q9BWD1,P55084,Q9T2V8,Q99798	1804	7	16659	7.91527	0.447823	0.0137164	0.448454
PIR_SUPERFAMILY	PIRSF000429:Ac-CoA_Ac_transf	6	0.315457	0.000657601	P24752,Q59HG9,P42765,Q59GW6,A6NM69,Q5VVZ1,Q6NXF4,Q71UF1,P22307,Q96FG8,Q9BWD1,P55084,Q9T2V8,Q99798	976	7	7396	6.49532	0.439474	0.109325	1.01718
INTERPRO	IPR016038:Thiolase-like, subgroup	6	0.315457	0.0012791	P24752,Q59HG9,P42765,Q6PJJ3,Q9NWU1,P49327,Q59GW6,A6NM69,Q5VVZ1,Q4LE83,Q6NXF4,P22307,Q96FG8,Q9BWD1,Q13587	1804	9	16659	6.15632	0.948005	0.0438086	2.21276
UP_SEQ_FEATURE	active site:Acyl-thioester intermediate	4	0.210305	0.036707	P24752,Q96FG8,P42765,Q9BWD1,P55084,Q9T2V8,Q59GW6	1886	8	19113	5.06707	1	0.739803	50.3159
GOTERM_MF_FAT	GO:0016408~C-acyltransferase activity	6	0.315457	0.0379836	P24752,Q59HG9,Q53T69,P42765,Q9UQC5,Q53TA2,Q59GW6,A6NM69,Q5VVZ1,Q6NXF4,Q96FG8,P22307,Q9BWD1,P40939,P55084,Q9T2V8	1596	16	12983	3.05052	1	0.353822	46.7419
Annotation Cluster 86	Enrichment Score: 2.495227538042331
Category	Term	Count	%	PValue	Genes	List Total	Pop Hits	Pop Total	Fold Enrichment	Bonferroni	Benjamini	FDR
UP_SEQ_FEATURE	domain:G-patch	9	0.473186	0.00111325	Q9BTX0,Q9UKJ3,Q9NTB1,Q6PKE0,Q7Z3D7,P98175,P18583,Q5W009,A8K0D9,Q6ZRV7,Q8N954,Q6PIK7,Q96I25,Q5JRR2,Q59ET1,Q8IWX8,P52756,Q6PKH5,Q8N1G2,Q9BTE4,Q5W010,Q5W011,Q8TB99,Q8N302,Q3SWV4	1886	23	19113	3.96554	0.991189	0.0746368	2.06182
SMART	SM00443:G_patch	8	0.42061	0.00434006	P18583,Q5W009,A8K0D9,Q6ZRV7,Q8N954,Q96I25,Q6PIK7,Q5JRR2,Q59ET1,Q8IWX8,Q9BTX0,P52756,Q6PKH5,Q9BTE4,Q8N1G2,Q9NTB1,Q5W010,Q5W011,Q8N302,Q6PKE0,Q7Z3D7,P98175,Q3SWV4	909	22	9079	3.63196	0.71673	0.0456425	5.6182
INTERPRO	IPR000467:D111/G-patch	8	0.42061	0.00676442	P18583,Q5W009,A8K0D9,Q6ZRV7,Q8N954,Q96I25,Q6PIK7,Q5JRR2,Q59ET1,Q8IWX8,Q9BTX0,P52756,Q6PKH5,Q9BTE4,Q8N1G2,Q9NTB1,Q5W010,Q5W011,Q8N302,Q6PKE0,Q7Z3D7,P98175,Q3SWV4	1804	22	16659	3.35799	1	0.161522	11.1891
Annotation Cluster 87	Enrichment Score: 2.494293742810267
Category	Term	Count	%	PValue	Genes	List Total	Pop Hits	Pop Total	Fold Enrichment	Bonferroni	Benjamini	FDR
SMART	SM00384:AT_hook	11	0.578339	0.000164187	Q566Q2,Q8TD98,Q9BVI0,Q6N019,Q7Z5E2,Q8NEZ4,A6NGM0,Q9UPD0,Q6IPL9,Q9ULL5,Q9NTI5,A8MSG9,Q59FF2,Q66K49,P17096,Q9UMN6,Q8NFC6,Q49A26,Q03164,Q9HBJ3,Q9HBJ4,Q75MN6,P51608,Q5T6U9,Q5T6U8,Q8WYP5,Q9HB80,Q59FJ6,A7E235	909	27	9079	4.06914	0.0465023	0.00264196	0.218049
INTERPRO	IPR017956:AT hook, DNA-binding, conserved site	11	0.578339	0.000319997	Q566Q2,Q8TD98,Q9BVI0,Q6N019,Q7Z5E2,Q8NEZ4,A6NGM0,Q9UPD0,Q6IPL9,Q9ULL5,Q9NTI5,A8MSG9,Q59FF2,Q66K49,P17096,Q9UMN6,Q8NFC6,Q49A26,Q03164,Q9HBJ3,Q9HBJ4,Q75MN6,P51608,Q5T6U9,Q5T6U8,Q8WYP5,Q9HB80,Q59FJ6,A7E235	1804	27	16659	3.7622	0.522557	0.0159435	0.557959
UP_SEQ_FEATURE	DNA-binding region:A.T hook 1	6	0.315457	0.00406064	Q8TD98,Q9ULL5,Q9NTI5,Q59FF2,Q9UMN6,P17096,Q03164,Q9HBJ3,Q9HBJ4,P51608,Q5T6U9,Q9UPD0,Q5T6U8,Q6IPL9,Q9HB80,Q59FJ6	1886	12	19113	5.06707	1	0.182075	7.32809
UP_SEQ_FEATURE	DNA-binding region:A.T hook 2	6	0.315457	0.00406064	Q8TD98,Q9ULL5,Q9NTI5,Q59FF2,Q9UMN6,P17096,Q03164,Q9HBJ3,Q9HBJ4,P51608,Q5T6U9,Q9UPD0,Q5T6U8,Q6IPL9,Q9HB80,Q59FJ6	1886	12	19113	5.06707	1	0.182075	7.32809
UP_SEQ_FEATURE	DNA-binding region:A.T hook	5	0.262881	0.0244402	Q566Q2,A8MSG9,Q66K49,Q8NFC6,Q49A26,Q9BVI0,Q6N019,Q75MN6,Q7Z5E2,Q8NEZ4,A6NGM0,Q8WYP5,A7E235	1886	12	19113	4.22256	1	0.612078	37.0486
UP_SEQ_FEATURE	DNA-binding region:A.T hook 3	4	0.210305	0.0511046	Q8TD98,Q9NTI5,Q59FF2,Q9UMN6,P17096,Q03164,Q9HBJ3,Q9HBJ4,Q5T6U9,Q9UPD0,Q5T6U8,Q6IPL9,Q9HB80	1886	9	19113	4.50407	1	0.827026	62.512
Annotation Cluster 88	Enrichment Score: 2.4660477373597445
Category	Term	Count	%	PValue	Genes	List Total	Pop Hits	Pop Total	Fold Enrichment	Bonferroni	Benjamini	FDR
SMART	SM00387:HATPase_c	11	0.578339	0.000442579	Q9H6Q2,P11388,Q2VPJ6,Q8WTY5,Q58FG0,Q96G95,Q9H6X9,P07900,Q58FF8,Q58FF7,A8MY43,O75141,Q9BV61,Q96HX7,Q14568,Q9UG39,Q53G55,Q02880,Q53FS6,Q59EK6,Q6FGL4,Q6W6M6,Q71UH4,Q6LC06,A8K500,Q9Y6X9,O14874,Q12931,Q6PK50,Q5CAQ4,Q59H80,Q86U12,P08238,Q8TBA7,Q8N9Z3,Q86SX1,Q6ZTQ8,Q6LBI8,Q6AHX6	909	30	9079	3.66223	0.120478	0.00639826	0.586763
INTERPRO	IPR001404:Heat shock protein Hsp90	7	0.368034	0.000826109	Q53G55,Q53FS6,Q59EK6,Q2VPJ6,A8K500,Q58FG0,Q12931,Q6PK50,Q5CAQ4,Q9H6X9,P07900,Q86U12,Q58FF9,Q58FF8,Q58FF7,P08238,Q8TBA7,Q9BV61,Q96HX7,Q8N9Z3,Q86SX1,Q14568	1804	12	16659	5.38678	0.851787	0.0303227	1.43445
INTERPRO	IPR003594:ATP-binding region, ATPase-like	11	0.578339	0.00084142	Q9H6Q2,P11388,Q2VPJ6,Q8WTY5,Q58FG0,Q96G95,Q9H6X9,P07900,Q58FF8,Q58FF7,A8MY43,O75141,Q9BV61,Q96HX7,Q14568,Q9UG39,Q53G55,Q02880,Q53FS6,Q59EK6,Q6FGL4,Q6W6M6,Q71UH4,Q6LC06,A8K500,Q9Y6X9,O14874,Q12931,Q6PK50,Q5CAQ4,Q59H80,Q86U12,P08238,Q8TBA7,Q8N9Z3,Q86SX1,Q6ZTQ8,Q6LBI8,Q6AHX6	1804	30	16659	3.38598	0.856941	0.0303936	1.46085
PIR_SUPERFAMILY	PIRSF002583:Hsp90	6	0.315457	0.00915809	Q53G55,Q53FS6,Q59EK6,Q2VPJ6,A8K500,Q58FG0,Q12931,Q5CAQ4,P07900,Q86U12,Q58FF9,Q58FF8,Q58FF7,Q8TBA7,Q9BV61,Q96HX7,Q8N9Z3,Q86SX1,Q14568	976	11	7396	4.13338	0.999695	0.490684	13.3239
INTERPRO	IPR019805:Heat shock protein Hsp90, conserved site	4	0.210305	0.0106955	Q53G55,Q53FS6,Q59EK6,Q2VPJ6,A8K500,Q12931,Q6PK50,Q5CAQ4,Q9H6X9,P07900,Q86U12,Q58FF8,P08238,Q8TBA7,Q9BV61,Q96HX7,Q8N9Z3,Q86SX1,Q14568	1804	5	16659	7.38758	1	0.23222	17.1377
PIR_SUPERFAMILY	PIRSF002583:heat shock protein, HSP90/HTPG types	4	0.210305	0.0530477	Q53G55,Q53FS6,Q59EK6,Q2VPJ6,A8K500,Q12931,Q6PK50,Q5CAQ4,Q9H6X9,P07900,Q86U12,Q58FF7,P08238,Q8TBA7,Q9BV61,Q96HX7,Q8N9Z3,Q86SX1,Q14568	976	7	7396	4.33021	1	0.909127	57.1365
Annotation Cluster 89	Enrichment Score: 2.4458647922767534
Category	Term	Count	%	PValue	Genes	List Total	Pop Hits	Pop Total	Fold Enrichment	Bonferroni	Benjamini	FDR
GOTERM_CC_FAT	GO:0005657~replication fork	14	0.736067	1.92217e-05	Q2NLC9,Q92769,Q2XN98,Q3LRW2,Q3LRW1,P35249,Q3LRW5,Q3LRW4,A8K001,Q3LRW3,Q14756,P35250,P35251,Q5U0C2,Q2XSC7,Q8NHX6,Q00577,Q1MSW8,Q5U0P9,Q9NPF5,Q53GA5,Q6FI35,P04637,Q53HJ4,Q6IT77,Q6FHF5,Q7Z6A3,Q7Z6A1,Q7Z6A2,Q2NLD4,Q75MT5,Q1MSX0,A8K0Y9,Q19RW5,P54132,Q5TG36,Q5TG38,Q56A79,A8K6E7,Q53HK8,P12004,Q5U0E4,P16104,P27694,Q5TG40,Q4FEW1,Q7Z6P5,Q3B7X0,A6NHB0,P25205,Q9NRG0,Q5W0E8,P40938,Q0PKT5	1438	32	12782	3.88882	0.0125114	0.000185135	0.0287258
GOTERM_BP_FAT	GO:0006289~nucleotide-excision repair	17	0.893796	0.000477228	Q16531,Q68CN2,Q2XN98,Q3LRW2,Q3LRW1,P35249,Q3LRW5,Q3LRW4,Q3LRW3,Q14756,P35250,P35251,Q92466,Q5U0C2,Q9HD60,Q308M6,Q2XSC7,Q7Z5K8,Q9HCS7,Q9NR54,Q1MSW8,Q53GA5,P54727,Q6FI35,P04637,Q6IT77,A6NG77,Q6FHF5,P54725,P28715,A8K111,Q7Z6A3,Q7Z6A1,Q7Z6A2,Q75MT5,Q1MSX0,Q92889,Q53F10,A8K0Y9,Q19RW5,Q5M7Z1,P28340,Q59EU8,A8K6E7,Q53HK8,P12004,Q5U0E4,Q5W0S5,Q96T76,P27694,Q5W0S4,Q4FEW1,Q71SV8,Q5W0E8,A6NGT4,Q5JUS5,P40938,…	1611	55	13528	2.59552	0.830718	0.0090673	0.876287
KEGG_PATHWAY	hsa03430:Mismatch repair	11	0.578339	0.00151928	Q75MV9,P52701,A8K0Y9,Q3SWU9,P35249,Q0ZAI9,Q14756,Q53RU4,P35250,P35251,P28340,Q5U0C2,A8K6E7,Q53HK8,Q308M6,Q6VBB7,P12004,P27694,Q567R6,Q1L838,Q9UQ84,Q5T399,Q6FI35,Q5W0E8,Q04837,Q53GS1,A4D1U3,Q6FHF5,Q53FK0,P40938,Q7Z6A3,P43246,Q7Z6A1,Q7Z6A2,Q75MT5	808	23	5085	3.00985	0.228945	0.0135908	1.83962
GOTERM_CC_FAT	GO:0005663~DNA replication factor C complex	5	0.262881	0.00197897	P35249,Q6FI35,Q14756,Q5W0E8,P35250,P35251,Q6FHF5,Q5U0C2,P40938,A8K6E7,Q53HK8,Q7Z6A3,Q7Z6A1,Q7Z6A2,P12004,Q75MT5	1438	6	12782	7.40728	0.726788	0.0148032	2.91738
GOTERM_BP_FAT	GO:0006297~nucleotide-excision repair, DNA gap filling	7	0.368034	0.0108878	P27694,A8K0Y9,P35249,Q6FI35,Q14756,Q5W0E8,P35250,P35251,P28340,Q6FHF5,Q5U0C2,P40938,A8K6E7,Q53HK8,Q7Z6A3,Q308M6,Q7Z6A1,Q7Z6A2,P12004,Q75MT5	1611	17	13528	3.4577	1	0.128977	18.2787
GOTERM_MF_FAT	GO:0003689~DNA clamp loader activity	4	0.210305	0.0152728	Q14756,Q5W0E8,P35250,P35251,Q5U0C2,P40938,A8K6E7,Q53HK8,P35249,Q75MT5	1596	5	12983	6.50777	1	0.188616	22.151
GOTERM_MF_FAT	GO:0033170~protein-DNA loading ATPase activity	4	0.210305	0.0152728	Q14756,Q5W0E8,P35250,P35251,Q5U0C2,P40938,A8K6E7,Q53HK8,P35249,Q75MT5	1596	5	12983	6.50777	1	0.188616	22.151
KEGG_PATHWAY	hsa03420:Nucleotide excision repair	14	0.736067	0.0159706	Q16531,Q92889,Q53F10,A8K0Y9,P35249,Q5M7Z1,Q14756,P35250,P35251,Q92466,P28340,Q59EU8,Q5U0C2,A8K6E7,Q9HD60,Q53HK8,Q308M6,Q13619,P12004,Q7Z5K8,Q5W0S5,P27694,Q5W0S4,Q9NR54,A2A2W2,P54727,Q6FI35,Q5W0E8,A6NGT4,A6NG77,P54725,Q6FHF5,Q5JUS5,P28715,P40938,A8K111,Q7Z6A3,Q7Z6A1,Q75MT5,Q7Z6A2	808	44	5085	2.00242	0.936264	0.104274	17.8485
PIR_SUPERFAMILY	PIRSF004274:phage T4 DNA polymerase accessory protein 44	3	0.157729	0.0868011	Q5W0E8,P35250,Q5U0C2,P40938,Q53HK8,P35249,Q75MT5	976	4	7396	5.6834	1	0.969012	75.6163
Annotation Cluster 90	Enrichment Score: 2.40508887779715
Category	Term	Count	%	PValue	Genes	List Total	Pop Hits	Pop Total	Fold Enrichment	Bonferroni	Benjamini	FDR
GOTERM_BP_FAT	GO:0006401~RNA catabolic process	20	1.05152	0.000135852	Q15287,P60228,Q09161,Q9H0D6,Q59EJ3,A8K9J2,P29728,Q147Y3,Q6FHX6,Q15164,Q7KZX8,O95453,P61221,Q6FG33,P08107,A8K5W9,Q8TCS8,Q3B867,Q96Q15,P38919,P15170,Q99575,Q96GF2,Q59GZ7,Q6IQ30,Q96F88,Q9UQC1,Q5T7X2,P52298,Q13310,Q9UCE8,P39748,Q53G42,Q6IBQ2,Q53GL4,A8K1P0,Q96C86,Q15024,Q12771,Q8WVK4,Q14103,P61326,Q6IAX5,A8K9T1,A8K5I0	1611	65	13528	2.58378	0.396821	0.00285209	0.250195
GOTERM_BP_FAT	GO:0006402~mRNA catabolic process	13	0.683491	0.00347292	Q15287,P60228,Q09161,Q59EJ3,A8K9J2,Q7KZX8,O95453,Q6FG33,P08107,Q8TCS8,Q96Q15,P15170,P38919,Q96GF2,Q9UQC1,Q5T7X2,P52298,Q9UCE8,Q53G42,Q6IBQ2,A8K1P0,Q12771,Q96C86,Q8WVK4,Q14103,P61326,Q6IAX5,A8K5I0	1611	43	13528	2.53871	0.999998	0.0510602	6.2133
GOTERM_BP_FAT	GO:0000184~nuclear-transcribed mRNA catabolic process, nonsense-mediated decay	10	0.525762	0.00650783	Q15287,P60228,Q09161,Q5T7X2,P52298,Q7KZX8,Q53G42,O95453,Q6IBQ2,Q6FG33,A8K1P0,Q96C86,Q8WVK4,Q96Q15,P38919,P15170,P61326,Q96GF2,Q6IAX5	1611	30	13528	2.79909	1	0.0848498	11.3423
SP_PIR_KEYWORDS	nonsense-mediated mrna decay	8	0.42061	0.0164801	O95453,Q15287,Q6IBQ2,Q09161,Q5T7X2,A8K1P0,P52298,Q96C86,Q96Q15,P38919,P61326,Q53G42	1895	28	19235	2.90011	0.999973	0.0756115	21.9077
GOTERM_BP_FAT	GO:0000956~nuclear-transcribed mRNA catabolic process	10	0.525762	0.0186379	Q15287,P60228,Q09161,Q5T7X2,P52298,Q7KZX8,Q53G42,O95453,Q6IBQ2,Q6FG33,A8K1P0,Q96C86,Q8WVK4,Q96Q15,P38919,P15170,P61326,Q96GF2,Q6IAX5	1611	35	13528	2.39922	1	0.197043	29.3122
Annotation Cluster 91	Enrichment Score: 2.3648342931661515
Category	Term	Count	%	PValue	Genes	List Total	Pop Hits	Pop Total	Fold Enrichment	Bonferroni	Benjamini	FDR
UP_SEQ_FEATURE	repeat:1-2	11	0.578339	0.000102435	Q45RF0,P27797,Q05BK4,P31943,Q6IBM4,Q4LE37,A1L400,Q05CK9,Q6ZP56,Q6PKE0,Q8MGQ9,Q9BUJ2,O60506,Q6IAT4,P18583,P27824,Q712V1,Q6ZRV7,P22314,Q53G20,P49454,Q53G71,Q6IPH7,P55795,Q5JRR8,Q68DG4,Q5JRR6,P48634,P50914,Q5TCG3,Q59GL1,Q5TCG1,Q3SWV4	1886	26	19113	4.28752	0.352843	0.0120152	0.191421
UP_SEQ_FEATURE	repeat:1-1	11	0.578339	0.000148374	Q45RF0,P27797,Q05BK4,P31943,Q6IBM4,Q4LE37,A1L400,Q05CK9,Q6ZP56,Q6PKE0,Q8MGQ9,Q9BUJ2,O60506,Q6IAT4,P18583,P27824,Q712V1,Q6ZRV7,P22314,Q53G20,P49454,Q53G71,Q6IPH7,P55795,Q5JRR8,Q68DG4,Q5JRR6,P48634,P50914,Q5TCG3,Q59GL1,Q5TCG1,Q3SWV4	1886	27	19113	4.12873	0.467589	0.0160326	0.277154
UP_SEQ_FEATURE	repeat:2-1	9	0.473186	0.00205335	Q45RF0,P27797,Q05BK4,P31943,Q6IBM4,Q4LE37,A1L400,Q05CK9,Q6ZP56,Q6PKE0,Q8MGQ9,O60506,Q6IAT4,P18583,P27824,Q6ZRV7,Q53G20,P49454,Q53G71,Q6IPH7,P55795,Q68DG4,P48634,P50914,Q5TCG3,Q59GL1,Q5TCG1,Q3SWV4	1886	25	19113	3.64829	0.999839	0.117271	3.77158
UP_SEQ_FEATURE	repeat:2-2	9	0.473186	0.00352623	Q45RF0,P27797,Q05BK4,P31943,Q6IBM4,Q4LE37,A1L400,Q05CK9,Q6ZP56,Q6PKE0,Q8MGQ9,O60506,Q6IAT4,P18583,P27824,Q6ZRV7,Q53G20,P49454,Q53G71,Q6IPH7,P55795,Q68DG4,P48634,P50914,Q5TCG3,Q59GL1,Q5TCG1,Q3SWV4	1886	27	19113	3.37805	1	0.165393	6.39358
UP_SEQ_FEATURE	repeat:1-4	7	0.368034	0.00433529	Q6IAT4,P27824,P18583,Q45RF0,Q6ZRV7,P27797,Q05BK4,Q53G20,Q53G71,Q6IPH7,Q4LE37,Q05CK9,Q6ZP56,P48634,P50914,Q6PKE0,Q8MGQ9,Q59GL1,Q5TCG3,Q9BUJ2,Q5TCG1,Q3SWV4,O60506	1886	17	19113	4.17288	1	0.19115	7.80494
UP_SEQ_FEATURE	repeat:1-3	7	0.368034	0.00596711	Q6IAT4,P27824,P18583,Q45RF0,Q6ZRV7,P27797,Q05BK4,Q53G20,Q53G71,Q6IPH7,Q4LE37,Q05CK9,Q6ZP56,P48634,P50914,Q6PKE0,Q8MGQ9,Q59GL1,Q5TCG3,Q9BUJ2,Q5TCG1,Q3SWV4,O60506	1886	18	19113	3.94106	1	0.241453	10.5905
UP_SEQ_FEATURE	repeat:1-5	3	0.157729	0.182786	P18583,Q05CK9,Q6ZRV7,Q6PKE0,Q5TCG3,Q59GL1,Q9BUJ2,Q5TCG1,Q3SWV4,O60506	1886	8	19113	3.8003	1	0.995451	97.7074
UP_SEQ_FEATURE	repeat:2-3	4	0.210305	0.23175	Q6IAT4,P18583,P27824,Q6ZRV7,P27797,Q53G71,Q05CK9,Q6ZP56,Q6PKE0,Q59GL1,Q5TCG3,Q5TCG1,O60506,Q3SWV4	1886	17	19113	2.38451	1	0.998777	99.2782
Annotation Cluster 92	Enrichment Score: 2.3401446814828857
Category	Term	Count	%	PValue	Genes	List Total	Pop Hits	Pop Total	Fold Enrichment	Bonferroni	Benjamini	FDR
KEGG_PATHWAY	hsa00290:Valine, leucine and isoleucine biosynthesis	8	0.42061	0.000453307	Q5TCC4,Q6LCA3,Q5JPT8,Q5JPT9,Q59G75,Q7Z355,Q15031,Q9BQR0,O15382,Q7Z3T4,Q9NP11,Q53GE3,P08559,Q53EW7,P29803,Q5JPU1,Q5JPU2,Q5JPU0,P41252,Q9NSE4,A8KAE9,Q99724,Q5JPU3,P78557,Q99725,Q6P0M4,Q9UNV7,P26640,Q9P1N9,P11177,Q53H41,Q7Z3U5,Q7L4K8	808	11	5085	4.57696	0.0746035	0.00515553	0.552169
INTERPRO	IPR002300:Aminoacyl-tRNA synthetase, class Ia	4	0.210305	0.0106955	Q5TCC4,Q9NSE4,P41252,A8KAE9,Q6P0M4,Q59G75,Q7Z355,Q9BQR0,Q15031,P26640,Q9P1N9,Q7Z3T4,Q7Z3U5,Q7L4K8	1804	5	16659	7.38758	1	0.23222	17.1377
INTERPRO	IPR013155:Valyl/Leucyl/Isoleucyl-tRNA synthetase, class I, anticodon-binding	4	0.210305	0.0196776	Q5TCC4,Q9NSE4,P41252,A8KAE9,Q6P0M4,Q59G75,Q7Z355,Q9BQR0,Q15031,P26640,Q9P1N9,Q7Z3T4,Q7Z3U5,Q7L4K8	1804	6	16659	6.15632	1	0.351504	29.3508
Annotation Cluster 93	Enrichment Score: 2.3258708090501856
Category	Term	Count	%	PValue	Genes	List Total	Pop Hits	Pop Total	Fold Enrichment	Bonferroni	Benjamini	FDR
KEGG_PATHWAY	hsa05130:Pathogenic Escherichia coli infection	27	1.41956	9.75878e-08	P07437,Q59FI5,Q71U36,Q96H99,Q9H6Z0,Q1KLZ0,Q9UE89,Q8WVW5,Q96DE1,Q562S0,Q9H7Z5,Q6LC01,Q9UQM3,Q562R8,Q3ZCR3,Q9BQE3,Q9UJU1,Q8IZ29,P59998,Q562Z7,Q562Z6,Q562Z4,Q53G92,Q2F831,P05556,Q13464,Q53G99,Q53R19,Q53GA7,A8K7C2,Q9UJM1,Q8IWP6,P14317,P60953,P17252,Q2TSD3,Q8TDA3,P27348,A4D275,Q53Y93,Q53GK6,Q562P0,Q5SU16,Q59GZ4,P63104,Q562X9,Q13509,O15144,O15145,Q6LD62,Q8WUG4,O15143,Q9BV28,Q96FU6,Q53RR5,Q6UR97,Q6UR98,…	808	57	5085	2.98104	1.66874e-05	2.38393e-06	0.000119173
INTERPRO	IPR002452:Alpha tubulin	6	0.315457	0.0012791	Q4QQJ5,Q71U36,Q9H6Z0,Q8N532,Q53GA7,Q6PEY2,A6NHL2,Q1ZYQ1,Q13748,Q9UQM3,P68366,Q9BQE3,A8K0B8,A6NJQ0	1804	9	16659	6.15632	0.948005	0.0438086	2.21276
INTERPRO	IPR018316:Tubulin/FtsZ, 2-layer sandwich domain	9	0.473186	0.00146842	P07437,Q71U36,Q9H6Z0,Q86YW1,Q6PEY2,P68371,Q8N6N5,A6NHL2,Q96HX0,Q6LC01,Q9UQM3,P68366,Q5SU16,Q3ZCR3,Q9BQE3,Q8IZ29,Q1JUM4,Q53G92,Q13509,Q1JUM2,Q4QQJ5,Q1JUM3,Q9BV28,Q8N532,Q53GA7,Q1ZYQ1,Q8IWP6,Q6UR92,Q13748,Q6UR97,Q6UR98,Q1JUL9,Q6UR95,Q6UR96,Q6UR93,Q6UR94,Q7KZS6,A8K0B8,A6NJQ0,Q1JUL8,Q1JUM0,Q1JUL6,A2BFA2	1804	22	16659	3.77774	0.966444	0.0480056	2.53632
INTERPRO	IPR017975:Tubulin, conserved site	9	0.473186	0.00204013	P07437,Q71U36,Q9H6Z0,Q86YW1,Q6PEY2,P68371,Q8N6N5,A6NHL2,Q96HX0,Q6LC01,Q9UQM3,P68366,Q5SU16,Q3ZCR3,Q9BQE3,Q8IZ29,Q1JUM4,Q53G92,Q13509,Q1JUM2,Q4QQJ5,Q1JUM3,Q9BV28,Q8N532,Q53GA7,Q1ZYQ1,Q8IWP6,Q6UR92,Q13748,Q6UR97,Q6UR98,Q1JUL9,Q6UR95,Q6UR96,Q6UR93,Q6UR94,Q7KZS6,A8K0B8,A6NJQ0,Q1JUL8,Q1JUM0,Q1JUL6,A2BFA2	1804	23	16659	3.61349	0.991063	0.0625797	3.50731
INTERPRO	IPR000217:Tubulin	9	0.473186	0.0027733	P07437,Q71U36,Q9H6Z0,Q86YW1,Q6PEY2,P68371,Q8N6N5,A6NHL2,Q96HX0,Q6LC01,Q9UQM3,P68366,Q5SU16,Q3ZCR3,Q9BQE3,Q8IZ29,Q1JUM4,Q53G92,Q13509,Q1JUM2,Q4QQJ5,Q1JUM3,Q9BV28,Q8N532,Q53GA7,Q1ZYQ1,Q8IWP6,Q6UR92,Q13748,Q6UR97,Q6UR98,Q1JUL9,Q6UR95,Q6UR96,Q6UR93,Q6UR94,Q7KZS6,A8K0B8,A6NJQ0,Q1JUL8,Q1JUM0,Q1JUL6,A2BFA2	1804	24	16659	3.46293	0.998364	0.078955	4.73916
INTERPRO	IPR003008:Tubulin/FtsZ, GTPase domain	9	0.473186	0.0027733	P07437,Q71U36,Q9H6Z0,Q86YW1,Q6PEY2,P68371,Q8N6N5,A6NHL2,Q96HX0,Q6LC01,Q9UQM3,P68366,Q5SU16,Q3ZCR3,Q9BQE3,Q8IZ29,Q1JUM4,Q53G92,Q13509,Q1JUM2,Q4QQJ5,Q1JUM3,Q9BV28,Q8N532,Q53GA7,Q1ZYQ1,Q8IWP6,Q6UR92,Q13748,Q6UR97,Q6UR98,Q1JUL9,Q6UR95,Q6UR96,Q6UR93,Q6UR94,Q7KZS6,A8K0B8,A6NJQ0,Q1JUL8,Q1JUM0,Q1JUL6,A2BFA2	1804	24	16659	3.46293	0.998364	0.078955	4.73916
PIR_SUPERFAMILY	PIRSF002306:tubulin	9	0.473186	0.00513693	P07437,Q71U36,Q9H6Z0,Q86YW1,Q6PEY2,P68371,Q8N6N5,A6NHL2,Q96HX0,Q6LC01,Q9UQM3,P68366,Q5SU16,Q3ZCR3,Q9BQE3,Q8IZ29,Q1JUM4,Q53G92,Q13509,Q1JUM2,Q4QQJ5,Q1JUM3,Q9BV28,Q8N532,Q53GA7,Q1ZYQ1,Q8IWP6,Q6UR92,Q13748,Q6UR97,Q6UR98,Q1JUL9,Q6UR95,Q6UR96,Q6UR93,Q6UR94,Q7KZS6,A8K0B8,A6NJQ0,Q1JUL8,Q1JUM0,Q1JUL6,A2BFA2	976	22	7396	3.10004	0.989243	0.364419	7.69251
GOTERM_BP_FAT	GO:0007018~microtubule-based movement	24	1.26183	0.00667529	P07437,Q9UPN3,P09936,Q92862,Q71U36,Q9H6Z0,Q8IXI2,P43034,Q6LC01,Q9UQM3,Q96PK2,Q6PEK6,Q3ZCR3,Q9BQE3,Q8IZ29,Q9UFW7,Q53G92,Q2TA90,Q59GB8,Q2YDC5,O60282,Q53GA7,Q8IWP6,P42704,Q6PKB2,O60313,A6NFV0,Q7RTP8,Q7RTQ4,Q7RTQ3,Q7RTQ2,Q7RTQ1,Q7RTQ8,Q7RTQ7,Q7RTQ0,Q2VIQ3,Q5SU16,Q7RTQ9,Q59GZ5,Q59HG1,Q13509,O95239,Q9BV28,Q66K46,Q53QN7,Q6UR97,Q6UR98,Q1JUL9,Q1JUL8,A6NJQ0,Q1JUL6,Q17RV9,Q4W5K6,Q86YW1,Q6PEY2,P68371,A6NHL2,…	1611	113	13528	1.78349	1	0.0866404	11.6174
UP_SEQ_FEATURE	site:Involved in polymerization	4	0.210305	0.00821975	Q1ZYQ1,Q13748,Q9UQM3,Q71U36,Q9BQE3,A8K0B8,Q8N532,A6NJQ0,Q53GA7,Q6PEY2	1886	5	19113	8.10732	1	0.305961	14.3052
GOTERM_BP_FAT	GO:0051258~protein polymerization	13	0.683491	0.0106715	P07437,O60610,Q71U36,Q69YR8,Q9H6Z0,Q5T0I0,Q5T0I1,Q5T0I2,A2A418,Q86YW1,Q6PEY2,Q03135,P68371,Q9H7Z5,A6NHL2,Q96HX0,Q6LC01,Q9UQM3,P68366,Q3ZCR3,Q9BQE3,Q8IZ29,P59998,Q6UUU0,Q59FH8,Q1JUM4,Q53G92,Q1JUM2,Q1JUM3,Q4QQJ5,Q8N532,Q53GA7,Q17RN4,Q8IWP6,Q6UR92,Q6UR95,Q6UR96,Q6UR93,Q6UR94,A8K0B8,Q1JUM0,Q96IL1,Q8N6N5,Q6URC4,Q5SU16,Q7KZJ7,Q2TNI1,Q13509,Q9BV28,Q6AWA3,Q4KMS8,Q1ZYQ1,Q6UR97,Q13748,Q6UR98,Q1JUL9,P06396,…	1611	49	13528	2.22785	1	0.126974	17.9486
KEGG_PATHWAY	hsa04540:Gap junction	17	0.893796	0.333886	P07437,Q59FI5,Q14571,Q71U36,Q9H6Z0,Q96G51,Q86YW1,Q6PEY2,P68371,A6NHL2,Q5H9N4,Q96HX0,Q6ICN0,Q6LC01,Q9UQM3,P62993,P68366,Q3ZCR3,Q9BQE3,Q8IZ29,P17612,P22694,Q53G92,Q1JUM4,Q1JUM2,Q1JUM3,Q4QQJ5,A8K7C4,Q8N532,Q53GA7,Q6UR92,Q8IWP6,Q6UR95,Q6UR96,Q6UR93,Q6UR94,A8K0B8,Q14VH1,Q1JUM0,Q6QLU7,Q2TSD3,P17252,Q6NT27,Q13164,P06493,Q8N6N5,Q5SU16,Q32P54,Q13509,Q9BV28,P50148,Q15136,Q1ZYQ1,Q6UR97,Q13748,Q1JUL9,Q6UR98,…	808	89	5085	1.20209	1	0.698162	99.2998
INTERPRO	IPR002453:Beta tubulin	3	0.157729	0.337683	P07437,Q86YW1,P68371,Q8N6N5,Q96HX0,Q6LC01,Q5SU16,Q3ZCR3,Q8IZ29,Q1JUM4,Q53G92,Q13509,Q1JUM2,Q1JUM3,Q9BV28,Q6UR92,Q8IWP6,Q6UR97,Q6UR98,Q1JUL9,Q6UR95,Q6UR96,Q6UR93,Q6UR94,Q7KZS6,Q1JUL8,Q1JUM0,Q1JUL6,A2BFA2	1804	11	16659	2.51849	1	0.995237	99.9256
INTERPRO	IPR013838:Beta tubulin, autoregulation binding site	3	0.157729	0.594994	P07437,Q86YW1,P68371,Q8N6N5,Q96HX0,Q6LC01,Q5SU16,Q3ZCR3,Q8IZ29,Q1JUM4,Q53G92,Q13509,Q1JUM2,Q1JUM3,Q9BV28,Q6UR92,Q8IWP6,Q6UR97,Q6UR98,Q1JUL9,Q6UR95,Q6UR96,Q6UR93,Q6UR94,Q7KZS6,Q1JUL8,Q1JUM0,Q1JUL6,A2BFA2	1804	18	16659	1.53908	1	0.999962	100
Annotation Cluster 94	Enrichment Score: 2.3008659273685597
Category	Term	Count	%	PValue	Genes	List Total	Pop Hits	Pop Total	Fold Enrichment	Bonferroni	Benjamini	FDR
SMART	SM00298:CHROMO	11	0.578339	0.000789629	A8K4Z1,Q59EJ8,Q12873,Q13185,Q8NAR9,Q9H7Z6,Q461N2,Q96MK4,Q17RS0,Q05CG0,P29374,Q92922,A4D177,Q3L8U1,Q05CG6,Q5JPE5,Q561W3,Q5JTQ0,Q05BW5,Q8TAQ2,A8MYU0,Q2TAZ1,Q14839,Q92993,Q99549,Q05CR1,O00257,Q58EY4	909	32	9079	3.43334	0.204737	0.0108494	1.04465
INTERPRO	IPR000953:Chromo domain	11	0.578339	0.00147678	A8K4Z1,Q59EJ8,Q12873,Q13185,Q8NAR9,Q9H7Z6,Q461N2,Q96MK4,Q17RS0,Q05CG0,P29374,Q92922,A4D177,Q3L8U1,Q05CG6,Q5JPE5,Q561W3,Q5JTQ0,Q05BW5,Q8TAQ2,A8MYU0,Q2TAZ1,Q14839,Q92993,Q99549,Q05CR1,O00257,Q58EY4	1804	32	16659	3.17435	0.967087	0.0475998	2.5506
UP_SEQ_FEATURE	domain:Chromo 1	4	0.210305	0.107315	Q461N2,Q12873,Q2TAZ1,Q14839,Q13185,A4D177,Q3L8U1,Q8NAR9,Q05CG6	1886	12	19113	3.37805	1	0.96569	88.0366
Annotation Cluster 95	Enrichment Score: 2.298701954250971
Category	Term	Count	%	PValue	Genes	List Total	Pop Hits	Pop Total	Fold Enrichment	Bonferroni	Benjamini	FDR
KEGG_PATHWAY	hsa03030:DNA replication	15	0.788644	0.000708735	Q75MV9,A8K0Y9,Q53FG5,Q05DR2,Q53T61,P35249,Q6FHX6,Q8N451,Q14756,Q9BWF4,P35250,P35251,P28340,Q4ZG57,Q5U0C2,A8K6E7,Q53HK8,P49736,Q308M6,Q8NHX6,P12004,Q59F49,Q14566,P27694,Q567R6,Q7Z6P5,P39748,P25205,Q53HJ4,Q6FI35,P33992,Q5W0E8,P33991,Q04837,A4D1U3,Q6FHF5,P40938,Q7Z6A3,Q7Z6A1,Q7Z6A2,Q75MT5,Q5TBB1	808	36	5085	2.62222	0.114176	0.00754866	0.862071
UP_SEQ_FEATURE	domain:MCM	5	0.262881	0.00476527	Q7Z6P5,Q53FG5,Q53T61,P25205,Q53HJ4,P33992,Q9BWF4,P33991,Q4ZG57,P49736,Q8NHX6,Q59F49,Q14566	1886	8	19113	6.33384	1	0.203869	8.54679
INTERPRO	IPR018525:DNA-dependent ATPase MCM, conserved site	5	0.262881	0.00668602	Q7Z6P5,Q53FG5,Q53T61,P25205,Q53HJ4,P33992,Q9BWF4,P33991,Q4ZG57,P49736,Q8NHX6,Q59F49,Q14566	1804	8	16659	5.77155	1	0.161464	11.0664
GOTERM_BP_FAT	GO:0006270~DNA replication initiation	7	0.368034	0.00782006	Q2NLC9,Q00577,Q7Z6P5,Q5U0P9,Q53FG5,Q53T61,P25205,Q53HJ4,P33992,P33991,Q9BWF4,Q96F82,Q4ZG57,Q56A79,Q13415,P49736,Q8NHX6,Q2NLD4,Q59F49,Q14566	1611	16	13528	3.67381	1	0.0984065	13.4768
SMART	SM00350:MCM	5	0.262881	0.00829832	Q7Z6P5,Q53FG5,Q53T61,P25205,Q53HJ4,P33992,Q9BWF4,P33991,Q4ZG57,P49736,Q8NHX6,Q59F49,Q14566	909	9	9079	5.54883	0.910771	0.079952	10.4862
INTERPRO	IPR001208:DNA-dependent ATPase MCM	5	0.262881	0.0110116	Q7Z6P5,Q53FG5,Q53T61,P25205,Q53HJ4,P33992,Q9BWF4,P33991,Q4ZG57,P49736,Q8NHX6,Q59F49,Q14566	1804	9	16659	5.13027	1	0.23604	17.5993
Annotation Cluster 96	Enrichment Score: 2.294373355100777
Category	Term	Count	%	PValue	Genes	List Total	Pop Hits	Pop Total	Fold Enrichment	Bonferroni	Benjamini	FDR
GOTERM_BP_FAT	GO:0010941~regulation of cell death	130	6.83491	0.000337303	P07437,A4QPB4,Q5VVD0,Q53R94,Q32Q12,A1L4K2,Q13564,Q0EF63,Q59F45,Q0EF62,Q6VBB7,Q6J333,A2RU75,Q14BD3,Q92934,Q14BD4,Q9BZZ5,Q13464,Q5VVC8,Q5VVC9,A6NJ44,Q59GP5,Q53SY1,P67775,Q6NR85,Q2YDB7,Q49A90,Q1L6K4,A2A3R6,Q5U0M2,P52565,Q1L6K6,Q9UC85,Q9UPH5,Q0ZAI9,P51398,P01106,Q59EQ2,P00813,P63104,Q8WUG4,P14921,P52756,Q6IT96,Q59EP7,Q59H39,Q6IPN0,Q6I9T8,Q2XN98,Q2TAM5,P31947,Q2LAE2,P31946,A1XKG3,A8K6C0,Q5H9N4,Q5GRH6,…	1611	815	13528	1.33944	0.715014	0.00672629	0.620112
GOTERM_BP_FAT	GO:0042981~regulation of apoptosis	128	6.72976	0.000415021	P07437,A4QPB4,Q5VVD0,Q53R94,Q32Q12,A1L4K2,Q13564,Q0EF63,Q59F45,Q0EF62,Q6VBB7,Q6J333,A2RU75,Q14BD3,Q92934,Q14BD4,Q9BZZ5,Q13464,Q5VVC8,Q5VVC9,A6NJ44,Q59GP5,Q53SY1,P67775,Q6NR85,Q2YDB7,Q49A90,Q1L6K4,A2A3R6,Q5U0M2,P52565,Q1L6K6,Q9UC85,Q9UPH5,Q0ZAI9,P51398,P01106,Q59EQ2,P00813,P63104,Q8WUG4,P14921,P52756,Q6IT96,Q59H39,Q6IPN0,Q6I9T8,Q2XN98,Q2TAM5,P31947,Q2LAE2,P31946,A1XKG3,A8K6C0,Q5H9N4,Q5GRH6,O95831,…	1611	804	13528	1.33688	0.786606	0.00805438	0.762476
GOTERM_BP_FAT	GO:0043067~regulation of programmed cell death	129	6.78233	0.000426858	P07437,A4QPB4,Q5VVD0,Q53R94,Q32Q12,A1L4K2,Q13564,Q0EF63,Q59F45,Q0EF62,Q6VBB7,Q6J333,A2RU75,Q14BD3,Q92934,Q14BD4,Q9BZZ5,Q13464,Q5VVC8,Q5VVC9,A6NJ44,Q59GP5,Q53SY1,P67775,Q6NR85,Q2YDB7,Q49A90,Q1L6K4,A2A3R6,Q5U0M2,P52565,Q1L6K6,Q9UC85,Q9UPH5,Q0ZAI9,P51398,P01106,Q59EQ2,P00813,P63104,Q8WUG4,P14921,P52756,Q6IT96,Q59H39,Q6IPN0,Q6I9T8,Q2XN98,Q2TAM5,P31947,Q2LAE2,P31946,A1XKG3,A8K6C0,Q5H9N4,Q5GRH6,O95831,…	1611	812	13528	1.33405	0.795804	0.00824022	0.784141
GOTERM_BP_FAT	GO:0060548~negative regulation of cell death	64	3.36488	0.00100829	A8K6I5,P16989,Q308M2,P23528,Q1KLZ6,Q32Q12,A1L4K2,Q7Z453,Q59F45,Q2XSC7,Q6VBB7,Q6J333,Q9H3Z4,Q2F831,P49588,Q14BD3,Q14BD4,Q9BZZ5,Q13464,Q2F839,A6NJ44,Q59EB5,Q6LEN1,Q59GP5,A8MTE3,Q04206,Q6NR85,Q49A90,Q16594,Q96AM7,Q19RW5,Q6FGK3,P52565,P04040,Q9UC85,Q0ZAI9,Q96GD7,Q0Z7V0,P62979,P11021,P01106,P00813,P63104,Q9NX34,Q8WW55,Q6IT96,P62987,P62988,Q59EP7,Q59H39,Q5TZZ9,Q2TAM5,Q15811,Q2XN98,P05783,Q6GMY7,Q2LAE2,…	1611	360	13528	1.49285	0.97657	0.0177161	1.84289
GOTERM_BP_FAT	GO:0043069~negative regulation of programmed cell death	63	3.3123	0.00153475	A8K6I5,P16989,Q308M2,P23528,Q1KLZ6,Q32Q12,A1L4K2,Q7Z453,Q59F45,Q2XSC7,Q6VBB7,Q6J333,Q9H3Z4,Q2F831,P49588,Q14BD3,Q14BD4,Q9BZZ5,Q13464,Q2F839,A6NJ44,Q59EB5,Q6LEN1,Q59GP5,A8MTE3,Q04206,Q6NR85,Q49A90,Q16594,Q96AM7,Q19RW5,Q6FGK3,P52565,P04040,Q9UC85,Q0ZAI9,Q96GD7,Q0Z7V0,P62979,P11021,P01106,P00813,P63104,Q9NX34,Q8WW55,Q6IT96,P62987,P62988,Q59H39,Q5TZZ9,Q2TAM5,Q15811,Q2XN98,P05783,Q6GMY7,Q2LAE2,Q5T3N0,…	1611	359	13528	1.47362	0.996704	0.0253031	2.79231
GOTERM_BP_FAT	GO:0043066~negative regulation of apoptosis	62	3.25973	0.001761	A8K6I5,P16989,Q308M2,P23528,Q1KLZ6,Q32Q12,A1L4K2,Q7Z453,Q59F45,Q2XSC7,Q6VBB7,Q6J333,Q9H3Z4,Q2F831,P49588,Q14BD3,Q14BD4,Q9BZZ5,Q13464,Q2F839,A6NJ44,Q59EB5,Q6LEN1,Q59GP5,A8MTE3,Q04206,Q6NR85,Q49A90,Q16594,Q96AM7,Q19RW5,Q6FGK3,P52565,P04040,Q9UC85,Q0ZAI9,Q96GD7,Q0Z7V0,P62979,P11021,P01106,P00813,P63104,Q9NX34,Q8WW55,Q6IT96,P62987,P62988,Q59H39,Q5TZZ9,Q2TAM5,Q15811,Q2XN98,P05783,Q6GMY7,Q2LAE2,Q5T3N0,…	1611	354	13528	1.47071	0.998582	0.0286027	3.19765
GOTERM_BP_FAT	GO:0043065~positive regulation of apoptosis	66	3.47003	0.0242721	A4QPB4,P07437,Q5VVD0,Q308M2,P62753,Q3SWU9,Q4VJB6,Q6LC01,A1L4K2,Q7Z453,Q53XZ5,Q59F45,Q0EF63,Q2XSC7,Q0EF62,Q5T2B5,Q6J333,P23396,Q5T2B7,A2RU75,Q92934,Q14BD3,Q14BD4,Q5VVC8,Q5VVC9,P62258,P67775,Q6NR85,Q49A90,Q1L6K4,Q96KE7,P06239,A2A3R6,Q5U0M2,Q2TSD2,Q19RW5,Q1L6K6,Q2TSD3,P17252,Q9UPH5,P62979,P51398,Q5SU16,P01106,Q59EQ2,Q8NDD7,Q8WUG4,P14921,Q9BZF9,P52756,P62987,Q6ZTU8,P62988,Q68CT7,Q573B4,Q6I9T8,A8K4L9,…	1611	430	13528	1.28888	1	0.238852	36.4322
GOTERM_BP_FAT	GO:0043068~positive regulation of programmed cell death	66	3.47003	0.0277793	A4QPB4,P07437,Q5VVD0,Q308M2,P62753,Q3SWU9,Q4VJB6,Q6LC01,A1L4K2,Q7Z453,Q53XZ5,Q59F45,Q0EF63,Q2XSC7,Q0EF62,Q5T2B5,Q6J333,P23396,Q5T2B7,A2RU75,Q92934,Q14BD3,Q14BD4,Q5VVC8,Q5VVC9,P62258,P67775,Q6NR85,Q49A90,Q1L6K4,Q96KE7,P06239,A2A3R6,Q5U0M2,Q2TSD2,Q19RW5,Q1L6K6,Q2TSD3,P17252,Q9UPH5,P62979,P51398,Q5SU16,P01106,Q59EQ2,Q8NDD7,Q8WUG4,P14921,Q9BZF9,P52756,P62987,Q6ZTU8,P62988,Q68CT7,Q573B4,Q6I9T8,A8K4L9,…	1611	433	13528	1.27995	1	0.262031	40.5158
GOTERM_BP_FAT	GO:0006916~anti-apoptosis	35	1.84017	0.0297112	A8K6I5,Q59EJ3,Q6MZI0,P09601,P23528,Q5W0H4,Q1KLZ6,Q2KHP4,P08758,Q3MIH3,P15056,Q05639,Q2F831,P04083,Q59GY7,Q9BZZ5,Q6LE88,A8K7C4,Q2F839,A4D1T4,Q5PY61,Q9UCC0,Q6LEN1,Q59GP5,P09211,A8MTE3,Q04206,Q6NR85,Q49A90,Q96AM7,Q7Z7M7,Q7Z7M6,Q7Z7M5,Q7Z7M4,P52565,Q66K58,Q9UFQ0,Q8TBK7,P62979,Q86YH5,Q9UC35,P11021,P01106,P63104,Q8WYN9,Q5SY02,Q9NX34,Q8WYN8,Q5SY00,Q6LD62,Q6ZRV7,Q5U5U6,Q8WW55,P62987,Q6IT96,P62988,A6NHJ0,…	1611	206	13528	1.42672	1	0.274997	42.6579
GOTERM_BP_FAT	GO:0010942~positive regulation of cell death	66	3.47003	0.0302794	A4QPB4,P07437,Q5VVD0,Q308M2,P62753,Q3SWU9,Q4VJB6,Q6LC01,A1L4K2,Q7Z453,Q53XZ5,Q59F45,Q0EF63,Q2XSC7,Q0EF62,Q5T2B5,Q6J333,P23396,Q5T2B7,A2RU75,Q92934,Q14BD3,Q14BD4,Q5VVC8,Q5VVC9,P62258,P67775,Q6NR85,Q49A90,Q1L6K4,Q96KE7,P06239,A2A3R6,Q5U0M2,Q2TSD2,Q19RW5,Q1L6K6,Q2TSD3,P17252,Q9UPH5,P62979,P51398,Q5SU16,P01106,Q59EQ2,Q8NDD7,Q8WUG4,P14921,Q9BZF9,P52756,P62987,Q6ZTU8,P62988,Q68CT7,Q573B4,Q6I9T8,A8K4L9,…	1611	435	13528	1.27407	1	0.278835	43.2739
GOTERM_BP_FAT	GO:0006917~induction of apoptosis	49	2.57624	0.0533128	Q01085,P07437,A4QPB4,Q59FI5,Q5VVD0,P52701,Q1ED40,A8K7B7,Q308M2,Q96NH6,P09601,P84022,Q3SWU9,Q4VJB6,Q6LC01,Q7Z453,A1L4K2,Q53XZ5,P61247,Q8IZ29,Q59F45,Q2XSC7,Q5T2B5,P23396,Q6J333,Q3MIH3,A8K725,Q5T2B7,Q5RZ99,Q96S99,A2RU75,Q92934,Q14BD3,Q14BD4,Q5VVC8,Q2NL95,Q5VVC9,Q5PY61,Q53GA5,Q8IWP6,P62258,Q6PD56,P67775,A8K5M2,Q9UET4,Q6NXR8,Q49AS9,Q6FH21,Q49A90,P63241,P45983,Q1L6K4,Q96KE7,P06239,Q5U0M2,Q2TSD2,Q19RW5,…	1611	320	13528	1.28583	1	0.416022	63.5848
GOTERM_BP_FAT	GO:0012502~induction of programmed cell death	49	2.57624	0.055723	Q01085,P07437,A4QPB4,Q59FI5,Q5VVD0,P52701,Q1ED40,A8K7B7,Q308M2,Q96NH6,P09601,P84022,Q3SWU9,Q4VJB6,Q6LC01,Q7Z453,A1L4K2,Q53XZ5,P61247,Q8IZ29,Q59F45,Q2XSC7,Q5T2B5,P23396,Q6J333,Q3MIH3,A8K725,Q5T2B7,Q5RZ99,Q96S99,A2RU75,Q92934,Q14BD3,Q14BD4,Q5VVC8,Q2NL95,Q5VVC9,Q5PY61,Q53GA5,Q8IWP6,P62258,Q6PD56,P67775,A8K5M2,Q9UET4,Q6NXR8,Q49AS9,Q6FH21,Q49A90,P63241,P45983,Q1L6K4,Q96KE7,P06239,Q5U0M2,Q2TSD2,Q19RW5,…	1611	321	13528	1.28183	1	0.427098	65.2568
Annotation Cluster 97	Enrichment Score: 2.28860894945284
Category	Term	Count	%	PValue	Genes	List Total	Pop Hits	Pop Total	Fold Enrichment	Bonferroni	Benjamini	FDR
GOTERM_MF_FAT	GO:0035257~nuclear hormone receptor binding	22	1.15668	0.000285204	Q86WG4,Q59EJ8,Q4VXL8,Q59EE8,Q9P0K0,Q6LE77,O15212,Q9Y6Q9,Q9H4N8,Q6P0P7,Q05D20,A8K3Z8,Q14CD2,Q4VXL4,P62826,A0T124,Q4VXL5,O95359,Q4VXL2,Q6LE81,P06400,Q569F6,Q6LE80,Q7Z7J0,Q7KZ60,Q561W3,O94906,Q0IIN7,Q6LE82,Q3B874,Q6LE79,Q7KZ61,Q569J4,Q59HH0,Q6DUF0,Q02790,Q5STK9,P27797,Q15596,Q7Z5Q6,A8K5E3,Q9Y2W1,Q5HYD3,Q9Y4C1,Q9BXV3,P51692,Q5STK2,Q6IPL9,Q0VF45,A4LAZ5,Q99623,Q53F85,Q96T76,Q6IAT4,Q15652,Q6PJV4,Q6LE65,…	1596	77	12983	2.3242	0.302508	0.0063005	0.463007
GOTERM_MF_FAT	GO:0051427~hormone receptor binding	24	1.26183	0.000296394	Q86WG4,Q59EJ8,Q4VXL8,Q59EE8,Q9P0K0,Q6LE77,O15212,Q9Y6Q9,Q9H4N8,A8K763,Q6P0P7,Q05D20,A8K3Z8,Q14CD2,Q4VXL4,Q4VXL5,P62826,A0T124,O95359,Q4VXL2,Q6LE81,P06400,Q569F6,Q6LE80,Q7Z7J0,Q7KZ60,Q561W3,O94906,Q0IIN7,Q6LE82,Q3B874,Q6LE79,Q7KZ61,Q569J4,Q59HH0,Q6DUF0,Q02790,Q5STK9,P27797,Q15596,Q7Z5Q6,A8K5E3,P62195,Q9Y2W1,Q5HYD3,Q9Y4C1,Q9BXV3,P51692,Q06124,Q16344,Q5STK2,Q6IPL9,Q0VF45,A4LAZ5,Q99623,Q53F85,Q96T76,…	1596	88	12983	2.21856	0.312299	0.0063257	0.481132
GOTERM_MF_FAT	GO:0035258~steroid hormone receptor binding	14	0.736067	0.000382748	Q86WG4,Q6DUF0,Q59EJ8,Q59EE8,Q02790,Q9P0K0,Q5STK9,P27797,Q7Z5Q6,Q6LE77,A8K5E3,Q9Y6Q9,Q9H4N8,Q9Y4C1,Q9BXV3,P51692,A8K3Z8,P62826,A4LAZ5,Q0VF45,Q99623,Q53F85,Q6LE81,P06400,Q96T76,Q569F6,Q6LE80,Q6IAT4,Q7Z7J0,Q7KZ60,Q561W3,O94906,Q6LE65,Q0IIN7,Q92993,Q8WW55,P78495,O43815,Q53G71,Q6LE82,Q3B874,Q6LE79,Q04917,Q9UER7,Q7KZ61,Q59HH0,Q59H39	1596	38	12983	2.997	0.38338	0.008026	0.620899
GOTERM_BP_FAT	GO:0030521~androgen receptor signaling pathway	10	0.525762	0.0223019	Q86WG4,Q6DUF0,P31689,Q59EJ8,Q59EE8,Q9P0K0,Q5STK9,Q7Z5Q6,Q6LE77,Q5T7Q0,Q96SY8,A8K5E3,Q9Y2W1,Q9Y6Q9,Q6P0P7,Q05D20,Q9Y4C1,A8K3Z8,P62826,Q0VF45,A4LAZ5,Q8NC65,Q53F85,Q6LE81,P06400,Q569F6,Q6LE80,Q7Z7J0,Q7KZ60,Q561W3,Q6PJV4,Q6LE65,Q0IIN7,Q92993,P78495,Q6LE82,Q86TL9,Q96SM7,Q6LE79,Q4LE49,Q7Z5U1,Q9UER7,Q7KZ61,O14497,Q15648,Q59HH0,Q96T01	1611	36	13528	2.33257	1	0.224554	34.0233
GOTERM_MF_FAT	GO:0050681~androgen receptor binding	8	0.42061	0.0333154	Q6DUF0,Q86WG4,Q59EJ8,Q59EE8,Q5STK9,Q9P0K0,P27797,Q7Z5Q6,Q6LE77,A8K5E3,Q9Y6Q9,Q9Y4C1,A8K3Z8,P62826,A4LAZ5,Q0VF45,Q53F85,Q569F6,P06400,Q6LE81,Q6IAT4,Q6LE80,Q7Z7J0,Q7KZ60,Q561W3,O94906,Q6LE65,Q0IIN7,Q92993,P78495,Q53G71,Q6LE82,Q6LE79,Q9UER7,Q7KZ61,Q59HH0	1596	26	12983	2.50299	1	0.332169	42.3779
GOTERM_BP_FAT	GO:0030518~steroid hormone receptor signaling pathway	13	0.683491	0.0380478	Q86WG4,Q59EJ8,P31689,Q59EE8,Q9P0K0,Q6LE77,Q96SY8,Q5T7Q0,Q9Y6Q9,Q9H4N8,Q6P0P7,Q05D20,A8K3Z8,Q14CD2,P62826,Q8NC65,Q569F6,P06400,Q6LE81,Q6LE80,Q561W3,Q7KZ60,Q7Z7J0,Q0IIN7,Q6LE82,Q86TL9,Q6LE79,Q4LE49,Q7KZ61,O14497,Q569J4,Q59HH0,Q96T01,Q6DUF0,Q5STK9,P27797,Q15596,Q7Z5Q6,A8K5E3,Q9Y2W1,Q9Y4C1,Q0VF45,A4LAZ5,Q53F85,Q6IAT4,Q6PJV4,Q6LE65,Q92993,P78495,Q53G71,Q96SM7,Q7Z5U1,Q04917,Q9UER7,Q15648	1611	58	13528	1.88215	1	0.328826	51.0925
GOTERM_BP_FAT	GO:0030522~intracellular receptor-mediated signaling pathway	14	0.736067	0.104348	Q86WG4,Q59EJ8,P31689,Q59EE8,Q9P0K0,Q6LE77,Q96SY8,Q5T7Q0,Q9Y6Q9,Q9H4N8,Q6P0P7,Q05D20,A8K3Z8,Q14CD2,P62826,Q8NC65,Q569F6,P06400,Q6LE81,Q6LE80,Q561W3,Q7KZ60,Q7Z7J0,Q0IIN7,Q6LE82,Q86TL9,Q6LE79,Q4LE49,Q7KZ61,O14497,Q569J4,Q59HH0,Q96T01,Q6DUF0,Q53TD0,Q5STK9,P27797,Q15596,Q7Z5Q6,A8K5E3,Q9Y2W1,Q9Y4C1,P23497,Q0VF45,A4LAZ5,Q53F85,Q6IAT4,Q6PJV4,Q6LE65,Q92993,P78495,Q53G71,Q96SM7,Q7Z5U1,Q04917,Q9UER7,Q15648	1611	75	13528	1.56749	1	0.617237	86.8924
Annotation Cluster 98	Enrichment Score: 2.2772901457858654
Category	Term	Count	%	PValue	Genes	List Total	Pop Hits	Pop Total	Fold Enrichment	Bonferroni	Benjamini	FDR
SP_PIR_KEYWORDS	Flavoprotein	24	1.26183	0.000252533	P49748,A4QPB4,Q0QF12,A8K4V0,Q9NNW7,P26440,P45954,Q9H845,O95831,Q17RE6,Q6VBP2,Q9NP11,Q6VBP4,Q6VBP3,Q6VBP5,Q53XZ9,Q53HR2,P15559,Q53GE3,Q6VBP9,P08559,Q9UES8,P29803,Q5RZ99,Q6YNQ1,Q5JPU1,Q9H9P8,Q9Y6N5,Q5JPU2,Q8WUQ0,Q6TGM4,Q5JPU0,Q53S12,Q03504,Q99724,Q5JPU3,Q99725,Q53HW7,O00116,P11177,Q53H41,Q6VBQ0,Q16881,Q7Z3W5,Q6FI31,Q15067,Q5HYG7,Q1L6K4,Q6LCA3,Q5RZA0,Q1L6K6,Q9UHS8,A8MWG9,Q5JPT8,Q5JPT9,Q6ZR44,P09622,…	1895	107	19235	2.27672	0.147964	0.00183884	0.375127
INTERPRO	IPR013027:FAD-dependent pyridine nucleotide-disulphide oxidoreductase	9	0.473186	0.000467033	Q1L6K4,A4QPB4,Q0QF12,Q5RZA0,Q1L6K6,Q9NNW7,Q9UHS8,A8MWG9,Q6ZR44,P09622,Q17RE6,O95831,Q8IW48,P31040,Q6VBP2,Q99475,Q6VBP4,Q6VBP3,A8K5J6,Q6VBP5,A8K5A2,Q6VBP9,Q9UES8,Q5RZ99,Q6M1B7,Q12882,Q6YNQ1,Q9Y6N5,P00390,Q59GW8,Q03504,Q53HW7,A2RRQ3,Q6VBQ0,A2RRQ2,Q59ET7,Q16881,Q6FI31,Q6VB42,Q6VB41,Q6VB40	1804	19	16659	4.37423	0.660098	0.0205381	0.813353
UP_SEQ_FEATURE	nucleotide phosphate-binding region:FAD	15	0.788644	0.00206597	P49748,A4QPB4,Q0QF12,A8K4V0,Q9NNW7,P26440,O95831,Q17RE6,P45954,Q6VBP2,Q6VBP4,Q6VBP3,Q6VBP5,Q53XZ9,P15559,Q6VBP9,Q53HR2,Q9UES8,Q5RZ99,Q6YNQ1,Q8WUQ0,Q6TGM4,Q03504,Q6VBQ0,Q16881,Q6FI31,Q5HYG7,Q1L6K4,Q5RZA0,Q1L6K6,A8MWG9,Q6ZR44,P09622,Q53G81,Q8IW48,P31040,Q3B792,P11310,Q99475,A8K5J6,Q53RD0,A8K5A2,Q6M1B7,Q6TGM5,Q12882,P00390,Q59GW8,P43304,Q5T4U4,Q6ZVI6,Q53T76,Q5T4U5,A2RRQ3,A2RRQ2,Q59ET7,Q5SQN6,Q6VB42,…	1886	61	19113	2.492	0.999847	0.116388	3.79433
SP_PIR_KEYWORDS	FAD	21	1.1041	0.00760907	P49748,A4QPB4,Q0QF12,A8K4V0,Q9NNW7,P26440,P45954,Q9H845,O95831,Q17RE6,Q6VBP2,Q6VBP4,Q6VBP3,Q6VBP5,Q53XZ9,Q53HR2,P15559,Q6VBP9,Q9UES8,Q5RZ99,Q6YNQ1,Q9H9P8,Q9Y6N5,Q8WUQ0,Q6TGM4,Q53S12,Q03504,Q53HW7,O00116,Q6VBQ0,Q16881,Q7Z3W5,Q6FI31,Q15067,Q5HYG7,Q1L6K4,Q5RZA0,Q1L6K6,Q9UHS8,A8MWG9,Q6ZR44,P09622,Q53G81,Q8IW48,P31040,Q99475,Q3B792,P11310,A8K5J6,Q53RD0,A8K5A2,Q6TGM5,Q6M1B7,Q12882,P00390,Q53SG6,Q59GW8,…	1895	114	19235	1.86981	0.992113	0.0392312	10.7439
UP_SEQ_FEATURE	binding site:FAD	7	0.368034	0.0170388	P49748,A4QPB4,Q1L6K4,Q5RZA0,Q1L6K6,P26440,P09622,Q53G81,O95831,Q3B792,Q53XZ9,P15559,Q53HR2,Q7Z3W5,Q15067,Q5RZ99	1886	22	19113	3.2245	1	0.494541	27.4897
GOTERM_MF_FAT	GO:0050660~FAD binding	15	0.788644	0.0533262	P49748,A4QPB4,Q0QF12,Q9NNW7,P26440,O95831,Q17RE6,Q9H845,P45954,Q6VBP2,Q6VBP4,Q6VBP3,Q6VBP5,Q53XZ9,Q6VBP9,Q53HR2,Q9UES8,Q5RZ99,Q6YNQ1,Q53S12,Q03504,O00116,Q6VBQ0,Q16881,Q7Z3W5,Q6FI31,Q5HYG7,Q15067,Q1L6K4,Q5RZA0,Q1L6K6,A8MWG9,Q6ZR44,P09622,Q8IW48,P31040,Q99475,P11310,A8K5J6,A8K5A2,Q6M1B7,Q12882,P00390,Q53SG6,Q59GW8,Q5T4U4,Q9H9W4,Q5T4U5,Q9BUX5,Q53SN7,A2RRQ3,A2RRQ2,Q59ET7,A5D8U9,Q5SQN6,Q59FN3,Q6VB42,…	1596	72	12983	1.69473	1	0.430337	58.9995
GOTERM_MF_FAT	GO:0009055~electron carrier activity	36	1.89274	0.0679934	P17516,A4QPB4,Q9NUZ0,Q8N5H5,Q0QF12,Q6FGA4,Q6FGA0,Q9H845,Q53XZ9,P15559,Q9UES8,Q5RZ99,Q6YNQ1,Q6TGM4,O60701,Q03504,O43837,P48163,Q6FI31,Q5HYG7,Q15067,Q9P1A0,Q92608,Q1L6K4,P23368,A4D0W4,Q1L6K6,A8MWG9,Q6ZR44,P11766,P09622,Q6IRT1,P61221,P31040,P11310,Q3B792,A8K5J6,Q6TGM5,Q6M1B7,Q9BRA2,Q5T4U4,Q13630,Q5T4U5,A8K7E8,P99999,Q9UDR5,Q5XG91,Q9BUX5,Q59FN3,Q5JV01,P49748,Q9NNW7,P26440,P45954,Q17RE6,O95831,Q6VBP2,…	1596	221	12983	1.32511	1	0.482515	68.1977
Annotation Cluster 99	Enrichment Score: 2.2412176119637066
Category	Term	Count	%	PValue	Genes	List Total	Pop Hits	Pop Total	Fold Enrichment	Bonferroni	Benjamini	FDR
SP_PIR_KEYWORDS	phospholipid binding	11	0.578339	1.77909e-05	Q5T0M6,P07355,Q59FI5,Q5T0M7,Q2TSD3,P17252,Q5TZZ9,Q6MZI0,Q5T3N0,Q05BR2,P08133,Q8TBV2,Q5T3N1,Q5JUN8,Q6ZP35,Q5T0G8,Q6NUL6,P50995,Q59FK3,A6NN80,Q6N0B3,P08758,Q53HM8,Q6FHB3,P04083,Q6LES2,Q6P452,Q04759,Q6AI31,Q00169,P21579,P09525,A8MTE3,Q6ICS0,P20073,Q59EP1	1895	22	19235	5.0752	0.0112162	0.000161123	0.0264707
SP_PIR_KEYWORDS	endonexin fold	7	0.368034	0.000269852	P07355,Q5T0M6,Q5T0M7,Q5TZZ9,Q6MZI0,Q5T3N0,Q05BR2,P08133,Q8TBV2,Q5T3N1,Q6ZP35,Q5T0G8,P50995,Q59FK3,A6NN80,Q6N0B3,P08758,Q53HM8,Q6FHB3,P04083,Q6LES2,Q6P452,P09525,A8MTE3,Q6ICS0,P20073,Q59EP1	1895	11	19235	6.45934	0.15727	0.00192073	0.400805
SP_PIR_KEYWORDS	annexin	7	0.368034	0.00135177	P07355,Q5T0M6,Q5T0M7,Q5TZZ9,Q6MZI0,Q5T3N0,Q05BR2,P08133,Q8TBV2,Q5T3N1,Q6ZP35,Q5T0G8,P50995,Q59FK3,A6NN80,Q6N0B3,P08758,Q53HM8,Q6FHB3,P04083,Q6LES2,Q6P452,P09525,A8MTE3,Q6ICS0,P20073,Q59EP1	1895	14	19235	5.0752	0.575821	0.00798292	1.99275
UP_SEQ_FEATURE	repeat:Annexin 1	7	0.368034	0.00136319	P07355,Q5T0M6,Q5T0M7,Q5TZZ9,Q6MZI0,Q5T3N0,Q05BR2,P08133,Q8TBV2,Q5T3N1,Q6ZP35,Q5T0G8,P50995,Q59FK3,A6NN80,Q6N0B3,P08758,Q53HM8,Q6FHB3,P04083,Q6LES2,Q6P452,P09525,A8MTE3,Q6ICS0,P20073,Q59EP1	1886	14	19113	5.06707	0.996957	0.0865654	2.51918
UP_SEQ_FEATURE	repeat:Annexin 3	7	0.368034	0.00136319	P07355,Q5T0M6,Q5T0M7,Q5TZZ9,Q6MZI0,Q5T3N0,Q05BR2,P08133,Q8TBV2,Q5T3N1,Q6ZP35,Q5T0G8,P50995,Q59FK3,A6NN80,Q6N0B3,P08758,Q53HM8,Q6FHB3,P04083,Q6LES2,Q6P452,P09525,A8MTE3,Q6ICS0,P20073,Q59EP1	1886	14	19113	5.06707	0.996957	0.0865654	2.51918
UP_SEQ_FEATURE	repeat:Annexin 2	7	0.368034	0.00136319	P07355,Q5T0M6,Q5T0M7,Q5TZZ9,Q6MZI0,Q5T3N0,Q05BR2,P08133,Q8TBV2,Q5T3N1,Q6ZP35,Q5T0G8,P50995,Q59FK3,A6NN80,Q6N0B3,P08758,Q53HM8,Q6FHB3,P04083,Q6LES2,Q6P452,P09525,A8MTE3,Q6ICS0,P20073,Q59EP1	1886	14	19113	5.06707	0.996957	0.0865654	2.51918
UP_SEQ_FEATURE	repeat:Annexin 4	7	0.368034	0.00136319	P07355,Q5T0M6,Q5T0M7,Q5TZZ9,Q6MZI0,Q5T3N0,Q05BR2,P08133,Q8TBV2,Q5T3N1,Q6ZP35,Q5T0G8,P50995,Q59FK3,A6NN80,Q6N0B3,P08758,Q53HM8,Q6FHB3,P04083,Q6LES2,Q6P452,P09525,A8MTE3,Q6ICS0,P20073,Q59EP1	1886	14	19113	5.06707	0.996957	0.0865654	2.51918
SMART	SM00335:ANX	7	0.368034	0.00145914	P07355,Q5T0M6,Q5T0M7,Q5TZZ9,Q6MZI0,Q5T3N0,Q05BR2,P08133,Q8TBV2,Q5T3N1,Q6ZP35,Q5T0G8,P50995,Q59FK3,A6NN80,Q6N0B3,P08758,Q53HM8,Q6FHB3,P04083,Q6LES2,Q6P452,P09525,A8MTE3,Q6ICS0,P20073,Q59EP1	909	14	9079	4.99395	0.345222	0.0174894	1.92246
SP_PIR_KEYWORDS	calcium/phospholipid-binding	7	0.368034	0.00206635	P07355,Q5T0M6,Q5T0M7,Q5TZZ9,Q6MZI0,Q5T3N0,Q05BR2,P08133,Q8TBV2,Q5T3N1,Q6ZP35,Q5T0G8,P50995,Q59FK3,A6NN80,Q6N0B3,P08758,Q53HM8,Q6FHB3,P04083,Q6LES2,Q6P452,P09525,A8MTE3,Q6ICS0,P20073,Q59EP1	1895	15	19235	4.73685	0.730564	0.0118513	3.03116
INTERPRO	IPR001464:Annexin	7	0.368034	0.00221757	P07355,Q5T0M6,Q5T0M7,Q5TZZ9,Q6MZI0,Q5T3N0,Q05BR2,P08133,Q8TBV2,Q5T3N1,Q6ZP35,Q5T0G8,P50995,Q59FK3,A6NN80,Q6N0B3,P08758,Q53HM8,Q6FHB3,P04083,Q6LES2,Q6P452,P09525,A8MTE3,Q6ICS0,P20073,Q59EP1	1804	14	16659	4.61724	0.994073	0.0660917	3.8068
INTERPRO	IPR018252:Annexin repeat, conserved site	7	0.368034	0.00221757	P07355,Q5T0M6,Q5T0M7,Q5TZZ9,Q6MZI0,Q5T3N0,Q05BR2,P08133,Q8TBV2,Q5T3N1,Q6ZP35,Q5T0G8,P50995,Q59FK3,A6NN80,Q6N0B3,P08758,Q53HM8,Q6FHB3,P04083,Q6LES2,Q6P452,P09525,A8MTE3,Q6ICS0,P20073,Q59EP1	1804	14	16659	4.61724	0.994073	0.0660917	3.8068
INTERPRO	IPR018502:Annexin repeat	7	0.368034	0.00221757	P07355,Q5T0M6,Q5T0M7,Q5TZZ9,Q6MZI0,Q5T3N0,Q05BR2,P08133,Q8TBV2,Q5T3N1,Q6ZP35,Q5T0G8,P50995,Q59FK3,A6NN80,Q6N0B3,P08758,Q53HM8,Q6FHB3,P04083,Q6LES2,Q6P452,P09525,A8MTE3,Q6ICS0,P20073,Q59EP1	1804	14	16659	4.61724	0.994073	0.0660917	3.8068
GOTERM_MF_FAT	GO:0005544~calcium-dependent phospholipid binding	8	0.42061	0.0333154	Q5T0M6,P07355,Q9NTZ6,Q5T0M7,Q5TZZ9,Q6MZI0,Q5JX58,Q5JX59,Q5T3N0,Q05BR2,P08133,Q8TBV2,Q5T3N1,Q5JX52,Q6ZP35,Q5T0G8,Q69YJ7,P50995,Q59FK3,A6NN80,Q6N0B3,P08758,Q53HM8,Q6FHB3,Q99829,Q59EI4,P04083,Q6LES2,Q6P452,Q5JX44,Q5JX45,P09525,A8MTE3,Q6ICS0,P20073,Q5JX60,Q5JX61,Q59EP1	1596	26	12983	2.50299	1	0.332169	42.3779
PIR_SUPERFAMILY	PIRSF002359:annexin I	5	0.262881	0.0621912	P07355,P04083,Q6LES2,Q6P452,Q5TZZ9,Q6MZI0,Q5T3N0,Q05BR2,P08133,Q5T3N1,Q8TBV2,Q6ZP35,P09525,A8MTE3,Q59FK3,A6NN80,Q6N0B3,P08758,Q6FHB3	976	12	7396	3.15745	1	0.932165	63.1366
GOTERM_MF_FAT	GO:0004859~phospholipase inhibitor activity	4	0.210305	0.175307	P07355,P04083,Q6LES2,Q6P452,Q5TZZ9,Q6MZI0,Q5T3N0,Q05BR2,Q5T3N1,Q8TBV2,P09525,A8MTE3,Q59FK3,Q6N0B3,P08758,Q6FHB3	1596	12	12983	2.71157	1	0.747248	95.6538
GOTERM_MF_FAT	GO:0055102~lipase inhibitor activity	4	0.210305	0.277533	P07355,P04083,Q6LES2,Q6P452,Q5TZZ9,Q6MZI0,Q5T3N0,Q05BR2,Q5T3N1,Q8TBV2,P09525,A8MTE3,Q59FK3,Q6N0B3,P08758,Q6FHB3	1596	15	12983	2.16926	1	0.872955	99.4953
GOTERM_BP_FAT	GO:0050818~regulation of coagulation	5	0.262881	0.735538	P07355,P08567,Q6LES2,Q6P452,Q6MZI0,Q03135,Q8TBV2,P09525,A8MTE3,Q59FK3,Q6N0B3,Q59GZ2,P08758,Q2TNI1,Q6FGQ1,Q6FHB3	1611	41	13528	1.02406	1	0.998946	100
GOTERM_BP_FAT	GO:0050819~negative regulation of coagulation	3	0.157729	0.832924	P07355,Q6LES2,P09525,A8MTE3,Q6P452,Q6MZI0,Q59FK3,Q6N0B3,P08758,Q6FHB3,Q8TBV2	1611	26	13528	0.968916	1	0.999852	100
Annotation Cluster 100	Enrichment Score: 2.1934099131974785
Category	Term	Count	%	PValue	Genes	List Total	Pop Hits	Pop Total	Fold Enrichment	Bonferroni	Benjamini	FDR
INTERPRO	IPR015505:Coronin	5	0.262881	0.00365509	P31146,Q53G58,Q6QEF8,Q9ULV4,P57737,Q9BR76,Q9NSK3,Q59EA2,Q17RK4	1804	7	16659	6.59606	0.999788	0.100336	6.2011
INTERPRO	IPR015049:Region of unknown function DUF1900	5	0.262881	0.00365509	P31146,Q53G58,Q6QEF8,Q9ULV4,P57737,Q9BR76,Q9NSK3,Q59EA2,Q17RK4	1804	7	16659	6.59606	0.999788	0.100336	6.2011
INTERPRO	IPR015048:Region of unknown function DUF1899	4	0.210305	0.0196776	P31146,Q53G58,Q6QEF8,Q9ULV4,Q9BR76,Q9NSK3,Q59EA2	1804	6	16659	6.15632	1	0.351504	29.3508
Annotation Cluster 101	Enrichment Score: 2.1744644450831174
Category	Term	Count	%	PValue	Genes	List Total	Pop Hits	Pop Total	Fold Enrichment	Bonferroni	Benjamini	FDR
GOTERM_BP_FAT	GO:0012501~programmed cell death	98	5.15247	0.00166397	A4QPB4,Q96GX9,Q96G51,Q8IXI2,Q308M2,A8K515,A2A418,Q4VJB6,Q4W4Y1,Q53R94,Q7Z453,A1L4K2,Q53XZ5,Q13564,Q0EF63,Q59F45,Q2XSC7,Q0EF62,Q6VBB7,Q6J333,Q96GF2,Q8WUW7,P23396,Q9UK67,Q6PK95,Q05C84,Q14814,Q14BD3,Q92934,Q14BD4,Q9BZZ5,Q13464,P54577,Q5T9U5,Q6LEN1,Q02078,Q5T9U4,Q5T9U6,Q9UKV3,P62258,Q6FGZ2,Q53SY1,Q6NR85,O60313,Q49A90,Q9P1A0,Q96AM7,Q8TD98,Q1L6K4,P06239,Q05BX6,Q2TSD2,Q19RW5,Q1L6K6,Q96F07,Q8N163,Q4VBY6,…	1611	611	13528	1.34686	0.997964	0.0271655	3.02401
GOTERM_BP_FAT	GO:0006915~apoptosis	95	4.99474	0.00320482	A4QPB4,Q96GX9,Q96G51,Q8IXI2,A8K515,Q308M2,A2A418,Q4VJB6,Q4W4Y1,Q53R94,Q7Z453,A1L4K2,Q53XZ5,Q13564,Q59F45,Q0EF63,Q0EF62,Q2XSC7,Q6VBB7,P23396,Q6J333,Q96GF2,Q9UK67,Q05C84,Q14814,Q92934,Q14BD3,Q14BD4,Q9BZZ5,Q13464,P54577,Q6LEN1,Q5T9U5,Q5T9U4,Q02078,Q5T9U6,Q9UKV3,P62258,Q6FGZ2,Q53SY1,O60313,Q6NR85,Q49A90,Q9P1A0,Q96AM7,Q8TD98,Q1L6K4,P06239,Q05BX6,Q2TSD2,Q19RW5,Q1L6K6,Q96F07,Q8N163,Q4VBY6,Q96FV9,Q0ZAI9,…	1611	602	13528	1.32515	0.999994	0.0475829	5.74696
GOTERM_BP_FAT	GO:0016265~death	110	5.78339	0.00512465	A4QPB4,Q96GX9,Q96G51,Q8IXI2,Q308M2,A8K515,Q8IWY7,A2A418,Q4VJB6,Q4W4Y1,Q86V38,Q53R94,Q7Z453,A1L4K2,Q53XZ5,Q13564,Q0EF63,Q59F45,Q2XSC7,Q0EF62,Q6VBB7,Q6J333,Q96GF2,Q8WUW7,P23396,Q9UK67,Q6PK95,Q05C84,Q14814,Q14BD3,Q92934,Q14BD4,Q9BZZ5,Q13464,P54577,P41250,Q5T9U5,Q6LEN1,Q02078,Q5T9U4,Q5T9U6,Q9UKV3,P62258,Q6FGZ2,Q53SY1,Q6NR85,O60313,Q49A90,Q9P1A0,Q59F36,Q96AM7,Q8TD98,Q1L6K4,P06239,A8K4R4,Q05BX6,Q2TSD2,…	1611	724	13528	1.27583	1	0.0708919	9.03851
GOTERM_BP_FAT	GO:0008219~cell death	109	5.73081	0.00570206	A4QPB4,Q96GX9,Q96G51,Q8IXI2,Q308M2,A8K515,Q8IWY7,A2A418,Q4VJB6,Q4W4Y1,Q86V38,Q53R94,Q7Z453,A1L4K2,Q53XZ5,Q13564,Q0EF63,Q59F45,Q2XSC7,Q0EF62,Q6VBB7,Q6J333,Q96GF2,Q8WUW7,P23396,Q9UK67,Q6PK95,Q05C84,Q14814,Q14BD3,Q92934,Q14BD4,Q9BZZ5,Q13464,P54577,P41250,Q5T9U5,Q6LEN1,Q02078,Q5T9U4,Q5T9U6,Q9UKV3,P62258,Q6FGZ2,Q53SY1,Q6NR85,O60313,Q49A90,Q9P1A0,Q59F36,Q96AM7,Q8TD98,Q1L6K4,P06239,A8K4R4,Q05BX6,Q2TSD2,…	1611	719	13528	1.27302	1	0.0771556	10.007
SP_PIR_KEYWORDS	Apoptosis	47	2.47108	0.0861059	Q01085,A4QPB4,Q96GX9,Q12904,Q9HAU6,A8K515,Q4W4Y1,Q6PEK6,Q69YJ6,Q13564,Q59GX4,Q2XSC7,Q59EI9,Q5RZ99,Q05C84,Q14814,Q96S99,Q13153,Q92934,Q0VAM0,Q9BZZ5,Q13464,Q8WYA6,Q6PK02,Q53GA5,Q5T9U5,Q86YK6,Q02078,Q5T9U4,Q5T9U6,Q9UKV3,A8K5M4,A8K5M2,Q49AS9,O60313,Q6FH21,Q9HB80,Q8TD98,Q1L6K4,Q9NWH9,Q05BX6,Q2TSD2,Q19RW5,Q1L6K6,Q96F07,Q4VBY6,Q8N163,Q96FV9,Q6I9V5,P51398,Q5QPR3,Q5QPR4,Q53SD0,A8K3T0,Q59GZ4,Q5U0E4,Q969X9,…	1895	381	19235	1.25215	1	0.273062	73.8118
Annotation Cluster 102	Enrichment Score: 2.1560340350429197
Category	Term	Count	%	PValue	Genes	List Total	Pop Hits	Pop Total	Fold Enrichment	Bonferroni	Benjamini	FDR
UP_SEQ_FEATURE	repeat:HEAT 7	10	0.525762	0.000286031	O75155,Q14974,Q4LE60,Q6NSH4,A8K7B7,O75533,Q05D48,P30153,O14787,Q2TA89,Q86VP6,A8K1K5,Q32Q20,Q8NAH3,Q6IN77,Q7Z497,P42345,Q96T76,Q4LE76,Q9NTB4,A0JLT9,Q14008,Q8NB89,A6NL14,Q0VAX8,Q0VAX7,Q8IYN5,O14980,Q05D70,Q53XN2,Q96QW8	1886	24	19113	4.22256	0.703359	0.027241	0.533639
UP_SEQ_FEATURE	repeat:HEAT 5	12	0.630915	0.000370675	O75155,Q14974,Q4LE60,Q6NSH4,Q6IEH8,A8K7B7,O75533,Q05D48,O14787,P30153,Q5SWC3,Q2TA89,Q86VP6,O43432,A8K1K5,Q32Q20,Q8NAH3,Q6IN77,Q7Z497,P42345,Q96T76,Q4LE76,Q9NTB4,Q6KC79,A0JLT9,Q14008,Q59GJ0,Q8NB89,A6NL14,Q0VAX8,Q0VAX7,Q8IYN5,O14980,Q05D70,Q53XN2,Q96QW8,Q504Z1	1886	35	19113	3.47456	0.792976	0.0329537	0.691041
UP_SEQ_FEATURE	repeat:HEAT 8	8	0.42061	0.00155339	O75155,Q14974,Q4LE60,Q6NSH4,A8K7B7,O75533,Q05D48,P30153,O14787,Q2TA89,Q86VP6,A8K1K5,Q32Q20,Q8NAH3,Q6IN77,Q7Z497,Q9NTB4,A0JLT9,Q14008,Q8NB89,A6NL14,Q0VAX8,Q0VAX7,O14980,Q8IYN5,Q05D70,Q53XN2	1886	19	19113	4.26701	0.998645	0.093864	2.86585
UP_SEQ_FEATURE	repeat:HEAT 6	10	0.525762	0.0018159	O75155,Q14974,Q4LE60,Q6NSH4,A8K7B7,O75533,Q05D48,P30153,O14787,Q2TA89,Q86VP6,A8K1K5,Q32Q20,Q8NAH3,Q6IN77,Q7Z497,P42345,Q96T76,Q4LE76,Q9NTB4,A0JLT9,Q14008,Q8NB89,A6NL14,Q0VAX8,Q0VAX7,Q8IYN5,O14980,Q05D70,Q53XN2,Q96QW8	1886	30	19113	3.37805	0.999557	0.105865	3.34242
UP_SEQ_FEATURE	repeat:HEAT 10	7	0.368034	0.00208352	O75155,Q4LE60,Q6NSH4,A8K7B7,O75533,Q05D48,P30153,O14787,Q2TA89,Q86VP6,A8K1K5,Q32Q20,Q8NAH3,Q6IN77,Q7Z497,Q9NTB4,A0JLT9,Q14008,Q8NB89,A6NL14,Q0VAX8,Q0VAX7,O14980,Q8IYN5,Q05D70	1886	15	19113	4.72927	0.999858	0.115786	3.82597
UP_SEQ_FEATURE	repeat:HEAT 9	7	0.368034	0.00208352	O75155,Q4LE60,Q6NSH4,A8K7B7,O75533,Q05D48,P30153,O14787,Q2TA89,Q86VP6,A8K1K5,Q32Q20,Q8NAH3,Q6IN77,Q7Z497,Q9NTB4,A0JLT9,Q14008,Q8NB89,A6NL14,Q0VAX8,Q0VAX7,O14980,Q8IYN5,Q05D70	1886	15	19113	4.72927	0.999858	0.115786	3.82597
INTERPRO	IPR011989:Armadillo-like helical	26	1.36698	0.00244459	Q4LE60,P55060,Q6NSH4,Q20WL3,O00203,A8K7B7,O14787,P30153,Q9UFK5,Q99460,Q8IY97,P63010,Q05CW6,Q7Z451,Q96EL6,A8K1K5,Q32Q20,Q4W5T8,Q14671,Q8NAH3,Q9HAV4,Q7Z497,O43747,A6NJP3,Q8N9K4,Q99569,Q0VAM0,Q53TM5,A0JLT9,Q8WYA6,Q86W91,A6NL14,P52306,Q4KMV2,Q53ET1,A8K6F7,Q05D70,Q10567,Q3MNE1,O95782,Q6U7G8,Q68DI0,Q14974,Q05BX4,Q05D48,O75533,Q6LCG8,Q2TA89,Q86VP6,O94973,Q6IN77,Q4QQI8,P42345,Q9H3U1,Q86X54,Q86VV8,Q96T76,…	1804	128	16659	1.87575	0.996496	0.0707965	4.18871
UP_SEQ_FEATURE	repeat:HEAT 4	12	0.630915	0.00244569	O75155,Q14974,Q4LE60,Q6NSH4,Q6IEH8,A8K7B7,O75533,Q05D48,O14787,P30153,Q5SWC3,Q2TA89,Q86VP6,O43432,A8K1K5,Q32Q20,Q8NAH3,Q6IN77,Q7Z497,P42345,Q96T76,Q4LE76,Q9NTB4,Q6KC79,A0JLT9,Q14008,Q59GJ0,Q8NB89,A6NL14,Q0VAX8,Q0VAX7,Q8IYN5,O14980,Q05D70,Q53XN2,Q96QW8,Q504Z1	1886	43	19113	2.82813	0.99997	0.129505	4.47673
UP_SEQ_FEATURE	repeat:HEAT 3	12	0.630915	0.00837745	O75155,Q14974,Q4LE60,Q6NSH4,Q6IEH8,A8K7B7,O75533,Q05D48,O14787,P30153,Q5SWC3,Q2TA89,Q86VP6,O43432,A8K1K5,Q32Q20,Q8NAH3,Q6IN77,Q7Z497,P42345,Q96T76,Q4LE76,Q9NTB4,Q6KC79,A0JLT9,Q14008,Q59GJ0,Q8NB89,A6NL14,Q0VAX8,Q0VAX7,Q8IYN5,O14980,Q05D70,Q53XN2,Q96QW8,Q504Z1	1886	50	19113	2.4322	1	0.308178	14.5597
UP_SEQ_FEATURE	repeat:HEAT 1	13	0.683491	0.00997478	O75155,Q14974,Q4LE60,Q6IEH8,Q6NSH4,A8K7B7,O75533,Q05D48,P30153,O14787,Q5SWC3,Q2TA89,P78527,Q86VP6,O43432,A8K1K5,Q32Q20,Q8NAH3,Q6IN77,Q7Z497,P42345,Q96T76,Q4LE76,Q9NTB4,A0JLT9,Q6KC79,Q14008,Q59GJ0,Q8NB89,A6NL14,Q0VAX8,Q0VAX7,Q8IYN5,O14980,Q05D70,Q96QW8,Q53XN2,Q504Z1	1886	58	19113	2.27145	1	0.34679	17.0975
UP_SEQ_FEATURE	repeat:HEAT 2	13	0.683491	0.00997478	O75155,Q14974,Q4LE60,Q6IEH8,Q6NSH4,A8K7B7,O75533,Q05D48,P30153,O14787,Q5SWC3,Q2TA89,P78527,Q86VP6,O43432,A8K1K5,Q32Q20,Q8NAH3,Q6IN77,Q7Z497,P42345,Q96T76,Q4LE76,Q9NTB4,A0JLT9,Q6KC79,Q14008,Q59GJ0,Q8NB89,A6NL14,Q0VAX8,Q0VAX7,Q8IYN5,O14980,Q05D70,Q96QW8,Q53XN2,Q504Z1	1886	58	19113	2.27145	1	0.34679	17.0975
INTERPRO	IPR000357:HEAT	13	0.683491	0.0131558	O75155,Q14974,Q4LE60,Q9NXF1,Q6NSH4,A8K7B7,O75533,Q05D48,O14787,P30153,Q2TA89,P78527,Q86VP6,Q32Q20,Q8NAH3,Q6IN77,Q7Z497,Q96Q15,Q96T76,Q9NTI5,Q96DB6,Q9NTB4,Q29RF7,A0JLT9,Q14008,Q8NB89,Q0VAX8,Q0VAX7,Q8IYN5,Q05D70,Q53XN2	1804	55	16659	2.1827	1	0.268135	20.6675
UP_SEQ_FEATURE	repeat:HEAT 11	5	0.262881	0.017647	O75155,Q4LE60,Q9NTB4,A8K7B7,O75533,Q05D48,P30153,A0JLT9,O14787,Q8NB89,Q86VP6,Q32Q20,Q6IN77,Q7Z497	1886	11	19113	4.60643	1	0.50357	28.3242
UP_SEQ_FEATURE	repeat:HEAT 12	4	0.210305	0.0677922	O75155,Q4LE60,Q6IN77,A8K7B7,Q05D48,O14787,P30153,Q86VP6,Q8NB89	1886	10	19113	4.05366	1	0.891979	73.0991
UP_SEQ_FEATURE	repeat:HEAT 13	4	0.210305	0.0677922	O75155,Q4LE60,Q6IN77,A8K7B7,Q05D48,O14787,P30153,Q86VP6,Q8NB89	1886	10	19113	4.05366	1	0.891979	73.0991
UP_SEQ_FEATURE	repeat:HEAT 15	3	0.157729	0.146266	O75155,A8K7B7,P30153,Q86VP6,Q8NB89	1886	7	19113	4.34321	1	0.988307	94.8065
UP_SEQ_FEATURE	repeat:HEAT 14	3	0.157729	0.220409	O75155,A8K7B7,P30153,Q86VP6,Q8NB89	1886	9	19113	3.37805	1	0.998355	99.0505
Annotation Cluster 103	Enrichment Score: 2.1533316080059635
Category	Term	Count	%	PValue	Genes	List Total	Pop Hits	Pop Total	Fold Enrichment	Bonferroni	Benjamini	FDR
INTERPRO	IPR010987:Glutathione S-transferase, C-terminal-like	13	0.683491	2.2135e-05	Q5TA02,P56192,P78417,Q8TB36,Q8TC98,Q5T8R1,Q9Y696,Q6ZSP8,Q53FB0,O43708,P09488,Q5T8R2,Q9NVF8,Q5SRT3,Q53YD7,A6NED0,Q2F840,Q2F838,P46439,Q5T8Q9,P26640,Q16041,P26641,O00299,P07814,P09211,Q3KQZ8,O43324	1804	29	16659	4.13959	0.0498471	0.00159661	0.0386903
UP_SEQ_FEATURE	domain:GST C-terminal	13	0.683491	4.01932e-05	Q5TA02,P56192,P78417,A8K795,Q8TB36,Q8TC98,Q5T8R1,Q9Y696,Q6ZSP8,Q53FB0,O43708,P09488,Q5T8R2,Q9NVF8,Q5SRT3,Q53YD7,A6NED0,Q2F840,Q2F838,P46439,Q5T8Q9,P26640,Q16041,P26641,O00299,P09211,O43324,P24534	1886	33	19113	3.99224	0.156963	0.00567531	0.0751507
INTERPRO	IPR004046:Glutathione S-transferase, C-terminal	10	0.525762	0.000174335	Q5TA02,P56192,P78417,Q2F838,P46439,Q5T8Q9,Q8TB36,Q8TC98,Q16041,P26640,P26641,Q5T8R1,P09211,Q6ZSP8,O43324,P09488,O43708,Q5T8R2,Q53YD7,Q2F840,A6NED0	1804	21	16659	4.39737	0.33152	0.0105427	0.304342
INTERPRO	IPR017933:Glutathione S-transferase/chloride channel, C-terminal	12	0.630915	0.000178851	Q5TA02,P56192,P78417,Q8TB36,Q8TC98,Q5T8R1,Q9Y696,Q6ZSP8,Q53FB0,O43708,P09488,Q5T8R2,Q9NVF8,Q5SRT3,Q53YD7,A6NED0,Q2F840,Q2F838,P46439,Q5T8Q9,P26640,Q16041,P26641,O00299,P09211,O43324	1804	30	16659	3.69379	0.338458	0.0105385	0.312214
INTERPRO	IPR004045:Glutathione S-transferase, N-terminal	8	0.42061	0.00676442	Q5TA02,P78417,Q2F838,P46439,Q5T8Q9,Q8TB36,Q8TC98,Q16041,P26640,P26641,Q5T8R1,P09211,Q6ZSP8,P09488,O43708,Q5T8R2,Q53YD7,Q2F840,A6NED0	1804	22	16659	3.35799	1	0.161522	11.1891
KEGG_PATHWAY	hsa00480:Glutathione metabolism	16	0.84122	0.00861656	Q5TA02,A4QPB4,Q2NLC8,P78417,Q0QER2,Q6P4H0,P48735,Q8TC98,Q7Z3V0,O95831,P48507,Q6FHQ6,Q5T8R1,Q6PI42,Q567U4,Q6FII1,Q6ZSP8,Q2VF42,Q5YKL1,P09488,O43708,Q2Q9B7,Q5T8R2,A6NED0,Q13584,Q6FIA4,P00390,Q6PJX4,Q0PHS1,A8K334,Q03504,Q53GZ5,Q0PHS4,P46439,Q2Q9H2,Q5T8Q9,Q9Y2Q3,Q16041,P23921,Q53GL5,P09211,O75874,Q6FI37,P52209,P11413,P28838,P36969	808	50	5085	2.01386	0.772321	0.0597966	10.0288
UP_SEQ_FEATURE	domain:GST N-terminal	7	0.368034	0.0134932	Q5TA02,P78417,Q2F838,P46439,Q5T8Q9,Q8TB36,Q8TC98,Q16041,P26641,Q5T8R1,P09211,Q6ZSP8,P09488,O43708,Q5T8R2,Q53YD7,Q2F840,A6NED0	1886	21	19113	3.37805	1	0.425868	22.4381
GOTERM_MF_FAT	GO:0016765~transferase activity, transferring alkyl or aryl (other than methyl) groups	12	0.630915	0.0327066	Q5TA02,Q9NR45,A8K511,Q2NLC8,P78417,P31153,Q6P4H0,Q96G29,Q8TC98,A8K2L0,P14324,Q68Y91,Q5T8R1,Q6FII1,Q6ZSP8,P09488,O43708,Q5T8R2,A6NED0,P08397,O95749,Q53SG6,Q53S12,P46439,Q5T8Q9,Q9Y2Q3,Q16041,Q53SN7,O00116,A5D8U9,P09211,Q6LER4,Q0G847	1596	49	12983	1.99217	1	0.329674	41.7845
GOTERM_MF_FAT	GO:0004364~glutathione transferase activity	6	0.315457	0.0894572	Q5TA02,Q2NLC8,P78417,Q6P4H0,P46439,Q5T8Q9,Q9Y2Q3,Q8TC98,Q16041,Q5T8R1,P09211,Q6FII1,Q6ZSP8,O43708,P09488,Q5T8R2,A6NED0	1596	20	12983	2.44041	1	0.560428	78.2313
KEGG_PATHWAY	hsa00980:Metabolism of xenobiotics by cytochrome P450	11	0.578339	0.487156	Q5TA02,P17516,P52895,Q2XPP3,Q2NLC8,A8K828,P78417,Q6P4H0,P11766,Q7M4N1,Q8TC98,Q6IRT1,P30838,Q5T8R1,Q5U043,Q96SD9,Q6FII1,Q6ZSP8,P09488,Q8N9T9,O43708,Q5T8R2,A6NED0,A8K2V0,A8K2N9,Q6PKA6,Q6FI45,P46439,Q5T8Q9,Q9Y2Q3,Q16041,Q59GU2,Q5SR16,P09211,P42330	808	60	5085	1.15377	1	0.808897	99.9713
PIR_SUPERFAMILY	PIRSF000503:glutathione transferase	3	0.157729	0.526786	Q16041,Q5T8R1,P09211,Q6ZSP8,P09488,Q5T8R2,P46439,Q5T8Q9,Q8TC98	976	13	7396	1.74874	1	1	99.9991
KEGG_PATHWAY	hsa00982:Drug metabolism	8	0.42061	0.882437	Q5TA02,A8K828,Q2NLC8,P78417,Q6P4H0,P11766,Q8TC98,P30838,Q6IRT1,Q5T8R1,Q5U043,Q6ZSP8,Q6FII1,Q8N9T9,O43708,P09488,Q5T8R2,A6NED0,Q6PKA6,Q6FI45,P46439,Q5T8Q9,Q9Y2Q3,Q16041,P09211	808	62	5085	0.812041	1	0.96939	100
Annotation Cluster 104	Enrichment Score: 2.142053069081692
Category	Term	Count	%	PValue	Genes	List Total	Pop Hits	Pop Total	Fold Enrichment	Bonferroni	Benjamini	FDR
GOTERM_BP_FAT	GO:0016192~vesicle-mediated transport	95	4.99474	0.000804016	Q9NTZ6,Q8TAR2,Q8NF52,O75351,O00203,Q20WL3,A8K9B9,Q8IY97,A2A418,Q9UE82,Q32Q12,Q59EA2,Q9H115,Q86TQ3,Q7Z451,Q96EL6,P11142,Q7Z453,Q53F62,Q8WU86,Q5HY53,A6NM19,A8K1G0,A8K6G8,Q96BE0,Q6J333,Q5HY55,A6NJP3,Q5HY54,Q9UJU6,Q2F831,A1YCA4,Q9BZZ3,Q14BD3,Q14BD4,P41250,Q6S4P3,Q6FGZ2,Q53ET1,Q86TP8,O95782,Q3MNE1,Q503A9,Q13596,A8K4R4,O95249,Q05BX6,Q6FGK3,Q60FE6,Q6PIW8,P35606,Q9NP61,Q9NZN4,Q9UPH5,O43264,Q60FE5,Q6PJ82,…	1611	576	13528	1.38497	0.949861	0.0147073	1.47214
GOTERM_BP_FAT	GO:0016044~membrane organization	67	3.52261	0.00101688	O00203,Q20WL3,A8K9B9,Q2VPJ6,P43034,Q8IY97,Q9UE82,Q32Q12,Q59EA2,P11142,Q7Z453,Q53F62,Q8WU86,A6NM19,Q96BE0,Q2XSC7,Q6J333,Q9UJU6,Q14BD3,Q14BD4,Q5I6Y6,Q5I6Y4,Q5I6Y5,Q6S4P3,O15228,Q86U12,Q8TBA7,Q53ET1,O95782,Q3MNE1,O60313,Q6NR85,Q2YDB7,Q13596,Q05BX6,Q19RW5,Q7KYN0,Q6FGK3,O95140,P35606,Q9NZN4,Q9UPH5,Q05193,Q96CZ4,Q6FIA3,Q5T0S2,Q9NP72,Q53GZ6,Q6ZTU8,P06576,Q5T0R7,Q53HL9,Q5T0R6,Q5T0R9,Q86VD2,Q5T0R3,Q5T0R2,…	1611	381	13528	1.47669	0.977308	0.017782	1.85845
SP_PIR_KEYWORDS	Endocytosis	18	0.946372	0.0120508	Q5SYX2,Q1ED40,Q5SYX0,Q9UMZ2,O00203,Q20WL3,Q15811,Q6GMY7,Q9UFK5,Q2LAE2,Q8IY97,Q59GI5,Q96RU3,Q32Q12,Q7Z453,Q9P207,Q8WU86,Q9UNF0,Q5T1M5,Q6J333,O43747,Q9UJU6,Q59FH4,Q8N9K4,Q14BD3,Q14BD4,P50570,Q8ND92,Q2Q1W1,Q9Y4N0,Q6PD56,A8K1B6,Q53ET1,Q9UET4,Q3MNE1,Q10567,O95782,Q14C86,Q8N1K8,Q6FHN3,Q0PW95,Q0PW96,A8MYK3,Q6LCT6,Q9UJ41,Q0PW94,Q9UQ16,Q9NXQ1,Q05BX6,Q0PW97,Q6FGK3,Q9UPH5,Q96CZ4,Q7Z328,Q05193,P22392,O94973,…	1895	96	19235	1.9032	0.999541	0.0582842	16.5075
GOTERM_BP_FAT	GO:0006897~endocytosis	36	1.89274	0.0444725	Q1ED40,Q20WL3,O00203,Q9ULV4,A8K9B9,Q8IY97,Q59GI5,Q59EA2,Q32Q12,Q7Z453,Q8WU86,A6NM19,Q9UNF0,Q6J333,Q9UJU6,P31146,Q59FH4,Q8N9K4,Q14BD3,Q14BD4,P50570,Q2Q1W1,Q59EZ3,Q6PD56,Q53ET1,O95782,Q3MNE1,Q9UET4,Q8NCJ3,Q13596,Q6LCT6,Q9UQ16,Q05BX6,Q6FGK3,Q70J99,Q9NZN4,Q0QEN7,Q9UPH5,Q9H223,Q96CZ4,Q05193,P22392,O94973,Q2TNI1,Q6IAW3,Q6FIA3,Q5T0S2,Q15276,Q9NP72,Q6ZSZ9,Q6ZTU8,A8MWA3,P06576,Q5T0R7,Q53HL9,Q5T0R6,Q5T0R9,…	1611	220	13528	1.3741	1	0.365577	56.7771
GOTERM_BP_FAT	GO:0010324~membrane invagination	36	1.89274	0.0444725	Q1ED40,Q20WL3,O00203,Q9ULV4,A8K9B9,Q8IY97,Q59GI5,Q59EA2,Q32Q12,Q7Z453,Q8WU86,A6NM19,Q9UNF0,Q6J333,Q9UJU6,P31146,Q59FH4,Q8N9K4,Q14BD3,Q14BD4,P50570,Q2Q1W1,Q59EZ3,Q6PD56,Q53ET1,O95782,Q3MNE1,Q9UET4,Q8NCJ3,Q13596,Q6LCT6,Q9UQ16,Q05BX6,Q6FGK3,Q70J99,Q9NZN4,Q0QEN7,Q9UPH5,Q9H223,Q96CZ4,Q05193,P22392,O94973,Q2TNI1,Q6IAW3,Q6FIA3,Q5T0S2,Q15276,Q9NP72,Q6ZSZ9,Q6ZTU8,A8MWA3,P06576,Q5T0R7,Q53HL9,Q5T0R6,Q5T0R9,…	1611	220	13528	1.3741	1	0.365577	56.7771
Annotation Cluster 105	Enrichment Score: 2.1388463570707565
Category	Term	Count	%	PValue	Genes	List Total	Pop Hits	Pop Total	Fold Enrichment	Bonferroni	Benjamini	FDR
SMART	SM00053:DYNc	8	0.42061	9.76766e-05	Q8NCJ3,Q5SYX2,Q9UQ16,Q5SYX0,O95140,A8K9B9,Q9NZN4,Q59GI5,Q9UPH5,Q9H223,Q05193,Q32Q67,Q6PEK6,O00429,A8K1B3,P50570,Q6P3T6,Q6ZSZ9,Q6ZTU8,Q6ZV85,Q59GN9,A8K4X9,A8K1B6,A6NLM6,Q86VD2,O60313,Q8N1K8	909	13	9079	6.1464	0.0279301	0.00217667	0.129772
INTERPRO	IPR001401:Dynamin, GTPase region	8	0.42061	0.000163395	Q8NCJ3,Q5SYX2,Q9UQ16,Q5SYX0,O95140,A8K9B9,Q9NZN4,Q59GI5,Q9UPH5,Q9H223,Q05193,Q32Q67,Q6PEK6,O00429,A8K1B3,P50570,Q6P3T6,Q6ZSZ9,Q6ZTU8,Q6ZV85,Q59GN9,A8K4X9,A8K1B6,A6NLM6,Q86VD2,O60313,Q8N1K8	1804	13	16659	5.68276	0.314408	0.0101501	0.285269
INTERPRO	IPR019762:Dynamin, GTPase region, conserved site	5	0.262881	0.00365509	Q5SYX2,Q9UQ16,Q5SYX0,P50570,Q6P3T6,Q59GI5,Q9UPH5,Q6ZTU8,Q6ZSZ9,Q05193,Q6ZV85,Q59GN9,Q32Q67,Q6PEK6,A8K4X9,A8K1B6,A6NLM6,O00429,Q86VD2,O60313,Q8N1K8	1804	7	16659	6.59606	0.999788	0.100336	6.2011
SMART	SM00302:GED	4	0.210305	0.0158187	Q5SYX2,Q9UQ16,Q5SYX0,P50570,Q6P3T6,Q59GI5,Q9UPH5,Q6ZTU8,Q6ZSZ9,Q05193,Q6ZV85,Q59GN9,Q32Q67,A8K4X9,A8K1B6,A6NLM6,O00429,Q86VD2,Q8N1K8	909	6	9079	6.6586	0.990187	0.123761	19.1014
INTERPRO	IPR003130:Dynamin GTPase effector	4	0.210305	0.0196776	Q5SYX2,Q9UQ16,Q5SYX0,P50570,Q6P3T6,Q59GI5,Q9UPH5,Q6ZTU8,Q6ZSZ9,Q05193,Q6ZV85,Q59GN9,Q32Q67,A8K4X9,A8K1B6,A6NLM6,O00429,Q86VD2,Q8N1K8	1804	6	16659	6.15632	1	0.351504	29.3508
INTERPRO	IPR000375:Dynamin central region	4	0.210305	0.0196776	Q5SYX2,Q9UQ16,Q5SYX0,P50570,Q6P3T6,Q59GI5,Q9UPH5,Q6ZTU8,Q6ZSZ9,Q05193,Q6ZV85,Q59GN9,Q32Q67,A8K4X9,A8K1B6,A6NLM6,O00429,Q86VD2,Q8N1K8	1804	6	16659	6.15632	1	0.351504	29.3508
UP_SEQ_FEATURE	domain:GED	4	0.210305	0.0247288	Q5SYX2,Q9UQ16,Q5SYX0,P50570,Q6P3T6,Q59GI5,Q9UPH5,Q6ZTU8,Q6ZSZ9,Q05193,Q6ZV85,Q59GN9,Q32Q67,A8K4X9,A8K1B6,A6NLM6,O00429,Q86VD2,Q8N1K8	1886	7	19113	5.79094	1	0.613151	37.3961
PIR_SUPERFAMILY	PIRSF005109:dynamin, metazoan type	3	0.157729	0.0475197	Q5SYX2,Q9UQ16,Q5SYX0,P50570,Q6P3T6,Q59GI5,Q9UPH5,Q6ZTU8,Q6ZSZ9,Q05193,Q6ZV85,A8K1B6,A6NLM6,Q86VD2,Q8N1K8	976	3	7396	7.57787	1	0.895118	53.078
GOTERM_BP_FAT	GO:0070584~mitochondrion morphogenesis	4	0.210305	0.134049	Q59GN9,Q04837,Q567R6,Q32Q67,Q75MV9,A4D1U3,A8K4X9,Q6PEK6,O95140,A8K1B3,O00429,O60313	1611	11	13528	3.05355	1	0.695813	92.9616
Annotation Cluster 106	Enrichment Score: 2.1023880172406146
Category	Term	Count	%	PValue	Genes	List Total	Pop Hits	Pop Total	Fold Enrichment	Bonferroni	Benjamini	FDR
GOTERM_BP_FAT	GO:0010552~positive regulation of specific transcription from RNA polymerase II promoter	15	0.788644	0.00590722	P51531,Q96LD7,Q92769,Q2XN98,Q3LRW2,Q3LRW1,P84022,Q3LRW5,P51532,Q3LRW4,Q3LRW3,Q5W9G6,Q6P3S4,Q96T37,Q59F45,Q2XSC7,Q6IC76,P49715,A8K725,Q53QP1,Q1MSW8,Q6PQC8,Q6PQC7,Q53GA5,Q6PQC6,A8K4B6,P04637,Q3ZB86,Q6IT77,Q9UQL6,Q4V760,Q9HBD4,Q16594,Q1MSX0,Q86VW9,Q53SU9,Q5U0M2,P12956,Q19RW5,Q59FZ6,P78527,Q13547,Q5HYD4,Q59EY1,Q96AC5,A7LNP2,Q5U0E4,Q6FG54,Q05CA4,Q9UKS7,Q4FEW1,Q68DS8,Q6FG89,Q53YJ5,P14921,Q6N087,Q6IT96,…	1611	57	13528	2.20981	1	0.079538	10.3488
GOTERM_BP_FAT	GO:0043193~positive regulation of gene-specific transcription	20	1.05152	0.00600873	P51531,Q96LD7,Q92769,Q2XN98,Q3LRW2,Q3LRW1,P84022,Q12830,Q3LRW5,P51532,Q3LRW4,Q3LRW3,A8K763,Q53F64,Q5W9G6,Q6P3S4,Q96T37,Q59F45,Q2XSC7,Q6IC76,P49715,A8K725,Q53QP1,Q1MSW8,Q9H5E0,Q6PQC8,Q6PQC7,Q53GA5,Q6PQC6,A8K4B6,Q99729,P04637,Q3ZB86,Q6IT77,Q9UQL6,Q4V760,Q9HBD4,Q16594,Q1MSX0,Q86VW9,Q53SU9,Q5U0M2,Q19RW5,P12956,Q59FZ6,P78527,P62195,Q13547,Q5HYD4,Q59EY1,Q96AC5,A7LNP2,Q05CA4,Q5U0E4,Q6FG54,Q13263,Q53XR6,…	1611	87	13528	1.93041	1	0.0805616	10.5174
GOTERM_BP_FAT	GO:0010553~negative regulation of specific transcription from RNA polymerase II promoter	12	0.630915	0.00698029	P51531,Q86VW9,Q59EJ8,Q92769,Q86YY2,Q86YY1,O75376,Q59FZ6,P84022,P51532,Q13547,Q5HYD4,Q5W9G6,Q59EY1,Q9BZK7,Q96T37,Q59F45,Q59GM0,Q7Z516,Q6W2J9,Q9BT61,Q561W3,Q9Y618,Q56D06,Q68DS8,Q29RF6,Q92993,A8K4B6,Q6IT96,Q9NSZ0,Q3ZB86,A7E2E1,Q9UQL6,Q4V760,Q9HBD4	1611	41	13528	2.45774	1	0.089497	12.1165
GOTERM_BP_FAT	GO:0032583~regulation of gene-specific transcription	27	1.41956	0.00785053	P51531,Q59EJ8,Q96LD7,Q92769,Q2XN98,Q3LRW2,Q3LRW1,P84022,Q12830,Q3LRW5,P51532,Q3LRW4,Q3LRW3,A8K763,Q53F64,Q6P3S4,Q5W9G6,Q96T37,Q59F45,Q6IC76,Q2XSC7,Q59GM0,P49715,A8K725,Q561W3,Q53QP1,Q6W2J9,Q9BT61,Q56D06,Q1MSW8,Q9H5E0,Q5VTR2,Q6PQC8,Q6PQC7,Q6PQC6,Q53GA5,A8K4B6,Q99729,P04637,Q3ZB86,Q6IT77,Q9UQL6,Q4V760,Q16594,Q9HBD4,Q1MSX0,Q86VW9,Q53SU9,Q5U0M2,P12956,Q86YY2,Q19RW5,Q86YY1,O75376,Q59FZ6,P78527,P62195,…	1611	134	13528	1.69199	1	0.0984405	13.5257
GOTERM_BP_FAT	GO:0032582~negative regulation of gene-specific transcription	13	0.683491	0.00900939	P51531,Q86VW9,Q59EJ8,Q92769,Q86YY2,O75376,Q86YY1,Q59FZ6,P84022,P51532,Q13547,Q5HYD4,Q5W9G6,Q59EY1,Q96T37,Q9BZK7,Q59F45,O75381,Q59GM0,Q7Z516,Q6W2J9,Q9BT61,Q561W3,Q9Y618,Q56D06,Q68DS8,Q29RF6,Q92993,A8K4B6,Q6IT96,Q9NSZ0,Q3ZB86,A7E2E1,Q9UQL6,Q4V760,Q9HBD4	1611	48	13528	2.27426	1	0.110353	15.3693
GOTERM_BP_FAT	GO:0010551~regulation of specific transcription from RNA polymerase II promoter	20	1.05152	0.0138688	P51531,Q59EJ8,Q96LD7,Q92769,Q2XN98,Q3LRW2,Q3LRW1,P84022,Q3LRW5,P51532,Q3LRW4,Q3LRW3,Q5W9G6,Q6P3S4,Q96T37,Q59F45,Q2XSC7,Q6IC76,Q59GM0,P49715,A8K725,Q6W2J9,Q9BT61,Q53QP1,Q561W3,Q56D06,Q1MSW8,Q6PQC8,Q6PQC7,Q53GA5,Q6PQC6,A8K4B6,P04637,Q3ZB86,Q6IT77,Q9UQL6,Q4V760,Q9HBD4,Q16594,Q1MSX0,Q86VW9,Q53SU9,Q5U0M2,Q86YY2,Q19RW5,P12956,Q86YY1,O75376,Q59FZ6,P78527,Q13547,Q5HYD4,Q59EY1,Q9BZK7,Q96AC5,A7LNP2,Q05CA4,…	1611	94	13528	1.78665	1	0.157606	22.7026
Annotation Cluster 107	Enrichment Score: 2.0689197638600536
Category	Term	Count	%	PValue	Genes	List Total	Pop Hits	Pop Total	Fold Enrichment	Bonferroni	Benjamini	FDR
UP_SEQ_FEATURE	site:Important for catalytic activity	7	0.368034	0.000499044	A8K512,Q53T69,P42126,Q9UQC5,Q13011,Q53TA2,Q96DC0,A8K6Y3,Q8WY59,Q4W5B4,Q9NUV1,Q96KP4,P30084,A8K745,P40939,Q9NW02,Q58EZ5,Q16836,Q08426	1886	12	19113	5.91159	0.880025	0.039958	0.9293
INTERPRO	IPR013328:Dehydrogenase, multihelical	6	0.315457	0.0012791	Q53T69,Q9NY20,Q9UQC5,Q53TA2,O60701,Q49A26,A8K6Y3,Q9NQ83,Q9NQ82,Q9NQ81,Q4W5B4,P52209,P40939,Q58EZ5,Q16836,Q08426	1804	9	16659	6.15632	0.948005	0.0438086	2.21276
GOTERM_MF_FAT	GO:0004300~enoyl-CoA hydratase activity	5	0.262881	0.00277179	A8K6Y3,Q53T69,Q9UQC5,P30084,A8K745,P55084,P40939,Q13011,Q53TA2,Q9T2V8,Q58EZ5,Q08426	1596	6	12983	6.77893	0.969972	0.0468875	4.4154
GOTERM_MF_FAT	GO:0003857~3-hydroxyacyl-CoA dehydrogenase activity	5	0.262881	0.00277179	P51659,Q53T69,Q9UQC5,Q53TA2,Q9UBA4,A8K6Y3,Q4W5B4,P40939,P55084,Q59H27,Q9T2V8,Q58EZ5,Q16836,Q08426	1596	6	12983	6.77893	0.969972	0.0468875	4.4154
KEGG_PATHWAY	hsa00062:Fatty acid elongation in mitochondria	5	0.262881	0.0258317	Q53T69,Q4W5B4,P42765,Q9UQC5,P30084,P55084,P40939,Q53TA2,Q9T2V8,Q16836	808	8	5085	3.93332	0.988613	0.147712	27.3561
INTERPRO	IPR006108:3-hydroxyacyl-CoA dehydrogenase, C-terminal	3	0.157729	0.0605307	A8K6Y3,Q53T69,Q4W5B4,Q9UQC5,P40939,Q53TA2,Q16836,Q58EZ5,Q08426	1804	4	16659	6.92586	1	0.673104	66.4323
INTERPRO	IPR006176:3-hydroxyacyl-CoA dehydrogenase, NAD binding	3	0.157729	0.0605307	A8K6Y3,Q53T69,Q4W5B4,Q9UQC5,P40939,Q53TA2,Q16836,Q58EZ5,Q08426	1804	4	16659	6.92586	1	0.673104	66.4323
INTERPRO	IPR006180:3-hydroxyacyl-CoA dehydrogenase, conserved site	3	0.157729	0.0605307	A8K6Y3,Q53T69,Q4W5B4,Q9UQC5,P40939,Q53TA2,Q16836,Q58EZ5,Q08426	1804	4	16659	6.92586	1	0.673104	66.4323
Annotation Cluster 108	Enrichment Score: 2.052490010172802
Category	Term	Count	%	PValue	Genes	List Total	Pop Hits	Pop Total	Fold Enrichment	Bonferroni	Benjamini	FDR
GOTERM_BP_FAT	GO:0048255~mRNA stabilization	7	0.368034	0.00542691	A8K9J2,Q9UEL2,Q96BA7,Q05CK9,Q08211,Q58F26,Q6PKI6,Q9Y2T7,Q05CI5,Q05D43,Q00839,O60506,Q7KZ24,Q9UCE8,Q6PJK6,Q32Q22,Q5RI19,Q5RI18,P11940,Q5RI17,P67809,Q12771,Q14103,Q12803,Q59GL1,Q5TCG3,Q5TCG1,Q7Z4Q5	1611	15	13528	3.91873	1	0.0741014	9.54673
GOTERM_BP_FAT	GO:0043489~RNA stabilization	7	0.368034	0.00542691	A8K9J2,Q9UEL2,Q96BA7,Q05CK9,Q08211,Q58F26,Q6PKI6,Q9Y2T7,Q05CI5,Q05D43,Q00839,O60506,Q7KZ24,Q9UCE8,Q6PJK6,Q32Q22,Q5RI19,Q5RI18,P11940,Q5RI17,P67809,Q12771,Q14103,Q12803,Q59GL1,Q5TCG3,Q5TCG1,Q7Z4Q5	1611	15	13528	3.91873	1	0.0741014	9.54673
GOTERM_BP_FAT	GO:0043488~regulation of mRNA stability	8	0.42061	0.0112913	Q5VU20,A8K9J2,Q9UEL2,Q5VU21,Q5VU22,Q63HR1,Q96BA7,Q05CK9,Q08211,Q58F26,Q6PKI6,Q9Y2T7,Q05CI5,Q05D43,Q00839,O60506,Q7KZ24,Q5VU19,Q9UCE8,Q6PJK6,Q32Q22,Q5RI19,Q5RI18,P11940,Q5RI17,Q12771,P67809,Q14103,Q12803,Q59GL1,Q5TCG3,Q5TCG1,Q7Z4Q5,Q8NC51	1611	22	13528	3.05355	1	0.132198	18.8913
GOTERM_BP_FAT	GO:0043487~regulation of RNA stability	8	0.42061	0.0185435	Q5VU20,A8K9J2,Q9UEL2,Q5VU21,Q5VU22,Q63HR1,Q96BA7,Q05CK9,Q08211,Q58F26,Q6PKI6,Q9Y2T7,Q05CI5,Q05D43,Q00839,O60506,Q7KZ24,Q5VU19,Q9UCE8,Q6PJK6,Q32Q22,Q5RI19,Q5RI18,P11940,Q5RI17,Q12771,P67809,Q14103,Q12803,Q59GL1,Q5TCG3,Q5TCG1,Q7Z4Q5,Q8NC51	1611	24	13528	2.79909	1	0.196693	29.1868
Annotation Cluster 109	Enrichment Score: 2.0518214813506677
Category	Term	Count	%	PValue	Genes	List Total	Pop Hits	Pop Total	Fold Enrichment	Bonferroni	Benjamini	FDR
SP_PIR_KEYWORDS	Rotamase	13	0.683491	0.000142213	Q3MHV0,A8K534,Q02790,Q53GD8,P62942,P30405,Q9UH88,Q8NFL2,Q567Q0,Q13356,Q00688,Q71V99,A8K220,Q7Z349,Q5VVH2,P49792,Q13526,Q5W0X3,Q13073,Q3V793,Q0D2H3,Q5HYW6,Q6IBH5,Q6IRW4,Q5HYW4,Q5TAN3,Q86YK6,P62937,Q9Y237,Q5JC46,P23284,Q14318,Q5JC45,Q1JUQ5,Q53GU3,Q52M21,Q1JUQ3,A8K4V9,Q0VDC5,Q2YDB7,Q0VDC6	1895	37	19235	3.56636	0.0862238	0.00106026	0.211413
GOTERM_MF_FAT	GO:0016859~cis-trans isomerase activity	14	0.736067	0.000510266	Q3MHV0,A8K534,Q02790,Q53GD8,P62942,P30405,Q9UH88,Q8NFL2,Q567Q0,Q13356,Q00688,Q71V99,A8K220,Q7Z349,Q5VVH2,P49792,Q13526,O43708,Q5W0X3,A6NED0,Q13073,Q3V793,Q0D2H3,Q5HYW6,Q6IBH5,Q6IRW4,Q5HYW4,Q5TAN3,Q86YK6,P62937,Q9Y237,Q5JC46,P23284,Q14318,Q5JC45,Q1JUQ5,Q53GU3,Q52M21,Q1JUQ3,A8K4V9,Q0VDC5,Q0VDC6,Q2YDB7	1596	39	12983	2.92015	0.475144	0.0103434	0.826957
GOTERM_MF_FAT	GO:0003755~peptidyl-prolyl cis-trans isomerase activity	13	0.683491	0.00109623	Q3MHV0,A8K534,Q02790,Q53GD8,P62942,P30405,Q9UH88,Q8NFL2,Q567Q0,Q13356,Q00688,Q71V99,A8K220,Q7Z349,Q5VVH2,P49792,Q13526,Q5W0X3,Q13073,Q3V793,Q0D2H3,Q5HYW6,Q6IBH5,Q6IRW4,Q5HYW4,Q5TAN3,Q86YK6,P62937,Q9Y237,Q5JC46,P23284,Q14318,Q5JC45,Q1JUQ5,Q53GU3,Q52M21,Q1JUQ3,A8K4V9,Q0VDC5,Q2YDB7,Q0VDC6	1596	37	12983	2.85814	0.749752	0.0210868	1.76868
INTERPRO	IPR001179:Peptidyl-prolyl cis-trans isomerase, FKBP-type	6	0.315457	0.0574756	Q3V793,Q02790,Q53GD8,P62942,Q9UH88,Q00688,Q86YK6,Q7Z349,Q14318,Q1JUQ5,Q5VVH2,Q53GU3,Q1JUQ3,Q5W0X3,Q0VDC5,Q5T1M5,Q0VDC6	1804	20	16659	2.77034	1	0.659271	64.4719
INTERPRO	IPR002130:Peptidyl-prolyl cis-trans isomerase, cyclophilin-type	6	0.315457	0.0689739	Q13073,A8K534,P30405,Q6IBH5,Q567Q0,Q13356,Q5TAN3,Q71V99,P62937,A8K220,Q5JC46,P23284,Q5JC45,P49792,Q2YDB7	1804	21	16659	2.63842	1	0.713693	71.3333
UP_SEQ_FEATURE	domain:PPIase cyclophilin-type	5	0.262881	0.0942872	Q13073,A8K534,P30405,Q6IBH5,Q567Q0,Q13356,Q71V99,P62937,A8K220,Q5JC46,Q5JC45,P49792,P23284,Q2YDB7	1886	18	19113	2.81504	1	0.950458	84.3126
SP_PIR_KEYWORDS	Cyclosporin	3	0.157729	0.145878	P62937,Q71V99,A8K220,A8K534,P23284,P30405,Q6IBH5,Q2YDB7,Q567Q0	1895	7	19235	4.35017	1	0.399534	90.4286
Annotation Cluster 110	Enrichment Score: 2.048479280937711
Category	Term	Count	%	PValue	Genes	List Total	Pop Hits	Pop Total	Fold Enrichment	Bonferroni	Benjamini	FDR
INTERPRO	IPR000089:Biotin/lipoyl attachment	6	0.315457	0.0012791	Q6IBS5,Q86SW4,P11498,Q5VVL7,Q7LDY7,P10515,P11182,Q53EP3,Q16187,Q13085,Q01991,Q86YI5,Q86TW7,Q59FY4,Q9HAN0,Q16791,O00330,Q86TQ8,P36957,Q5VVL8,Q6LEQ7,Q7Z5W8	1804	9	16659	6.15632	0.948005	0.0438086	2.21276
INTERPRO	IPR001078:2-oxoacid dehydrogenase acyltransferase, catalytic domain	4	0.210305	0.00465315	Q86SW4,Q6IBS5,Q5VVL7,Q7LDY7,P10515,P11182,Q53EP3,Q16187,Q01991,Q86YI5,Q86TW7,Q9HAN0,Q16791,O00330,Q86TQ8,P36957,Q5VVL8,Q6LEQ7	1804	4	16659	9.23448	0.999979	0.123123	7.83025
GOTERM_MF_FAT	GO:0031405~lipoic acid binding	5	0.262881	0.00583899	Q86SW4,Q6IBS5,Q5VVL7,Q7LDY7,P10515,P11182,Q53EP3,P09622,Q16187,Q01991,Q86YI5,Q86TW7,Q9HAN0,Q16791,O00330,Q86TQ8,P36957,Q5VVL8,Q6LEQ7	1596	7	12983	5.81051	0.999386	0.0883082	9.08785
SP_PIR_KEYWORDS	lipoyl	4	0.210305	0.00818251	Q86SW4,Q6IBS5,Q5VVL7,Q7LDY7,P10515,P11182,Q53EP3,Q16187,Q01991,Q86YI5,Q86TW7,Q9HAN0,Q16791,O00330,Q86TQ8,P36957,Q5VVL8,Q6LEQ7	1895	5	19235	8.12032	0.994533	0.0408161	11.5083
PIR_SUPERFAMILY	PIRSF000432:dihydrolipoamide acetyltransferase	4	0.210305	0.00823827	Q86SW4,Q6IBS5,Q5VVL7,Q7LDY7,P10515,P11182,Q53EP3,Q16187,Q01991,Q86YI5,Q86TW7,Q9HAN0,Q16791,O00330,Q86TQ8,P36957,Q5VVL8,Q6LEQ7	976	4	7396	7.57787	0.999311	0.484074	12.0649
INTERPRO	IPR003016:2-oxo acid dehydrogenase, lipoyl-binding site	4	0.210305	0.0196776	Q86SW4,Q6IBS5,Q5VVL7,Q7LDY7,P10515,P11182,Q53EP3,Q16187,Q01991,Q86YI5,Q86TW7,Q9HAN0,Q16791,O00330,Q86TQ8,P36957,Q5VVL8,Q6LEQ7	1804	6	16659	6.15632	1	0.351504	29.3508
UP_SEQ_FEATURE	domain:Lipoyl-binding	3	0.157729	0.0272503	Q6IBS5,Q86SW4,Q16187,Q5VVL7,Q7LDY7,Q86TW7,P11182,O00330,Q86TQ8,P36957,Q5VVL8,Q6LEQ7	1886	3	19113	10.1341	1	0.642823	40.3552
INTERPRO	IPR004167:E3 binding	3	0.157729	0.0325919	Q5VVL7,Q86YI5,Q01991,Q9HAN0,P10515,P11182,Q16791,Q53EP3,O00330,Q5VVL8	1804	3	16659	9.23448	1	0.486024	43.9697
Annotation Cluster 111	Enrichment Score: 2.041146897415518
Category	Term	Count	%	PValue	Genes	List Total	Pop Hits	Pop Total	Fold Enrichment	Bonferroni	Benjamini	FDR
PIR_SUPERFAMILY	PIRSF002053:nonhistone chromosomal protein HMG-17	4	0.210305	0.00823827	Q5HYD3,P05114,Q15651,Q6NSG7,P05204,O00479,Q3B790	976	4	7396	7.57787	0.999311	0.484074	12.0649
SMART	SM00527:HMG17	4	0.210305	0.00854126	Q5HYD3,P05114,Q15651,Q6NSG7,P05204,O00479,Q3B790	909	5	9079	7.99032	0.916891	0.0795754	10.7773
INTERPRO	IPR000079:High mobility group protein HMG14 and HMG17	4	0.210305	0.0106955	Q5HYD3,P05114,Q15651,Q6NSG7,P05204,O00479,Q3B790	1804	5	16659	7.38758	1	0.23222	17.1377
Annotation Cluster 112	Enrichment Score: 2.030549000635408
Category	Term	Count	%	PValue	Genes	List Total	Pop Hits	Pop Total	Fold Enrichment	Bonferroni	Benjamini	FDR
INTERPRO	IPR018103:Translationally controlled tumour protein, conserved site	4	0.210305	0.00465315	P13693,Q8IWJ0,Q5H962,Q86YH5,Q9HAU6,Q56UQ5,Q7Z6Z7,Q5W0H4,Q8TBK7,Q5H924	1804	4	16659	9.23448	0.999979	0.123123	7.83025
INTERPRO	IPR001983:Translationally controlled tumour-associated TCTP	4	0.210305	0.00465315	P13693,Q8IWJ0,Q5H962,Q86YH5,Q9HAU6,Q56UQ5,Q7Z6Z7,Q5W0H4,Q8TBK7,Q5H924	1804	4	16659	9.23448	0.999979	0.123123	7.83025
INTERPRO	IPR011323:Mss4/translationally controlled tumour-associated TCTP	4	0.210305	0.0106955	P13693,Q8IWJ0,Q5H962,Q86YH5,Q9HAU6,Q56UQ5,Q7Z6Z7,Q5W0H4,Q8TBK7,Q5H924	1804	5	16659	7.38758	1	0.23222	17.1377
INTERPRO	IPR018105:Translationally controlled tumour protein	3	0.157729	0.0325919	P13693,Q86YH5,Q9HAU6,Q56UQ5,Q5W0H4,Q8TBK7	1804	3	16659	9.23448	1	0.486024	43.9697
Annotation Cluster 113	Enrichment Score: 2.021880438575788
Category	Term	Count	%	PValue	Genes	List Total	Pop Hits	Pop Total	Fold Enrichment	Bonferroni	Benjamini	FDR
SP_PIR_KEYWORDS	mitochondrion inner membrane	47	2.47108	1.04088e-08	Q8N5H5,Q0QF12,O75964,Q5H9R2,Q53GB3,Q6FGA0,Q5T952,P03928,Q9NRK6,Q6PEK6,P18859,Q53GR7,Q02978,Q59EI9,Q705K4,Q8TAS0,Q8NCF7,P13073,Q96F77,Q96KF9,O60313,Q8WXQ4,Q6P1Q8,Q9P1A0,Q3SY17,Q6FHJ9,P43155,P53007,Q08ET0,Q0QEN7,Q6I9V5,P31040,P35232,Q6I9V2,A8K5J6,Q9P129,Q53YB7,Q05DN3,Q9UJS0,A8K8E8,Q53HC3,Q5T331,P14927,Q6IBH0,Q85BD0,P12236,Q6FGD1,Q9HD23,Q8WU60,Q7GY08,P12235,P06576,Q6NZ59,Q6FHP5,P31930,Q3B7X4,Q59EP7,…	1895	193	19235	2.47186	6.59914e-06	1.40408e-07	1.54889e-05
GOTERM_BP_FAT	GO:0009259~ribonucleotide metabolic process	40	2.10305	8.56088e-07	A8K516,O75351,O75964,P12268,Q53GB3,P49915,Q53SW9,Q32Q12,P03928,P53396,P18859,Q53GR7,Q01433,A8K4H7,Q8TAS0,Q9HC01,Q8NCK6,Q52M77,Q9UGJ0,Q96F77,Q59HH3,Q8WXQ4,Q9Y487,Q9P1A0,Q53S28,A8K639,Q6LCT6,Q08ET0,Q6FGK3,P04075,A8MWG9,Q5U0M9,Q6PIW4,P16615,Q5T695,Q0QEN7,Q5T694,Q5T693,P30566,A8K5J1,A8K945,P22392,Q6I9V2,P22102,P00813,Q9UJS0,Q85BD0,P31939,Q8N9C4,Q7GY08,A8MWA3,P06576,Q6NZ59,Q6NUM0,A8K026,P60891,Q8TBM3,…	1611	147	13528	2.28497	0.00318044	3.06294e-05	0.00157849
GOTERM_CC_FAT	GO:0045259~proton-transporting ATP synthase complex	12	0.630915	4.21511e-06	A8KA31,A8K4X0,O75964,Q85KT5,Q08ET0,Q53GB3,Q5QNZ2,Q0QEN7,P03928,Q99766,Q6I9V2,P18859,A8K1U3,P36542,A0PJH2,Q9BSL9,A8K0K3,Q6IB54,Q8TAS0,Q85BD0,Q9UII2,P56381,Q7GY08,Q5JXL8,P24539,P06576,Q6NZ59,Q53HH2,P48047,Q96F77,P25705,Q6IAQ7,O75947,Q8WXQ4	1438	21	12782	5.07928	0.0027571	4.67939e-05	0.00629991
GOTERM_BP_FAT	GO:0009260~ribonucleotide biosynthetic process	34	1.78759	5.4249e-06	O75964,P12268,Q53GB3,P49915,Q32Q12,P03928,P18859,Q53GR7,Q01433,A8K4H7,Q8TAS0,Q9HC01,Q8NCK6,Q52M77,Q9UGJ0,Q96F77,Q59HH3,Q8WXQ4,Q9Y487,Q53S28,A8K639,Q6LCT6,Q08ET0,Q6FGK3,P04075,Q5U0M9,A8MWG9,P16615,Q5T695,Q0QEN7,Q5T694,Q5T693,P30566,A8K5J1,A8K945,P22392,Q6I9V2,P22102,P00813,Q9UJS0,Q85BD0,P31939,Q7GY08,A8MWA3,P06576,Q6NZ59,Q6NUM0,A8K026,P60891,Q8TBM3,Q6FI10,O00746,P17812,Q3B7A7,Q546F9,Q85KT5,Q5QNZ2,…	1611	124	13528	2.30248	0.0199837	0.000164101	0.0100023
GOTERM_CC_FAT	GO:0005753~mitochondrial proton-transporting ATP synthase complex	11	0.578339	1.10918e-05	A8KA31,A8K4X0,O75964,Q85KT5,Q08ET0,Q53GB3,Q5QNZ2,Q0QEN7,P03928,Q6I9V2,P18859,P36542,A0PJH2,A8K0K3,Q9BSL9,Q6IB54,Q8TAS0,Q85BD0,Q9UII2,P56381,Q7GY08,Q5JXL8,P24539,P06576,Q6NZ59,Q53HH2,P48047,P25705,Q6IAQ7,O75947	1438	19	12782	5.14611	0.00723883	0.000111765	0.016577
GOTERM_BP_FAT	GO:0034404~nucleobase, nucleoside and nucleotide biosynthetic process	45	2.36593	1.37667e-05	O75964,P12268,P07741,Q53GB3,P49915,Q32Q12,P03928,P18859,Q53GR7,Q01433,Q6VBB7,A8K4H7,Q8TAS0,Q9HC01,Q8NCK6,Q52M77,P48163,Q9UGJ0,P23921,Q53GS1,Q53F55,Q96F77,Q59HH3,Q8WXQ4,Q9Y487,Q53S28,A8K639,Q6LCT6,Q6FGK3,Q08ET0,P04075,A8MWG9,Q5U0M9,P16615,Q5T695,Q0QEN7,Q5T694,Q5T693,Q0ZAI9,P30566,A8K5J1,A8K945,P22392,P00491,Q6I9V2,P22102,P00813,Q9UJS0,Q85BD0,Q14558,Q53GZ5,P31939,Q7GY08,A8MWA3,P06576,Q6NZ59,Q6NUM0,…	1611	193	13528	1.95791	0.0499363	0.000371136	0.0253808
GOTERM_BP_FAT	GO:0034654~nucleobase, nucleoside, nucleotide and nucleic acid biosynthetic process	45	2.36593	1.37667e-05	O75964,P12268,P07741,Q53GB3,P49915,Q32Q12,P03928,P18859,Q53GR7,Q01433,Q6VBB7,A8K4H7,Q8TAS0,Q9HC01,Q8NCK6,Q52M77,P48163,Q9UGJ0,P23921,Q53GS1,Q53F55,Q96F77,Q59HH3,Q8WXQ4,Q9Y487,Q53S28,A8K639,Q6LCT6,Q6FGK3,Q08ET0,P04075,A8MWG9,Q5U0M9,P16615,Q5T695,Q0QEN7,Q5T694,Q5T693,Q0ZAI9,P30566,A8K5J1,A8K945,P22392,P00491,Q6I9V2,P22102,P00813,Q9UJS0,Q85BD0,Q14558,Q53GZ5,P31939,Q7GY08,A8MWA3,P06576,Q6NZ59,Q6NUM0,…	1611	193	13528	1.95791	0.0499363	0.000371136	0.0253808
GOTERM_BP_FAT	GO:0009150~purine ribonucleotide metabolic process	35	1.84017	2.36182e-05	O75351,O75964,P12268,Q53GB3,P49915,Q53SW9,Q32Q12,P03928,P53396,P18859,Q53GR7,Q01433,A8K4H7,Q8TAS0,Q9HC01,Q8NCK6,Q52M77,Q9UGJ0,Q96F77,Q59HH3,Q8WXQ4,Q9Y487,Q9P1A0,Q53S28,A8K639,Q6LCT6,Q08ET0,Q6FGK3,P04075,Q5U0M9,Q6PIW4,P16615,Q5T695,Q0QEN7,Q5T694,Q5T693,P30566,A8K945,P22392,Q6I9V2,P22102,P00813,Q9UJS0,Q85BD0,Q8N9C4,P31939,Q7GY08,A8MWA3,P06576,Q6NZ59,Q6NUM0,A8K026,P60891,Q8TBM3,Q6FI10,O00746,Q3B7A7,…	1611	138	13528	2.12974	0.0841333	0.000597674	0.0435396
GOTERM_BP_FAT	GO:0009165~nucleotide biosynthetic process	43	2.26078	2.72881e-05	O75964,P12268,Q53GB3,P49915,Q32Q12,P03928,P18859,Q53GR7,Q01433,Q6VBB7,A8K4H7,Q8TAS0,Q9HC01,Q8NCK6,Q52M77,P48163,Q9UGJ0,P23921,Q53GS1,Q53F55,Q96F77,Q59HH3,Q8WXQ4,Q9Y487,Q53S28,A8K639,Q6LCT6,Q6FGK3,Q08ET0,P04075,A8MWG9,Q5U0M9,P16615,Q5T695,Q0QEN7,Q5T694,Q5T693,Q0ZAI9,P30566,A8K5J1,A8K945,P22392,P00491,Q6I9V2,P22102,P00813,Q9UJS0,Q85BD0,Q14558,Q53GZ5,P31939,Q7GY08,A8MWA3,P06576,Q6NZ59,Q6NUM0,A8K026,…	1611	186	13528	1.9413	0.0965552	0.000676706	0.0503032
GOTERM_BP_FAT	GO:0044271~nitrogen compound biosynthetic process	64	3.36488	5.5612e-05	P00367,A8K511,O75964,Q8N9J5,P31153,Q53GB3,P07741,P12268,P49915,Q9NZB8,Q32Q12,P61457,P03928,Q68Y91,Q6P3S4,P18859,Q01433,Q53GR7,P15559,Q8IYQ7,Q6VBB7,P49715,A8K4H7,Q5T6L5,Q5T6L4,Q9HC01,Q8TAS0,Q8NCK6,Q9Y4T0,Q6FGB3,P48163,Q52M77,Q9UGJ0,P23921,Q7Z503,Q53F55,Q53GS1,Q96F77,Q59HH3,Q8WXQ4,Q9Y487,Q5T6L6,Q5T7G6,Q53S28,A8K639,Q5T7G5,Q6LCT6,Q08ET0,Q6FGK3,P04075,Q9H0N5,Q5U0M9,A8MWG9,P16615,Q5T695,Q5T694,Q0QEN7,…	1611	325	13528	1.65362	0.18693	0.00129253	0.102491
GOTERM_BP_FAT	GO:0009152~purine ribonucleotide biosynthetic process	30	1.57729	8.14694e-05	Q3B7A7,Q546F9,O75964,Q85KT5,Q53GB3,P12268,P49915,Q5QNZ2,Q32Q12,P03928,Q71UA4,P18859,Q15374,Q01433,Q53GR7,P36542,A8K0K3,A8K4H7,Q75M55,Q53F90,Q8TAS0,Q9HC01,Q8NCK6,Q52M77,Q9UGJ0,P56381,Q68CQ5,P24539,Q96F77,Q59HH3,Q8WXQ4,Q75KX8,Q9Y487,Q6FHN3,A8KA31,Q53S28,A8K4X0,A8K639,Q6LCT6,Q9UIJ7,Q6FGK3,Q08ET0,A8KA32,P04075,Q5U0M9,Q53FW2,Q5T695,Q9UCN2,P16615,Q0QEN7,Q5T694,P30566,Q5T693,A8K945,P22392,Q99766,P22102,…	1611	117	13528	2.15315	0.261519	0.00179224	0.150111
SP_PIR_KEYWORDS	atp synthesis	8	0.42061	8.91527e-05	A8KA31,A8K4X0,O75964,Q85KT5,Q8TAS0,Q85BD0,Q0QEN7,P56381,Q7GY08,P06576,P03928,Q99766,Q6I9V2,Q53HH2,P48047,P25705,Q96F77,P36542,A8K1U3,Q8WXQ4,A8K0K3	1895	13	19235	6.2464	0.0549575	0.000724421	0.132583
GOTERM_CC_FAT	GO:0044455~mitochondrial membrane part	30	1.57729	0.000103499	O14561,Q0QF12,Q8N5H5,O75964,Q85KT5,Q8IXI2,Q5H9R2,Q53GB3,Q6FGA0,Q5QNZ2,P03928,Q6PEK6,P18859,P36542,Q59EI9,A8K0K3,Q13423,Q8TAS0,Q9H9P8,A8K1B3,Q9UII2,P56381,Q5JXL8,P24539,Q2TB59,O95298,Q8N4H5,P28331,Q6IAQ7,O14548,O60313,A6NFV0,Q9P1A0,A8KA31,A8K4X0,Q549M5,O95140,Q08ET0,Q0QEN7,Q8IW48,Q6I9V5,P31040,Q6I9V2,A8K5J6,A0PJH2,Q9BSL9,Q16891,Q05DN3,Q6IB54,O94826,P14927,Q85BD0,P12236,Q59GW8,Q567R0,Q6FGD1,Q8WU60,…	1438	125	12782	2.1333	0.065548	0.000954404	0.154582
GOTERM_BP_FAT	GO:0009141~nucleoside triphosphate metabolic process	30	1.57729	0.000639739	P17812,Q546F9,P33316,O75964,O75351,Q85KT5,Q9BVK7,Q53GB3,Q5QNZ2,Q32Q12,Q53SW9,P03928,P53396,P18859,Q53GR7,P36542,A8K0K3,Q75M55,Q8TAS0,Q9HC01,Q8NCK6,P78533,P56381,Q9UGJ0,P24539,Q6FGU2,Q53F55,P23919,P28331,Q96F77,Q6FHN1,Q75KX8,Q8WXQ4,Q9Y487,Q9P1A0,Q6FHN3,A8KA31,A8K4X0,Q6LCT6,Q9UIJ7,Q6FGK3,Q08ET0,P04075,Q5U0M9,Q69HW4,P16615,Q9UCN2,Q6PIW4,Q0QEN7,P22392,Q99766,Q6I9V2,A8K1U3,Q13733,A0PJH2,Q53SQ6,P00813,…	1611	131	13528	1.92304	0.907563	0.0119544	1.17303
SP_PIR_KEYWORDS	ATP biosynthesis	6	0.315457	0.000825971	A8KA31,A8K4X0,Q504U3,P30613,Q85KT5,Q8TAS0,Q85BD0,Q0QEN7,Q7GY08,P06576,P03928,Q16715,Q6I9V2,Q9UKK4,Q9UK31,Q16716,P25705,P14618,Q9NYI7,A6NFK3,P36542,Q8WUW7	1895	9	19235	6.76693	0.407783	0.00512293	1.22208
[truncated: 3,494 more rows]
