# Supplementary material for: The biology of lysine acetylation integrates transcriptional programming and metabolism
Source: Nutr Metab (Lond). 2011 Mar 3;8:12. doi: 10.1186/1743-7075-8-12 (PMC3060110; doi:10.1186/1743-7075-8-12)
Supplement: Additional file 2 — Lysine-acetylated proteins involved in different forms of cancers. The list of proteins includes heat-shock family members, kinases and transcription factors. [file 1743-7075-8-12-S2.XLS]

## Sheet: Human Cancers
Supplemental Table 2
Pancreatic cancer	Protein Name
Q53HJ9, Q59EH6, Q9UPJ7, Q9UPJ8, Q6FI20, O15530, Q9BRD5	3-phosphoinositide dependent protein kinase-1
Q6FH21, Q92934	BCL2-associated agonist of cell death
Q4LE28, Q92793, Q75MY6, Q4G0V0	CREB binding protein
Q7Z6C1, Q09472, Q38HM2	E1A binding protein p300
A8K7C6, O75100, P24941	cyclin-dependent kinase 2
P09211	glutathione S-transferase pi 1
Q6ICN0, P62993	growth factor receptor-bound protein 2
Q8TBA7, Q86SX1, Q86U12, Q96HX7, Q14568, P07900, Q2VPJ6, A8K500	heat shock protein 90kDa alpha (cytosolic), class A member 2; heat shock protein 90kDa alpha (cytosolic), class A member 1
Q6PK50, Q9H6X9, P08238	heat shock protein 90kDa alpha (cytosolic), class B member 1
P08069, Q9UCC0	insulin-like growth factor 1 receptor
Q3ZCU4, Q9UJU2, Q659G9, Q8IZI3	lymphoid enhancer-binding factor 1
Q4LE76, Q96QW8, P42345	mechanistic target of rapamycin (serine/threonine kinase)
P60484	phosphatase and tensin homolog; phosphatase and tensin homolog pseudogene 1
P27986	phosphoinositide-3-kinase, regulatory subunit 1 (alpha)
Q7Z5Q6, A8K5E3, Q6LE82, Q6LE77, Q7Z7J0, Q6LE81, Q6LE65, P06400, Q86WG4, Q59HH0, Q6DUF0, P78495, Q6LE80, Q7KZ61, Q7KZ60, Q6LE79	retinoblastoma 1
Q3LRW1, Q19RW5, Q6IT77, Q53GA5, Q5U0E4, Q4FEW1, P04637, Q3LRW4, Q1MSX0, Q2XN98, Q0PKT5, Q3LRW5, Q1MSW8, Q3LRW3, Q2XSC7, Q3LRW2	tumor protein p53
P15056, A4D1T4, Q75MQ8	v-raf murine sarcoma viral oncogene homolog B1
Q2TAM5, Q04206, Q6GTV1	v-rel reticuloendotheliosis viral oncogene homolog A (avian)
Endometrial Cancer
Q9BRD5, Q9UPJ7, Q53HJ9, Q59EH6, Q9UPJ8, O15530, Q6FI20	3-phosphoinositide dependent protein kinase-1
Q6FH21, Q92934	BCL2-associated agonist of cell death
P35221, Q8N1C0	catenin (cadherin-associated protein), alpha 1, 102kDa
Q49AD3, P26232, Q7Z3L1	catenin (cadherin-associated protein), alpha 2
P62993, Q6ICN0	growth factor receptor-bound protein 2
Q9UJU2, Q659G9, Q3ZCU4, Q8IZI3	lymphoid enhancer-binding factor 1
P60484	phosphatase and tensin homolog; phosphatase and tensin homolog pseudogene 1
P27986	phosphoinositide-3-kinase, regulatory subunit 1 (alpha)
Q2XSC7, Q3LRW4, Q3LRW5, P04637, Q3LRW2, Q3LRW3, Q53GA5, Q3LRW1, Q0PKT5, Q19RW5, Q6IT77, Q1MSW8, Q4FEW1, Q2XN98, Q5U0E4, Q1MSX0	tumor protein p53
P01106, Q6LBK7	v-myc myelocytomatosis viral oncogene homolog (avian)
P15056, A4D1T4, Q75MQ8	v-raf murine sarcoma viral oncogene homolog B1
Glioma
P62158, Q9BRL5, Q96HY3	calmodulin 3 (phosphorylase kinase, delta); calmodulin 2 (phosphorylase kinase, delta); calmodulin 1 (phosphorylase kinase, delta)
Q00534, A4D1G0	cyclin-dependent kinase 6
P62993, Q6ICN0	growth factor receptor-bound protein 2
P08069, Q9UCC0	insulin-like growth factor 1 receptor
Q4LE76, Q96QW8, P42345	mechanistic target of rapamycin (serine/threonine kinase)
P60484	phosphatase and tensin homolog; phosphatase and tensin homolog pseudogene 1
P27986	phosphoinositide-3-kinase, regulatory subunit 1 (alpha)
P17252, Q2TSD3, Q59FI5	protein kinase C, alpha
Q6LE81, Q6DUF0, P78495, Q7KZ61, A8K5E3, Q6LE65, Q7KZ60, Q6LE77, Q6LE82, Q59HH0, Q6LE80, P06400, Q86WG4, Q7Z7J0, Q6LE79, Q7Z5Q6	retinoblastoma 1
Q2XSC7, Q3LRW4, Q3LRW5, P04637, Q3LRW2, Q3LRW3, Q53GA5, Q3LRW1, Q0PKT5, Q19RW5, Q6IT77, Q1MSW8, Q4FEW1, Q2XN98, Q5U0E4, Q1MSX0	tumor protein p53
P15056, A4D1T4, Q75MQ8	v-raf murine sarcoma viral oncogene homolog B1
Non-small cell lung cancer
Q9BRD5, Q9UPJ7, Q53HJ9, Q59EH6, Q9UPJ8, O15530, Q6FI20	3-phosphoinositide dependent protein kinase-1
Q6FH21, Q92934	BCL2-associated agonist of cell death
Q00534, A4D1G0	cyclin-dependent kinase 6
P62993, Q6ICN0	growth factor receptor-bound protein 2
P27986	phosphoinositide-3-kinase, regulatory subunit 1 (alpha)
P17252, Q2TSD3, Q59FI5	protein kinase C, alpha
Q6LE81, Q6DUF0, P78495, Q7KZ61, A8K5E3, Q6LE65, Q7KZ60, Q6LE77, Q6LE82, Q59HH0, Q6LE80, P06400, Q86WG4, Q7Z7J0, Q6LE79, Q7Z5Q6	retinoblastoma 1
Q2XSC7, Q3LRW4, Q3LRW5, P04637, Q3LRW2, Q3LRW3, Q53GA5, Q3LRW1, Q0PKT5, Q19RW5, Q6IT77, Q1MSW8, Q4FEW1, Q2XN98, Q5U0E4, Q1MSX0	tumor protein p53
P15056, A4D1T4, Q75MQ8	v-raf murine sarcoma viral oncogene homolog B1
Melanoma
Q6FH21, Q92934	BCL2-associated agonist of cell death
Q00534, A4D1G0	cyclin-dependent kinase 6
P08069, Q9UCC0	insulin-like growth factor 1 receptor
P60484	phosphatase and tensin homolog; phosphatase and tensin homolog pseudogene 1
P27986	phosphoinositide-3-kinase, regulatory subunit 1 (alpha)
Q6LE81, Q6DUF0, P78495, Q7KZ61, A8K5E3, Q6LE65, Q7KZ60, Q6LE77, Q6LE82, Q59HH0, Q6LE80, P06400, Q86WG4, Q7Z7J0, Q6LE79, Q7Z5Q6	retinoblastoma 1
Q2XSC7, Q3LRW4, Q3LRW5, P04637, Q3LRW2, Q3LRW3, Q53GA5, Q3LRW1, Q0PKT5, Q19RW5, Q6IT77, Q1MSW8, Q4FEW1, Q2XN98, Q5U0E4, Q1MSX0	tumor protein p53
P15056, A4D1T4, Q75MQ8	v-raf murine sarcoma viral oncogene homolog B1
Acute Myeloid Leukemia
P49715, A7LNP2, Q6P3S4, Q05CA4	CCAAT/enhancer binding protein (C/EBP), alpha
Q9BZ95	Wolf-Hirschhorn syndrome candidate 1-like 1
Q9BYG9, P06748, Q9BTI9, Q9NX34, A8K3N7	nucleophosmin 1 (nucleolar phosphoprotein B23, numatrin) pseudogene 21; hypothetical LOC100131044; similar to nucleophosmin 1; nucleophosmin (nucleolar phosphoprotein B23, numatrin)
A6NFQ0, Q15010, Q3KQZ0, P35658, Q86XD3, Q5JUP7, Q75R47	nucleoporin 214kDa
Q01196, Q2TAM6, A8MV94	runt-related transcription factor 1
